# Supplementary material for: Molecular Profiling Defines Evolutionarily Conserved Transcription Factor Signatures of Major Vestibulospinal Neuron Groups
Source: eNeuro. 2019 Feb 27;6(1):ENEURO.0475-18.2019. doi: 10.1523/ENEURO.0475-18.2019 (PMC6426439; doi:10.1523/ENEURO.0475-18.2019)
Supplement: Figure 2-2 — TPM values and ANOVA-like analysis for TFs from mouse RNAseq data. Values calculated with ANOVA-like differential abundance analysis performed in in edgeR. TF inclusion criteria based Gene Ontology class 6355 (regulation of transcription, DNA templated) and counts per million >1 in at least three samples. Columns: (A) assigned gene index, (B) gene name, (C) RefSeq ID, (D) transcript length in nucleotides, (E) likelihood ratio statistics, (F) two-sided p value, (G) false discovery rate adjusted p value, (H) LVST mean TPM value, (I) cMVST mean TPM value, (J) mean caudal control sample TPM value, (K) mean medial control sample TPM value, (L–Q) individual LVST sample TPM values, (R–T) individual cMVST sample TPM values, (U–X) individual caudal control sample TPM values, (Y–AB) individual medial control sample TPM values. Download Figure 2-2, XLSX file. [file sup_enu-eN-NWR-0475-18-s03.xlsx]

## Sheet: Sheet1
Index	Gene.Symbol	RefSeq.ID	Transcript.Length	LR	PValue	FDR	LVST Mean	cMVST Mean	Caudal Control	Medial Control	LVST..1	LVST..2	LVST..3	LVST..4	LVS..5	LVST..6	cMVST..1	cMVST..2	cMVST..3	Caudal.Control..1	Caudal.Control..2	Caudal.Control..3	Caudal.Control..4	Medial.Control..1	Medial.Control..2	Medial.Control..3	Medial.Control..4
23097	Sulf1	NM_172294	4609	627.943	8.81853e-136	1.22101e-131	0.0486698	0.0960895	0.705038	568.069	0	0	0	0	0.249473	0.0425458	0.288269	0	0	1.19834	0	0.273536	1.34827	567.497	593.196	545.738	565.843
2824	Barhl2	NM_001005477	2314	299.224	1.46469e-64	4.05602e-61	0.0337297	0	111.586	0.132715	0	0	0.202378	0	0	0	0	0	0	68.0768	179.53	57.4792	141.256	0.116927	0.30504	0	0.108893
23764	Tfap2a	NM_001122948	3114	294.118	1.86572e-63	4.30546e-60	0.171321	0.32558	265.793	6.3052	0	0.10482	0	0	0.923107	0	0	0.851221	0.125518	334.526	211.899	288.057	228.692	5.90839	5.06238	6.72468	7.52535
17528	Pax2	NM_011037	1251	288.334	3.32967e-62	6.58608e-59	0.146524	5.62225	376.632	163.775	0	0.130459	0.748685	0	0	0	7.7884	3.76687	5.31148	918.509	146.898	211.129	229.99	147.937	175.666	164.116	167.381
17552	Pbx3	NM_016768	2393	232.209	4.60505e-50	6.37615e-47	23.0218	202.111	312.867	453.892	32.6445	24.8932	22.5051	28.1928	14.7351	15.1598	272.796	132.307	201.23	294.928	219.289	257.098	480.152	392.908	482.472	465.504	474.683
22472	Sox1	NM_009233	4037	227.909	3.91572e-49	4.92882e-46	0.00791169	0	17.6891	79.4791	0	0	0	0	0.0474701	0	0	0	0	1.60607	31.0783	25.2958	12.7763	84.8504	80.7216	77.3191	75.0254
23598	Tcf7l2	NM_001142918	4151	217.728	6.22047e-47	6.62528e-44	0.0829056	0	12.0385	86.6845	0	0	0.451267	0	0.0461665	0	0	0	0	11.5701	24.7693	9.71894	2.09585	81.2817	94.0357	78.1201	93.3004
20050	Rfx4	NM_001024918	3940	217.049	8.72161e-47	8.62567e-44	0.07464	0	32.1472	116.404	0.399201	0	0	0	0.0486388	0	0	0	0	11.3974	53.777	56.3168	7.09743	103.077	119.017	118.044	125.477
8558	Gbx2	NM_010262	2126	206.555	1.6171e-44	1.31708e-41	0	0	72.0286	3.32901	0	0	0	0	0	0	0	0	0	117.809	34.4042	81.2417	54.6592	3.69074	1.88141	4.42527	3.31862
10833	Hoxc4	NM_013553	1983	205.739	2.42716e-44	1.86703e-41	0	0	70.0327	0	0	0	0	0	0	0	0	0	0	98.3314	59.7252	100.451	21.6228	0	0	0	0
12534	Lhx5	NM_008499	2736	195.896	3.24974e-42	2.04527e-39	0	56.9477	60.4883	74.1816	0	0	0	0	0	0	50.5035	41.7671	78.5724	13.5165	147.844	45.3881	35.2047	58.1487	77.9132	83.0265	77.6379
13036	Maf	NM_001025577	3642	190.307	5.24064e-41	3.15486e-38	495.26	389.678	38.0598	96.3831	344.484	330.083	470.36	431.542	699.985	695.104	532.619	333.663	302.752	48.4625	28.231	45.1744	30.3714	124.884	81.1425	88.8714	90.6346
18079	Phox2b	NM_008888	2838	188.052	1.60855e-40	9.27997e-38	677.759	8.96835	157.768	63.6847	798.372	651.264	854.595	664.526	546.415	551.384	10.1434	6.01913	10.7425	86.984	58.9749	362.493	122.62	115.073	54.5522	48.9772	36.1364
11515	Irx5	NM_018826	2403	184.437	9.70793e-40	5.37664e-37	0.0249201	0	19.0765	49.61	0	0.0679169	0	0	0	0.0816037	0	0	0	18.4874	21.231	27.0194	9.56826	55.6227	45.1384	49.1289	48.5501
8523	Gata2	NM_008090	3241	172.246	4.16679e-37	2.06048e-34	0	0.546593	0.0958685	67.6901	0	0	0	0	0	0	1.63978	0	0	0	0	0	0.383474	60.1915	70.4193	68.5446	71.605
26421	Yap1	NM_001171147	4167	168.346	2.89509e-36	1.33618e-33	0.00698989	0	13.9389	22.9366	0.0419394	0	0	0	0	0	0	0	0	5.18654	12.3683	22.6913	15.5094	23.1805	23.4328	22.5777	22.5553
10821	Hoxb3	NM_001079869	3390	167.874	3.66202e-36	1.63562e-33	9.23381	11.4497	470.685	58.036	13.6097	12.2764	5.66384	16.759	5.87913	1.21474	7.57724	4.86527	21.9067	690.163	570.58	389.375	232.62	67.6025	55.4557	56.5347	52.5512
8239	Foxp2	NM_212435	6423	166.391	7.65148e-36	3.11595e-33	0.11798	59.0736	36.5374	58.2533	0	0.0254093	0.364551	0.138207	0.14918	0.0305299	74.3989	28.1546	74.6673	7.51479	42.6736	12.6603	83.301	64.7042	59.7835	50.8175	57.7082
7379	Evx1	NM_007966	2877	148.97	4.39481e-32	1.56027e-29	0	39.1779	8.58447	7.38773	0	0	0	0	0	0	37.5606	40.8462	39.127	7.34517	5.51898	6.35404	15.1197	7.89984	7.52397	7.12041	7.00669
23573	Tcf12	NM_011544	4707	145.297	2.72355e-31	9.42758e-29	28.7225	15.635	230.363	202.574	21.9426	27.6688	55.1178	21.971	24.3465	21.2883	22.1109	5.94426	18.8497	140.705	296.85	282.171	201.727	193.946	193.349	212.835	210.169
23366	Tal1	NM_011527	4161	143.347	7.17258e-31	2.42223e-28	0.0153518	0	0.867326	62.9935	0	0	0	0	0.092111	0	0	0	0	0	0	2.4239	1.04541	50.8497	67.2896	66.919	66.9156
15270	Nhlh1	NM_010916	2487	140.702	2.66695e-30	8.3924e-28	0.103238	2.66379	100.401	27.7673	0	0.262492	0	0.356937	0	0	4.45192	0.710549	2.82892	16.6078	198.336	141.433	45.226	18.9301	30.3688	35.0225	26.748
15577	Notch1	NM_008714	9489	138.949	6.36984e-30	1.91732e-27	0.143773	0.0137304	46.7356	41.175	0.626187	0	0.0493522	0.187101	0	0	0	0	0.0411911	41.731	81.2244	46.5017	17.4854	29.5976	47.3848	45.416	42.3017
21285	Sfrp1	NM_013834	4370	138.232	9.09016e-30	2.67792e-27	29.7093	182.177	42.729	314.761	34.5923	23.9391	38.9002	18.1806	13.4628	49.1805	195.798	173.815	176.917	29.2341	49.0811	32.0231	60.5777	375.268	314.65	280.014	289.112
27115	Zic3	NM_009575	4035	133.815	8.14283e-29	2.16819e-26	0.030488	1.60923	45.7167	3.85486	0	0.0404471	0	0	0.142481	0	0	1.8248	3.00291	33.3871	63.284	39.9934	46.2022	4.55978	3.96519	3.45984	3.43464
17538	Pax8	NM_011040	2527	127.267	2.09854e-27	4.92482e-25	0	2.8357	102.03	109.524	0	0	0	0	0	0	0	0	8.50709	192.623	50.267	102.275	62.9535	93.7946	125.046	109.169	110.085
24959	Tshz3	NM_172298	5002	122.355	2.39987e-26	5.35946e-24	26.3499	9.94869	158.874	110.268	30.6409	36.3147	19.7545	19.6991	24.4048	27.2853	11.156	3.06181	15.6282	163.468	111.05	145.682	215.298	112.133	121.36	101.688	105.889
27113	Zic1	NM_009573	3350	120.803	5.18138e-26	1.12096e-23	9.89858	0.273337	951.319	3.5936	1.7737	3.99485	22.7861	30.0759	0	0.76096	0	0.703337	0.116675	864.636	1235.36	587.838	1117.44	2.82685	3.86293	3.39725	4.28739
21542	Skor2	NM_001109743	3141	120.524	5.9515e-26	1.26776e-23	0	0	22.7728	0.454241	0	0	0	0	0	0	0	0	0	9.32719	54.5289	9.2317	18.0036	0.344565	0.524359	0.386486	0.561555
18653	Pou3f1	NM_011141	3011	119.657	9.14904e-26	1.89071e-23	103.172	4.5303	29.8198	7.63048	120.203	136.265	151.02	102.155	51.362	58.027	4.2655	2.44539	6.88001	26.159	14.6098	20.5167	57.9937	10.1542	9.29898	6.04758	5.02115
17199	Olig3	NM_053008	2066	119.525	9.76754e-26	1.98884e-23	0	0	44.3126	0.530107	0	0	0	0	0	0	0	0	0	11.8557	135.314	21.3579	8.72273	0.654815	0.341657	0.514137	0.609821
12530	Lhx1	NM_008498	2750	115.368	7.67172e-25	1.49609e-22	0.256244	115.24	61.7907	68.5434	1.39809	0	0	0	0.139372	0	133.668	74.3268	137.726	117.536	60.6728	34.1543	34.7995	32.0748	84.1046	82.2176	75.7766
4357	Cenpf	NM_001081363	11122	114.62	1.11138e-24	2.11205e-22	0.157449	0	14.0071	34.1314	0.25141	0	0	0.279353	0.3963	0.0176311	0	0	0	5.52734	38.8034	9.29507	2.40254	42.2811	30.0403	33.9589	30.2455
12540	Lhx9	NM_001025565	4924	114.616	1.11353e-24	2.11205e-22	0	1.93282	15.6257	11.6099	0	0	0	0	0	0	3.68764	1.55515	0.555653	8.72959	14.273	8.83329	30.6671	8.90176	11.707	13.4979	12.3328
22491	Sox6	NM_011445	8227	114.235	1.3451e-24	2.51679e-22	0.0237199	4.12596	15.6328	28.5129	0	0.119026	0	0	0.0232937	0	1.13047	10.0597	1.18774	15.6744	28.0008	14.0217	4.83419	25.3895	32.3174	27.0029	29.3418
14754	Myc	NM_010849	2399	113.278	2.1621e-24	3.939e-22	394.44	258.777	109.039	76.7478	438.105	440.767	417.744	267.902	424.972	377.147	211.562	336.018	228.75	122.221	78.2301	71.9966	163.709	86.5056	80.9138	69.1988	70.3732
15736	Nr4a2	NM_013613	3171	112.86	2.65922e-24	4.72046e-22	0.475349	5.86	136.252	120.414	0	0.566145	0.295366	1.25975	0.483474	0.247359	4.60893	12.7246	0.246523	39.9849	138.316	72.5585	294.15	124.32	126.14	118.438	112.758
23675	Tead2	NM_011565	2115	112.568	3.0738e-24	5.31997e-22	0.139906	0	31.29	24.9138	0	0	0	0.839435	0	0	0	0	0	38.0359	32.614	31.5927	22.9176	24.1786	23.3619	26.9767	25.1382
2823	Barhl1	NM_019446	3674	112.196	3.69658e-24	6.31887e-22	0.205058	0	36.5268	0.284164	0.332969	0.844006	0	0	0	0.0533733	0	0	0	39.5435	71.2026	12.6965	22.6647	0.147289	0.192124	0.454323	0.34292
10812	Hoxa4	NM_008265	1528	103.12	3.31583e-22	4.6848e-20	0	0	34.7363	0.327319	0	0	0	0	0	0	0	0	0	43.5327	16.3537	40.0166	39.0421	0	0.615936	0.198618	0.494721
5436	Ctnnb1	NM_007614	3622	102.9	3.69748e-22	5.17124e-20	176.01	154.601	473.541	835.081	165.497	153.201	174.676	213.103	214.07	135.511	180.721	109.45	173.633	310.083	409.058	589.291	585.733	1035.81	731.912	817.917	754.682
5916	Dcn	NM_001190451	1886	101.416	7.70818e-22	1.04635e-19	0	0	0	22.1623	0	0	0	0	0	0	0	0	0	0	0	0	0	15.3504	24.4519	22.126	26.7209
17209	Onecut2	NM_194268	13391	101.091	9.05688e-22	1.21749e-19	111.866	275.484	22.1964	151.817	142.957	107.287	104.285	123.765	108.333	84.5673	421.809	186.752	217.892	9.86299	10.8076	41.8956	26.2193	181.605	141.707	139.29	144.665
2385	Arx	NM_007492	2729	100.421	1.26176e-21	1.66384e-19	0	0	0	14.8385	0	0	0	0	0	0	0	0	0	0	0	0	0	16.8548	14.657	13.623	14.2194
15229	Nfix	NM_001081981	3562	99.8799	1.64935e-21	2.15442e-19	0	3.58455	140.679	41.786	0	0	0	0	0	0	0	0	10.7536	141.776	325.846	74.858	20.2371	28.1052	50.532	41.3227	47.184
22457	Sorbs3	NM_011366	2914	99.8575	1.66774e-21	2.15809e-19	0	0	19.3241	9.68432	0	0	0	0	0	0	0	0	0	5.35652	27.5125	4.97542	39.4518	6.12821	10.6582	10.6231	11.3278
23594	Tcf4	NM_013685	7462	97.7335	4.77296e-21	5.95373e-19	25.5173	33.1548	327.461	229.621	22.0618	27.2736	25.6054	23.9711	26.9144	27.2776	26.3518	3.39439	69.7183	291.788	412.107	370.937	235.01	224.411	223.715	240.834	229.522
22481	Sox2	NM_011443	2456	96.7661	7.7041e-21	9.43991e-19	0.0130047	2.97072	41.0474	112.275	0	0	0	0	0.0780281	0	0	0	8.91217	16.2307	84.2573	49.2793	14.4222	124.709	108.83	107.629	107.932
12532	Lhx3	NM_001039653	2208	95.8471	1.2141e-20	1.42461e-18	0	0	0	16.8754	0	0	0	0	0	0	0	0	0	0	0	0	0	10.9061	19.3942	18.1433	19.0581
6838	Ednrb	NM_001136061	3878	93.3337	4.21098e-20	4.81861e-18	0.0157469	11.5572	58.3434	368.735	0.0450648	0	0	0	0.0494164	0	0	0	34.6716	16.7811	78.2635	115.735	22.5942	374.388	375.198	345.826	379.526
26830	Zfp503	NM_145459	4213	93.3391	4.1998e-20	4.81861e-18	8.77254	98.7055	233.696	83.9741	3.15259	15.6115	17.2293	6.21581	2.00143	8.42462	123.833	69.4886	102.795	176.184	381.95	89.0261	287.626	76.4248	80.0301	88.1721	91.2695
14567	Msx3	NM_010836	2287	93.2921	4.29855e-20	4.8785e-18	0.999711	0	94.9825	0.803291	1.29906	0.214085	0.409534	4.07559	0	0	0	0	0	33.2853	251.078	71.1124	24.4546	0.828153	0.617283	1.32701	0.440714
5601	Cyp1b1	NM_009994	5128	92.3107	6.9853e-20	7.61562e-18	0	0.0287881	0.0634499	10.9896	0	0	0	0	0	0	0.0863644	0	0	0	0.253799	0	0	13.4018	9.91071	10.1794	10.4663
7983	Fev	NM_153111	1479	90.196	1.98823e-19	2.10146e-17	0	0	0	22.1029	0	0	0	0	0	0	0	0	0	0	0	0	0	24.1482	27.3627	18.16	18.7408
10707	Hmga2	NM_010441	4176	89.8971	2.30491e-19	2.41772e-17	0.0766218	0.0235091	10.6592	20.6862	0	0	0	0.318859	0	0.140872	0	0.0705274	0	1.84013	22.003	13.5854	5.20826	25.7222	17.9734	19.077	19.9724
25441	Uncx	NM_013702	2093	89.6079	2.65932e-19	2.74783e-17	0	15.21	38.7328	6.26554	0	0	0	0	0	0	2.96239	39.1196	3.5482	51.9742	32.2106	26.8048	43.9418	7.62714	4.38424	6.67006	6.38071
12531	Lhx2	NM_010710	2286	87.7956	6.51585e-19	6.53757e-17	0.0139718	13.5363	67.4083	34.3406	0	0	0	0	0.0838307	0	21.117	0	19.4918	128.577	22.3177	72.798	45.9405	54.2086	19.9675	37.1726	26.0135
15578	Notch2	NM_010928	10506	87.0519	9.41156e-19	9.37499e-17	0.290991	0.0620062	15.691	27.1549	0.948162	0.450497	0.178299	0.16899	0	0	0	0	0.186019	8.15999	29.2357	16.2001	9.1681	31.0333	26.3148	24.3374	26.9343
8524	Gata3	NM_008091	3215	86.4709	1.25427e-18	1.23167e-16	0.019869	3.21424	0.751895	127.766	0	0	0	0	0.119214	0	9.64273	0	0	0.298771	0	0.19607	2.51274	137.178	128.219	120.97	124.696
4053	Cd36	NM_001159555	3539	86.3738	1.31597e-18	1.28104e-16	0	0	0	8.24353	0	0	0	0	0	0	0	0	0	0	0	0	0	6.42211	8.57646	9.0043	8.97124
15222	Nfia	NM_010905	9513	85.9732	1.60416e-18	1.52131e-16	16.2609	47.7535	131.219	177.32	14.8803	9.60731	11.3716	22.5822	28.3638	10.7601	54.2364	30.4337	58.5903	74.9718	229.104	161.55	59.2481	212.178	174.839	160.581	161.681
23672	Tead1	NM_001166584	9960	85.0945	2.47672e-18	2.31707e-16	2.75685	20.2687	46.8727	77.5391	4.43922	0.458807	1.41055	4.67915	4.17522	1.37817	21.1656	5.26355	34.377	37.0332	46.6496	69.5553	34.2529	75.4389	80.0119	77.8221	76.8836
4032	Cd28	NM_007642	4317	84.8644	2.77497e-18	2.56149e-16	0	8.83931	0	0.126873	0	0	0	0	0	0	13.1314	11.6663	1.72026	0	0	0	0	0.125351	0.0545026	0.210902	0.116738
15181	Neurod2	NM_010895	3137	83.6012	5.18053e-18	4.53985e-16	0.177604	5.60951	138.004	27.2189	0	0	0.149284	0	0.916339	0	0	8.35591	8.47263	104.491	212.751	142.068	92.7078	20.1827	27.4515	31.2001	30.0414
18882	Prdm13	NM_001080771	3174	82.1	1.08774e-17	9.23977e-16	0	0	9.36665	0.179328	0	0	0	0	0	0	0	0	0	15.5098	4.59251	9.53292	7.83137	0.340982	0.0741297	0.143425	0.158776
26104	Vsx2	NM_007701	3180	80.8218	2.04531e-17	1.68568e-15	0	0	0.0991139	11.502	0	0	0	0	0	0	0	0	0	0	0	0.396456	0	9.27424	13.3182	10.9752	12.4404
11053	Id3	NM_008321	953	79.8006	3.3869e-17	2.72646e-15	0.155247	0.412064	79.7076	55.4008	0	0	0	0.931482	0	0	0	1.23619	0	47.1202	191.74	75.4056	4.56447	62.7449	54.0692	51.9082	52.881
2422	Ascl1	NM_008553	2259	79.5542	3.82516e-17	3.06146e-15	4.88153	0	30.2121	94.8692	12.0685	3.17883	9.32874	0.982407	0.0848326	3.64583	0	0	0	22.6424	11.2922	57.2044	29.7093	98.2147	105.51	92.0942	83.658
8208	Foxd3	NM_010425	2373	79.4128	4.10187e-17	3.2454e-15	0	0	17.2254	2.11763	0	0	0	0	0	0	0	0	0	7.38727	9.54312	8.50049	43.4706	1.7103	2.08219	1.59865	3.07938
18891	Prdm8	NM_029947	3119	78.8038	5.54105e-17	4.23875e-15	0.131482	0.250633	29.3478	14.9959	0.504281	0	0	0.284611	0	0	0	0	0.751899	17.1691	32.4641	29.3052	38.4527	16.4823	15.54	15.5198	12.4414
2683	Aurkb	NM_011496	1957	78.584	6.17625e-17	4.67303e-15	0	0	20.0312	10.9222	0	0	0	0	0	0	0	0	0	20.3693	44.9567	13.5285	1.27015	7.88067	12.7442	11.4758	11.5882
18324	Plagl1	NM_009538	5261	78.03	8.11972e-17	6.0027e-15	1.51963	3.91051	43.4171	65.9744	0.697584	1.67516	0.712112	5.23071	0.764945	0.0372731	2.69379	2.35125	6.68649	34.8726	27.8554	51.8813	59.0591	99.2586	52.1023	57.8882	54.6487
26357	Wwtr1	NM_133784	4750	77.6748	9.67598e-17	7.01433e-15	0.362024	0	25.8207	36.6956	0	0.309229	1.67603	0.186885	0	0	0	0	0	5.71273	53.1553	13.8017	30.6131	40.7848	34.3272	35.3324	36.3379
11223	Ikzf1	NM_001025597	5163	77.1564	1.24983e-16	8.96641e-15	0	0	0.339512	8.05731	0	0	0	0	0	0	0	0	0	0.465111	0.0504158	0	0.842521	7.80842	7.20035	8.58207	8.63841
2535	Atoh1	NM_007500	2090	77.041	1.3231e-16	9.39471e-15	0	0	23.2504	0.14761	0	0	0	0	0	0	0	0	0	10.5706	66.8801	6.3338	9.21723	0.517836	0	0.0726047	0
10423	Hbb-y	NM_008221	619	76.6589	1.59776e-16	1.1173e-14	0.0515985	0	3103.1	1474.29	0	0	0	0	0.309591	0	0	0	0	0	0	8635.69	3776.71	973.001	1591.9	1681.19	1651.09
2687	Auts2	NM_177047	6059	76.6036	1.64197e-16	1.14245e-14	65.8719	43.5858	252.087	77.7558	103.49	105.238	54.6443	35.4554	50.4791	45.9245	55.9169	33.1028	41.7376	290.035	274.087	211.925	232.302	75.6023	80.2284	82.8718	72.3205
26324	Wnt5a	NM_009524	4273	76.5358	1.69788e-16	1.1696e-14	0.515243	0.414581	78.3974	31.2377	0.490788	2.06249	0	0	0.53818	0	1.24374	0	0	61.1441	115.132	83.9404	53.3726	27.8611	32.2123	34.9796	29.8977
4530	Chd7	NM_001081417	9443	75.4783	2.86151e-16	1.95175e-14	28.7442	27.3122	107.391	101.945	34.3674	24.421	34.3677	21.6215	28.5944	29.0932	30.2036	22.9243	28.8087	94.8036	169.663	91.8544	73.2437	90.0561	107.391	108.292	102.04
9880	Gpc3	NM_016697	2266	73.8812	6.29317e-16	4.1493e-14	0.0398029	0	27.6382	6.99704	0.154247	0	0	0	0.0845706	0	0	0	0	13.9886	81.5581	13.9092	1.09695	4.89557	8.72204	7.03138	7.33916
17197	Olig1	NM_016968	2171	73.6291	7.12679e-16	4.6111e-14	0.0147119	0	9.21222	22.3776	0	0	0	0	0.0882713	0	0	0	0	25.4406	1.07907	1.74214	8.5871	15.9525	26.986	20.6892	25.8826
12474	Lef1	NM_010703	2457	72.965	9.88967e-16	6.31024e-14	0.0110707	0	13.9925	3.57967	0	0.0664242	0	0	0	0	0	0	0	5.37547	16.103	6.67052	27.821	2.97329	4.21353	3.95263	3.17921
23821	Tgif1	NM_009372	1632	72.705	1.12434e-15	7.10847e-14	0.0666684	0	31.105	12.3166	0	0.40001	0	0	0	0	0	0	0	4.26714	69.54	24.7202	25.8925	10.9422	13.2638	13.0172	12.0431
10811	Hoxa3	NM_010452	2542	72.206	1.43807e-15	8.92891e-14	2.84042	16.4427	245.445	57.9665	0.0687495	5.26465	1.10536	0.349214	3.54325	6.71131	37.2839	2.66484	9.37946	429.828	126.564	243.02	182.368	63.3316	60.2566	57.4263	50.8516
3117	Bnc2	NM_172870	6453	72.0035	1.58919e-15	9.69335e-14	0.212586	0	28.5673	9.04357	0	0.404659	0.870856	0	0	0	0	0	0	36.655	47.7594	20.5139	9.34104	18.6166	3.31802	9.24149	4.99817
10418	Hba-x	NM_010405	598	71.7841	1.77079e-15	1.07067e-13	0	0	490.073	297.391	0	0	0	0	0	0	0	0	0	0	0	835.918	1124.37	260.163	332.865	334.446	262.091
8232	Foxn4	NM_148935	2970	71.0702	2.51806e-15	1.48996e-13	0	0	0	6.30432	0	0	0	0	0	0	0	0	0	0	0	0	0	6.55926	7.52603	4.85376	6.27824
17530	Pax3	NM_008781	3868	70.9747	2.63947e-15	1.55515e-13	0	1.2126	26.2811	2.98881	0	0	0	0	0	0	0	0	3.63781	15.2103	47.9813	34.0605	7.87217	3.70739	1.4599	3.53075	3.25721
20963	Scrt2	NM_001160410	3394	70.7771	2.90964e-15	1.69272e-13	166.482	75.3146	377.958	81.5142	190.157	273.081	158.401	144.114	79.0488	154.09	102.172	37.0539	86.7175	321.008	469.362	301.995	419.467	68.7186	90.0526	89.7766	77.5088
8379	Fzd7	NM_008057	4809	70.5599	3.23857e-15	1.86063e-13	0.0552323	0.153489	9.64216	15.2117	0	0	0	0.092296	0.239098	0	0.460466	0	0	17.5771	4.65492	12.9769	3.35972	16.5976	16.9286	14.4834	12.8373
3072	Birc5	NM_001012273	3416	70.1505	3.9631e-15	2.25815e-13	0	0	3.2127	6.73787	0	0	0	0	0	0	0	0	0	2.03863	2.89557	6.64318	1.2734	6.41573	5.99239	7.24071	7.30264
6306	Dmbx1	NM_001025567	4017	70.0935	4.07611e-15	2.31303e-13	0.561179	0.894134	54.702	0.6878	1.21815	1.13759	0.816061	0	0	0.195264	2.53576	0.146638	0	10.9995	71.4083	51.4711	84.9289	1.01034	1.11289	0.188877	0.439095
15328	Nkx1-2	NM_009123	1903	69.4902	5.48801e-15	3.0889e-13	0	15.7688	0	3.42544	0	0	0	0	0	0	23.2726	22.596	1.43775	0	0	0	0	2.98579	2.96737	4.30592	3.44268
6743	E2f8	NM_001013368	3690	68.8257	7.61532e-15	4.15125e-13	0	0	4.55655	5.1774	0	0	0	0	0	0	0	0	0	1.95233	10.1579	3.75827	2.35769	5.71936	5.35614	5.26374	4.37035
22482	Sox21	NM_177753	3795	68.725	8.00288e-15	4.33257e-13	0	2.43752	14.2171	43.8165	0	0	0	0	0	0	0	0	7.31257	1.45537	25.2409	26.0783	4.09367	57.8926	40.5476	40.9049	35.921
10523	Hes1	NM_008235	1451	68.0233	1.13094e-14	6.0694e-13	0	2.85852	19.2086	18.6136	0	0	0	0	0	0	1.22089	3.04468	4.30999	4.63393	18.8361	18.2462	35.1181	20.5118	17.0263	17.9876	18.9287
10090	Grin1	NM_001177656	3881	67.5816	1.40602e-14	7.43043e-13	103.843	74.969	106.563	16.1371	115.097	158.41	101.721	94.6944	33.0834	120.051	94.8288	66.6299	63.4484	139.466	107.915	80.237	98.6329	9.69059	18.2483	18.8849	17.7248
17535	Pax6	NM_013627	2550	67.121	1.76423e-14	9.25285e-13	0.279479	0.173391	17.3965	53.5237	0.0685338	0.0640016	1.46918	0	0.0751517	0	0.173677	0.346497	0	19.5876	28.9899	20.7649	0.243694	53.2651	52.0401	52.3665	56.4233
12754	Lrp4	NM_172668	8027	66.5072	2.38727e-14	1.22878e-12	0.0234903	0	3.89301	2.74757	0.0653151	0.0203319	0	0.0552948	0	0	0	0	0	0.867568	3.14548	7.14628	4.41272	1.8202	2.66739	2.98686	3.51583
24577	Tox3	NM_172913	3193	66.275	2.67667e-14	1.35485e-12	30.0091	183.909	123.386	181.386	27.2569	14.6695	45.4663	36.142	22.9268	33.5932	174.904	263.714	113.109	113.488	169.401	142.538	68.1168	192.102	180.095	178.785	174.562
23596	Tcf7l1	NM_001079822	2784	66.2474	2.7133e-14	1.36612e-12	0.041849	0	14.1977	8.46657	0.251094	0	0	0	0	0	0	0	0	33.2948	2.33743	12.4533	8.70523	8.06655	8.53593	8.39388	8.86991
10823	Hoxb4	NM_010459	2565	65.8058	3.37269e-14	1.67979e-12	0	0	10.3135	0.225213	0	0	0	0	0	0	0	0	0	13.2941	14.0043	10.3218	3.63403	0.527426	0.27519	0	0.098237
8046	Fgfr3	NM_001163217	4015	65.5879	3.75483e-14	1.85676e-12	0.540546	3.38623	9.99263	87.3017	0.435271	0.731675	0.116638	1.76877	0.190921	0	1.10306	5.64838	3.40727	0.598099	1.29662	32.8135	5.26233	90.9761	87.0828	83.034	88.1138
27117	Zic5	NM_022987	2383	65.4598	3.99941e-14	1.96368e-12	0	0	9.13059	0.0283854	0	0	0	0	0	0	0	0	0	15.3172	12.2338	7.40671	1.56463	0.113542	0	0	0
3633	Casz1	NM_001159344	7966	65.1596	4.63683e-14	2.25269e-12	42.9551	67.5925	6.35805	14.7285	60.9449	50.7683	29.6878	43.0702	46.526	26.7333	50.5366	44.7366	107.504	3.82844	5.32618	14.6394	1.63819	23.3004	13.9412	11.677	9.99561
12645	Lmo4	NM_010723	1703	65.0943	4.78831e-14	2.31814e-12	67.1821	178.834	480.092	190.406	76.1438	94.5875	77.8213	44.5676	83.8341	26.1381	147.452	152.19	236.858	371.133	311.5	617.409	620.325	279.149	184.168	157.447	140.859
23534	Tbx20	NM_194263	4043	65.0349	4.93055e-14	2.37869e-12	0	0.328625	5.54241	69.7908	0	0	0	0	0	0	0.985874	0	0	0.653353	0	21.5163	0	112.498	74.0257	51.1943	41.4458
10189	Gsx1	NM_008178	1772	65.021	4.96442e-14	2.38671e-12	0	0	12.3156	0.0687451	0	0	0	0	0	0	0	0	0	3.1169	24.5313	15.6524	5.9617	0	0.132781	0	0.1422
13197	Mapk8ip1	NM_011162	2930	64.8774	5.32834e-14	2.55281e-12	232.652	154.393	171.965	74.7527	236.614	188.66	256.687	294.184	247.297	172.469	177.755	131.48	153.944	130.477	156.267	213.205	187.911	51.2512	81.6681	82.2421	83.8493
17436	Pak6	NM_001033254	4135	64.8614	5.37028e-14	2.56403e-12	93.2475	100.997	39.7178	24.1854	84.4011	116.947	56.0604	119.362	73.6423	109.073	96.8224	72.7937	133.375	49.305	28.5162	24.5438	56.5064	15.9005	28.6214	25.468	26.7517
7174	Epas1	NM_010137	5352	64.4653	6.52715e-14	3.09503e-12	0.0168523	0	23.792	30.1224	0.0653069	0	0	0	0.0358066	0	0	0	0	0.0897372	0	7.06686	88.0112	27.2491	34.9502	29.2884	29.0019
15341	Nkx6-1	NM_144955	1795	64.2517	7.25132e-14	3.42668e-12	0	3.4887	0.963248	50.0865	0	0	0	0	0	0	1.97382	0	8.49227	0	0	3.1606	0.69239	31.8051	60.9519	54.5264	53.0628
15185	Neurog2	NM_009718	2217	63.7783	9.15479e-14	4.28234e-12	0.147876	0.0587674	13.7268	15.4933	0	0	0	0.800814	0.0864398	0	0	0	0.176302	13.5395	8.57089	19.9032	12.8937	16.7199	14.4335	17.5221	13.2979
7328	Esrrg	NM_011935	5260	63.2669	1.17764e-13	5.4534e-12	753.448	587.657	397.066	130.614	878.691	774.817	872.948	762.563	681.04	550.628	636.193	831.774	295.004	169.694	502.383	241.839	674.347	133.382	133.166	126.184	129.726
26798	Zfp423	NM_033327	4907	62.648	1.59707e-13	7.2265e-12	88.9823	24.2329	242.31	114.848	119.345	104.634	112.328	70.8244	35.9685	90.7937	27.2567	8.40292	37.0391	223.694	280.56	193.85	271.135	98.038	120.305	123.046	118.004
26495	Zbtb18	NM_013915	4946	61.1494	3.33925e-13	1.47716e-11	4.30916	0.954555	22.7361	33.3175	5.93609	2.83776	5.49162	5.29463	5.50191	0.792938	1.16405	0.119095	1.58052	17.0902	23.5246	31.7349	18.5948	31.127	33.4902	35.5889	33.0638
7353	Ets1	NM_011808	5060	61.0247	3.55056e-13	1.55573e-11	0.0805882	0	11.2428	22.5091	0.483529	0	0	0	0	0	0	0	0	1.51865	1.28605	2.98987	39.1765	17.1646	25.7142	24.0511	23.1063
22477	Sox14	NM_011440	2055	60.8827	3.80744e-13	1.6526e-11	0	0	3.82138	27.287	0	0	0	0	0	0	0	0	0	0	0.126665	2.76072	12.3982	29.3611	28.5093	26.509	24.7686
11051	Id1	NM_010495	911	60.4726	4.65879e-13	1.98479e-11	0	1.71619	42.8638	49.7215	0	0	0	0	0	0	0	0	5.14857	7.64431	46.2877	110.02	7.50342	46.3324	47.2641	49.9705	55.319
4223	Cdk2	NM_183417	2432	60.4645	4.67734e-13	1.98658e-11	0	0	5.70997	9.63536	0	0	0	0	0	0	0	0	0	0.987405	0.749209	10.627	10.4762	10.9029	9.28767	8.92244	9.42845
11513	Irx3	NM_008393	2055	60.392	4.84732e-13	2.04622e-11	0	0	6.33361	12.6952	0	0	0	0	0	0	0	0	0	0.70113	2.27997	19.6318	2.72155	13.0347	12.3655	12.9961	12.3843
26640	Zfhx4	NM_030708	13874	60.2001	5.32728e-13	2.24199e-11	74.4068	227.204	212.65	426.459	81.939	71.3563	37.3994	58.3527	120.364	77.0297	304.178	122.87	254.565	139.177	200.035	253.845	257.544	508.064	418.528	392.977	386.267
1496	Aff4	NM_033565	10165	59.689	6.84985e-13	2.81433e-11	75.3941	65.8226	152.055	218.851	90.312	84.452	85.1376	74.1426	65.1735	53.1469	70.4507	45.5764	81.4408	151.547	146.473	147.219	162.981	205.17	217.094	223.025	230.114
19622	Rac3	NM_133223	1078	59.5871	7.20199e-13	2.95026e-11	334.929	157.728	179.267	29.1691	451.818	598.163	371.862	256.1	108.796	222.834	101.475	149.447	222.262	279.12	206.933	111.688	119.326	11.2946	37.1047	31.8127	36.4643
4235	Cdk6	NM_009873	2470	59.3069	8.26616e-13	3.3762e-11	0	0.527479	11.5047	13.0674	0	0	0	0	0	0	0	0	1.58244	2.91664	7.79836	23.4792	11.8246	11.5019	13.9077	13.7	13.16
11909	Kdm6b	NM_001017426	6644	59.156	8.9033e-13	3.62574e-11	39.961	27.6678	145.99	56.9796	58.4467	42.3977	51.8065	21.4443	35.4776	30.1932	26.6633	21.278	35.0623	186.645	190.208	101.044	106.064	46.5067	61.9737	60.6153	58.8227
18886	Prdm16	NM_027504	8605	58.2484	1.39113e-12	5.55088e-11	0.987529	0.726763	36.3377	6.92007	1.11701	0.682783	1.63266	0.257903	0.913087	1.32172	0	0	2.18029	13.5905	77.6806	19.6325	34.4471	4.71649	6.535	8.28816	8.1406
7421	Eya1	NM_010164	4330	57.6328	1.88289e-12	7.4064e-11	25.2738	0.230479	19.0326	19.6685	12.2293	36.9754	7.89517	17.1185	55.2339	22.1907	0.306843	0.204057	0.180537	9.81622	26.2701	30.5719	9.47198	25.6822	16.4647	20.2909	16.236
12627	Lmcd1	NM_144799	1727	57.4867	2.02312e-12	7.93545e-11	0	0	28.5555	4.97263	0	0	0	0	0	0	0	0	0	8.06482	100.682	5.47508	0	3.76009	4.08722	5.6234	6.41982
19015	Prmt8	NM_201371	1981	57.3186	2.19734e-12	8.57023e-11	429.918	747.261	196.611	114.818	286.182	255.887	344.903	285.221	769.74	637.576	725.236	1100.04	416.512	133.827	322.316	153.693	176.607	162.26	95.1364	108.005	93.8717
15180	Neurod1	NM_010894	2494	56.8449	2.77345e-12	1.06374e-10	0.246136	6.4041	64.9467	35.8938	0	0.785265	0	0	0.691553	0	7.45823	0	11.7541	41.8843	23.7962	123.343	70.7631	41.334	34.6233	34.6808	32.937
8202	Foxb2	NM_008023	1515	56.6873	2.99678e-12	1.13993e-10	0	0	13.1049	0.461297	0	0	0	0	0	0	0	0	0	17.4357	6.35708	22.8845	5.74249	0	0.310611	1.20193	0.332644
11524	Isl1	NM_021459	2526	56.1367	3.92805e-12	1.46994e-10	0	10.3443	5.05173	86.9192	0	0	0	0	0	0	31.0329	0	0	0.950661	9.27423	9.98202	0	139.248	80.2921	68.7834	59.3535
24006	Tlx3	NM_019916	1532	55.8415	4.54128e-12	1.6547e-10	0.0190123	0	19.5215	0.137831	0.114074	0	0	0	0	0	0	0	0	27.901	7.8157	41.558	0.811253	0.353224	0	0.198099	0
6777	Ebf3	NM_001113415	5023	55.8214	4.58634e-12	1.66673e-10	76.1768	62.8911	1040.13	480.886	31.6609	202.584	74.5853	72.4583	48.7963	26.976	52.99	2.93174	132.752	743.549	840.64	1070.1	1506.23	668.586	355.999	471.303	427.655
8199	Foxa2	NM_010446	2127	55.7893	4.65925e-12	1.6888e-10	0	0	0	5.01927	0	0	0	0	0	0	0	0	0	0	0	0	0	5.21549	3.87168	5.42197	5.56792
13388	Mdk	NM_001012335	858	55.2521	6.06629e-12	2.15369e-10	3.11505	12.9328	253.03	98.5285	0.407369	0	2.72904	10.8635	4.69041	0	5.67791	19.9094	13.211	116.15	515.739	203.509	176.721	77.8912	98.9963	101.516	115.71
22488	Sox5	NM_011444	2917	54.8741	7.30424e-12	2.52836e-10	0.31261	2.44233	17.6219	25.6556	0.419379	0	0.802713	0.456481	0.19709	0	3.34017	0.100968	3.88584	17.2879	29.8043	12.3177	11.0778	22.447	26.5374	26.6865	26.9514
26429	Ybx3	NM_139117	1862	54.8069	7.54945e-12	2.59379e-10	376.727	382.522	138.852	159.981	368.388	336.225	304.321	314.653	484.033	452.742	375.565	434.666	337.334	180.812	78.7041	84.6354	211.256	170.014	160.986	154.515	154.408
26467	Ywhah	NM_011738	1764	54.3595	9.40476e-12	3.19163e-10	402.514	561.56	181.727	275.429	363.69	380.717	336.626	393.276	440.2	500.572	531.753	677.201	475.726	189.632	148.151	213.338	175.787	387.141	264.365	231.659	218.552
27114	Zic2	NM_009574	2967	54.2819	9.76992e-12	3.30744e-10	0.59207	0.198532	89.9728	0.787453	0	0	0	0	3.55242	0	0	0.595596	0	71.4664	149.756	74.9978	63.6709	0.729544	1.34813	0.562583	0.509561
8753	Gli2	NM_001081125	6708	54.1562	1.03921e-11	3.49244e-10	0.00434211	0.748251	7.70334	7.53348	0.0260527	0	0	0	0	0	2.24475	0	0	1.53934	9.9338	11.5586	7.78164	6.21164	8.41816	7.57815	7.92596
1968	Anxa4	NM_013471	2003	53.8472	1.20948e-11	4.01595e-10	0.02716	0	13.985	4.51308	0	0.16296	0	0	0	0	0	0	0	5.75465	40.5455	1.57355	8.06636	4.18755	4.81617	4.39398	4.65461
22508	Sp8	NM_177082	4478	53.5852	1.37552e-11	4.50248e-10	0	0	0.155301	4.22476	0	0	0	0	0	0	0	0	0	0	0.0581279	0.563077	0	4.77334	3.94072	3.96472	4.22027
15303	Nipbl	NM_027707	8815	53.499	1.43504e-11	4.6642e-10	58.3586	76.4108	105.973	227.255	46.1338	46.2674	64.0695	49.5965	62.1543	81.93	82.2952	55.3295	91.6076	70.5019	127.269	132.008	94.1118	247.395	221.568	224.354	215.703
21540	Skor1	NM_001163758	3597	53.4997	1.43454e-11	4.6642e-10	0.476691	0.434654	67.72	3.46873	0	1.99638	0	0.863764	0	0	0	0	1.30396	38.5207	87.3445	41.3583	103.656	2.78317	3.7939	3.3749	3.92293
15729	Nr2f2	NM_009697	4216	53.0227	1.81304e-11	5.79753e-10	45.0372	47.2675	242.648	284.686	46.4262	10.4906	58.6489	70.4309	32.2728	51.9536	33.0897	22.2149	86.4977	135.675	177.565	194.97	462.38	289.117	283.338	278.869	287.42
15223	Nfib	NM_001113209	8770	52.9743	1.85661e-11	5.89602e-10	0.522691	12.0749	213.512	210.907	0.0199272	0.0186094	2.29612	0.10122	0.655543	0.0447192	0.201996	0.100749	35.9219	130.528	294.281	318.632	110.608	187.455	217.688	210.209	228.274
8517	Gas6	NM_019521	2593	52.9379	1.89015e-11	5.98878e-10	85.7486	25.3816	18.8235	9.74032	98.8719	123.678	54.7226	98.7668	81.9612	56.4913	46.286	2.72601	27.1327	25.9307	10.3396	14.0999	24.9239	6.36511	11.7054	10.007	10.8837
13417	Med13	NM_001080931	11787	52.8955	1.92986e-11	6.10066e-10	58.4154	95.1648	115.662	215.624	62.9983	61.4768	42.7102	60.2119	76.4467	46.6486	98.4797	59.9439	127.071	109.892	103.085	140.17	109.501	245.273	203.05	204.887	209.287
20760	S1pr1	NM_007901	3028	51.8388	3.24168e-11	9.73628e-10	0.122152	0	10.2416	24.1137	0	0	0	0.732912	0	0	0	0	0	0.0793054	7.73669	7.7026	25.4478	17.8712	26.0308	25.5078	27.0452
2965	Bcl11b	NM_001079883	7923	51.8111	3.28593e-11	9.84782e-10	27.9061	8.38822	76.101	47.0145	40.4534	28.6323	19.5643	29.6909	20.5835	28.5119	6.76361	5.27858	13.1225	92.5329	34.9559	125.15	51.7654	39.8871	47.0694	49.9301	51.1716
26622	Zeb2	NM_015753	9113	51.2371	4.35494e-11	1.27212e-09	1.19203	1.40381	81.9315	165.341	0	5.03241	1.90137	0.0487053	0.105145	0.064554	1.89534	0	2.31609	83.6645	42.7306	112.82	88.5112	215.286	159.328	144.684	142.068
20334	Rnf187	NM_022423	1939	51.2198	4.392e-11	1.2769e-09	676.499	605.742	524.186	293.255	742.127	622.432	652.339	746.696	673.744	621.654	495.867	692.029	629.331	645.979	473.34	493.173	484.252	286.059	323.869	277.975	285.116
18181	Pik3r1	NM_001077495	6913	51.1339	4.58112e-11	1.32422e-09	53.4329	79.4558	156.848	178.715	72.8825	55.7392	30.1453	71.6531	38.9483	51.2289	84.629	76.9005	76.8381	171.114	162.511	152.188	141.579	163.289	185.596	175.67	190.305
7439	F2r	NM_010169	3296	51.0207	4.84257e-11	1.39111e-09	55.0537	33.2256	158.288	251.078	37.9109	58.7258	56.8329	62.0799	61.0494	53.7235	63.1529	6.16567	30.3582	94.6413	196.881	159.312	182.316	277.383	246.138	237.146	243.645
24555	Top2a	NM_011623	5217	51.0132	4.86051e-11	1.39335e-09	0.523305	0.396158	39.5968	89.0012	2.2109	0	0.0897647	0.765701	0.0734663	0	1.18847	0	0	8.69961	106.524	36.732	6.43218	90.3973	87.3139	95.0254	83.2682
15183	Neurod6	NM_009717	2153	51.0024	4.88635e-11	1.39786e-09	0.620628	1.51286	113.122	53.5412	0	0	0.435023	0.618464	2.67028	0	0	0	4.53858	120.459	68.0664	173.621	90.3411	38.4553	56.281	65.1237	54.3046
22886	St18	NM_173868	5862	50.239	7.10547e-11	1.96765e-09	2.27135	8.23069	21.0413	151.525	2.11669	1.94887	3.2754	1.74148	0.163457	4.38217	22.8918	0	1.80029	3.15431	22.0244	48.0677	10.9188	151.901	151.841	159.303	143.054
5239	Crebrf	NM_029870	7451	49.8266	8.69805e-11	2.37073e-09	5.88728	8.8593	28.6599	37.9883	6.98951	6.46158	5.84514	7.62488	6.48135	1.9212	4.10126	8.10322	14.3734	24.1394	23.5808	31.6409	35.2786	40.0171	37.5462	37.9003	36.4896
5411	Ctdsp1	NM_153088	2768	49.7256	9.13997e-11	2.47656e-09	0.125918	0	10.157	10.3352	0	0.117922	0	0	0	0.637588	0	0	0	3.03641	14.1997	18.9018	4.49003	10.8502	10.3703	10.4708	9.64945
20008	Ret	NM_001080780	7341	49.6129	9.65885e-11	2.60695e-09	29.1499	26.3829	3.4223	13.2263	32.6621	35.6155	17.224	33.4959	33.5972	22.3046	35.4736	34.6237	9.05143	1.43932	1.24103	6.26844	4.74043	14.7061	16.1858	10.4801	11.5331
7111	En1	NM_010133	2554	49.0925	1.24665e-10	3.28783e-09	0.0125057	1.27533	1.32682	32.6345	0	0	0	0	0.075034	0	0	0	3.82598	0	4.07669	0.987258	0.243312	37.7145	32.1517	31.0736	29.598
26103	Vsx1	NM_054068	3566	48.9785	1.31829e-10	3.45701e-09	0	0	0	2.34972	0	0	0	0	0	0	0	0	0	0	0	0	0	3.64199	2.24335	2.38297	1.13058
19383	Ptprn	NM_008985	3535	48.4395	1.71685e-10	4.38588e-09	65.7699	53.6693	49.8729	13.5737	75.2932	102.124	46.764	44.1968	86.4128	39.8289	49.1111	65.2365	46.6602	55.7036	57.2874	37.9823	48.5182	10.4095	15.7746	14.8524	13.2582
10118	Grm5	NM_001143834	8524	48.1775	1.95213e-10	4.93234e-09	40.1707	22.3476	29.4544	9.89131	35.8995	27.1688	45.5996	53.7891	29.429	49.1384	25.3028	19.8675	21.8725	46.4836	20.0628	22.0376	29.2338	7.04674	11.3448	10.2361	10.9376
3209	Brwd3	NM_001081477	6434	48.052	2.07592e-10	5.2071e-09	18.98	50.6077	45.4271	103.703	25.804	12.0488	23.5098	10.6927	11.4077	30.4168	57.3386	52.8712	41.6134	38.5921	40.1732	39.7774	63.1657	127.715	95.0439	98.7255	93.3266
27087	Zfpm2	NM_011766	4974	47.806	2.34185e-10	5.85293e-09	33.8594	4.17543	27.6987	98.9748	36.9971	50.5953	22.7843	35.9614	33.5191	23.2994	9.79422	0.296062	2.43601	38.9124	25.1714	16.6019	30.109	75.5571	109.366	99.8813	111.095
26843	Zfp521	NM_145492	6149	47.5179	2.69686e-10	6.7039e-09	166.437	78.3949	160.643	86.4129	191.729	213.421	140.514	162.122	149.563	141.274	93.4154	68.7331	73.0364	169.099	164.712	172.328	136.431	73.7477	87.2045	93.8497	90.8498
17554	Pbxip1	NM_146131	4481	47.458	2.77711e-10	6.85417e-09	0.223861	0	6.27155	14.6938	0	0.946956	0	0.396207	0	0	0	0	0	2.25078	13.07	4.07957	5.68583	11.0498	19.6379	13.5794	14.508
20834	Satb1	NM_001163630	6326	47.1681	3.20086e-10	7.80267e-09	32.0407	25.1153	61.9863	150.681	39.6431	14.112	26.28	25.0482	48.2273	38.9335	17.9223	34.8715	22.5521	47.83	77.8504	80.6141	41.6506	114.584	166.033	149.873	172.234
23527	Tbx10	NM_001001320	1778	46.8893	3.66917e-10	8.85075e-09	0	0	0	4.22831	0	0	0	0	0	0	0	0	0	0	0	0	0	1.97829	4.76398	6.48624	3.68472
19408	Ptx3	NM_008987	1922	46.8688	3.70629e-10	8.92475e-09	0	0	10.69	6.59209	0	0	0	0	0	0	0	0	0	0	26.8152	7.21541	8.72962	7.46108	5.50881	7.10559	6.29289
3916	Ccnd1	NM_007631	3796	46.5964	4.23515e-10	1.00756e-08	6.35019	18.6698	83.7862	59.8094	10.9111	5.24524	5.79827	4.32626	9.28904	2.53124	18.3171	28.9402	8.75218	37.3237	223.611	49.818	24.3919	54.8124	61.983	64.5591	57.8832
3646	Cav1	NM_007616	2487	46.1016	5.39622e-10	1.25362e-08	0	0	3.48409	6.90563	0	0	0	0	0	0	0	0	0	2.12425	0	4.81581	6.99628	7.18037	8.04159	5.30829	7.09226
11912	Kdr	NM_010612	5447	45.9136	5.9165e-10	1.36306e-08	0	0.167434	10.2898	18.5402	0	0	0	0	0	0	0	0	0.502301	0	0	6.24925	34.9099	15.5477	20.7772	18.9158	18.9203
14746	Mybl1	NM_008651	3560	45.8483	6.10865e-10	1.40034e-08	1.93464	2.62959	1.43937	49.958	3.23996	4.12595	0.131546	3.24161	0.538306	0.330495	7.33981	0	0.548964	1.75381	1.02364	0.885343	2.09467	60.1941	47.1236	51.3201	41.1942
21413	Shh	NM_009170	2667	45.8508	6.10117e-10	1.40034e-08	2.26004	0.608879	0.310648	63.8084	2.55556	1.0403	0	9.81898	0.0718549	0.0735259	1.82664	0	0	0.0900401	0.683193	0.236357	0.233003	84.0013	56.9913	55.4744	58.7665
25563	Usp9x	NM_009481	11902	45.6132	6.85374e-10	1.5608e-08	102.481	71.1832	119.128	246.998	101.256	111.783	92.2677	115.829	105.077	88.6721	100.468	43.3296	69.7523	106.066	108.147	139.081	123.219	264.091	236.315	243.463	244.124
8009	Fgf10	NM_008002	4572	45.5314	7.13368e-10	1.61394e-08	0.0773423	1.40687	5.70727	28.7632	0	0.464054	0	0	0	0	0.484336	3.73629	0	0.945421	7.05967	10.2027	4.62123	48.3498	24.1875	24.3281	18.1874
22925	Stag2	NM_021465	5815	45.1823	8.46304e-10	1.8961e-08	17.9247	9.76587	28.2661	69.5336	12.1717	11.7036	27.3814	16.1817	15.3244	24.7857	12.7189	9.31937	7.25935	19.5744	20.0538	31.5453	41.8911	70.4458	69.2712	67.4823	70.9352
2479	Atad2	NM_027435	5683	45.0631	8.97156e-10	1.99711e-08	0.836093	0.0779301	7.32752	16.181	0.0922548	0.430769	1.8953	0.156203	1.82094	0.621095	0.23379	0	0	1.09864	6.09176	17.6364	4.48323	21.9008	15.4843	14.392	12.947
5981	Ddr2	NM_022563	8290	44.9551	9.45804e-10	2.08197e-08	0.00788475	0	1.24295	1.71164	0	0	0	0	0	0.0473085	0	0	0	0.49244	1.85253	0.228117	2.39872	1.79509	1.87322	1.35453	1.82372
11927	Khdrbs3	NM_010158	1893	44.9576	9.44679e-10	2.08197e-08	80.4979	261.294	122.375	100.812	76.0715	114.665	83.3693	101.525	60.7407	46.615	309.054	250.181	224.648	142.712	123.892	92.5733	130.324	99.3375	97.0732	104.609	102.229
22450	Son	NM_178880	8451	44.8393	1.00098e-09	2.18951e-08	172.045	182.95	240.484	493.557	152.8	154.842	168.292	176.732	187.918	191.685	205.953	140.274	202.623	187.285	229.003	272.33	273.319	555.034	459.16	474.175	485.857
26943	Zfp703	NM_001110508	3305	44.6796	1.08232e-09	2.33788e-08	34.9802	39.2246	202.189	28.8275	67.6308	49.1341	22.3878	34.2457	23.2516	13.2311	25.3264	9.08965	83.2578	136.017	318.735	116.155	237.85	13.5899	36.5924	29.7519	35.376
23538	Tbx3	NM_011535	5082	44.6618	1.09177e-09	2.35461e-08	0	0	7.64926	7.9468	0	0	0	0	0	0	0	0	0	0	0	27.7847	2.81241	11.5	8.75036	6.47942	5.05741
27142	Zmiz2	NM_028601	4203	44.6502	1.09801e-09	2.36439e-08	189.534	116.868	309.037	73.0787	306.986	229.138	138.831	142.248	102.635	217.369	150.892	75.1898	124.522	410.627	387.318	216.721	221.481	42.6809	88.2258	76.576	84.832
15182	Neurod4	NM_007501	3345	44.5065	1.17797e-09	2.5209e-08	0	0.0778998	2.30851	21.4988	0	0	0	0	0	0	0	0	0.233699	0	0	9.23404	0	24.0237	19.6249	23.5895	18.7571
1479	Aes	NM_010347	1347	44.4187	1.22967e-09	2.60976e-08	370.487	211.282	234.67	124.097	364.962	338.282	430.407	356.531	323.663	409.074	209.109	278.78	145.957	316.26	249.089	170.343	202.988	116.102	128.91	121.553	129.824
22207	Smyd2	NM_026796	1605	44.4168	1.23081e-09	2.60976e-08	125.241	162.479	48.862	47.3951	134.8	124.157	122.546	103.427	108.296	158.219	76.986	205.156	205.294	58.351	22.3807	62.4473	52.2689	44.3363	49.403	45.7595	50.0816
22509	Sp9	NM_001005343	2811	44.3801	1.25311e-09	2.64895e-08	0	0	7.41529	4.49013	0	0	0	0	0	0	0	0	0	0	22.7794	2.01824	4.86348	5.48647	3.09699	5.07432	4.30272
7975	Ferd3l	NM_033522	885	44.2318	1.3474e-09	2.83096e-08	0	0	0	7.43614	0	0	0	0	0	0	0	0	0	0	0	0	0	3.05728	8.77343	9.08749	8.82635
18059	Phip	NM_001081216	10729	44.0818	1.45002e-09	3.03278e-08	57.5551	78.139	79.8254	192.768	51.4397	45.9539	67.0874	50.8429	71.4106	58.596	109.883	51.8551	72.6787	49.2629	71.0121	115.333	83.6939	211.911	186.076	187.71	185.373
8198	Foxa1	NM_008259	3187	43.5648	1.86714e-09	3.81304e-08	0.51449	0	0	18.6392	0	0	0.440825	2.64612	0	0	0	0	0	0	0	0	0	19.0171	18.0139	17.7598	19.7661
6775	Ebf2	NM_010095	4342	43.4023	2.02152e-09	4.1041e-08	1.68958	5.30403	101.533	85.7362	0.764732	6.91607	0.539271	1.73779	0.0441356	0.135486	14.3818	0	1.53032	42.4747	134.465	74.7668	154.425	86.3679	80.4703	91.8431	84.2635
22479	Sox17	NM_011441	3130	43.0709	2.37714e-09	4.77704e-08	0.0102043	0	0.0496342	3.01423	0	0	0	0	0.0612259	0	0	0	0	0	0	0	0.198537	3.28487	3.15721	3.19971	2.41512
4537	Chek2	NM_016681	2247	42.9809	2.48407e-09	4.97029e-08	0	0	0.89185	7.48214	0	0	0	0	0	0	0	0	0	0	1.04258	2.52482	0	7.70648	6.80627	8.23888	7.17694
2577	Atp2b4	NM_213616	6284	42.9603	2.50921e-09	5.01335e-08	16.7279	6.92771	47.571	33.1201	13.0153	27.6336	17.0658	11.2305	17.5047	13.9175	9.30295	4.26504	7.21515	57.3592	44.3631	45.7425	42.819	22.6479	38.8277	32.4303	38.5746
26571	Zcchc11	NM_175472	6054	42.8513	2.64653e-09	5.27249e-08	46.2747	57.5048	83.7762	165.719	35.9107	39.3588	47.7276	38.8571	41.9107	73.8833	63.2785	44.0276	65.2083	71.9935	63.4188	111.725	87.9677	192.268	153.943	160.291	156.373
14206	Mllt11	NM_019914	2514	42.6741	2.886e-09	5.70037e-08	1920.12	1428.19	1102.5	810.92	2247.5	2153.59	2149.83	2022.22	1401.3	1546.28	1159.86	1975.43	1149.27	1274.9	985.793	994.692	1154.59	871.118	796.552	796.323	779.688
11514	Irx4	NM_018885	2601	42.5914	3.00504e-09	5.9102e-08	0	1.05192	3.02919	13.8595	0	0	0	0	0	0	0	0	3.15575	1.1079	0.400302	6.78593	3.82265	10.9226	15.7401	16.5687	12.2065
11904	Kdm5a	NM_145997	10969	42.5069	3.13182e-09	6.11611e-08	25.0374	20.537	52.7435	82.1131	32.8524	28.82	21.6455	19.8679	34.4174	12.6212	24.5482	12.2975	24.7652	48.1412	68.8888	44.9398	49.0043	82.3869	79.3873	82.3946	84.2836
13405	Mecom	NM_007963	4421	42.3019	3.46174e-09	6.72247e-08	1.93561	0	14.5676	75.2667	0	10.8163	0	0	0.043347	0.754036	0	0	0	11.298	30.7928	10.979	5.20075	63.037	71.2089	79.2185	87.6024
23767	Tfap2b	NM_009334	6021	42.1874	3.6611e-09	7.08973e-08	0.425869	8.28309	237.691	12.9195	0.0580506	0.0542117	2.41112	0	0.0318281	0	0	24.8493	0	225.978	225.495	332.09	167.198	15.4585	9.37868	15.4995	11.3413
20007	Rest	NM_011263	4266	42.1332	3.7593e-09	7.26973e-08	1.69366	0.414237	19.4154	21.3812	1.84347	2.06588	3.62259	1.14448	1.34766	0.1379	0	1.24271	0	11.033	33.4371	19.0616	14.1298	19.9788	22.8338	21.2712	21.4412
5831	Dap	NM_146057	1481	41.9984	4.01534e-09	7.72172e-08	19.1816	1.23162	74.6452	9.69979	21.5944	23.1417	12.3321	18.2815	10.6106	29.1294	0	0	3.69485	38.1041	148.339	37.0302	75.1074	7.67314	9.84998	11.578	9.698
17664	Pcgf5	NM_029508	1509	41.9521	4.10717e-09	7.85467e-08	0	7.044	2.0673	14.8026	0	0	0	0	0	0	2.9349	14.0528	4.14433	1.59136	0	6.26605	0.411809	17.9304	12.9416	13.9777	14.3606
26880	Zfp60	NM_009560	4057	41.9458	4.11986e-09	7.86807e-08	82.1454	47.2322	77.2792	227.055	75.9869	58.1694	125.704	87.1948	87.6702	58.1466	62.8782	38.2582	40.5603	69.5491	37.6619	131.294	70.6124	252.096	221.601	215.217	219.308
2480	Atad2b	NM_001099628	8103	41.9169	4.17838e-09	7.96885e-08	40.2813	23.0871	54.3338	110.514	37.8725	31.3196	30.5151	41.0273	43.0669	57.8867	26.3988	13.7756	29.0867	44.0088	35.368	69.7812	68.1775	128.223	106.973	107.754	99.1057
10843	Hoxd3	NM_010468	2902	41.8936	4.22627e-09	8.0491e-08	0.683012	11.487	250.891	66.0871	0	3.9367	0.161372	0	0	0	4.42571	0	30.0352	308.818	228.455	310.186	156.104	61.5355	82.7803	56.734	63.2984
8201	Foxb1	NM_022378	2984	41.8051	4.41296e-09	8.37012e-08	0	1.22254	10.6856	1.60632	0	0	0	0	0	0	0	0	3.66761	23.8205	6.54231	6.54869	5.83102	1.54145	1.73469	2.13581	1.01332
10734	Hmx2	NM_145998	1669	41.7452	4.54401e-09	8.6069e-08	0	0	0	3.27997	0	0	0	0	0	0	0	0	0	0	0	0	0	3.56653	2.96048	2.81849	3.77439
4168	Cdca7	NM_025866	2361	41.7294	4.57923e-09	8.66174e-08	0.0123367	0	6.96459	5.88534	0.07402	0	0	0	0	0	0	0	0	0	6.06367	14.9515	6.84325	6.87597	5.18211	5.72012	5.76316
12436	Lcorl	NM_001163073	4970	41.7265	4.5858e-09	8.66235e-08	16.1697	57.7303	37.9994	58.9817	20.5353	17.831	14.5108	11.3419	16.4646	16.3346	62.9117	63.1712	47.1079	25.4149	29.1197	39.5722	57.8908	67.6152	56.9519	55.9956	55.3642
10364	Habp4	NM_019986	2567	41.4522	5.24327e-09	9.74473e-08	61.1806	123.868	27.7438	34.9561	71.2797	71.7158	39.5877	49.4513	49.6449	85.4042	136.641	159.136	75.8276	43.7803	11.1541	25.5387	30.5021	29.1966	39.1382	34.5813	36.9083
17998	Pgr	NM_008829	6889	41.245	5.80182e-09	1.06824e-07	5.51897	33.418	2.23884	3.77758	6.06299	10.8029	5.16635	3.22145	3.50505	4.35511	7.26449	90.5499	2.4397	1.11546	3.85401	1.18954	2.79634	4.43814	3.58618	3.28202	3.80399
3036	Bex1	NM_009052	866	41.1655	6.03135e-09	1.10463e-07	392.475	598.499	256.691	205.956	267.389	385.961	325	423.863	495.689	456.948	624.425	642.1	528.973	328.039	156.298	197.99	344.436	194.648	210.292	207.64	211.242
17534	Pax5	NM_008782	1208	41.0367	6.42316e-09	1.17174e-07	0	0	16.1442	14.0286	0	0	0	0	0	0	0	0	0	60.4318	0	2.0873	2.05768	8.28731	16.9454	14.1946	16.6873
11670	Jund	NM_010592	2878	40.3787	8.85691e-09	1.58443e-07	39.4376	18.8594	45.8227	8.1967	36.0696	35.7257	51.9071	31.1529	37.7547	44.0155	13.6956	29.1657	13.7168	42.3035	44.1365	38.7681	58.0827	6.76894	8.33889	7.69792	9.98106
21507	Six5	NM_011383	2853	40.3459	8.99993e-09	1.60723e-07	0	0	4.81093	4.21088	0	0	0	0	0	0	0	0	0	0	10.8571	7.73318	0.653438	3.69864	4.20598	5.05281	3.8861
1094	Ablim2	NM_001177696	3726	40.3195	9.1163e-09	1.62451e-07	22.8761	46.4511	11.4811	7.34223	30.018	32.6321	16.4647	26.8026	17.0241	14.3149	23.7722	79.9147	35.6664	14.0499	14.5308	11.6734	5.6705	6.9712	7.4514	7.57498	7.37134
24370	Tmpo	NM_001080129	3533	40.1986	9.67074e-09	1.71229e-07	52.0096	62.4019	117.88	227.583	50.9494	17.9696	66.0104	64.9508	64.2225	47.955	73.583	42.2652	71.3575	64.8431	112.061	136.493	158.125	251.271	202.056	220.078	236.929
24958	Tshz2	NM_080455	5113	40.1677	9.81777e-09	1.73389e-07	99.5849	9.77356	173.329	88.3448	101.309	189.155	66.8611	83.9437	92.5764	63.6643	16.2841	0.576027	12.4605	297.905	125.745	100.972	168.694	77.2073	97.189	88.9451	90.0379
8233	Foxo1	NM_019739	5552	39.6774	1.24721e-08	2.15055e-07	5.04336	0.093867	26.1576	11.014	4.59567	7.81922	0.843485	2.878	0.172584	13.9512	0	0	0.281601	26.3407	10.3144	34.0615	33.9139	11.1113	11.3575	10.4679	11.1193
6735	E2f1	NM_007891	2460	39.5477	1.32869e-08	2.27405e-07	0.432231	0	11.9499	5.70124	1.06562	0.796118	0.190367	0.541282	0	0	0	0	0	7.0284	27.2994	5.89365	7.57829	4.61948	6.79082	6.7853	4.60935
5816	Dact1	NM_001190466	3761	39.5418	1.33248e-08	2.27772e-07	349.185	230.841	100.618	186.627	258.913	183.513	378.527	357.819	401.312	515.026	247.521	321.539	123.463	112.949	46.9932	114.642	127.886	208.557	170.163	181.6	186.186
2430	Ash1l	NM_138679	11270	39.0951	1.65697e-08	2.80127e-07	52.2513	58.8609	92.5289	144.259	52.0717	59.3733	39.3923	55.5306	55.6716	51.4681	78.7904	46.1514	51.641	86.6155	99.3839	93.6877	90.4284	146.424	143.114	144.917	142.579
7361	Etv5	NM_023794	3822	38.9811	1.75178e-08	2.94001e-07	0.139756	0.238622	14.4732	10.0415	0.411526	0.427013	0	0	0	0	0	0	0.715865	1.82207	40.6586	9.07118	6.34102	7.85799	11.8198	10.2036	10.2848
10425	Hbp1	NM_153198	2941	38.7268	1.98311e-08	3.31221e-07	21.9217	25.8728	76.207	125.714	19.6688	8.49039	25.7957	31.542	36.0989	9.9347	38.7009	23.6339	15.2836	52.3386	110.19	66.4444	75.855	142.047	121.204	116.917	122.69
14423	Mrpl12	NM_027204	949	38.561	2.15007e-08	3.56525e-07	169.532	244.854	84.2068	54.4742	98.7061	77.9046	192.453	147.327	216.475	284.325	162.87	334.868	236.824	66.8031	80.9141	83.0301	106.08	56.1667	55.2888	49.0889	57.3522
15332	Nkx2-2	NM_010919	2049	38.4288	2.2932e-08	3.78898e-07	0	0	1.31847	12.4073	0	0	0	0	0	0	0	0	0	5.27387	0	0	0	14.7896	12.5165	10.8865	11.4368
8754	Gli3	NM_008130	8426	38.4151	2.30858e-08	3.80984e-07	1.24649	0.231938	27.5395	10.7571	2.63407	0.116215	3.72375	0.526764	0.454871	0.0232724	0	0	0.695815	9.20534	50.0143	39.9495	10.9888	9.15171	9.49416	12.4802	11.9021
2537	Atoh8	NM_153778	2354	38.166	2.60669e-08	4.27127e-07	0	0	2.84094	0.586588	0	0	0	0	0	0	0	0	0	3.67244	2.87498	4.55233	0.263985	0.459761	0.599713	0.644621	0.642255
13142	Map3k10	NM_001081292	3690	38.1227	2.6624e-08	4.35579e-07	60.9973	11.4354	35.9593	10.3025	103.389	97.6129	39.2156	47.7531	15.9438	62.0697	16.2028	3.59174	14.5117	57.724	25.9591	37.9244	22.2296	3.88623	13.5816	12.7481	10.9942
20574	Rps6ka5	NM_153587	4406	38.1186	2.66771e-08	4.35579e-07	2.0176	1.29162	20.8853	12.5653	2.49886	1.81503	2.5509	2.41771	1.08736	1.73574	0.502584	0.267383	3.1049	9.7559	49.5072	11.3025	12.9756	10.194	12.2824	13.0873	14.6978
11166	Igf2	NM_010514	4038	37.956	2.88769e-08	4.67091e-07	0.939109	0	44.6803	104.132	5.53973	0	0	0	0.0949168	0	0	0	0	0.951508	0.322309	22.3235	155.124	120.745	107.913	89.5883	98.2826
6249	Dkk1	NM_010051	2237	37.9356	2.91658e-08	4.71212e-07	0	0	0.161022	4.22561	0	0	0	0	0	0	0	0	0	0.644086	0	0	0	6.0476	3.36576	2.64551	4.84356
1382	Adcyap1	NM_009625	2092	37.8796	2.99726e-08	4.83121e-07	100.196	99.9716	31.8355	25.9407	100.162	61.7087	85.96	112.448	72.5509	168.348	90.1843	161.34	48.3907	20.6619	14.4333	53.3339	38.913	40.094	20.582	23.574	19.5126
13320	Mbtd1	NM_134012	5231	37.7634	3.17193e-08	5.10087e-07	37.0757	49.1096	122.907	182.832	41.9948	26.8315	41.4498	45.31	39.0528	27.8152	37.5061	8.50179	101.321	105.814	131.616	148.824	105.372	192.569	171.687	185.133	181.939
4588	Chrdl1	NM_001114385	4060	37.7568	3.18216e-08	5.1114e-07	0	0	1.59915	0.749848	0	0	0	0	0	0	0	0	0	2.36588	1.85926	2.01841	0.153059	0.799713	0.347716	0.672756	1.17921
8237	Foxp1	NM_053202	2118	37.7533	3.18767e-08	5.11431e-07	24.2321	216.264	87.0994	82.2907	51.6528	42.3807	7.07539	29.5482	3.34777	11.3879	301.524	129.323	217.945	117.914	66.4875	61.0126	102.983	84.9522	86.6498	77.0183	80.5425
24913	Trps1	NM_032000	10202	37.644	3.36208e-08	5.36925e-07	2.22599	10.7379	21.0913	26.0613	3.16907	6.81484	0.872158	1.21818	0.26298	1.01872	9.85424	11.1723	11.1872	10.0744	31.8929	26.0129	16.3852	26.9456	27.2142	25.8063	24.279
6910	Egr1	NM_007913	3072	37.5787	3.47071e-08	5.52361e-07	257.097	338.928	223.14	52.9409	136.987	119.003	323.025	471.881	165.374	326.312	225.907	427.115	363.761	276.017	41.6881	196.784	378.071	46.8564	56.4476	51.1246	57.3348
17198	Olig2	NM_016967	2437	37.5084	3.59179e-08	5.68365e-07	0	0	0.665131	7.80949	0	0	0	0	0	0	0	0	0	2.66052	0	0	0	5.66231	10.041	6.84933	8.68533
5236	Creb5	NM_172728	2873	37.308	3.96014e-08	6.19572e-07	0.0094677	1.54186	10.8627	7.74572	0	0.0568062	0	0	0	0	0	0	4.62559	4.84787	28.1769	3.07174	7.35408	6.12148	8.02582	8.50357	8.33202
15579	Notch3	NM_008716	7943	37.2993	3.97693e-08	6.21496e-07	0.568042	0.222477	7.78951	14.5645	0.242021	0.657501	2.00457	0.335277	0.168886	0	0	0.667431	0	7.16511	7.7994	10.9518	5.24174	10.662	17.477	15.78	14.3389
7380	Evx2	NM_007967	1428	37.2681	4.03794e-08	6.2961e-07	0	11.7417	2.79165	2.213	0	0	0	0	0	0	16.7474	0.412496	18.0651	6.72652	1.82281	0.441432	2.17584	1.5158	2.63627	1.70021	2.99974
8377	Fzd6	NM_001162494	4079	36.9414	4.7346e-08	7.27583e-07	0.00666847	0	4.2298	9.21734	0	0.0400108	0	0	0	0	0	0	0	0	0	0.618156	16.301	11.4092	8.82545	8.10987	8.52487
17672	Pcm1	NM_023662	8381	36.8931	4.84744e-08	7.43273e-07	129.23	150.85	171.84	378.207	111.142	130.781	105.942	116.987	202.43	108.096	152.927	118.111	181.51	151.515	153.706	192.697	189.444	433.215	358.672	362.893	358.049
8418	Gabpb2	NM_029885	8685	36.8098	5.04806e-08	7.72326e-07	0.988579	0.471751	12.4061	13.1728	1.56953	2.38652	1.18626	0.766583	0	0.0225784	0.254966	0.305205	0.855081	9.56677	16.6338	11.9758	11.4481	12.0253	13.1393	13.9776	13.5491
3110	Bmpr1a	NM_009758	5481	36.6982	5.33013e-08	8.11892e-07	21.4315	30.6689	53.7475	102.411	27.3892	35.6125	21.6166	23.3222	7.48227	13.1659	29.9776	24.0196	38.0094	38.5989	82.3489	51.639	42.403	132.15	96.3301	88.0674	93.0953
2266	Arid4a	NM_001081195	5780	36.6563	5.43991e-08	8.27704e-07	21.5429	59.8892	25.9485	77.0224	19.5019	13.4121	24.0633	17.8923	24.6343	29.7533	62.6004	89.2739	27.7931	30.3703	25.7595	25.3018	22.3625	83.6051	73.8428	77.1846	73.4572
7430	Ezr	NM_009510	3070	36.6354	5.49569e-08	8.34356e-07	0.797719	0.551706	18.7765	38.9227	1.25236	2.23276	0	1.30119	0	0	0	0	1.65512	13.0628	26.6232	28.3356	7.08459	37.8092	35.4081	40.7781	41.6954
23039	Strn3	NM_052973	4164	36.4134	6.12313e-08	9.23539e-07	65.4404	103.929	95.5684	241.846	48.265	54.2446	73.6643	71.2038	81.6896	63.575	117.101	121.94	72.7469	53.1715	62.3862	149.416	117.3	308.387	222.574	228.017	208.408
20047	Rfx2	NM_027787	3352	36.3608	6.28192e-08	9.44403e-07	0.312225	0.132123	14.0463	11.349	0.938456	0.876395	0	0	0	0.0585005	0.396369	0	0	1.64772	32.6924	10.9073	10.9379	7.34541	14.3896	11.408	12.2531
12393	Lbx1	NM_010691	864	36.2134	6.74947e-08	1.00596e-06	35.6473	0	8.32778	1.18434	87.1784	46.6568	33.6051	26.7133	0.665406	19.0647	0	0	0	10.0057	0	20.4285	2.87694	0.939478	1.63394	1.58067	0.583282
2798	Bag3	NM_013863	2591	36.1288	7.03324e-08	1.04276e-06	0	0	3.36416	3.28156	0	0	0	0	0	0	0	0	0	0	9.84526	0.97316	2.63822	2.50624	4.26805	3.04542	3.30654
20629	Rsf1	NM_001081267	11128	36.1286	7.03409e-08	1.04276e-06	48.4653	57.0785	70.7985	130.445	49.611	50.2753	47.0491	46.4273	58.3969	39.0319	72.2739	37.424	61.5376	64.5012	73.2143	79.2487	66.2297	134.871	128.639	129.653	128.616
13281	Mavs	NM_144888	3023	36.0378	7.35182e-08	1.08522e-06	0.0316965	0	1.67742	6.17688	0	0	0	0	0.190179	0	0	0	0	2.78028	0	1.66818	2.2612	5.99675	6.61576	6.92711	5.16792
18881	Prdm12	NM_001123362	2471	35.9442	7.69456e-08	1.13219e-06	0.0315866	0	0.216759	3.23205	0	0	0.18952	0	0	0	0	0	0	0	0.105341	0.51021	0.251485	2.95645	4.18966	2.82486	2.95725
22475	Sox12	NM_011438	4435	35.8657	7.99419e-08	1.1713e-06	196.145	120.705	193.904	79.8695	259.325	212.368	240.856	165.831	140.865	157.627	165.567	50.3378	146.21	175.27	248.969	175.251	176.127	61.8619	91.6746	81.9109	84.0305
10459	Hdac5	NM_001077696	3798	35.8089	8.21835e-08	1.1978e-06	45.5004	26.6083	143.479	15.9221	76.9815	86.3289	16.1526	24.7753	38.0953	30.6687	35.7986	17.6807	26.3456	70.9409	392.158	60.912	49.9034	9.68864	18.709	16.7805	18.5102
23676	Tead3	NM_001098226	2448	35.3802	1.01251e-07	1.45427e-06	0.055164	0	4.79528	1.75548	0.0713894	0	0	0.181312	0.0782831	0	0	0	0	3.72761	0.425321	3.60502	11.4232	1.98948	2.0184	2.29351	0.720525
22494	Sox9	NM_011448	4146	35.2108	1.09948e-07	1.56942e-06	0.484273	1.57124	39.5776	52.8914	0	0	0.338859	2.14111	0	0.425674	0	0	4.71373	14.3063	71.5722	55.4952	16.9369	53.8398	54.8777	50.3983	52.4498
18748	Ppp1r12a	NM_027892	3403	35.1938	1.10862e-07	1.57921e-06	57.8784	38.0565	109.729	167.594	61.5234	92.9923	54.2202	28.3032	69.4916	40.74	45.5501	28.9935	39.6261	113.612	127.739	88.7289	108.835	163.471	163.381	172.033	171.49
1101	Ablim3	NM_198649	4532	35.1224	1.14781e-07	1.63e-06	194.789	172.484	100.894	58.2342	331.939	310.635	135.882	124.674	158.993	106.614	203.36	122.371	191.723	198.118	72.0238	59.2531	74.1809	44.0004	70.1398	58.193	60.6037
10412	Havcr2	NM_134250	2724	34.9172	1.26829e-07	1.78101e-06	0	0	0.255383	2.90805	0	0	0	0	0	0	0	0	0	0.793404	0	0	0.228128	1.7879	2.24577	3.62091	3.97763
10190	Gsx2	NM_133256	1665	34.8747	1.29483e-07	1.81277e-06	0	0	6.06245	0.0634104	0	0	0	0	0	0	0	0	0	2.88453	2.81402	18.5513	0	0.162504	0	0.0911375	0
10939	Hsf1	NM_008296	2018	34.846	1.31302e-07	1.83267e-06	58.6247	154.749	69.5294	37.1545	61.6601	74.4043	58.9439	30.5725	35.9913	90.1759	84.4933	213.376	166.378	59.4987	76.7475	80.5917	61.2797	27.3519	41.1578	39.4023	40.7061
8244	Foxq1	NM_008239	2805	34.8237	1.32731e-07	1.8489e-06	0.0263726	0	8.08375	4.09781	0	0	0	0.158236	0	0	0	0	0	11.7286	0	0.224729	20.3817	3.47255	4.27795	4.5983	4.04243
12533	Lhx4	NM_010712	1851	34.4897	1.56146e-07	2.14483e-06	0	0.319018	0.681107	13.4264	0	0	0	0	0	0	0.957054	0	0	0	0	2.72443	0	14.0328	14.1096	14.2644	11.2988
18048	Phf21b	NM_001081166	3727	34.4013	1.63001e-07	2.23016e-06	16.2545	27.7543	92.7557	83.2774	20.3974	6.56845	19.8529	16.3154	14.2944	20.0987	41.9467	4.82046	36.4959	44.329	160.774	71.8822	94.0383	75.6462	85.4787	88.7582	83.2264
12755	Lrp5	NM_008513	5172	34.306	1.70734e-07	2.32218e-06	0.469685	0.0251909	6.68492	3.97249	0.912327	0.536441	1.08655	0.171636	0.111158	0	0	0	0.0755727	14.8112	3.32165	5.36273	3.24407	3.13886	4.13982	4.66498	3.94629
8372	Fzd2	NM_020510	3628	34.2543	1.75082e-07	2.37433e-06	0.451154	0.0270601	8.15477	17.4862	0.770722	0	1.9362	0	0	0	0	0.0811804	0	3.04473	11.5512	14.7687	3.2544	16.3326	18.0941	18.7798	16.7383
21851	Slc38a3	NM_023805	2585	34.24	1.76299e-07	2.38849e-06	0.0412601	0.806421	14.2654	11.9865	0	0	0	0.171703	0	0.0758583	0	0	2.41926	0.0928963	7.25004	13.8997	35.8188	5.7568	15.2914	14.3232	12.5745
2964	Bcl11a	NM_016707	3425	34.0944	1.89233e-07	2.55123e-06	63.4142	60.5204	175.982	55.9044	89.039	73.5729	70.4163	58.4458	40.1738	48.8373	41.8955	32.8489	106.817	225.553	202.613	139.14	136.622	43.6071	61.5526	58.7924	59.6654
18039	Phf14	NM_001168382	3363	34.0658	1.91885e-07	2.58447e-06	97.4569	159.351	118.317	300.881	89.5372	76.8705	114.047	72.7214	142.061	89.5045	189.503	191.619	96.931	114.249	91.2548	131.396	136.369	319.567	292.028	301.141	290.79
1093	Ablim1	NM_178688	6621	33.9089	2.07093e-07	2.7785e-06	110.734	114.009	64.5551	62.0309	101.806	147.527	66.3446	99.8179	105.413	143.494	145.953	106.048	90.0264	50.4501	57.5554	62.7413	87.4737	58.9687	67.4839	60.5509	61.1202
2534	Atn1	NM_007881	4396	33.8692	2.11119e-07	2.82977e-06	151.696	139.992	273.583	81.387	228.51	209.611	113.773	114.598	142.115	101.571	166.129	85.6232	168.224	400.465	302.929	154.723	236.213	63.3955	92.702	81.6366	87.814
24957	Tshz1	NM_001081300	5814	33.8139	2.16877e-07	2.89573e-06	1.70602	53.4643	145.175	43.1613	0.180352	9.68446	0	0.305367	0.0659226	0	69.0138	35.9161	55.4629	152.409	134.939	102.567	190.787	42.3492	46.9037	41.9162	41.4762
7244	Erbb2ip	NM_001005868	6592	33.8041	2.17914e-07	2.90398e-06	49.0142	68.0614	100.18	177.72	37.9109	34.3887	57.6143	47.4689	67.6195	49.0829	106.89	49.5041	47.7905	68.7042	65.627	131.772	134.616	215.938	160.618	164.911	169.412
18928	Prkaa2	NM_178143	8201	33.6269	2.37508e-07	3.14994e-06	76.2645	80.1049	40.9167	51.3694	85.7292	83.3832	54.0767	81.886	92.1848	60.3273	69.5016	101.706	69.1075	40.9061	39.3254	48.6551	34.7801	48.0367	52.1299	51.05	54.2608
2269	Arid5a	NM_001172205	5699	33.6157	2.38802e-07	3.16104e-06	0	0	1.02218	0.570548	0	0	0	0	0	0	0	0	0	1.81188	0.0913482	0.331829	1.85368	0.189907	0.578001	0.585781	0.928503
489	4632428N05Rik	NM_001159572	4843	33.2858	2.80314e-07	3.61718e-06	0	0	0.55133	1.30692	0	0	0	0	0	0	0	0	0	1.04127	0	0.650799	0.513252	0.893891	1.74899	1.12797	1.45682
10531	Hexb	NM_010422	1904	33.1576	2.98331e-07	3.81153e-06	7.31506	4.77741	28.7321	56.4509	8.44435	8.14307	8.36255	5.82788	11.8767	1.23588	4.65207	6.80619	2.87399	20.3057	45.1144	15.8915	33.6167	56.9845	60.3048	56.107	52.4072
26828	Zfp488	NM_001013777	4299	33.1199	3.03846e-07	3.86677e-06	0	0	5.00361	2.44003	0	0	0	0	0	0	0	0	0	0	0	4.69217	15.3223	2.70632	2.1345	2.04725	2.87204
13219	Mapre3	NM_133350	1906	33.0878	3.0862e-07	3.92033e-06	152.44	214.707	205.179	54.4568	169.077	257.137	103.439	106.422	76.9162	201.649	115.715	196.4	332.007	315.983	201.3	153.457	149.975	47.6975	59.6243	53.2616	57.2437
8121	Fli1	NM_008026	3087	33.0526	3.13936e-07	3.98055e-06	0.00943534	0	7.61074	6.84008	0.056612	0	0	0	0	0	0	0	0	0	0	3.26719	27.1758	6.13536	7.6981	7.07843	6.44842
5292	Crtc1	NM_001004062	5674	33.049	3.1449e-07	3.98392e-06	66.5454	55.2728	125.094	24.4044	111.405	101.506	73.7861	34.4974	41.3401	36.7373	67.8287	29.1719	68.8177	234.339	107.44	62.5476	96.0495	15.8794	27.576	26.8507	27.3117
23997	Tlr3	NM_126166	4327	32.8702	3.43021e-07	4.29427e-06	0	0	1.58183	3.91395	0	0	0	0	0	0	0	0	0	0	0	0.582726	5.74458	5.62775	3.58886	2.77046	3.66873
1524	Ago1	NM_153403	7062	32.7601	3.61869e-07	4.50174e-06	69.7503	40.6279	131.635	139.427	71.617	71.9883	74.2043	51.5375	68.5736	80.5811	52.0515	23.2298	46.6024	88.5466	192.735	131.393	113.865	123.714	144.364	145.62	144.008
6659	Dvl1	NM_010091	3348	32.7528	3.6314e-07	4.5135e-06	42.7708	107.931	34.5796	24.5809	39.6188	32.1729	36.5075	37.3853	50.0271	60.9132	45.5047	224.587	53.7027	43.4656	19.048	44.6226	31.1823	21.012	26.7756	25.9252	24.6108
4663	Cited2	NM_010828	1968	32.6937	3.73723e-07	4.63256e-06	180.063	93.9286	359.043	132.939	150.075	138.574	290.31	247.411	136.035	117.975	125.572	54.9236	101.291	404.987	368.886	254.964	407.333	187.941	119.198	115.658	108.96
8213	Foxf2	NM_010225	2366	32.6338	3.84747e-07	4.75641e-06	0	0	5.32046	8.60311	0	0	0	0	0	0	0	0	0	0	0	0.532852	20.749	11.6645	9.34786	6.47766	6.92247
11005	Htra3	NM_030127	2740	32.323	4.4741e-07	5.42456e-06	0	0.700413	15.5159	5.87275	0	0	0	0	0	0	2.10124	0	0	0.964053	0	6.44168	54.6577	5.82613	6.18274	6.42419	5.05795
6362	Dnajb1	NM_018808	2263	32.3007	4.52275e-07	5.47395e-06	220.288	482.485	197.255	193.322	145.184	148.42	178.381	206.725	362.611	280.406	513.721	539.589	394.144	163.522	237.752	155.432	232.312	245.701	162.403	178.566	186.617
11381	Ino80b	NM_023547	1038	32.3011	4.52191e-07	5.47395e-06	12.7095	0	21.7072	6.1114	25.7596	12.4211	15.7906	6.84164	2.03083	13.413	0	0	0	28.9182	26.5814	13.9676	17.3614	4.17063	5.44017	7.30944	7.52535
26773	Zfp385a	NM_013866	2291	32.2483	4.63925e-07	5.60026e-06	118.226	82.811	108.199	15.9595	96.6489	133.926	99.5475	74.395	56.9641	247.877	94.5293	12.47	141.434	191.292	106.118	59.7071	75.677	7.55847	22.7996	18.0821	15.398
11895	Kdm3a	NM_001038695	4816	32.1926	4.76654e-07	5.71903e-06	36.1918	37.9185	80.7786	122.928	48.1537	20.1972	32.3806	32.9018	46.994	36.5233	30.7145	42.3804	40.6607	48.3166	105.502	82.1987	87.0968	123.936	119.256	121.275	127.245
1489	Afap1l2	NM_001177796	3969	32.1292	4.91546e-07	5.88749e-06	0	1.16256	4.05015	3.4685	0	0	0	0	0	0	0	3.48767	0	1.21006	5.70567	3.33526	5.9496	3.27219	3.794	4.01439	2.79341
3897	Ccl3	NM_011337	790	32.1016	4.98178e-07	5.95663e-06	0	0	14.274	7.18908	0	0	0	0	0	0	0	0	0	0	1.97694	3.98965	51.1295	6.84986	7.14798	6.14659	8.61191
22108	Smarcd1	NM_031842	3153	32.0184	5.18707e-07	6.16482e-06	196.933	107.421	295.433	79.9877	277.523	309.12	226.799	167.799	59.9891	140.369	117.988	75.4755	128.8	459.177	337.651	207.722	177.182	69.1656	81.7872	88.6015	80.3964
12516	Lgr4	NM_172671	5060	31.9789	5.2873e-07	6.27855e-06	22.4347	44.246	27.894	75.6229	19.3757	27.9318	14.7154	24.2101	27.8745	20.5007	61.5301	42.7814	28.4263	21.0238	23.7148	36.6259	30.2113	76.2514	74.6782	77.7612	73.8007
23727	Tet2	NM_001040400	9181	31.9522	5.35625e-07	6.34954e-06	32.684	40.2302	71.2595	98.643	30.0945	27.7133	44.2238	22.4319	31.9778	39.663	41.6297	32.5287	46.5322	46.6359	101.159	69.9642	67.2793	92.8029	99.5891	102.937	99.2433
26764	Zfp366	NM_001004149	2758	31.933	5.40645e-07	6.39263e-06	0	0	1.42579	2.46114	0	0	0	0	0	0	0	0	0	0	1.41568	0.457117	3.83036	1.37345	2.30339	2.69596	3.47178
11553	Itga3	NM_013565	4853	31.8937	5.5105e-07	6.48244e-06	46.0333	66.2198	23.4881	9.30538	71.8059	91.9432	25.2824	25.3342	9.91157	51.9226	84.0489	13.2908	101.32	31.1738	23.0099	23.2506	16.5183	6.35585	10.8602	9.88071	10.1248
15271	Nhlh2	NM_178777	3353	31.8769	5.55566e-07	6.52449e-06	17.2203	28.6517	111.416	76.0168	13.7599	9.58879	19.9723	23.8274	11.2593	24.9138	24.8317	14.8447	46.2786	21.5572	55.4285	225.6	143.077	81.2596	60.9797	81.8684	79.9596
18897	Prdx5	NM_012021	688	31.8388	5.65919e-07	6.63481e-06	413.06	244.003	224.314	111.134	332.25	198.075	426.101	581.265	350.963	589.706	243.325	114.299	374.387	230.713	167.604	216.23	282.71	46.0126	131.665	122.189	144.668
21428	Shox2	NM_013665	1592	31.7813	5.81934e-07	6.78808e-06	6.70138	0	69.368	96.9202	26.8948	5.22828	0	8.08523	0	0	0	0	0	54.4531	1.30802	192.435	29.2754	80.729	115.722	94.3633	96.8659
8112	Fkbp8	NM_001111066	1704	31.6906	6.08113e-07	7.04597e-06	162.692	153.468	171.008	42.6794	172.71	227.088	137.688	90.1247	75.4627	273.081	131.771	108.199	220.433	291.434	147.715	141.314	103.57	28.5813	54.6795	41.3199	46.1368
11052	Id2	NM_010496	1272	31.6073	6.3319e-07	7.30595e-06	456.677	86.0324	153.319	153.476	251.288	161.023	549.667	647.283	622.067	508.733	29.5947	189.17	39.332	93.2607	135.469	245.802	138.745	172.084	163.887	141.246	136.686
11675	Kank2	NM_145611	4853	31.3055	7.33027e-07	8.33291e-06	0.24055	0.0805403	9.00203	8.72289	1.26038	0	0	0.182918	0	0	0	0	0.241621	7.57077	13.7845	3.89675	10.7561	9.31076	10.4238	7.31673	7.84024
12168	Kmt2c	NM_001081383	16820	31.2999	7.35001e-07	8.3485e-06	53.4644	60.8946	103.072	140.768	64.9485	60.9736	51.8697	34.2256	58.2886	50.4807	70.4864	42.0421	70.1554	79.0367	92.868	113.068	127.313	137.955	139.844	141.306	143.966
26940	Zfp697	NM_172863	5164	31.0538	8.28166e-07	9.33778e-06	48.2962	11.7867	46.1309	23.2769	47.7852	62.4499	30.1078	62.2286	56.3332	30.8722	14.8369	6.44482	14.0783	44.1305	19.9608	40.649	79.7833	21.3773	24.8319	23.0378	23.8608
20048	Rfx3	NM_001166414	9146	30.9942	8.52428e-07	9.58013e-06	27.3369	49.099	77.5606	119.925	23.4072	16.0599	22.2221	24.5074	17.6844	60.1402	44.2586	69.1062	33.9323	54.4548	69.2436	98.3523	88.1918	121.085	114.994	121.68	121.939
11163	Igf1r	NM_010513	11978	30.9851	8.5622e-07	9.61494e-06	68.441	67.2032	164.96	143.792	81.0485	87.8016	56.6514	56.8432	68.956	59.3454	61.8948	77.3558	62.3591	139.515	226.222	142.092	152.009	141.18	145.773	142.787	145.427
24922	Trrap	NM_001081362	12476	30.9421	8.74247e-07	9.78563e-06	56.6412	32.413	96.8347	88.4776	69.1985	70.1035	53.6769	53.5781	47.0644	46.2257	42.314	19.5231	35.4019	84.5753	109.973	96.8081	95.9823	72.8473	94.8618	90.4674	95.7339
25406	Uhrf1	NM_001111079	3546	30.8681	9.06197e-07	1.00943e-05	0.450239	0.0367421	11.239	6.93184	0	0	1.45272	0.751017	0	0.4977	0	0	0.110226	2.23478	15.562	12.0882	15.0711	7.01985	6.56894	7.10363	7.03492
3625	Casp8ap2	NM_011997	6804	30.728	9.69837e-07	1.07513e-05	26.25	17.0911	36.8235	94.9633	22.8854	14.7037	25.2597	11.8073	30.3622	52.4818	25.3203	6.53629	19.4167	27.9877	42.5029	38.1702	38.6332	106.335	86.3827	91.7734	95.362
10723	Hmgn5	NM_016710	1907	30.7056	9.8045e-07	1.08516e-05	1.84173	5.20531	20.2227	66.1441	0.366568	0.342327	0	2.79298	2.61277	4.93576	6.96712	8.6488	0	12.7183	38.2187	21.1554	8.79828	98.4663	58.606	57.6897	49.8142
2648	Atrx	NM_009530	10242	30.6695	9.97761e-07	1.09904e-05	160.26	225.542	258.985	441.755	154.951	165.037	131.913	144.917	210.217	154.528	280.852	185.766	210.009	230.524	262.864	257.205	285.348	529.278	418.519	418.325	400.896
17310	Otp	NM_011021	1182	30.6068	1.02853e-06	1.13025e-05	0	12.6709	1.99989	16.9652	0	0	0	0	0	0	20.2329	1.24586	16.5339	0	0	7.99955	0	5.26489	21.2993	18.4866	22.8102
23344	Taf2	NM_001081288	5033	30.5548	1.05477e-06	1.15267e-05	69.62	27.0468	76.9092	119.717	93.3357	74.4844	75.3676	82.9851	35.7154	55.8319	35.8138	15.0392	30.2874	80.5864	51.9249	90.3025	84.8232	115.044	122.015	120.901	120.907
26793	Zfp414	NR_034153	1205	30.5347	1.06513e-06	1.16215e-05	117.784	42.6287	223.24	49.3581	161.854	132.46	127.472	104.977	29.7395	150.203	33.813	18.8201	75.2531	351.337	171.083	164.261	206.28	28.741	60.5304	59.4383	48.7227
3115	Bmyc	NM_023326	841	30.3735	1.15165e-06	1.24771e-05	428.67	126.606	382.594	69.4999	947.784	716.662	261.715	332.493	180.927	132.439	54.2405	77.3953	248.181	665.587	518.427	143.162	203.199	51.1541	82.5325	70.0079	74.305
22443	Sod2	NM_013671	3824	30.3392	1.17093e-06	1.26661e-05	111.433	106.964	63.4051	49.0648	82.4449	121.934	124.668	113.865	129.946	95.7392	127.281	151.805	41.8051	58.6527	68.818	60.4978	65.6521	45.9912	48.1158	47.6581	54.4942
6756	E4f1	NM_007893	2574	30.3355	1.17304e-06	1.26791e-05	26.6517	87.711	22.5082	21.1479	19.0106	9.70095	29.2917	20.5199	38.2678	43.1193	59.532	91.08	112.521	11.6617	13.3485	39.6733	25.3493	17.3442	21.9382	22.402	22.9071
5876	Dbx1	NM_001005232	2077	30.3204	1.18163e-06	1.2752e-05	0	0	1.59336	7.94309	0	0	0	0	0	0	0	0	0	0	0	6.37345	0	7.29509	7.02351	8.84016	8.61359
18658	Pou4f2	NM_138944	3212	30.1204	1.30187e-06	1.3898e-05	16.5855	1.33097	37.709	5.88494	12.242	34.1956	35.8663	8.15293	1.73022	7.32604	0.827291	0.366778	2.79883	31.6993	15.7215	34.5405	68.8747	9.01337	4.90793	4.44082	5.17763
24870	Trp53inp1	NM_021897	5392	30.0877	1.32264e-06	1.40895e-05	12.228	7.55423	33.6438	56.9695	11.1819	8.74741	15.1121	8.80788	27.0822	2.43662	7.80291	3.76893	11.0909	18.3042	45.7643	38.8132	31.6933	55.248	58.8655	56.1441	57.6203
22486	Sox4	NM_009238	2953	30.0322	1.35872e-06	1.44381e-05	152.271	99.7519	299.109	116.314	226.426	164.31	134.639	139.183	63.4031	185.668	105.283	63.3328	130.64	302.184	329.139	228.835	336.278	93.6411	129.396	121.22	120.997
14877	N4bp2l2	NM_201369	8981	29.9864	1.38921e-06	1.47056e-05	21.9121	64.8972	43.4934	47.1262	17.8634	17.8269	19.9189	24.0681	29.8519	21.9434	50.5948	99.9232	44.1738	31.9523	35.881	53.5539	52.5864	46.0339	46.7379	46.8022	48.931
11907	Kdm5d	NM_011419	5471	29.9092	1.44211e-06	1.51844e-05	9.94799	0	28.0519	40.1151	18.016	11.0374	0.171195	22.1479	0	8.31543	0	0	0	36.1676	27.8804	0	48.1597	50.4938	43.5654	14.0344	52.3668
10540	Heyl	NM_013905	4532	29.8543	1.48095e-06	1.55456e-05	0.0163229	0	7.25948	4.69264	0	0	0	0.0979372	0	0	0	0	0	0.105974	0	0	28.9319	4.83586	5.71086	4.72107	3.50278
18110	Pias2	NM_008602	4968	29.7149	1.58441e-06	1.6507e-05	37.7724	31.1906	80.3882	94.0028	37.3936	32.5554	42.4187	45.4751	32.5567	36.2347	33.6971	34.1475	25.727	67.3814	99.2355	93.8948	61.0412	96.9977	90.5061	96.8559	91.6514
19270	Psrc1	NM_001190161	1742	29.6979	1.5975e-06	1.66059e-05	0.282465	0	10.815	6.11169	0.100322	0	0.806491	0	0	0.787977	0	0	0	2.20562	24.0573	16.2838	0.713455	6.52349	6.61831	6.09763	5.20735
5277	Crlf3	NM_018776	2354	29.6628	1.62489e-06	1.68148e-05	1.20935	0	6.04895	8.50768	1.63328	0.346653	1.79045	1.31986	0	2.16586	0	0	0	6.22275	5.74997	5.62347	6.59961	6.20678	8.69584	8.63793	10.4902
1967	Anxa3	NM_013470	1597	29.5903	1.6829e-06	1.72832e-05	0.0182385	0	9.3778	10.1691	0.109431	0	0	0	0	0	0	0	0	0.150367	0	0.394718	36.9661	10.6737	9.57651	11.1171	9.30914
10555	Hhex	NM_008245	1771	29.4984	1.75946e-06	1.79657e-05	0.0180347	0	5.09407	7.48619	0	0	0	0	0.108208	0	0	0	0	5.28816	0	0	15.0881	9.625	6.37708	7.54007	6.4026
26522	Zbtb44	NM_001115130	8863	29.4738	1.78051e-06	1.81405e-05	17.6024	14.3531	28.8425	54.1408	10.5097	16.3886	22.1391	14.8234	16.9734	24.78	15.6903	15.1531	12.2158	20.7542	30.6318	27.5247	36.4592	55.8357	52.1121	52.6644	55.9509
6309	Dmd	NM_007868	13852	29.4615	1.79118e-06	1.82358e-05	9.92046	33.8104	20.1543	35.6828	14.1429	11.3932	7.47148	4.55002	7.53986	14.4253	28.4871	33.8918	39.0524	12.7939	7.83596	25.848	34.1395	37.6985	34.0905	34.2333	36.7089
4866	Cmklr1	NM_008153	2845	29.4286	1.81995e-06	1.85015e-05	0	0	2.03306	2.06635	0	0	0	0	0	0	0	0	0	0.25322	0	1.10785	6.77118	2.37759	2.97728	1.49344	1.4171
7264	Erg	NM_133659	2214	29.4263	1.82197e-06	1.85084e-05	0	0	2.5993	5.24986	0	0	0	0	0	0	0	0	0	0	0	0.854152	9.54303	6.23263	3.93209	6.16845	4.66626
10586	Hipk1	NM_010432	8049	29.4123	1.83438e-06	1.86072e-05	43.6038	47.5917	87.7182	123.413	28.7469	46.5342	49.2215	41.6335	62.4266	33.0599	40.8818	54.8868	47.0064	87.5937	93.7508	97.0333	72.4951	113.519	123.154	127.971	129.01
10420	Hbb-bh1	NM_008219	610	29.4003	1.84506e-06	1.86881e-05	0	0	24.0243	9.85605	0	0	0	0	0	0	0	0	0	0	0	23.7678	72.3292	6.65335	10.4144	13.6818	8.67465
25661	Vgll3	NM_028572	3331	29.3802	1.8631e-06	1.88433e-05	0.457292	0	16.3352	8.2823	0	2.74375	0	0	0	0	0	0	0	16.0764	34.9302	10.976	3.35802	9.25996	7.98183	8.70102	7.1864
3159	Brca1	NM_009764	6648	29.2693	1.96582e-06	1.97811e-05	1.07558	0.019598	5.48944	7.98591	0.315454	0.368241	2.53594	0.667646	0	2.56621	0	0	0.058794	5.1654	12.9209	2.74978	1.1217	8.18058	7.50315	8.1487	8.1112
7243	Erbb2	NM_001003817	4998	29.0735	2.16119e-06	2.15124e-05	0.135163	0	4.93793	7.22142	0.734291	0	0	0	0.0766855	0	0	0	0	0	4.79138	11.6033	3.35701	4.81807	9.32111	6.83121	7.91527
15569	Nos1	NM_008712	4386	29.0527	2.18303e-06	2.17142e-05	0.147387	1.03969	8.36081	6.88192	0.239072	0.0744205	0	0.303592	0.0436929	0.223545	0	0	3.11906	7.3366	6.17211	16.9592	2.97533	4.37995	8.36864	7.02326	7.75582
18878	Prdm1	NM_007548	5143	28.9395	2.30596e-06	2.28222e-05	0	0	1.3365	1.73752	0	0	0	0	0	0	0	0	0	0	0	2.08365	3.26236	1.36784	2.05871	1.56376	1.95977
13101	Maml3	NM_001004176	6510	28.8511	2.4067e-06	2.37513e-05	7.76517	31.1518	48.8931	47.3233	9.18101	3.61005	15.3223	9.06793	3.38529	6.02438	33.5389	2.3978	57.5186	52.1588	54.4584	46.3816	42.5734	38.1956	51.6837	50.7212	48.6925
26079	Vps72	NM_009336	1436	28.7741	2.49805e-06	2.45828e-05	83.2615	21.9401	177.72	37.7557	145.918	93.3083	76.3112	61.1995	14.6797	108.152	13.8784	19.2793	32.6626	274.92	249.058	118.962	67.9407	18.0882	37.8492	42.2685	52.8171
10526	Hes5	NM_010419	1273	28.7393	2.54045e-06	2.49292e-05	0.0770203	0.33428	13.7271	27.5894	0	0	0	0	0	0.462122	0.6958	0	0.30704	0	10.8372	44.071	0	16.366	28.4637	35.0453	30.4828
15765	Nrg1	NM_178591	2103	28.7058	2.58189e-06	2.53e-05	159.485	74.991	126.266	56.7765	164.789	152.883	187.277	120.724	142.976	188.261	49.4893	116.38	59.1033	155.067	76.9874	123.195	149.814	61.4989	75.1846	47.7672	42.6553
19211	Psip1	NM_133948	3181	28.5834	2.73944e-06	2.67115e-05	191.88	171.042	304.483	483.05	152.566	149.352	201.248	209.158	244.652	194.306	247.682	125.735	139.708	293.056	320.523	325.388	278.965	581.287	468.208	461.528	421.178
17960	Pfn1	NM_011072	868	28.5676	2.76043e-06	2.68972e-05	580.295	355.242	620.543	219.987	867.364	901.008	512.004	539.985	245.728	415.682	276.033	235.822	553.872	721.517	573.073	495.286	692.296	147.753	258.057	244.224	229.915
4532	Chd9	NM_177224	11517	28.5236	2.81975e-06	2.73789e-05	61.7581	64.5027	72.4417	146.523	58.709	73.8011	52.6978	57.8853	71.217	56.2384	90.0597	43.0391	60.4094	71.7262	58.3108	81.1149	78.6149	162.971	140.739	143.035	139.346
22770	Srf	NM_020493	4093	28.1211	3.42554e-06	3.26199e-05	24.2374	19.5295	61.9368	11.0478	41.2886	19.5781	21.5101	26.3513	14.5144	22.1821	9.4137	9.06666	40.108	109.185	58.6987	32.3422	47.5212	7.86655	12.2444	12.5681	11.5123
12609	Litaf	NM_019980	2235	28.1047	3.45277e-06	3.28345e-05	0.273675	1.32103	21.3668	26.381	1.64205	0	0	0	0	0	3.9631	0	0	18.5878	26.4373	28.4863	11.9557	28.9334	24.95	25.9356	25.7051
11373	Inha	NM_010564	1463	28.0885	3.47991e-06	3.30472e-05	90.0488	47.9868	84.5482	19.9153	63.7885	81.7694	151.406	78.2732	95.491	69.5643	20.2821	81.7335	41.9449	114.898	47.8604	90.4829	84.9514	15.72	20.4248	21.4703	22.0459
6640	Dusp26	NM_025869	1747	28.0846	3.48653e-06	3.30874e-05	108.422	194.394	51.2761	61.3462	89.5314	117.896	76.1293	63.5162	224.436	79.0211	166.808	240.743	175.631	67.6287	12.9627	51.2374	73.2756	65.5128	59.6636	63.6682	56.54
18044	Phf20l1	NM_001081409	6670	27.9289	3.75908e-06	3.53588e-05	20.1562	24.9113	36.2373	73.7942	17.8953	17.2258	20.9227	20.0964	30.6562	14.1411	35.7223	12.2313	26.7802	18.5053	29.8541	50.845	45.7447	76.9927	69.9513	76.1904	72.0423
25166	Twsg1	NM_023053	4046	27.9124	3.78908e-06	3.55927e-05	31.4532	36.3692	80.7368	126.951	29.1989	26.9452	42.9412	60.226	15.0619	14.3459	50.7896	13.9763	44.3415	55.5532	107.438	80.7041	79.2517	121.709	132.24	127.553	126.3
26886	Zfp606	NM_026112	4736	27.7505	4.09751e-06	3.83201e-05	29.578	46.8045	37.5213	92.6465	32.1035	27.1548	38.9593	20.1495	31.3595	27.7413	62.8406	38.6188	38.9542	22.2086	34.021	48.981	44.8745	108.433	93.5983	87.3104	81.2437
27162	Znhit1	NM_027318	1032	27.7254	4.14739e-06	3.86439e-05	143.056	52.6144	92.1987	33.6054	287.035	136.636	130.689	100.211	46.0523	157.711	77.6751	33.9614	46.2066	128.678	101.899	65.3575	72.8602	22.5475	34.8827	34.9952	41.9963
19724	Rapgef3	NM_001177810	3825	27.6231	4.35763e-06	4.04395e-05	0	0.0771898	1.94985	1.08722	0	0	0	0	0	0	0.231569	0	0	1.75786	0	2.14241	3.8991	0.707371	1.29177	1.22982	1.1199
22923	Stag1	NM_009282	6010	27.4327	4.77741e-06	4.38063e-05	64.8072	95.2887	95.2452	201.547	69.352	60.6381	65.765	52.3612	41.9624	98.7646	127.557	44.4969	113.812	65.1286	85.1053	114.011	116.736	242.432	184.511	190.955	188.292
6008	Ddx3x	NM_010028	4571	27.3706	4.92268e-06	4.49897e-05	222.428	299.136	235.596	530.263	216.932	223.58	221.704	164.587	300.347	207.419	345.213	210.244	341.951	253.586	267.244	228.371	193.183	567.361	474.127	552.732	526.833
15914	Numa1	NM_133947	7152	27.3426	4.98978e-06	4.55729e-05	22.7837	15.5393	60.0828	53.5326	24.7041	29.3229	19.709	16.1976	25.0532	21.7151	20.5586	3.87096	22.1882	56.5087	69.8783	57.5542	56.39	37.68	59.0193	60.426	57.0051
9732	Gmeb1	NM_001122992	6581	27.3385	4.99957e-06	4.56322e-05	41.619	24.5639	90.5734	49.3047	41.2406	51.0618	33.0182	47.0087	21.6942	55.6905	24.8996	19.3335	29.4587	106.294	115.415	65.4215	75.1633	45.1018	51.4837	48.7905	51.8429
6906	Egfr	NM_207655	5965	27.3351	5.0079e-06	4.56781e-05	3.43483	0.0931812	2.43391	7.62941	2.05085	5.25318	5.5741	0.669683	5.94348	1.11772	0.148492	0	0.131052	1.97262	2.70551	4.01573	1.04178	5.2617	9.42728	8.14049	7.68818
23585	Tcf3	NM_001164147	3320	27.3103	5.06834e-06	4.61382e-05	27.4621	34.5883	108.133	38.844	23.3717	55.6959	31.5963	17.6471	24.5896	11.8719	31.4816	30.9603	41.3231	77.2488	180.64	119.427	55.2165	37.3256	40.3249	39.17	38.5557
2852	Bbx	NM_027444	8741	27.1258	5.54036e-06	4.99278e-05	9.41601	16.7437	22.7418	45.6884	7.53747	4.64911	7.01838	7.46438	19.7315	10.0952	22.5973	9.43442	18.1994	11.9231	31.7144	23.7982	23.5316	51.1361	44.2258	43.834	43.5578
26497	Zbtb20	NM_019778	3127	27.1225	5.54935e-06	4.99586e-05	20.5142	23.9904	67.1517	110.805	35.377	13.5699	22.6139	11.9231	17.5274	22.0739	13.7381	3.48492	54.7482	65.7362	51.3601	89.7065	61.8041	86.4404	123.325	117.581	115.876
24739	Trim21	NM_001082552	2706	27.0242	5.81905e-06	5.2183e-05	0	0	0.66099	2.07385	0	0	0	0	0	0	0	0	0	0	0.577155	0	2.06681	1.39984	2.43461	2.69169	1.76925
10800	Hopx	NM_001159901	1233	26.8804	6.23712e-06	5.53585e-05	0.151544	4.01535	22.824	18.2138	0	0.529454	0.379808	0	0	0	0	0	12.046	12.2698	17.3109	51.6357	10.0798	14.7025	16.7926	21.537	19.8231
13090	Mal	NM_010762	2778	26.8104	6.45154e-06	5.70421e-05	0	0	0.223693	1.96776	0	0	0	0	0	0	0	0	0	0	0	0	0.894773	1.16877	2.28681	1.96644	2.44903
5229	Creb1	NM_009952	8421	26.7923	6.50807e-06	5.73691e-05	38.7235	21.6798	61.4172	79.0371	38.5384	32.7145	39.484	39.847	49.1097	32.6473	34.027	11.4717	19.5408	51.13	82.9327	59.2861	52.32	85.1133	75.9704	79.8993	75.1655
18662	Pou6f1	NM_010127	4575	26.7758	6.56006e-06	5.77069e-05	37.1887	11.0774	56.864	49.1922	39.498	47.3738	50.4641	25.2243	25.4678	35.104	8.22831	7.6608	17.3432	70.8601	34.82	62.5542	59.2216	36.6674	51.2233	54.462	54.4162
1507	Agap2	NM_001033263	5633	26.726	6.71961e-06	5.88859e-05	67.8283	59.7512	83.8432	29.7661	63.4452	92.7132	62.6011	53.0289	64.0264	71.1549	87.9778	25.1492	66.1267	103.805	90.8936	48.0075	92.6669	21.4707	34.5851	31.2485	31.76
3523	Camta1	NM_001081557	8436	26.483	7.55557e-06	6.54658e-05	247.78	202.353	137.163	178.058	258.019	316.793	191.129	242.235	202.45	276.056	224.431	186.084	196.543	160.291	81.119	155.275	151.966	191.317	176.354	167.735	176.827
26353	Wwox	NM_019573	2251	26.413	7.81512e-06	6.74614e-05	43.428	56.1646	11.5123	15.6888	74.687	87.7286	31.2063	33.1262	17.8782	15.9419	62.7622	71.1773	34.5542	14.1885	12.4887	3.36045	16.0117	11.0584	18.1875	16.7181	16.7911
21238	Sertad3	NM_133210	1257	26.2928	8.2815e-06	7.10444e-05	0	0	2.31093	4.2104	0	0	0	0	0	0	0	0	0	0	3.7274	5.51631	0	3.8745	5.05391	4.10445	3.80874
17447	Pam	NM_013626	4103	26.2895	8.29497e-06	7.10719e-05	7.41558	20.2763	42.5078	40.61	5.06863	4.65389	4.10892	6.1661	19.4299	5.06603	12.8448	34.7426	13.2415	35.8186	30.7052	47.1659	56.3412	35.2143	45.4174	41.8285	39.9799
10810	Hoxa2	NM_010451	1681	26.2855	8.3109e-06	7.11644e-05	74.8722	88.3905	222.096	220.882	75.269	76.6992	54.8814	81.5884	53.1248	107.671	122.509	40.1223	102.54	271.279	111.644	268.87	236.59	231.135	216.672	228.564	207.159
3111	Bmpr1b	NM_007560	5336	26.2713	8.3678e-06	7.1563e-05	4.52246	0	7.15019	2.83521	1.57207	0.0305855	0.61434	4.65811	5.85398	14.4057	0	0	0	4.14029	13.1222	2.95336	8.38497	2.58603	2.68976	3.04284	3.02222
21284	Sfr1	NM_026377	1583	26.2648	8.39402e-06	7.15753e-05	80.7484	78.5594	127.518	251.989	82.0263	56.7039	112.12	102.341	74.9357	56.363	99.3185	79.8169	56.5429	94.5074	155.718	136.586	123.263	277.748	231.72	244.918	253.57
4065	Cd40	NM_011611	1683	26.2306	8.53388e-06	7.25396e-05	0	0	1.38595	4.27581	0	0	0	0	0	0	0	0	0	0	0	0.374548	5.16927	4.17992	4.19407	4.23765	4.49159
3102	Bmp3	NM_173404	3112	26.1904	8.70064e-06	7.38621e-05	0	0.711563	0.178444	3.38687	0	0	0	0	0	0	2.13469	0	0	0.308659	0	0.405118	0	3.5647	3.4779	3.02318	3.4817
13208	Mapk9	NM_016961	4682	26.1758	8.76248e-06	7.42959e-05	159.83	186.285	107.788	129.826	157.778	187.221	160.035	167.795	134.703	151.447	204.128	212.557	142.17	102.066	80.3351	132.751	116.002	134.36	127.644	124.422	132.878
1495	Aff3	NM_010678	6010	26.1661	8.80329e-06	7.45963e-05	69.8014	65.1167	161.12	90.1518	96.395	96.0488	45.5835	62.5528	59.5637	58.6649	66.8368	56.4542	72.0591	177.286	185.586	120.619	160.99	87.4286	92.4707	90.4404	90.2676
5322	Crym	NM_016669	1256	26.1567	8.84339e-06	7.48587e-05	0.0463804	0	0.376412	5.92051	0.278282	0	0	0	0	0	0	0	0	0	0	1.50565	0	3.44675	6.93124	6.28239	7.02168
26621	Zeb1	NM_011546	5218	26.1536	8.85645e-06	7.48721e-05	63.6946	48.9181	69.1867	193.501	84.7348	71.9062	40.1172	50.7818	46.2015	88.4263	66.3721	9.5954	70.7867	67.9728	69.8381	80.819	58.1167	231.213	182.801	180.592	179.398
19789	Rb1	NM_009029	4625	26.0797	9.17801e-06	7.70641e-05	78.5976	98.2214	130.85	216.431	61.9316	65.0347	93.2555	79.4614	83.0772	88.8251	115.292	67.565	111.808	81.4129	108.903	170.778	162.308	248.222	210.207	202.336	204.96
26868	Zfp575	NM_001033205	2741	26.0719	9.21242e-06	7.73062e-05	8.98396	31.3551	18.2065	3.25823	3.25167	12.0275	10.4219	8.90617	13.144	6.15252	27.1446	24.2839	42.6369	45.2064	8.45181	8.73909	10.4288	3.35621	4.20616	2.71268	2.75788
2254	Arhgef5	NM_133674	5407	25.9633	9.70752e-06	8.09213e-05	0.0510189	0	2.19277	3.72476	0.0646426	0.241471	0	0	0	0	0	0	0	0.133237	0	1.28241	7.35544	3.40276	3.43771	4.09739	3.96118
17505	Parp14	NM_001039530	7251	25.9503	9.76881e-06	8.13833e-05	0	0.486302	0.331201	1.50257	0	0	0	0	0	0	0.488624	0	0.970283	0.0331178	0	0.434674	0.857012	1.19407	1.07082	1.69511	2.0503
17662	Pcgf2	NM_009545	2752	25.9269	9.87931e-06	8.21555e-05	68.0123	66.1618	210.734	41.3464	81.6019	157.096	62.792	28.2246	25.417	52.9424	65.9809	28.6817	103.823	304.185	342.396	72.611	123.742	30.2818	45.6554	42.8434	46.6049
19277	Ptbp1	NM_001077363	2933	25.8824	1.00938e-05	8.37812e-05	45.5756	61.3111	182.892	73.6233	60.4783	69.6664	67.2197	26.1801	15.8118	34.0974	35.9375	58.4426	89.5532	156.298	294.465	109.825	170.98	42.5273	91.4517	78.8985	81.6158
3497	Camk1d	NM_177343	7111	25.7555	1.07302e-05	8.83297e-05	35.9582	4.14852	15.7847	20.4888	26.5423	29.7674	42.9382	46.1266	27.2458	43.129	8.96839	0.124254	3.35292	24.9221	7.6138	19.6795	10.9236	17.9213	23.0953	20.4217	20.5168
10465	Hdac9	NM_024124	4422	25.7277	1.0875e-05	8.94149e-05	1.96292	2.95119	18.4059	31.6845	1.58084	7.19693	0.74132	1.5056	0.0433372	0.70952	7.41132	1.26547	0.176781	11.2954	39.9687	10.9765	11.3829	29.0639	34.0534	32.394	31.2266
10820	Hoxb2	NM_134032	1629	25.6818	1.11184e-05	9.12002e-05	3.1617	5.77469	44.4351	27.9966	9.44076	1.5028	2.87479	3.26962	1.88225	0	3.53431	11.3904	2.3994	61.4715	40.4267	48.7575	27.0846	26.9075	27.5874	28.4112	29.0803
7902	Fbxw11	NM_134015	4017	25.6721	1.11703e-05	9.15175e-05	143.414	220.164	129.949	80.5707	149.833	169.908	133.601	146.625	90.7377	169.782	144.098	398.562	117.833	133.071	176.577	102.942	107.205	84.0604	78.2535	78.6107	81.3581
22083	Smad5	NM_001164042	6608	25.6582	1.12455e-05	9.19789e-05	40.3384	33.8717	66.7743	122.347	36.0736	24.3769	44.4349	38.1519	66.4987	32.4943	31.9692	18.3631	51.2829	50.2587	42.8182	109.226	64.7939	101.586	125.157	130.02	132.624
7429	Ezh2	NM_007971	2650	25.5873	1.16363e-05	9.48298e-05	73.6306	104.855	146.396	329.593	35.0842	44.1575	98.2552	39.6954	85.5496	139.041	84.5644	67.0177	162.982	63.7948	146.061	235.732	139.995	335.915	311.023	339.964	331.47
11414	Insm2	NM_020287	3101	25.5775	1.16913e-05	9.52225e-05	0.0238553	0	0.617093	2.86843	0	0	0	0.143132	0	0	0	0	0	0.232316	0	2.23606	0	2.53032	3.03499	2.49563	3.41279
10349	H2afx	NM_010436	1359	25.4132	1.26545e-05	0.000102044	183.665	89.3155	280.642	65.7028	389.902	248.589	116.817	157.422	89.1203	100.139	105.261	101.425	61.261	374.606	414.866	240.271	92.8243	49.9727	68.2143	71.0148	73.6095
1651	Akna	NM_001045514	5475	25.3525	1.30298e-05	0.000104446	1.93063	0.176078	7.39988	6.56501	2.07479	3.51746	2.99372	0.243206	1.6801	1.07449	0.242672	0	0.285561	10.0002	2.61485	13.1254	3.85904	5.18901	6.96193	7.06752	7.04158
17540	Paxbp1	NM_026110	3809	25.3517	1.3035e-05	0.000104446	145.974	320.601	198.616	250.598	158.198	112.045	148.273	140.065	142.533	174.729	256.843	453.962	250.997	184.595	176.789	213.486	219.593	288.115	219.35	240.304	254.624
4233	Cdk5rap2	NM_145990	5603	25.2858	1.34555e-05	0.000107381	5.45213	4.01294	24.6864	38.3383	6.20694	5.24304	4.01187	9.10992	8.10601	0.034998	7.03481	3.4693	1.53471	15.3005	31.8693	31.5013	20.0744	33.4651	39.0956	40.5427	40.2499
15501	Nme2	NM_008705	759	25.2817	1.34819e-05	0.000107529	335.391	441.397	144.026	206.311	169.926	150.303	376.987	252.627	560.772	501.731	385.11	558.002	381.078	113.583	129.977	182.714	149.828	265.935	194.368	186.331	178.609
1493	Aff1	NM_133919	8323	25.2026	1.40055e-05	0.000111256	1.60961	0.488305	9.86931	12.3326	0.125984	4.92181	1.91305	1.38654	0.391425	0.918858	1.27707	0	0.187847	6.17437	21.9546	5.2259	6.12236	10.3052	14.1065	12.2336	12.6852
7032	Elf4	NM_019680	5847	25.0497	1.50757e-05	0.000118332	0	0.0668483	2.10133	2.39159	0	0	0	0	0	0	0	0	0.200545	0	0	0.646859	7.75845	2.73022	2.53517	2.36167	1.93929
20962	Scrt1	NM_130893	4010	25.0505	1.50694e-05	0.000118332	126.357	68.6484	139.857	52.6913	137.107	156.163	144.111	105.262	120.239	95.2594	119.72	17.9945	68.2303	188.337	148.518	112.082	110.492	34.1417	59.966	56.4593	60.1982
23595	Tcf7	NM_009331	2224	24.9171	1.60695e-05	0.000125281	1.47435	0	9.0652	3.68293	0.864377	4.54976	0.842271	1.79616	0	0.793544	0	0	0	7.55826	10.7677	3.68468	14.2502	2.43318	3.49123	4.16204	4.64528
18078	Phox2a	NM_008887	1609	24.9128	1.61021e-05	0.000125464	8.24216	0.244063	32.0504	14.7342	1.41199	4.76731	14.2615	3.86198	13.816	11.3342	0	0.732188	0	16.5663	7.11812	71.3029	33.2145	22.029	14.6232	12.7318	9.55292
1614	Ajuba	NM_010590	3255	24.9016	1.61894e-05	0.000125861	0	2.56172	3.18806	3.03368	0	0	0	0	0	0	0	0	7.68516	0.368874	5.038	6.39079	0.954562	2.82623	2.52997	3.44978	3.32874
12083	Klhl6	NM_183390	2405	24.7727	1.72256e-05	0.000133169	0	0	1.35653	4.10036	0	0	0	0	0	0	0	0	0	0	0	0	5.42612	2.81257	3.91331	4.22738	5.44817
15595	Npas3	NM_013780	5879	24.7332	1.75559e-05	0.000135365	40.622	11.3983	37.9355	68.86	46.8785	38.0875	50.5025	54.7359	28.9786	24.5492	21.9216	8.61675	3.65665	32.9632	54.9461	36.4558	27.3767	70.3232	70.9184	65.7927	68.4057
7636	Fam208a	NM_028945	7576	24.6631	1.8159e-05	0.000139605	28.0742	20.2235	44.4438	99.9936	18.4311	14.7134	38.201	21.9699	54.9666	20.1633	34.4901	10.4964	15.684	22.5683	22.642	76.0498	56.5151	113.963	96.4629	95.8214	93.7268
6736	E2f2	NM_177733	4738	24.5126	1.95225e-05	0.000149177	0.0598489	0	2.16636	2.00085	0.22131	0.137783	0	0	0	0	0	0	0	0	2.85678	2.66089	3.14776	1.31344	2.38366	2.49811	1.8082
26713	Zfp27	NM_001037707	3529	24.4445	2.01725e-05	0.000153805	13.0248	3.45395	18.9649	28.6193	13.866	13.7815	18.8436	13.2061	11.7839	6.66796	5.14535	2.33682	2.87969	18.5087	15.4895	21.4349	20.4264	26.988	28.1358	28.2934	31.0599
11905	Kdm5b	NM_152895	6300	24.4117	2.04931e-05	0.00015582	91.2596	68.9827	191.805	163.478	105.162	101.342	102.729	84.7545	59.1337	94.4362	85.201	27.816	93.931	220.85	189.851	190.61	165.909	158.176	161.415	169.736	164.586
10581	Hint1	NM_008248	576	24.2517	2.21327e-05	0.000167093	935.437	1015.28	744.209	464.158	613.182	527.58	1262.63	1438.66	807.803	962.765	695.07	1343.76	1007.01	571.159	811.168	833.919	760.592	381.898	494.267	483.947	496.519
14758	Mycl	NM_008506	3496	24.0957	2.38565e-05	0.00017855	38.8303	12.0085	77.474	80.392	30.2933	23.0615	48.4913	65.6382	15.184	50.3135	11.528	2.69586	21.8015	62.0949	54.7993	110.17	82.8322	77.5488	84.262	80.6899	79.0675
17208	Onecut1	NM_008262	1823	24.082	2.40142e-05	0.000179527	40.2253	175.089	26.5312	31.8387	70.7481	62.3094	16.1838	29.4602	44.2563	18.3939	242.453	94.3506	188.463	16.2023	81.6729	4.84098	3.40877	24.7861	33.5572	33.2122	35.7994
23151	Suv420h1	NM_001167885	6130	24.0373	2.45364e-05	0.00018275	53.4635	53.9233	79.9997	139.125	70.4177	48.1093	60.505	77.6921	33.7631	30.2937	63.65	38.8212	59.2988	83.4799	60.467	90.4928	85.5592	144.775	130.08	140.283	141.363
19629	Rad21	NM_009009	3604	24.018	2.47643e-05	0.000183952	124.473	150.258	215.813	330.999	130.926	114.116	127.861	112.564	150.215	111.16	227.583	109.751	113.441	219.148	289.114	155.667	199.323	318.092	314.413	344.708	346.784
11262	Il18	NM_008360	866	23.9875	2.51302e-05	0.00018627	0.34773	0	5.99669	15.623	0.201803	1.88458	0	0	0	0	0	0	0	10.2599	0	6.55113	7.17575	19.6835	14.9432	13.317	14.5484
21262	Setx	NM_198033	10970	23.9647	2.5407e-05	0.000187819	59.3982	46.8761	65.2179	135.39	64.2809	41.9243	68.0896	41.3101	66.2257	74.5585	70.3274	32.9962	37.3047	57.2651	43.3986	84.5274	75.6806	142.487	129.376	135.74	133.959
27140	Zmiz1	NM_183208	5380	23.9391	2.57217e-05	0.000189639	258.355	212.491	695.54	217.15	468.672	476.872	158.857	157.74	156.373	131.616	231.975	119.834	285.664	918.055	1125.13	331.703	407.272	164.806	251.819	223.977	227.998
15198	Nfatc1	NM_001164110	4896	23.8683	2.6612e-05	0.000195268	0	0	0.582017	0.762897	0	0	0	0	0	0	0	0	0	0.931904	0	0	1.39616	0.607897	0.720856	1.05378	0.669059
13381	Mdfic	NM_175088	3435	23.7756	2.78246e-05	0.000203338	0	0	0.9447	1.05564	0	0	0	0	0	0	0	0	0	1.6079	0	0	2.1709	1.26029	0.684971	0.883516	1.39376
22484	Sox3	NM_009237	2065	23.7753	2.78294e-05	0.000203338	0.187011	0.126186	0.883846	8.89735	0	0	0.907124	0.21494	0	0	0	0	0.378559	0.814023	0	0.915783	1.80558	6.9444	8.54555	10.5817	9.51781
24441	Tnfrsf1a	NM_011609	2155	23.738	2.83322e-05	0.00020625	0	0	3.38929	2.68134	0	0	0	0	0	0	0	0	0	0	0	0.292512	13.2646	1.50665	2.72955	3.09825	3.39089
5241	Creg1	NM_011804	2125	23.7135	2.86675e-05	0.000208472	11.7116	50.5849	15.459	19.1258	7.07269	10.9827	14.7653	18.3807	9.37894	9.68933	47.7265	32.2935	71.7347	11.1876	18.8639	14.2388	17.546	15.1519	22.809	20.6372	17.9053
12325	L3mbtl3	NM_172787	3411	23.7045	2.87925e-05	0.000209161	43.2867	11.1549	55.2794	49.1936	74.3927	46.1718	30.3415	36.6948	40.7882	31.3313	15.191	5.43973	12.8339	48.5765	76.3873	35.8519	60.3019	41.3271	53.3898	51.1596	50.8979
8415	Gabpa	NM_008065	4986	23.676	2.91889e-05	0.000211596	27.1601	29.7977	56.9034	96.8969	22.9931	18.0683	29.1163	46.5572	28.1344	18.0913	21.1401	11.1051	57.1477	46.621	66.6664	55.375	58.9514	98.5468	93.1995	96.3845	99.457
7356	Etv1	NM_007960	4122	23.6629	2.93731e-05	0.000212783	1.89817	11.4631	3.0312	13.7159	5.13006	1.66292	1.36333	0.538393	0.74386	1.95047	13.6452	10.5033	10.2409	1.2234	5.43074	3.05854	2.41211	14.244	15.6973	11.5961	13.3263
11512	Irx2	NM_010574	2463	23.6611	2.9399e-05	0.000212785	6.44201	1.97175	56.3345	85.0371	2.3415	0	12.3588	22.5259	0.311225	1.11462	0	0.837051	5.07819	17.1596	76.5143	86.2496	45.4143	97.3303	79.8621	79.168	83.788
2999	Bcor	NM_029510	6941	23.6331	2.97962e-05	0.000215211	46.3592	16.8912	60.9419	77.0784	59.9743	47.708	52.0186	57.0401	39.0673	22.3469	30.6268	8.95321	11.0935	35.0466	48.1142	81.4633	79.1435	70.2834	81.2879	79.3808	77.3613
24939	Tsc22d3	NM_010286	1971	23.5544	3.09446e-05	0.000222808	53.2424	102.469	17.7159	50.592	38.3925	20.3695	23.5221	46.6145	101.215	89.3415	42.4676	170.348	94.5922	14.1329	10.6971	22.3874	23.6461	65.2058	46.7949	43.9603	46.4069
11413	Insm1	NM_016889	3020	23.5515	3.09881e-05	0.000223005	4.5663	5.79368	18.7502	51.6041	5.61319	0.540411	13.0256	4.26215	0.190368	3.76604	11.5852	0.877716	4.91813	27.9099	8.36052	17.742	20.9883	65.0442	49.4727	46.1764	45.7232
22502	Sp3	NM_001098425	4084	23.509	3.16271e-05	0.000226779	28.9675	35.3584	82.7773	103.917	24.4769	36.685	47.0137	35.8646	22.8988	6.86616	38.6053	40.3851	27.0847	49.2151	82.6652	121.628	77.6014	116.668	105.372	95.1558	98.4713
8224	Foxk2	NM_001080932	5030	23.4916	3.18922e-05	0.000228324	126.415	62.4718	106.478	82.8978	144.36	172.224	116.471	112.595	111.477	101.361	77.6575	36.947	72.8107	125.845	98.6333	108.528	92.9041	72.1877	90.7471	83.5949	85.0613
23778	Tfdp2	NM_001184706	7381	23.4585	3.24042e-05	0.00023175	8.39614	12.5581	20.0972	34.8481	5.42208	6.89875	7.16952	10.8843	9.26899	10.7332	21.2408	6.58396	9.84966	11.7775	14.6	32.795	21.2163	32.2587	34.2045	37.7664	35.1629
6506	Dpf3	NM_058212	1298	23.419	3.30249e-05	0.000235703	2.08515	4.62298	75.9873	22.5115	1.34639	6.03529	0	5.12925	0	0	12.9656	0	0.90338	57.9067	144.988	36.4232	64.6315	12.2986	25.0152	23.0305	29.7016
26642	Zfml	NM_008717	6366	23.4174	3.30498e-05	0.000235759	95.1751	94.6095	117.57	239.018	71.0191	69.399	112.331	110.3	118.456	89.5451	123.763	49.1796	110.886	88.0049	91.2633	166.453	124.557	274.097	231.333	231.835	218.808
17547	Pbrm1	NM_001081251	8117	23.3154	3.47093e-05	0.000246201	100.27	102.924	109.383	219.559	107.436	103.307	102.869	102.364	118.07	67.571	133.621	65.3124	109.838	85.2328	108.935	139.244	104.119	211.869	227.548	219.437	219.383
6774	Ebf1	NM_007897	2245	23.2874	3.51779e-05	0.000249143	71.4955	15.5985	238.268	121.412	93.1801	100.612	43.3884	70.779	103.544	17.4694	15.9791	0	30.8163	218.316	354.56	166.506	213.691	130.404	114.762	127.343	113.138
26578	Zcchc18	NM_001035510	3327	23.1854	3.6944e-05	0.00025979	120.999	235.031	67.0034	118.534	73.8021	84.3246	101.205	73.6417	189.679	203.343	165.996	453.336	85.7618	57.6704	68.8491	72.9457	68.5485	116.783	116.477	115.302	125.572
19982	Reln	NM_011261	11698	23.1764	3.71036e-05	0.00026078	20.0977	3.77995	43.4038	55.6214	36.8107	45.998	13.3709	10.1306	4.58697	9.68902	2.23369	0.251772	8.85438	28.965	80.2162	29.7453	34.6886	44.6169	62.211	51.4461	64.2115
13283	Max	NM_008558	2005	23.1331	3.78843e-05	0.000265727	325.026	147.223	283.558	218.017	363.817	396.9	326.761	233.105	373.429	256.144	148.877	122.216	170.576	369.607	317.419	216.305	230.902	226.847	214.164	210.247	220.811
17210	Onecut3	NM_139226	4689	23.052	3.93869e-05	0.000275708	86.9167	131.387	6.73712	33.5298	196.304	80.2621	91.9827	91.7236	23.2139	38.0143	246.137	76.5042	71.5205	0.614554	0	25.2737	1.06022	30.5826	32.4154	33.3972	37.7241
8203	Foxc1	NM_008592	3990	23.0463	3.94956e-05	0.000276329	0.0287171	0.0326535	3.71677	3.32067	0.131399	0.0409033	0	0	0	0	0	0	0.0979605	0.0601847	0	0.78993	14.017	4.5434	2.83053	2.8143	3.09447
5407	Ctcf	NM_181322	3823	23.0289	3.98266e-05	0.000278083	52.2706	57.5103	92.3072	152.534	53.2558	60.2784	46.426	50.7358	49.2752	53.6526	89.7801	19.2599	63.4908	105.464	94.641	85.4116	83.712	133.905	155.34	164.088	156.802
15935	Nup62	NM_053074	2384	23.0074	4.02402e-05	0.000280405	91.5331	100.055	176.225	45.5804	136.789	121.65	123.754	68.1416	49.7581	49.1057	74.1224	138.984	87.0587	180.808	320.458	95.9825	107.654	38.4744	50.0381	50.157	43.6522
8317	Fubp1	NM_057172	6491	22.9899	4.05801e-05	0.000281923	143.086	113.786	215.4	304.805	124.387	126.244	165.215	126.023	165.715	150.93	138.778	67.5165	135.065	160.56	248.748	232.101	220.192	327.593	291.074	304.166	296.388
13437	Med27	NM_026896	1232	22.9288	4.1786e-05	0.000288513	75.1222	10.8204	82.742	49.051	89.0829	46.0999	109.093	100.875	18.1993	87.3826	6.4706	11.714	14.2766	101.356	68.2434	103.867	57.5015	32.2839	50.0368	56.4113	57.4722
10597	Hist1h1d	NM_145713	2977	22.8237	4.39483e-05	0.00030184	1.20233	0.0495887	8.289	1.01812	0.293519	1.86394	1.88768	1.19275	0	1.97609	0.148766	0	0	12.9062	9.88026	9.95201	0.41748	0.908867	1.02746	0.866525	1.26962
10569	Hif1a	NM_010431	4760	22.8048	4.43495e-05	0.000304142	87.5627	132.506	100.905	194.944	91.456	84.3793	83.2319	99.9598	95.6977	70.6514	160.031	95.101	142.386	65.18	82.245	132.694	123.501	201.449	193.519	184.707	200.1
5301	Cry2	NM_009963	4001	22.7413	4.57195e-05	0.0003123	60.9891	95.9175	56.919	32.6684	79.1471	80.6435	43.8924	55.4675	74.2408	32.5434	117.001	101.879	68.8722	99.1517	51.9813	30.8801	45.6629	25.3596	32.4028	36.2577	36.6536
27002	Zfp809	NM_172763	1491	22.7196	4.61991e-05	0.000314799	18.2229	0.297033	5.53833	17.9618	16.2923	1.86081	19.1593	2.67918	15.4235	53.9225	0.8911	0	0	5.79807	7.50688	6.76447	2.0839	14.5175	23.1974	16.8944	17.2379
2262	Arid2	NM_175251	9029	22.7045	4.65338e-05	0.000316924	61.0989	54.5946	110.342	123.465	68.809	63.4994	76.918	47.2904	45.3782	64.6985	53.0726	45.8632	64.8479	91.4376	117.392	119.803	112.735	114.922	124.562	128.988	125.389
13400	Me1	NM_008615	3257	22.6472	4.78321e-05	0.000324331	32.7974	36.6592	11.9673	24.4476	30.3699	42.7428	33.3578	27.1189	24.2415	38.9538	29.371	49.6447	30.9618	8.03651	8.31159	16.2575	15.2636	25.6696	23.4782	24.0405	24.6021
22098	Smarca5	NM_053124	4638	22.6203	4.84534e-05	0.000327741	28.4654	31.7527	35.769	92.0025	20.3474	14.2161	36.9553	23.6376	40.1206	35.515	37.4316	25.7183	32.1083	20.0891	36.3113	46.3463	40.3293	122.509	88.6767	82.4482	74.3764
5814	Dach2	NM_001142570	5991	22.5959	4.90229e-05	0.000330785	19.173	3.17651	13.5126	17.3002	8.80953	9.91593	22.1215	31.0422	20.7279	22.421	5.54427	1.17986	2.80539	10.2211	10.6013	17.1506	16.0775	17.4328	16.1807	17.3754	18.2117
23130	Supt3	NM_178652	1483	22.5288	5.0627e-05	0.000340448	23.4742	2.64821	35.4519	19.5915	30.5214	14.1965	30.6307	29.63	21.3217	14.545	4.77817	0.794396	2.37206	22.1839	43.529	47.1817	28.913	17.515	21.26	19.0319	20.5592
21286	Sfrp2	NM_009144	2000	22.4885	5.16133e-05	0.000346407	54.6676	76.9655	38.4177	183.89	58.8072	13.3011	36.5276	65.0242	79.2419	75.1039	27.4584	82.4663	120.972	29.777	26.4201	37.5067	59.967	225.384	162.937	174.885	172.353
14833	Myo6	NM_001039546	7867	22.4828	5.17553e-05	0.000347192	9.73453	10.0649	9.20475	41.6853	8.286	8.8168	11.6079	13.5971	7.62455	8.47487	7.93766	20.9651	1.29178	6.25754	4.73146	11.1377	14.6923	39.036	40.3461	42.165	45.194
3512	Camk4	NM_009793	12331	22.4794	5.18395e-05	0.000347589	29.2656	43.1404	14.9921	22.6775	32.0015	56.9514	22.065	25.1963	25.7826	13.5966	51.2158	49.107	29.0983	20.6427	12.5177	6.95236	19.8556	22.03	22.5919	22.3229	23.7653
7038	Elk3	NM_013508	4234	22.4678	5.21289e-05	0.000349022	2.27998	1.79283	17.6709	23.9395	2.22889	3.08369	2.32271	0.628981	0.135784	5.2798	1.7782	0	3.60029	2.32537	28.5257	14.4415	25.391	22.9415	24.7291	26.1269	21.9603
2027	Apbb1	NM_009685	2593	22.437	5.2905e-05	0.000353363	97.8598	87.1035	111.978	42.1246	142.006	125.692	116.308	99.1091	55.9465	48.097	69.856	76.4418	115.013	151.972	97.8748	109.153	88.9112	29.53	46.0957	45.3535	47.5192
18957	Prkd1	NM_008858	3777	22.4135	5.35044e-05	0.000356507	0.351268	0	1.46988	3.57708	0.971667	0.73457	0.247976	0	0.101476	0.0519178	0	0	0	4.06904	0.482414	0.834478	0.493582	3.00872	4.17375	3.85687	3.26898
26909	Zfp647	NM_001168276	2298	22.4061	5.36949e-05	0.000357432	19.7635	1.68669	18.4588	28.5237	17.4153	8.16731	33.4211	8.11216	17.9295	33.5356	2.89084	0.128165	2.04106	21.9446	15.065	22.4934	14.3321	32.3789	28.771	25.4227	27.5224
9741	Gmnn	NM_020567	977	22.3493	5.51773e-05	0.000365368	0.0298126	1.60776	6.04045	11.6473	0.178875	0	0	0	0	0	0	4.82329	0	0.24579	14.9198	6.45204	2.54419	9.69287	12.0413	11.9593	12.8955
26746	Zfp326	NM_018759	2661	22.3401	5.54211e-05	0.000366632	80.2076	164.838	101.574	204.134	59.0419	62.3745	57.3719	91.7393	99.9594	110.759	172.091	198.451	123.971	71.1116	86.0808	110.154	138.95	234.778	193.995	194.399	193.363
18436	Plk3	NM_013807	2367	22.2602	5.75839e-05	0.000379128	35.2325	37.0558	35.2751	7.58081	63.2744	37.5776	29.0834	50.0669	7.36754	24.025	41.3501	28.3697	41.4476	56.5088	12.9763	33.0229	38.5926	4.91529	9.2445	6.79546	9.368
14863	Myt1	NM_008665	5529	22.226	5.85358e-05	0.000384481	46.2273	50.9197	83.2735	135.03	48.234	43.834	47.4316	33.3149	64.2949	40.2543	79.2997	36.0629	37.3967	41.6515	65.9098	123.929	101.603	141.377	126.261	139.997	132.483
8039	Fgfr1	NM_010206	5008	22.2159	5.88211e-05	0.000386172	18.748	12.8332	54.2614	46.5781	18.1461	19.5206	10.8473	12.6739	21.6586	29.6411	13.6188	4.82245	20.0582	36.2986	92.2577	53.6212	34.868	39.9803	50.8819	47.2988	48.1515
8185	Fnip2	NM_001162999	7093	22.2123	5.89224e-05	0.000386471	49.9871	65.0106	25.0073	46.2291	48.4394	78.6224	35.4545	36.7947	72.1914	28.4202	53.2601	70.6306	71.141	35.3451	14.3855	25.4172	24.8813	44.9741	47.4357	44.477	48.0296
22842	Ssbp4	NM_133772	1474	22.2092	5.90092e-05	0.000386857	37.8728	21.5893	62.2344	10.1848	48.4921	37.6455	40.349	59.0196	18.9817	22.749	30.6468	9.99058	24.1306	44.15	60.5711	32.0742	112.142	4.58904	11.9719	11.0153	13.163
13132	Map2k2	NM_023138	2373	22.201	5.9241e-05	0.000388009	122.136	112.794	94.8486	52.3363	105.682	151.237	128.867	130.555	65.3326	151.14	72.7863	166.933	98.6627	128.721	67.46	85.5362	97.6778	41.3893	59.0945	52.0521	56.8092
7171	Ep300	NM_177821	8749	22.1899	5.95583e-05	0.000389535	79.8416	84.4963	148.149	167.507	84.3944	99.7058	80.6643	76.4019	71.4504	66.4329	91.5214	59.3488	102.619	119.561	176.308	133.364	163.363	155.928	176.203	170.736	167.16
10986	Htatsf1	NM_028242	2809	22.1688	6.01624e-05	0.000392929	219.072	311.967	180.646	466.377	145.645	171.28	192.723	182.028	321.669	301.086	315.327	360.787	259.786	205.942	170.875	186.708	159.06	611.551	411.942	425.25	416.764
3861	Cck	NM_031161	685	22.1623	6.03502e-05	0.000393784	0.113942	2.58614	21.8526	3.57704	0	0	0.683654	0	0	0	7.75842	0	0	60.2971	2.27997	23.9262	0.907182	3.55493	3.09137	2.87981	4.78206
2832	Baz1a	NM_013815	6179	22.0504	6.36734e-05	0.000412504	3.57576	1.32951	19.3642	18.758	2.43235	2.06019	1.59158	5.02826	1.5197	8.82247	3.79875	0	0.18977	12.3197	38.3768	14.7925	11.9678	18.8729	17.7827	18.5167	19.8597
14900	Nab1	NM_008667	5087	22.0497	6.36958e-05	0.000412504	11.8088	28.2199	37.0072	28.306	14.6007	10.9723	8.00911	13.6986	14.0893	9.48281	26.0311	25.3589	33.2698	34.2243	49.2246	31.4748	33.1049	35.1576	27.2891	25.7132	25.0641
18889	Prdm5	NM_027547	2182	22.044	6.38691e-05	0.000413387	0.227758	0.473593	3.02102	13.0193	0.400461	0	0	0	0.966089	0	1.42078	0	0	3.85187	0.477171	4.62229	3.13273	11.2841	14.9885	14.2564	11.548
12323	L3mbtl1	NM_001081338	2733	22.0284	6.43492e-05	0.000415916	23.0572	13.228	4.72889	1.71872	21.9331	37.2032	3.94108	2.43607	2.94502	69.8848	10.8572	1.93977	26.887	3.0753	1.90484	4.61298	9.32243	1.18801	2.06619	1.77673	1.84397
21883	Slc40a1	NM_016917	3380	22.0183	6.4663e-05	0.000417206	0.0430871	0.655292	4.18329	20.4389	0.258523	0	0	0	0	0	0	0	1.96588	0	0	0.186498	16.5467	27.4572	18.9344	19.7087	15.6554
15261	Ngfr	NM_033217	3401	21.979	6.58908e-05	0.000423549	131.425	120.777	160.835	61.1833	128.412	180.672	107.127	90.4407	145.827	136.072	145.585	60.4459	156.299	168.682	247.362	76.9189	150.376	66.5883	71.534	51.4885	55.1225
10348	H2afv	NM_029938	1636	21.9651	6.63307e-05	0.000425586	15.9517	29.4134	88.8574	136.761	8.43896	0.399032	17.7474	16.0069	45.5665	7.55128	36.004	19.9829	32.2533	48.8787	67.4608	172.618	66.4721	173.489	115.055	132.359	126.143
13191	Mapk3	NM_011952	1772	21.8928	6.86671e-05	0.000438747	268.216	209.05	178.974	110.511	342.126	296.475	332.463	244.218	207.102	186.909	197.195	57.8407	372.113	221.978	190.375	162.216	141.327	89.63	126.938	109.869	115.608
26751	Zfp335	NM_199027	4570	21.8882	6.88209e-05	0.000439427	21.3369	9.48677	43.9891	15.3724	30.0957	29.1053	11.7844	19.4246	15.5993	22.0123	14.0519	8.50699	5.90142	76.1922	37.706	32.4148	29.6432	9.70972	18.3802	17.2995	16.1001
14205	Mllt10	NM_010804	4886	21.8266	7.08801e-05	0.000450393	38.3092	54.4824	50.8518	113.946	48.6442	53.4773	22.8113	23.4371	46.007	35.4783	42.8737	64.0161	56.5574	47.3786	29.8867	61.0238	65.1181	108.815	117.451	119.103	110.414
1317	Adam8	NM_007403	3034	21.7979	7.18615e-05	0.000455792	6.96091	32.762	6.78391	7.12362	14.861	11.3501	2.00657	3.9499	6.94794	2.64991	24.3772	33.1993	40.7094	7.12337	2.40221	14.1281	3.48192	6.33172	6.43667	8.00231	7.72378
18325	Plagl2	NM_018807	5407	21.7143	7.47979e-05	0.000471179	19.6709	14.5038	53.3289	45.1296	21.623	30.7876	21.7392	14.0371	23.7818	6.05653	18.3474	13.2364	11.9276	45.2116	68.9375	39.2885	59.8779	40.5829	47.1271	46.9516	45.8565
26671	Zfp148	NM_011749	9431	21.668	7.64729e-05	0.000480419	29.4877	20.521	38.618	69.5149	28.1849	26.4595	21.5506	36.8503	15.8089	48.0722	24.2782	14.4903	22.7944	29.893	32.0713	46.1862	46.3215	67.8504	69.6307	71.0047	69.5738
8301	Fst	NM_008046	2337	21.6644	7.66058e-05	0.000481036	0.126616	22.1806	0.813088	5.62952	0	0	0	0.759694	0	0	0	66.5417	0	0.308263	0	1.34866	1.59543	7.40969	4.93329	4.99969	5.17541
20703	Runx1	NM_001111023	7120	21.5977	7.90924e-05	0.000494631	0.0207796	0.10367	0.944275	3.11756	0	0	0	0.124677	0	0	0.311009	0	0	0.0674542	0	3.0987	0.610946	3.95214	3.00719	3.06898	2.44192
20731	Rxra	NM_011305	5267	21.5725	8.00518e-05	0.000499954	3.81628	1.04552	24.294	12.7766	6.40382	5.54653	1.86716	6.99443	1.56453	0.521229	0.16817	0	2.96839	19.4225	52.3361	20.2262	5.19128	8.27069	16.3053	12.4172	14.1131
21249	Setd1a	NM_178029	5931	21.5658	8.0308e-05	0.000501328	35.7259	40.3245	125.211	31.0018	57.5466	62.0236	36.8736	25.7435	19.9682	12.2001	57.273	4.91616	58.7842	114.137	238.09	62.4944	86.1249	24.9083	33.3235	32.4672	33.3082
14202	Mlip	NM_027150	1222	21.5322	8.16117e-05	0.00050832	3.17654	0	0	0.327352	5.00544	5.74286	6.13162	2.1793	0	0	0	0	0	0	0	0	0	0.221415	0.385086	0.496707	0.206201
1672	Akt1	NM_009652	2690	21.5274	8.18003e-05	0.000509037	177.956	166.559	169.387	86.5141	229.009	194.086	200.204	167.475	152.455	124.509	148.504	73.3569	277.817	220.854	123.375	160.755	172.565	63.3676	99.7129	90.9899	91.986
23532	Tbx2	NM_009324	3562	21.4749	8.38817e-05	0.000519421	0.00896673	1.69923	2.16419	6.38085	0	0	0	0	0.0538004	0	5.09768	0	0	0.404498	0	3.71635	4.53591	8.58348	7.19998	5.4955	4.24444
26887	Zfp607	NM_001024726	3511	21.4707	8.40482e-05	0.000520219	0.0404242	2.02967	1.06359	3.22816	0	0	0.133382	0	0.109164	0	0.25228	4.27817	1.55855	0	1.03792	2.15448	1.06195	3.54492	2.68058	3.45757	3.22957
2334	Arntl	NM_007489	2904	21.3943	8.71804e-05	0.000537444	0.954024	0.90806	12.3046	10.5998	0.842513	2.36039	1.45135	1.06989	0	0	1.37255	1.21703	0.134594	15.7114	7.61888	14.7606	11.1273	9.4103	10.3708	11.0777	11.5403
7469	Fadd	NM_010175	2871	21.3717	8.81261e-05	0.000542791	3.10012	0	4.81923	6.39212	0.121742	0.966378	4.89345	2.16437	8.61065	1.84414	0	0	0	1.17099	5.43985	7.90425	4.76184	5.74878	6.72016	6.07821	7.02133
2833	Baz1b	NM_011714	6433	21.3586	8.86816e-05	0.000545727	68.7486	65.51	91.2639	167.278	73.9469	70.4267	62.751	38.7758	84.9899	81.6015	65.8153	50.2698	80.4448	81.0784	113.296	101.517	69.1647	177.996	164.88	166.227	160.008
20779	Sall3	NM_178280	6888	21.3425	8.93656e-05	0.000549204	0.972421	2.26708	20.9467	65.5596	0.0253719	5.78133	0	0	0.0278219	0	2.82906	0	3.97218	44.9036	9.90095	26.9973	1.98479	68.3495	64.5606	64.6145	64.7139
27145	Zmym2	NM_029498	4647	21.3362	8.96353e-05	0.000550617	139.749	229.54	200.329	358.235	121.472	88.8896	171.419	132.573	140.583	183.561	214.91	256.622	217.09	135.855	147.093	286.357	232.013	409.668	343.387	341.53	338.356
10711	Hmgb3	NM_008253	1656	21.2996	9.12186e-05	0.000559846	221.378	559.392	79.4787	288.337	41.052	53.3173	104.35	78.2636	610.901	440.382	591.839	724.034	362.303	62.2094	94.4676	70.8018	90.4361	381.346	239.692	287.177	245.131
13478	Meis2	NM_001159567	4737	21.2888	9.16913e-05	0.000562	624.28	601.507	477.494	1122.33	573.757	580.707	509.626	601.172	816.672	663.746	770.289	480.736	553.495	349.078	501.856	443.131	615.91	1022.08	1130.19	1136.56	1200.47
1269	Acvrl1	NM_009612	3625	21.272	9.24318e-05	0.000566037	0	0	0.514278	1.48462	0	0	0	0	0	0	0	0	0	0	0	0	2.05711	1.04496	1.62267	1.04651	2.22436
10538	Hey1	NM_010423	2205	21.2198	9.4772e-05	0.000579599	24.2439	72.3598	54.833	108.791	29.5628	19.5401	35.6802	33.4147	9.21248	18.0531	93.3958	85.2178	38.4658	67.5215	86.2934	49.1713	16.3457	120.744	95.5022	108.526	110.39
13418	Med13l	NM_172424	9295	21.2109	9.51728e-05	0.000581537	31.0166	20.7085	67.0822	50.3229	44.7479	33.2203	22.6216	30.3223	26.3694	28.8181	27.3492	6.81251	27.9638	66.1636	67.9656	53.3046	80.8949	39.9086	54.2971	54.6572	52.4288
19054	Prox1	NM_008937	4135	21.206	9.5397e-05	0.000582393	21.6465	8.36361	20.1512	55.4874	23.6678	16.6559	31.4844	20.1799	10.1959	27.695	11.8886	8.47598	4.72627	26.0753	9.06475	37.3493	8.11527	52.5435	58.1533	57.6884	53.5644
23883	Thra	NM_178060	2246	21.1519	9.78991e-05	0.000595829	248.774	83.8064	373.206	85.9913	460.635	376.91	218.93	148.412	128.156	159.599	126.79	5.76981	118.86	600.877	548.64	172.045	171.264	45.2957	107.901	98.0998	92.6687
11283	Il1rap	NM_001159318	4320	21.0909	0.000100799	0.000611326	2.35166	16.0212	2.03564	7.0363	3.27677	3.40009	1.30084	2.97956	3.01651	0.136176	6.25358	26.2479	15.5621	2.22349	0.964062	4.52345	0.431541	5.38634	8.06078	6.18216	8.51592
18953	Prkcq	NM_008859	3313	20.9871	0.000105928	0.000639353	0.164206	0.0393261	4.67958	3.50377	0	0.985235	0	0	0	0	0	0	0.117978	4.20403	7.69969	4.37621	2.43841	1.63338	5.1134	3.38939	3.87892
6033	Deaf1	NR_027769	2360	20.9686	0.000106867	0.000644461	186.182	141.4	155.056	81.4452	219.488	296.119	240.7	139.55	87.2111	134.025	110.532	111.943	201.725	216.428	129.707	128.477	145.612	62.2539	86.837	88.9245	87.7652
25532	Usp3	NM_144937	2201	20.9677	0.000106916	0.000644477	92.4731	43.6212	177.63	142.644	94.09	122.792	67.873	103.048	38.9195	128.116	49.7004	20.6072	60.5561	236.646	150.076	156.374	167.425	134.363	142.07	153.33	140.815
11910	Kdm7a	NM_001033430	9553	20.946	0.000108031	0.000649783	12.1355	17.1087	30.9999	57.9512	8.54324	7.36324	24.9029	12.266	9.22778	10.5098	17.1532	1.84982	32.323	15.5349	30.6808	44.7385	33.0452	65.9926	53.2002	58.5659	54.0461
4920	Cnot1	NM_153164	8391	20.9327	0.000108717	0.000653059	77.667	73.1478	147.616	168.256	97.5339	81.8841	64.7955	81.9361	69.954	69.8982	105.56	33.3448	80.5388	155.999	182.558	133.119	118.789	160.549	168.299	172.197	171.979
24621	Tpr	NM_133780	7549	20.9094	0.000109939	0.000659541	234.162	213.381	220.83	486.359	221.363	285.57	191.192	180.68	246.039	280.126	273.74	184.15	182.254	224.645	276.399	196.65	185.627	594.794	445.235	462.468	442.939
18678	Ppard	NM_011145	3218	20.8627	0.000112421	0.000671516	0.653113	0.1835	9.94738	4.51415	0.760304	0.50716	0.291052	0.275855	2.0843	0	0.550499	0	0	5.29823	2.18397	4.11363	28.1937	3.27912	5.19124	4.80978	4.77646
25551	Usp47	NM_133758	5534	20.8415	0.000113562	0.000677166	110.556	139.438	160.465	254.337	133.108	115.487	118.557	105.469	92.6672	98.0468	193.268	94.9454	130.099	126.838	194.258	162.432	158.331	237.323	250.976	264.14	264.909
18898	Prdx6	NM_007453	2334	20.8146	0.000115036	0.000685068	101.389	87.0136	43.5849	101.803	66.2655	104.747	127.609	96.9855	61.4158	151.313	78.7463	82.653	99.6414	44.7556	38.9218	47.2638	43.3982	107.695	96.4739	104.153	98.8911
7199	Epha5	NM_007937	7787	20.7894	0.000116428	0.000691075	30.6128	48.6555	86.8215	62.9869	18.2235	32.6534	35.2415	30.4375	39.6219	27.4989	68.8742	44.3656	32.7266	49.2794	116.193	69.213	112.601	65.601	58.9503	61.5784	65.8178
6661	Dvl3	NM_007889	2953	20.7131	0.000120752	0.000711412	168.771	148.743	299.893	135.179	265.367	197.525	135.432	144.744	178.917	90.6427	178.32	122.576	145.332	290.718	362.018	216.241	330.596	108.118	151.706	140.182	140.708
4361	Cenpk	NM_021790	1217	20.7038	0.000121288	0.000712192	0.211402	0.121303	1.30615	6.35257	0	0.134104	0.769602	0.364709	0	0	0.363909	0	0	0	2.13884	1.5539	1.53185	8.22603	5.60669	6.6084	4.96916
5810	Dab2ip	NM_001114124	6518	20.6763	0.000122892	0.000720999	75.3314	57.9173	86.4478	43.9678	101.001	85.9589	75.0089	65.4405	49.2764	75.3026	79.7694	44.8697	49.1126	71.7684	96.3633	70.2124	107.447	33.5825	48.3354	45.5139	48.4395
17496	Park7	NM_020569	903	20.6489	0.000124517	0.000728373	320.528	301.374	175.702	136.422	276.754	331.83	356.283	392.732	266.976	298.592	88.7715	434.445	380.907	204.768	69.4701	231.064	197.505	95.5833	137.056	156.785	156.265
17512	Parp9	NM_030253	3548	20.62	0.000126243	0.000737848	0	0	1.22603	1.55851	0	0	0	0	0	0	0	0	0	0	0	0	4.9041	1.67771	1.12736	1.58245	1.84651
14179	Mkl1	NM_001082536	4366	20.6033	0.000127256	0.000742515	40.3015	30.7435	76.1107	19.4647	43.9905	69.1543	45.9078	35.2763	30.6373	16.8427	12.7811	37.6417	41.8078	63.7468	141.595	52.8432	46.2578	16.0507	21.4486	20.5059	19.8535
26709	Zfp260	NM_011981	3716	20.5701	0.000129294	0.000753137	35.5971	37.8598	48.5366	107.158	46.6532	22.7502	34.5304	32.0108	49.3532	28.2848	56.1343	36.9342	20.5108	43.3616	39.4368	68.8719	42.4759	114.679	104.537	105.396	104.019
10719	Hmgn1	NM_008251	1200	20.5613	0.000129834	0.000755962	188.422	571.083	319.71	581.619	93.0604	67.1857	187.321	147.211	375.768	259.987	459.485	695.809	557.956	202.115	251.837	398.18	426.708	807.199	464.301	545.772	509.205
6446	Dnmt3a	NM_007872	9735	20.5388	0.000131242	0.000762881	51.3308	42.9302	90.4029	112.201	59.6181	58.492	46.8543	49.1952	49.4496	44.3754	72.9712	19.4836	36.3359	113.84	80.6692	84.5018	82.6006	94.0254	121.644	116.734	116.399
15576	Nostrin	NM_181547	1805	20.5262	0.00013203	0.000766173	0.0473432	0.490722	9.36185	1.91785	0.193641	0.0904178	0	0	0	0	1.47217	0	0	0	8.50831	1.39693	27.5421	2.2485	1.17318	1.5973	2.6524
14905	Naca	NM_001113199	7034	20.5224	0.00013227	0.00076692	36.7707	28.7619	86.4319	33.5381	43.3301	46.242	37.616	30.667	32.884	29.8852	18.4479	33.497	34.3408	63.7042	181.142	49.1996	51.6819	36.8119	29.6033	34.0636	33.6735
11073	Ier5	NM_010500	3270	20.4952	0.000134	0.000775329	23.6728	2.03988	50.8537	46.9741	6.89425	6.7877	15.1805	17.7812	65.1097	30.2836	1.21893	0	4.90072	16.5232	21.174	53.9761	111.742	41.3715	41.733	52.8551	51.9367
26922	Zfp664	NM_001081750	4078	20.4704	0.000135597	0.000783586	173.872	272.411	189.885	357.565	177.675	213.83	144.579	122.337	170.49	214.318	253.802	225.478	337.955	154.399	222.956	172.199	209.984	375.002	357.316	357.48	340.461
20068	Rgmb	NM_178615	2633	20.4363	0.000137826	0.000793488	64.6517	22.8291	176.687	78.0355	78.7189	64.0296	107.605	53.9432	81.0072	2.60664	19.8479	12.8637	35.7758	141.455	154.913	196.555	213.827	64.1228	79.2632	83.1047	85.6515
20999	Sdpr	NM_138741	3055	20.4131	0.000139362	0.000801331	0.102354	0	0.866691	4.53926	0.400435	0.213688	0	0	0	0	0	0	0	0	0	0.619016	2.84775	3.80834	4.23595	4.66904	5.44371
12487	Leo1	NM_001039522	2192	20.4042	0.000139958	0.000804422	51.3184	124.774	69.648	149.134	68.2462	44.5238	76.4837	44.7496	34.0086	39.8986	95.566	135.572	143.185	89.7227	111.742	41.1232	36.0038	160.959	139.97	154.098	141.508
22692	Spp1	NM_009263	1410	20.3603	0.000142923	0.000819765	16.4468	0.417762	0.110181	11.824	6.4451	9.49131	0	22.6647	0	60.0797	0	1.25329	0	0	0	0	0.440723	10.1703	13.8503	11.8382	11.4373
18655	Pou3f3	NM_008900	3064	20.307	0.000146607	0.000838116	117.371	153.089	62.0635	116.883	84.757	58.1122	148.866	125.304	134.033	153.15	211.031	94.0088	154.227	43.4974	58.4478	77.1497	69.1593	148.177	102.516	110.094	106.745
21483	Sirt1	NM_019812	3905	20.3036	0.000146845	0.00083913	20.5747	59.9924	35.6442	48.4361	13.7392	19.0997	35.7373	24.3237	12.2196	18.3289	53.7576	86.2826	39.937	37.0813	37.728	31.9621	35.8052	50.2338	43.8038	49.1176	50.5892
26867	Zfp574	NM_175477	4195	20.2818	0.000148376	0.00084544	37.6117	17.3819	62.9792	15.5351	65.8219	41.3943	31.5923	28.9905	5.98437	51.8865	32.3052	8.8462	10.9945	87.182	75.6381	46.5823	42.5143	10.1907	17.8919	16.4585	17.5994
18020	Phb2	NM_007531	1360	20.2707	0.00014917	0.000849614	247.966	266.045	159.248	141.14	403.108	314.768	196.963	181.457	184.591	206.908	176.174	406.701	215.262	183.104	138.57	163.617	151.699	112.804	135.29	154.533	161.933
14339	Mphosph8	NM_023773	2936	20.2447	0.000151033	0.000857754	116.15	200.569	61.3843	232.006	48.3332	54.0308	121.382	88.1353	242.288	142.729	354.482	136.728	110.496	53.1638	38.0338	92.5364	61.8033	338.488	207.88	209.837	171.819
5299	Cry1	NM_007771	3016	20.1321	0.000159369	0.000898463	23.7269	86.0979	26.9225	45.439	22.5984	22.2404	33.5389	32.0821	28.9107	2.99082	34.9485	108.005	115.341	24.6029	24.5107	18.8106	39.7659	48.0853	42.3611	43.5207	47.7889
2496	Atf3	NM_007498	1976	20.0536	0.000165452	0.000928003	0.0808185	0	9.77659	6.17528	0	0	0	0	0.484911	0	0	0	0	0	1.05383	0	38.0525	4.24477	6.42992	6.75782	7.2686
26493	Zbtb17	NM_009541	3415	20.0063	0.000169233	0.000944461	16.085	36.0255	42.5468	16.8787	23.5915	15.5797	18.9241	15.0766	16.2176	7.12024	37.4792	32.2552	38.3423	66.5211	37.3486	31.3798	34.9378	13.3106	17.9824	18.2182	18.0037
13284	Maz	NM_010772	2371	19.9742	0.000171847	0.000957886	140.145	76.1868	154.458	62.545	240.951	157.009	139.642	135.72	57.386	110.163	57.7178	73.9101	96.9325	215.728	183.338	123.627	95.1393	37.8866	72.7397	67.7119	71.8419
4644	Cic	NM_001110132	6099	19.9673	0.000172413	0.000959882	88.043	49.5662	111.753	40.0931	148.543	147.47	86.9957	48.9772	60.3912	35.8814	45.6746	25.1592	77.8648	173.242	95.3013	76.0695	102.398	31.3202	47.5282	41.0771	40.447
25656	Vezf1	NM_016686	4521	19.9247	0.000175955	0.000977247	80.1252	81.6441	182.153	189.119	122.963	99.9585	77.9987	96.7028	40.0144	43.1137	100.017	77.6533	67.2618	165.722	265.939	168.711	128.243	208.388	178.664	185.275	184.148
27151	Zmym4	NM_001114399	7008	19.9086	0.000177311	0.00098241	96.8148	81.591	94.163	214.31	84.1637	88.868	77.6495	74.9252	172.905	82.3772	104.4	42.8251	97.5482	70.5196	87.8427	117.114	101.176	259.18	191.876	199.294	206.889
14260	Mn1	NM_001081235	6128	19.8529	0.000182087	0.00100485	86.149	66.9176	41.8993	78.0139	92.3429	95.9304	104.084	77.2104	67.4232	79.903	70.6088	80.8399	49.3043	24.1391	57.8956	55.4449	30.1178	73.2057	82.0128	78.5463	78.2908
11161	Igf1	NM_010512	7121	19.8219	0.000184796	0.00101693	14.9684	0.860963	11.5386	11.8173	17.8663	10.3134	34.4601	13.8996	6.00127	7.26987	2.36334	0	0.219555	3.60829	20.214	5.57688	16.755	10.9049	13.0844	10.6121	12.6679
7041	Ell2	NM_138953	3649	19.7938	0.000187287	0.001027	1.04152	10.9556	3.81799	15.0087	1.58047	3.80169	0.128337	0.364909	0.105035	0.268695	2.67013	26.5546	3.64191	6.90994	3.56669	1.90025	2.89508	14.6073	14.7014	14.2221	16.5039
15217	Nfe2l1	NM_008686	4654	19.7881	0.000187802	0.00102901	130.917	53.6319	93.2299	87.0239	184.262	160.469	133.427	92.5088	99.895	114.943	78.4122	33.8568	48.6268	88.9549	145.976	79.3712	58.6169	65.9855	102.376	89.5335	90.201
26042	Vopp1	NM_146168	2886	19.6882	0.000196961	0.00106862	305.201	402.251	266.538	248.939	317.126	282.978	283.805	295.132	265.144	387.023	423.695	423.618	359.442	340.901	283.296	220.387	221.566	206.255	247.517	260.32	281.664
11647	Jazf1	NM_173406	2925	19.6831	0.000197445	0.00107041	121.218	83.26	51.8553	79.0118	123.14	152.101	130.004	119.574	47.8929	154.596	80.8534	75.9213	93.0052	85.6283	37.8209	48.7051	35.2669	91.9474	73.281	73.4596	77.3594
15708	Nr1d1	NM_145434	2627	19.6557	0.000200039	0.00108066	39.9248	14.8002	65.1217	9.17067	75.5059	78.092	26.3833	40.0429	7.80554	11.7193	15.6785	1.34536	27.3767	98.3583	69.3596	36.2333	56.5357	2.78088	10.5687	12.0147	11.3184
26733	Zfp292	NM_013889	9977	19.5997	0.000205448	0.00110643	105.546	125.529	146.212	250.529	99.1955	108.585	88.9949	97.6055	102.628	136.265	121.983	83.2468	171.357	98.298	156.512	152.773	177.264	269.024	254.177	245.829	233.087
23582	Tcf25	NM_001037877	2937	19.5442	0.000210961	0.0011304	594.169	375.689	515.77	293.333	865.238	923.046	500.193	518.96	305.236	452.344	374.869	338.445	413.752	751.562	538.407	386.546	386.562	183.604	337.99	320.744	330.995
394	2610044O15Rik8	NM_153780	1453	19.5197	0.000213439	0.00114235	23.3895	108.47	24.6098	61.3449	19.3645	7.18862	53.1796	27.187	25.4549	7.96251	49.9875	250.942	24.4793	13.3868	18.9893	44.2513	21.8117	73.7409	56.3524	55.9771	59.3093
3192	Brip1	NM_178309	6931	19.5156	0.000213861	0.00114329	0.00840482	0.300764	1.03544	1.88906	0.0504289	0	0	0	0	0	0	0	0.902293	0.138587	0.0375554	1.45518	2.51042	1.5615	2.20656	1.97042	1.81776
7253	Ercc2	NM_007949	3547	19.5004	0.000215408	0.00115023	20.9729	13.4264	37.5771	7.28686	36.2136	32.1623	15.4473	22.5242	10.5895	8.90078	22.1001	11.1266	7.05249	72.7113	26.7121	30.212	20.6731	3.96662	8.35811	7.87169	8.95101
23646	Tdg	NM_011561	3119	19.4907	0.000216412	0.0011547	1.92443	0.130875	6.41308	5.07576	4.03425	3.29653	0.450435	0.284611	1.72037	1.76038	0.141993	0	0.250633	9.162	5.84186	6.26524	4.38321	4.59769	4.82796	5.30301	5.57438
6660	Dvl2	NM_007888	2935	19.4795	0.000217566	0.00115907	12.5161	2.1977	21.5474	9.08324	18.28	9.78669	7.02055	10.4347	21.0899	8.48514	4.22506	0.903135	1.4649	20.6182	29.2667	21.907	14.3975	6.72967	10.1811	9.97839	9.44381
12680	Loxl2	NM_033325	5179	19.4439	0.000221287	0.00117509	0.0719967	0.615433	2.26514	4.40663	0.337442	0.0945381	0	0	0	0	0.940653	0	0.905647	0.0927348	2.41248	5.35548	1.19988	3.44808	4.63397	4.92237	4.62211
8532	Gatad2b	NM_139304	1906	19.4021	0.000225746	0.00119529	110.724	131.586	346.124	273.145	144.32	231.449	85.5033	70.094	72.8944	60.0832	217.721	101.368	75.6706	314.723	578.907	196.782	294.082	243.882	292.813	274.031	281.856
8370	Fzd1	NM_021457	4378	19.3954	0.000226464	0.00119817	1.79538	8.35739	9.56173	36.1242	4.15148	1.49113	3.10205	2.02764	0	0	11.8357	0.20182	13.0347	17.9362	4.99427	9.07103	6.24542	39.9242	36.0617	33.6901	34.8211
19497	Qrich1	NM_001114119	3362	19.3821	0.000227903	0.00120533	139.414	77.3269	223.335	151.944	165.249	161.262	153.361	156.18	66.805	133.626	110.785	48.8827	72.313	220.78	263.316	183.559	225.685	136.894	159.005	154.858	157.018
5233	Creb3l2	NM_178661	3318	19.3514	0.000231264	0.00121984	0.182896	0	5.58325	7.15894	0	0	0	0	1.09738	0	0	0	0	1.51985	0	1.70985	19.1033	6.36059	6.87851	7.04297	8.3537
27121	Zkscan1	NM_133906	8261	19.2729	0.000240078	0.00126297	94.4385	114.191	112.899	205.805	83.7103	82.5603	111.676	100.58	88.3604	99.744	131.507	118.615	92.4519	78.4856	118.285	135.672	119.154	227.991	199.002	195.553	200.673
20777	Sall1	NM_021390	5256	19.252	0.000242478	0.00127462	1.05858	0.669285	18.8347	36.1417	0	6.24126	0	0	0.0729212	0.0373085	0	0	2.00785	17.2244	6.93332	24.1064	27.0748	27.5923	41.5424	36.9832	38.4487
14308	Morf4l2	NM_001168225	1928	19.2478	0.000242963	0.00127496	190.333	274.941	138.39	270.68	149.29	138.233	225.407	176.343	208.932	243.795	292.877	300.022	231.922	159.925	130.553	141.57	121.512	278.148	252.251	258.783	293.539
5327	Csdc2	NM_145473	2489	19.2355	0.000244394	0.0012808	168.68	207.001	176.5	96.1983	234.373	219.988	138.854	138.559	118.878	161.429	195.193	161.047	264.762	269.177	79.8982	151.45	205.475	76.0943	109.561	95.1676	103.97
2273	Arid5b	NM_023598	4494	19.1911	0.000249617	0.00130472	16.6881	5.66982	38.1011	48.2531	15.7106	13.0375	20.8412	5.23456	6.99343	38.3111	12.6142	0.655368	3.73989	40.4503	40.8922	28.3341	42.7278	40.158	52.6177	50.6151	49.6218
6018	Ddx5	NM_007840	3520	19.1558	0.000253847	0.00132383	629.476	921.184	625.315	1509.28	370.573	337.165	680.768	733.742	806.835	847.771	986.785	988.826	787.943	444.39	496.634	807.117	753.118	1884.46	1278.24	1459.97	1414.44
13042	Maff	NM_010755	1800	19.1057	0.00025998	0.00134971	15.7881	36.8338	25.8255	4.88837	24.1753	11.3336	8.32538	31.0696	4.79092	15.0338	23.374	11.1264	76.001	31.3512	16.3408	26.2652	29.3448	4.50949	4.83647	4.46801	5.7395
26971	Zfp760	NM_001008501	4209	19.0986	0.000260857	0.00135274	13.4542	7.08913	20.426	56.6397	2.94798	2.52038	16.6893	14.8689	24.131	19.5674	8.62815	7.06742	5.57181	10.8972	6.80272	36.5429	27.4612	67.7549	52.1557	52.7084	53.9397
6932	Eid1	NM_025613	2543	19.0736	0.000263988	0.00136693	775.684	896.43	538.543	723.186	643.586	567.332	918.19	959.961	905.66	659.377	812.086	866.311	1010.89	490.378	513.326	568.146	582.321	752.871	680.234	709.849	749.791
18248	Pkd1	NM_013630	14170	19.006	0.000272621	0.00140795	24.6762	13.7193	37.2333	18.7277	31.388	27.1354	14.0458	20.1409	27.6839	27.6635	18.5964	14.3416	8.21997	33.7073	41.754	35.0993	38.3728	13.2707	20.9384	20.6252	20.0764
2961	Bcl10	NM_009740	1760	18.9894	0.000274787	0.00141755	20.7283	77.0667	39.1677	110.161	18.6677	14.4658	34.0584	39.3414	4.35539	13.4814	119.778	10.3752	101.047	24.6959	21.5928	40.4723	69.9097	121.141	99.7298	110.963	108.809
15326	Nkrf	NM_029891	3266	18.9532	0.000279555	0.00143946	72.5181	23.2482	64.7902	64.3866	72.7726	92.4957	98.7938	76.512	42.599	51.9354	25.6288	22.4544	21.6614	39.263	52.2825	93.0299	74.5856	69.6721	62.0277	62.1193	63.7274
17550	Pbx1	NM_183355	6910	18.9509	0.000279866	0.00144053	224.074	147.218	382.454	483.192	315.304	363.773	144.015	193.278	188.143	139.933	229.001	77.9142	134.737	497.024	431.693	209.361	391.737	436.475	479.939	503.719	512.635
5081	Cops5	NM_013715	1239	18.9371	0.000281706	0.00144892	447.448	234.691	323.706	332.803	389.158	377.385	484.177	459.255	478.86	495.853	236.987	160.454	306.633	290.335	395.802	339.857	268.83	312.935	331.757	337.535	348.986
4317	Cebpz	NM_001024806	4077	18.9233	0.00028357	0.00145671	35.6432	38.3396	52.7311	103.92	32.0203	38.7495	35.8377	27.1079	47.0044	33.1392	58.3333	31.2799	25.4056	34.1622	81.0833	40.0452	55.6336	111.958	104.226	102.279	97.2189
14979	Nbl1	NM_008675	1762	18.9129	0.000284973	0.00146112	0.904834	0	5.42578	7.34285	0.29755	1.75986	0	0	3.37159	0	0	0	0	2.9983	6.64776	4.65081	7.40625	4.29963	8.27913	8.78427	8.00838
12170	Kmt2e	NM_026984	7256	18.8986	0.000286924	0.00146867	209.888	198.888	286.609	486.155	213.538	222.629	160.253	155.311	229.484	278.115	230.166	111.704	254.793	239.177	344.707	293.55	269.002	561.835	464.836	456.779	461.172
5839	Dapk3	NM_007828	1696	18.8887	0.000288272	0.00147426	56.4273	20.3241	34.309	11.2204	34.9317	61.4903	23.7465	28.2641	72.4288	117.702	11.7509	3.82046	45.4009	44.7425	25.1702	44.9729	22.3506	6.38136	16.6477	11.4524	10.4
6742	E2f7	NM_178609	5476	18.8839	0.000288936	0.0014757	1.07894	1.36636	16.6803	4.5552	0.351055	2.44389	0.598634	3.08005	0	0	2.50715	0.806763	0.785151	15.7431	42.4955	5.98593	2.49657	4.79278	4.51154	4.68311	4.23338
14597	Mtf2	NM_013827	4058	18.8736	0.00029035	0.00148019	49.237	46.2039	80.2693	136.827	44.9177	44.1592	96.2456	38.7194	45.3827	25.9976	43.109	57.2642	38.2386	74.9762	51.9567	105.786	88.3586	137.552	131.443	137.048	141.264
11691	Kat6a	NM_001081149	9126	18.8712	0.000290689	0.00148137	57.9511	59.2998	90.8495	133.322	65.3201	63.6293	52.1363	60.5517	66.1889	39.8805	81.723	32.6602	63.5162	66.3363	77.9521	90.1409	128.969	138.635	131.102	133.753	129.799
19011	Prmt5	NM_013768	2641	18.8187	0.000298043	0.00151279	119.599	60.3828	114.222	68.3013	110.839	105.054	90.6106	101.845	131.12	178.125	58.3571	61.2241	61.5671	92.745	150.205	119.819	94.1188	53.6836	78.5777	68.7185	72.2254
22062	Sltm	NM_025690	3691	18.7949	0.000301429	0.0015276	141.925	220.159	134.638	333.419	123.768	121.685	86.0225	94.3981	239.092	186.584	324.208	186.002	150.266	128.233	143.371	149.095	117.853	424.804	279.272	320.549	309.05
26939	Zfp692	NM_182996	1949	18.7884	0.000302373	0.00153133	38.3113	73.1517	24.736	24.4824	50.393	42.9573	29.7945	37.3482	49.6545	19.72	70.8966	119.078	29.4801	11.0889	29.7825	25.5509	32.5217	24.7108	22.4543	22.9679	27.7964
26652	Zfp111	NM_019940	7134	18.7057	0.000314502	0.00158349	1.92391	8.41664	4.06706	10.7099	2.64567	0.549047	0.919013	2.11536	4.32486	0.989539	5.89757	11.3532	7.99914	2.99582	2.99192	6.2736	4.00691	10.3161	10.7519	11.5286	10.243
22954	Stat6	NM_009284	3805	18.7003	0.000315319	0.00158703	0.0194416	0	1.54223	1.42226	0	0	0	0.116649	0	0	0	0	0	0.126222	0	0	6.04271	1.42218	0.803873	1.67497	1.78802
17879	Peg3	NM_008817	6624	18.617	0.000328063	0.00163748	184.007	192.391	147.906	365.212	221.723	283.045	118.065	132.07	169.476	179.664	295.519	148.239	133.415	182.858	150.818	129.518	128.43	323.139	378.115	379.154	380.44
10759	Hnrnpd	NM_001077265	6810	18.6088	0.000329346	0.00164329	164.974	160.692	200.293	355.608	168.5	160.88	127.906	195.985	189.808	146.768	209.082	100.12	172.875	192.921	241.606	160.785	205.862	385.552	342.186	354.359	340.337
18895	Prdx3	NM_007452	1445	18.5996	0.000330778	0.00164984	106.048	107.315	47.386	66.8602	83.571	81.4327	111.485	189.213	99.0677	71.5165	96.544	118.828	106.574	52.5144	23.778	71.1068	42.1447	61.4165	67.5739	64.6881	73.7624
13434	Med24	NM_011869	3410	18.5697	0.000335525	0.00167111	59.4641	37.5542	110.651	35.9142	56.7846	84.1866	57.1302	51.2837	30.572	76.8273	44.0279	7.08236	61.5522	134.646	132.438	91.8742	83.6456	26.0255	41.0546	38.4477	38.1292
11684	Kars	NM_001130868	2173	18.557	0.00033755	0.00167999	176.239	140.913	126.099	100.133	171.384	174.019	163.572	148.495	162.358	237.604	185.262	77.3918	160.086	123.107	133.083	99.5007	148.706	71.7202	106.654	109.216	112.944
1913	Ankrd49	NM_019683	1764	18.5081	0.000345504	0.00171309	21.5445	20.7326	40.9936	91.4771	20.8049	15.9133	31.5918	12.0776	10.9724	37.907	26.3617	11.0195	24.8166	19.8753	25.528	39.3084	79.2627	107.676	87.0991	87.1409	83.9927
20536	Rps14	NM_020600	596	18.5077	0.000345562	0.00171309	501.52	285.284	716.97	260.845	368.289	380.901	869.031	889.192	228.292	273.412	320.268	165.051	370.532	587.046	481.724	846.127	952.982	197.933	288.583	246.966	309.899
6333	Dmtf1	NM_011806	3739	18.5019	0.000346524	0.00171663	67.0222	65.8703	73.1018	175.257	64.034	62.2	68.8865	73.4806	35.8262	97.7059	107.551	56.3996	33.6608	45.9208	58.6172	109.922	77.9475	203.199	160.026	171.549	166.256
24736	Trim16	NM_053169	3896	18.4985	0.000347081	0.00171816	22.7759	11.8383	3.21992	9.91811	28.6634	36.5283	18.5109	13.671	14.1662	25.1157	24.7811	5.21613	5.51782	2.77365	0	4.04495	6.06107	10.7644	10.0251	9.89295	8.98997
15124	Nedd8	NM_008683	602	18.4834	0.000349585	0.0017287	648.592	564.745	556.403	347.534	415.421	479.582	896.932	730.659	775.143	593.818	491.431	457.439	745.365	481.869	394.769	714.134	634.839	254.839	356.058	396.248	382.99
12653	Lmx1b	NM_010725	1219	18.4349	0.000357735	0.00176333	2.6781	0	38.2195	5.9409	12.186	3.88263	0	0	0	0	0	0	0	97.3155	0	35.681	19.8813	3.55136	6.75559	5.6017	7.85493
10601	Hist1h2ab	NM_175660	506	18.4253	0.000359361	0.00177062	1.22068	0	12.9157	0.897854	3.79916	0.322538	0	0.877176	0	2.32522	0	0	0	17.0848	22.1201	12.4578	0	0.534722	0.464995	0.599778	1.99192
23031	Strap	NM_011499	2644	18.424	0.000359597	0.00177062	181.754	183.048	171.826	375.831	149.975	141.353	209.886	182.476	215.193	191.644	259.126	176.78	113.238	153.31	178.289	156.399	199.306	400.942	346.435	367.02	388.927
13424	Med16	NM_198107	3218	18.3508	0.000372316	0.00182481	58.1529	12.5831	62.1194	24.2977	90.9106	157.372	28.3776	31.9992	24.4757	15.7826	15.1387	4.02703	18.5836	85.1449	59.2907	65.0345	39.0077	14.0414	30.3432	25.3221	27.4842
8135	Flt3l	NM_013520	1075	18.3361	0.000374937	0.00183518	0.13809	10.274	2.57679	0.927244	0.650275	0	0	0	0.178267	0	6.17967	21.37	3.27233	0.446766	0	2.34554	7.51484	0	0.656616	1.41157	1.64079
23158	Suv420h2	NM_146177	2235	18.3104	0.000379536	0.00185168	17.7421	7.06581	54.0361	12.5885	17.5152	8.90869	27.4486	19.6605	10.5465	22.3731	8.12436	0.131777	12.9413	68.0119	58.5813	60.357	29.1942	7.38467	13.8962	14.5294	14.5437
7327	Esrrb	NM_011934	4198	18.3077	0.000380023	0.00185275	5.82872	35.8475	6.00257	9.85942	8.53408	8.35848	8.47809	6.13229	3.46937	0	20.9939	61.0373	25.5113	3.20335	14.6952	3.00316	3.10858	6.89637	10.5369	9.75961	12.2448
11575	Itgb3bp	NM_026348	2738	18.2843	0.000384281	0.00186956	1.51318	10.9265	2.17882	11.7535	5.04242	1.13253	1.36831	0.972647	0.419949	0.143239	16.6604	12.6931	3.42611	1.22787	1.52109	4.60456	1.36177	12.3525	9.88242	11.2506	13.5284
2992	Bclaf1	NM_001025392	5454	18.2605	0.000388648	0.00188947	260.591	227.932	282.445	566.132	258.489	214.793	175.592	231.529	296.099	387.046	269.916	217.517	196.363	229.438	291.843	245.835	362.666	703.362	519.496	524.593	517.077
11692	Kat6b	NM_017479	6908	18.2432	0.00039186	0.00190242	33.8228	54.8247	72.6277	95.8579	30.4846	36.9029	19.7951	24.3514	61.0864	30.3167	67.188	29.1623	68.1236	60.069	71.103	71.5411	87.7976	86.9912	96.9011	99.2662	100.273
2503	Atf7ip	NM_019426	4527	18.2008	0.00039984	0.00193776	104.224	98.7783	169.335	222.417	132.528	109.452	106.964	90.2998	101.851	84.2505	131.386	50.0304	114.919	165.82	193.886	154.284	163.351	206.439	226.14	233.834	223.257
22766	Srebf1	NM_011480	4299	18.1827	0.000403281	0.00195239	7.3852	46.1765	21.1889	20.0842	4.75624	14.6918	8.9325	7.84664	3.47701	4.60699	9.06563	8.6322	120.832	22.4552	7.87127	36.0711	18.3578	17.8114	23.2058	19.6254	19.694
18656	Pou3f4	NM_008901	1086	18.1677	0.00040618	0.00196505	2.31474	20.7936	45.3549	62.4825	1.4483	0	3.44974	1.22611	0	7.7643	16.3122	0	46.0685	44.003	46.0193	69.6535	21.744	41.8561	76.046	64.9732	67.0549
4157	Cdc45	NM_009862	2143	18.1602	0.000407631	0.00197138	0.949093	0	2.47709	5.8607	1.06015	0.685412	3.05937	0.62135	0.268274	0	0	0	0	0.224113	0.607318	6.17716	2.89976	2.90392	5.92885	8.14305	6.467
26931	Zfp687	NM_030074	4632	18.1386	0.000411835	0.00198646	14.5676	5.95883	34.7311	15.6476	27.58	12.0501	13.7498	7.47418	10.5913	15.9601	3.15521	3.75147	10.9698	47.7993	34.9535	16.0585	40.1132	12.6756	17.5754	16.0196	16.3198
13099	Maml2	NM_001013813	5945	18.0199	0.000435718	0.00208708	5.97831	10.8808	18.8025	32.0495	6.55539	4.06295	9.53148	9.55643	5.86677	0.296862	12.0683	6.04403	14.5299	20.3985	22.0672	16.6471	16.0973	27.6259	35.1447	32.8757	32.5516
8222	Foxj3	NM_172699	4762	17.995	0.000440904	0.002108	50.5744	119.885	80.8843	62.3343	61.5445	61.8956	58.2182	44.1801	51.9537	25.6544	64.2645	217.088	78.3038	113.967	62.5871	58.3769	88.6064	61.5344	62.157	62.2016	63.4443
23331	Taf1	NM_001081008	8060	17.9596	0.000448379	0.00214004	28.3683	45.8916	51.7186	78.6502	30.6374	30.2312	21.4978	26.9835	45.4841	15.3761	50.1121	50.7558	36.807	35.0671	67.3671	57.7182	46.7221	75.2291	73.2427	83.0638	83.0652
14865	Myt1l	NM_001093776	7104	17.9557	0.000449204	0.00214324	135.676	72.1925	176.372	202.429	150.21	161.435	109.033	119.835	159.266	114.278	113.961	45.0656	57.5509	222.897	120.035	164.601	197.955	171.315	209.984	211.873	216.544
12447	Ldb1	NM_010697	2288	17.8898	0.000463481	0.00220452	150.652	89.9973	246.381	91.7709	261.225	199.44	167.426	117.753	54.191	103.875	53.8111	126.665	89.5156	276.241	283.96	229.499	195.823	56.6446	114.662	98.7529	97.0247
26511	Zbtb33	NM_020256	5122	17.859	0.000470307	0.00223239	28.1309	21.741	44.6004	72.5611	27.1593	29.4418	37.4862	37.8686	14.8161	22.0136	32.3381	19.378	13.507	24.1918	50.7685	56.4891	46.9522	80.1883	68.17	71.6354	70.2508
26464	Ywhab	NM_018753	2775	17.8487	0.00047261	0.00224101	1051.62	922.115	648.187	787.637	1044.79	1112.91	898.804	941.125	1393.25	918.849	936.026	1151.98	678.34	728.891	694.5	502.928	666.431	898.291	746.815	732.527	772.914
11054	Id4	NM_031166	1660	17.8452	0.000473384	0.00224392	196.627	111.814	64.9991	228.302	98.4348	116.603	173.216	140.107	236.891	414.514	92.0436	136.971	106.428	42.6749	18.0326	115.06	84.2286	336.908	198.719	192.239	185.34
13179	Mapk10	NM_009158	7203	17.7906	0.000485815	0.00229576	141.991	116.354	137.888	261.352	113.645	126.68	159.157	138.769	175.833	137.862	147.749	80.1422	121.171	133.821	98.5824	141.773	177.376	237.326	271.187	263.335	273.562
18880	Prdm11	NM_001177536	1869	17.7654	0.000491678	0.0023211	0.631859	0	6.54989	2.46258	1.40258	0.0873217	0.250563	0	2.05069	0	0	0	0	20.0435	3.48176	1.01182	1.66244	0.868602	2.76957	2.84165	3.37049
26507	Zbtb3	NM_001098237	2037	17.7584	0.0004933	0.00232796	6.15195	0	2.50717	3.05047	5.2334	16.1041	4.13817	4.79368	0	6.64235	0	0	0	0.825213	0.255569	7.11752	1.8304	2.12524	2.54115	3.94817	3.58732
23543	Tbx6	NM_011538	1715	17.7163	0.000503261	0.0023661	0.519672	0.086079	13.3897	0.948741	0	0	3.00369	0	0	0.11434	0.258237	0	0	2.80043	23.5254	4.04315	23.19	0	0.823163	1.06176	1.91004
26728	Zfp281	NM_001160251	5275	17.7136	0.000503907	0.00236833	28.8062	24.7805	57.2688	70.7404	49.397	29.7944	25.0353	35.1715	11.9523	21.4867	31.4002	20.2676	22.6737	62.1852	63.4088	61.5427	41.9385	70.425	69.4042	72.722	70.4105
12562	Lime1	NM_023684	1959	17.646	0.000520321	0.00243473	87.4119	216.461	72.2726	104.662	51.5631	34.8236	116.418	67.518	142.138	112.011	144.234	322.787	182.362	35.9163	25.9101	121.632	105.632	97.7862	105.933	110.613	104.316
18670	Ppap2b	NM_080555	3162	17.5845	0.000535746	0.00249594	4.45843	2.47225	63.6848	67.6762	0.0552692	0	1.62914	18.8096	0.303031	5.95351	0	0	7.41674	27.9476	86.9302	92.3019	47.5596	60.1551	70.5416	67.8096	72.1986
18335	Plcb1	NM_019677	7116	17.5811	0.000536594	0.00249673	40.5335	13.2011	35.6734	54.8197	29.9864	45.7091	40.144	41.7904	54.184	31.3871	13.8166	20.2391	5.54765	52.2051	27.4709	34.6364	28.3813	62.3572	57.5324	48.2569	51.1321
12390	Lbh	NM_029999	3068	17.5587	0.000542335	0.00251648	145.916	70.0446	228.193	77.1145	258.553	252.945	139.819	95.483	42.5374	86.1585	60.6285	20.8316	128.674	297.197	288.973	149.373	177.23	54.7665	90.9553	81.0158	81.7204
25647	Vegfa	NM_001110266	2840	17.5168	0.000553206	0.00255872	69.0138	130.07	46.6225	52.2442	107.811	54.3631	35.7823	40.6343	78.2742	97.2182	139.88	195.691	54.6381	83.0332	30.429	42.3942	30.6334	75.0735	45.152	45.8972	42.854
26144	Wasl	NM_028459	4332	17.5188	0.000552705	0.00255872	40.1746	65.8685	52.7546	109.528	35.5413	33.6806	60.7539	51.1269	44.2375	15.7074	81.0714	54.4581	62.076	38.8033	36.2925	66.0631	69.8595	125.167	99.7202	104.28	108.946
4105	Cd81	NM_133655	1518	17.4889	0.000560576	0.00258649	238.896	151.877	471.507	280.382	333.75	367.801	152.707	278.65	144.548	155.919	130.704	174.812	150.114	497.833	577.866	330.962	479.369	185.727	338.361	288.193	309.246
5714	Cyr61	NM_010516	2028	17.4888	0.000560599	0.00258649	0.78966	0.385466	30.1938	16.2482	0	0	0	0	0	4.73796	0	0	1.1564	9.47285	7.18768	16.7848	87.3297	15.6098	14.0384	15.7131	19.6314
15627	Npnt	NM_033525	3720	17.4875	0.000560949	0.00258724	2.66473	0.714317	14.5791	13.8194	5.07372	5.04529	0.377663	3.81808	0.566668	1.10698	2.14295	0	0	30.5981	17.633	4.40577	5.67964	10.9101	15.2431	14.1546	14.9697
23979	Tle2	NM_019725	2749	17.4827	0.000562238	0.00259146	28.7371	6.17344	16.436	9.49344	35.1557	32.1778	34.0708	36.0054	15.8245	19.1885	8.69965	2.14276	7.6779	36.252	4.45033	12.3826	12.659	6.10233	7.70312	11.7023	12.466
23569	Tceb2	NM_026305	508	17.4629	0.000567541	0.00261329	580.012	531.855	515.712	291.511	367.068	321.268	892.356	674.514	562.085	662.781	521.339	561.796	512.43	355.005	422.214	601.824	683.806	293.472	300.131	279.292	293.148
15033	Ncor2	NM_011424	8906	17.4438	0.000572692	0.00263526	32.0844	23.5178	87.4491	44.8341	72.3692	49.1848	15.1964	17.9913	23.5189	14.2457	25.3612	13.8564	31.3357	120.149	121.994	53.3679	54.2853	32.0819	52.7323	46.4807	48.0416
15196	Nfat5	NM_133957	13443	17.423	0.000578368	0.0026552	35.1679	32.1936	67.0617	80.2469	27.4824	32.9006	31.4571	28.2628	33.9424	56.9624	46.7486	14.8543	34.9779	43.4079	70.7717	77.8401	76.2271	84.7958	79.1118	79.7042	77.376
24576	Tox2	NM_001098799	1675	17.424	0.000578096	0.0026552	14.297	0.705077	30.7282	29.7484	7.09479	59.6304	3.07542	8.21456	3.31789	4.44869	2.11523	0	0	57.2028	9.94566	34.2467	21.5178	17.4457	43.8267	28.5369	29.1843
26807	Zfp445	NM_173364	6189	17.3644	0.000594667	0.00272191	95.2321	133.392	95.8342	184.135	84.2322	85.017	79.299	85.6291	122.804	114.412	132.097	122.444	145.634	80.8992	70.6994	106.028	125.71	210.982	180.619	173.982	170.957
6504	Dpf1	NM_013874	2278	17.3439	0.000600466	0.00274572	69.5315	78.6024	77.1967	31.8698	64.3656	85.1843	75.4465	58.2579	89.1726	44.7624	91.9581	59.6027	84.2464	142.206	68.3307	60.878	37.3725	24.1113	38.6293	32.1074	32.631
13374	Mcts1	NM_026902	876	17.3265	0.00060546	0.00276673	177.9	336.787	100.813	123.938	50.6728	99.3012	226.667	147.444	248.953	294.364	341.763	474.06	194.539	52.3586	32.9828	157.591	160.321	171.731	108.243	106.186	109.593
23561	Tceal5	NM_177919	1016	17.3206	0.000607138	0.00277349	78.0898	96.5601	40.2915	39.5137	60.7192	60.3984	64.5299	68.1504	127.695	87.0455	115.95	89.8641	83.8661	41.3622	25.876	67.6277	26.3002	42.8757	38.9058	36.5918	39.6816
23160	Suz12	NM_199196	4372	17.3157	0.000608572	0.00277729	45.7486	52.7794	62.8322	131.035	40.0528	22.099	49.0582	58.7809	33.0061	71.4943	62.9063	42.2382	53.1937	52.1798	56.3222	78.7234	64.1034	215.738	110.648	106.866	90.8896
2267	Arid4b	NM_194262	6105	17.3088	0.00061055	0.00278356	56.3166	70.0942	78.3429	161.725	46.0305	48.1994	53.3888	40.6409	105.314	44.3258	116.214	31.2613	62.8069	68.0486	67.4085	92.4121	85.5025	233.563	141.905	150.377	121.057
1645	Akap8	NM_019774	3695	17.307	0.000611074	0.00278503	102.186	176.46	117.356	164.897	104.904	105.652	115.333	104.626	82.7747	99.8247	232.166	152.084	145.132	133.749	112.643	120.614	102.421	166.516	154.863	168.54	169.667
23367	Tal2	NM_009317	1144	17.2504	0.000627689	0.00284857	0.452646	0	0	4.86483	0	0	0	2.71587	0	0	0	0	0	0	0	0	0	5.67628	4.73043	5.96895	3.08365
6324	Dmrtb1	NM_019872	1795	17.2447	0.000629381	0.00285438	31.9339	5.325	18.7673	8.91837	35.7311	10.5469	32.3507	44.0142	41.1032	27.8573	3.20746	6.23502	6.53252	9.76601	3.04525	20.3683	41.8896	5.42646	9.96203	11.5816	8.70342
6943	Eif2ak2	NM_011163	4326	17.2428	0.000629953	0.00285603	0.955837	0.999824	3.13891	14.7864	1.09074	0.905432	0.866024	2.87282	0	0	0.92138	0	2.07809	5.60652	1.14324	4.22574	1.58012	16.1991	12.5639	12.9084	17.4742
24743	Trim25	NM_009546	5563	17.2375	0.000631544	0.00286044	0.319094	0.282756	4.63638	8.62386	0.219905	0.880123	0	0.638291	0	0.176248	0.477667	0.370602	0	0.0431668	0.0467907	1.69971	16.7559	9.97066	7.52852	7.80132	9.19495
12756	Lrp6	NM_008514	5427	17.2304	0.000633681	0.00286637	17.7489	34.3092	32.6823	57.3397	21.8331	22.765	23.4712	17.6657	14.7603	5.99807	31.0919	48.7886	23.047	23.7615	33.4784	46.8098	26.6797	50.0556	61.6941	60.8709	56.738
26896	Zfp62	NM_001024846	4027	17.1894	0.000646101	0.00291621	33.769	60.6916	61.0765	117.084	26.7328	31.2872	48.6095	30.7511	27.9818	37.2515	62.0269	12.2139	107.834	48.6595	80.4095	62.7703	52.4665	143.515	111.947	105.998	106.873
26856	Zfp560	NM_001004190	4732	17.1749	0.000650539	0.00293018	6.07999	23.7036	10.2662	18.0369	3.32386	5.41485	10.4903	4.2209	8.14012	4.88991	25.457	34.668	10.9858	6.03894	5.50078	16.9181	12.607	25.0443	18.8946	16.5469	11.6617
10537	Hexim2	NM_027658	1928	17.1331	0.000663565	0.00298109	24.8204	6.85112	20.9466	6.2059	21.12	27.3418	12.6306	25.3235	49.9966	12.5101	5.7427	2.44417	12.3665	13.4517	20.1163	18.3093	31.909	3.50842	7.5663	7.08348	6.66539
20269	Rnasel	NM_011882	4757	17.1282	0.000665099	0.00298701	34.5236	23.0466	41.7376	81.2935	26.047	20.7222	37.9013	28.6446	33.477	60.3492	24.9508	22.908	21.2809	51.9447	32.7765	50.3549	31.8744	84.4641	75.1812	83.0014	82.5272
27126	Zkscan2	NM_001081329	4575	17.1194	0.000667869	0.00299751	25.5905	56.6693	32.5196	52.0453	29.146	34.2105	29.48	17.56	26.4731	16.6733	52.9516	71.0073	46.0491	29.1314	21.3927	44.9178	34.6365	45.1836	52.869	55.9877	54.1408
13455	Mef2c	NM_001170537	6427	17.1109	0.000670573	0.00300867	2.00828	9.10907	33.1237	20.0138	1.16924	0.457083	5.53773	0.0690604	0.178905	4.63766	14.6776	0	12.6497	10.1629	31.5499	33.4455	57.3365	20.3759	19.0368	19.6674	20.9753
5371	Csrnp3	NM_153409	10671	17.0941	0.000675947	0.00302885	116.425	102.19	178.271	226.864	138.993	91.918	129.418	120.956	101.215	116.046	126.957	95.3313	84.2821	159.574	166.286	169.952	217.273	234.235	217.472	224.125	231.623
5062	Commd7	NM_133850	3467	17.0348	0.000695186	0.00310143	25.1036	53.2398	21.2559	19.8037	29.0849	21.7951	34.0387	39.0466	18.7381	7.9184	38.0667	92.3409	29.3118	15.7228	17.4182	31.0909	20.7917	18.4958	19.3415	22.1904	19.1872
5237	Crebbp	NM_001025432	7507	17.0148	0.000701803	0.00312449	130.564	112.09	258.079	256.533	155.439	148.312	101.558	110.564	138.156	129.353	167.782	39.4684	129.02	273.885	327.703	212.193	218.536	239.501	265.564	259.018	262.048
10210	Gtf2h5	NM_181392	1171	17.0014	0.000706274	0.00314036	204.186	252.781	131.249	163.956	182.82	203.622	206.357	204.679	146.142	281.497	245.454	238.183	274.705	156.673	89.8035	180.873	97.6441	133.09	162.551	178.568	181.613
13395	Mdm2	NM_010786	3027	17.0007	0.000706504	0.00314037	71.2189	71.4639	159.085	154.244	51.037	80.8203	110.617	90.3245	58.561	35.9537	57.6457	59.644	97.1022	155.966	184.882	120.992	174.498	148.38	153.516	164.577	150.504
24716	Trf	NM_133977	2332	16.9894	0.000710314	0.00315427	1.45877	0	3.17152	10.3353	5.02102	0	2.20897	1.52265	0	0	0	0	0	4.63386	1.1162	0.540621	6.3954	8.58583	11.6029	10.6715	10.4811
22493	Sox8	NM_011447	2999	16.9764	0.000714684	0.00317164	2.14488	0.0492249	5.14494	21.54	1.10719	0	1.56153	0.296	9.90454	0	0.147675	0	0	7.76701	0	12.1911	0.621627	14.8863	22.4382	23.6293	25.2062
26913	Zfp652	NM_201609	2665	16.9732	0.000715765	0.00317542	67.7553	28.2048	123.068	101.398	93.2498	98.4124	51.6627	59.9574	75.2885	27.9608	24.0965	11.8251	48.6928	172.917	162.82	70.9603	85.5764	88.8362	104.798	106.819	105.141
3934	Ccnl2	NM_207678	2442	16.9711	0.00071649	0.00317762	90.0361	138.272	205.137	212.662	98.2585	65.8965	96.6522	111.417	51.6368	116.355	193.509	117.109	104.198	163.435	148.376	236.709	272.03	231.015	199.445	213.2	206.989
25412	Uimc1	NM_011307	2931	16.9453	0.000725273	0.00320792	6.95375	29.307	20.6206	42.5805	3.57751	2.45001	8.14856	9.5403	13.9919	4.0142	4.23082	16.4796	67.2107	21.3837	24.511	23.4424	13.145	36.1867	45.1951	45.6112	43.3289
12018	Klf12	NM_010636	5731	16.9184	0.000734587	0.00324333	67.155	58.7243	146.701	115.695	97.3675	76.9176	48.6198	51.1928	95.3002	33.532	49.2257	45.3783	81.5689	145.398	126.356	149.259	165.791	115.338	113.723	119.229	114.491
21247	Set	NM_023871	1851	16.8857	0.000746027	0.00328755	55.0381	156.686	51.1465	120.639	16.4281	23.6298	39.215	52.9936	115.541	82.4208	149.3	226.58	94.1786	28.1522	45.5625	66.7485	64.1227	135.65	112.369	114.197	120.34
5058	Commd4	NM_025417	824	16.8824	0.000747214	0.00328964	278.447	224.706	206.884	126.907	357.158	188.952	372.823	298.953	218.15	234.646	234.875	329.193	110.049	239.554	183.534	175.186	229.262	88.9859	121.927	141.063	155.651
18951	Prkch	NM_008856	3300	16.8815	0.000747542	0.00329004	36.8531	7.44462	15.2227	14.244	11.4919	20.722	48.3913	23.1341	55.3424	62.0369	2.81831	13.1196	6.39593	8.07733	14.5135	5.15753	33.1424	12.8726	13.9034	14.8525	15.3477
4529	Chd6	NM_173368	10549	16.8499	0.000758811	0.00333539	41.0438	52.2177	79.2025	114.364	42.0958	42.3443	30.1429	45.4833	39.966	46.2304	88.7936	11.6145	56.245	68.7699	74.4939	79.1167	94.4294	105.083	115.291	120.587	116.494
17920	Pex2	NM_008994	2115	16.8415	0.000761804	0.00334643	21.9928	72.3443	49.3944	63.0354	11.4855	22.3779	23.0276	41.7619	23.1052	10.1987	82.084	88.0086	46.9404	25.0923	68.4279	44.7067	59.3507	77.0132	57.5147	58.4017	59.2118
26699	Zfp217	NM_001159683	5670	16.8251	0.000767748	0.00336826	1.26202	0.242405	6.70382	8.93608	2.6507	0.402973	1.89964	2.34842	0.270387	0	0	0.727216	0	5.46343	4.49896	13.6746	3.17834	9.44846	8.29938	9.15281	8.84367
17881	Peli1	NM_023324	3485	16.793	0.000779525	0.00341344	66.9656	104.724	128.443	193.11	45.6837	43.5523	119.864	87.4966	59.1133	46.0834	79.8068	87.5539	146.812	103.497	73.2715	162.972	174.033	223.909	178.238	188.232	182.06
23449	Tax1bp1	NM_025816	3282	16.776	0.000785817	0.00343882	191.171	134.042	159.744	312.214	131.79	174.89	198.337	221.655	199.228	221.128	151.809	92.1617	158.155	133.312	196.928	127.917	180.821	318.632	281.241	313.243	335.74
12166	Kmt2a	NM_001081049	16439	16.7725	0.000787109	0.0034423	66.9865	91.5755	122.835	142.877	87.2265	75.1043	55.0375	47.0338	64.4424	73.0744	119.805	62.3121	92.6095	107.192	125.2	130.989	127.958	135.309	147.421	146.473	142.306
7868	Fbxo30	NM_027968	4977	16.7638	0.000790353	0.00345539	18.6303	15.5395	31.4265	62.0915	7.09299	13.215	31.8036	22.1168	16.711	20.8426	14.6825	23.6115	8.32457	14.8608	26.5161	47.4958	36.8332	70.0752	58.0537	59.1792	61.058
19335	Ptov1	NM_133949	1883	16.7445	0.000797617	0.00347508	317.479	255.254	334.952	188.328	371.983	329.615	294.959	313.972	285.573	308.772	137.826	294.366	333.572	357.336	385.814	301.624	295.034	127.023	223.292	202.674	200.324
3564	Caprin2	NM_181541	3566	16.7354	0.000801038	0.00348242	15.0547	51.859	16.1649	18.7196	18.8189	10.6637	19.1734	28.752	4.8366	8.0835	12.792	110.012	32.7728	27.071	15.7667	15.0255	6.79623	18.817	18.4746	17.8722	19.7145
7771	Fancd2	NM_001033244	4780	16.7347	0.000801298	0.00348242	0.138299	0	0.845307	1.97671	0.219366	0.239002	0	0.371424	0	0	0	0	0	0.0502378	1.08911	2.24188	0	2.09437	1.82126	1.61902	2.37218
20734	Rxrg	NM_009107	2133	16.7355	0.000801023	0.00348242	0.442328	0	0.885795	3.87536	0.163864	0.306056	1.97596	0.208088	0	0	0	0	0	1.12582	1.8305	0.295529	0.291336	2.28329	4.41233	4.55303	4.25279
20182	Rif1	NM_175238	8502	16.7192	0.000807204	0.00350013	20.056	28.4825	29.8156	66.6774	17.4926	16.5085	19.0031	25.4763	21.0976	20.758	58.2376	6.06227	21.1476	17.0033	31.4426	45.7463	25.0702	67.8492	68.9369	65.7878	64.1355
4177	Cdh13	NM_019707	2290	16.6948	0.000816585	0.00353437	110.635	147.648	191.053	74.9073	98.9042	125.931	123.517	97.2984	41.7584	176.399	209.835	119.095	114.016	178.372	197.78	115.613	272.448	48.6789	90.5189	78.4562	81.9754
4287	Cdyl	NM_009881	3442	16.689	0.000818824	0.00354074	3.91296	0.866908	9.43142	14.8658	2.18325	4.83638	3.40139	2.19218	3.17353	7.69106	2.31603	0.171134	0.113557	4.74413	2.64683	13.0029	17.3319	16.6649	13.3298	14.6806	14.7878
19232	Psmc1	NM_008947	1492	16.6893	0.000818728	0.00354074	191.999	294.439	138.613	205.802	194.322	148.765	204.647	241.56	211.032	151.67	232.421	468.038	182.856	130.208	85.3117	168.998	169.932	228.316	188.608	196.189	210.094
11618	Iws1	NM_173441	9623	16.6685	0.000826809	0.00356747	39.3737	53.6343	48.3001	88.1592	42.4963	37.3794	46.8643	37.8678	31.2259	40.4088	86.9369	28.5555	45.4104	38.929	48.8242	54.1735	51.2737	94.3324	84.1587	88.4161	85.7296
793	9130019O22Rik	NM_030226	3878	16.6183	0.000846671	0.00363504	0.501571	12.0207	2.29489	3.27053	0.225324	0.462931	0.966071	0.801176	0.0988329	0.455091	0	0.987311	35.0748	2.1673	0.201364	5.68921	1.1217	3.41875	3.519	2.89558	3.24881
12029	Klf7	NM_033563	1334	16.6171	0.000847175	0.00363608	667.13	257.39	447.197	302.136	709.264	899.458	375.976	291.465	1352.81	373.813	253.974	319.25	198.947	489.094	762.548	199.883	337.262	350.28	304.78	277.894	275.589
24030	Tmbim6	NM_001171036	2423	16.6106	0.000849769	0.00364495	79.0357	43.5288	178.737	87.1104	108.333	129.998	97.0235	77.6694	37.9636	23.2269	31.8038	64.423	34.3597	237.164	193.369	125.917	158.497	69.0103	93.7072	93.6892	92.0349
15734	Nr4a1	NM_010444	2474	16.6009	0.000853693	0.00365952	5.89863	25.9302	11.3181	3.44812	1.76598	8.70774	4.73224	9.86735	9.60509	0.713356	7.69753	39.2855	30.8077	5.33853	5.15543	8.15346	26.6251	1.96857	4.08948	3.86413	3.87032
23132	Supt5	NM_013676	3511	16.595	0.000856053	0.00366623	78.0384	114.958	123.325	57.7701	98.5552	92.7814	73.2265	51.7047	74.8317	77.1305	62.8176	193.776	88.2808	119.966	163.696	93.0016	116.638	43.2326	60.8491	61.9769	65.0219
12435	Lcor	NM_172154	4663	16.5912	0.00085761	0.00367176	38.8567	19.2622	49.3736	73.6617	48.6094	22.0499	45.3941	26.4616	36.1246	54.5008	22.0346	9.34791	26.4039	33.2164	59.1152	57.4533	47.7092	74.968	70.1876	76.8645	72.6267
26323	Wnt4	NM_009523	1101	16.5895	0.000858269	0.00367231	0.268756	0	0.438658	6.01196	0	0	0	1.61254	0	0	0	0	0	0	1.18209	0.572538	0	3.68623	5.76999	9.78548	4.80612
26654	Zfp113	NM_019747	6470	16.5816	0.000861519	0.00368394	5.13991	3.03745	13.7597	20.0172	7.21194	2.04321	6.7314	5.41951	6.19044	3.24297	5.95522	0.136564	3.02057	14.5864	8.32788	23.4803	8.64417	19.5295	20.474	20.7094	19.356
7381	Ewsr1	NM_007968	2400	16.5801	0.000862122	0.00368538	145.407	309.382	214.67	269.083	126.92	106.015	117.856	106.894	227.489	187.269	266.833	379.566	281.747	180.403	222.011	240.064	216.202	309.013	237.444	276.427	253.448
370	2410016O06Rik	NM_023633	2346	16.5762	0.0008637	0.00369087	22.7214	2.3235	32.8768	18.6688	22.7205	39.6532	24.3533	23.0818	20.585	5.93463	1.88779	0.251085	4.83163	13.4092	91.2037	9.94181	16.9526	22.4898	19.5571	16.9467	15.6815
20739	Ryr2	NM_023868	16813	16.5671	0.00086745	0.0037013	18.934	29.1573	21.6555	12.3853	24.5932	18.8996	9.41452	23.2578	25.0873	12.3513	35.3764	15.6432	36.4523	30.6795	11.6733	17.5466	26.7226	9.81666	13.0987	12.9424	13.6832
25172	Txn1	NM_011660	1051	16.5586	0.000870913	0.00371195	328.959	386.857	197.814	267.729	204.359	227.647	380.969	304.488	397.679	458.609	273.058	573.632	313.88	196.953	164.945	215.319	214.038	267.223	272.226	270.858	260.609
4109	Cd84	NM_013489	3190	16.5167	0.000888332	0.00377568	0.0614714	1.60373	0	1.47796	0	0	0	0	0	0.368828	0.277666	0	4.53351	0	0	0	0	1.27227	1.69643	1.28435	1.65879
18927	Prkaa1	NM_001013367	4655	16.5134	0.000889744	0.0037778	13.433	10.8911	13.8802	40.9791	10.7372	11.9555	16.3981	8.58144	24.2479	8.67783	20.4551	4.74526	7.47298	9.33722	14.259	20.1771	11.7476	39.9897	38.2121	42.4101	43.3045
4527	Chd5	NM_001081376	9486	16.5003	0.000895288	0.00379552	32.8681	18.4089	63.9265	23.3552	51.3635	60.4059	13.6749	23.6758	28.2021	19.8864	32.8679	5.58866	16.7701	96.7028	81.2227	33.8241	43.9566	14.9176	26.7383	25.6266	26.1381
22080	Smad3	NM_016769	5090	16.5004	0.000895238	0.00379552	3.7059	6.1619	38.3589	12.1467	4.87546	3.9759	2.66813	3.05202	0.112949	7.55095	1.13112	0	17.3546	56.3307	32.3709	19.1958	45.5382	12.3324	13.0356	11.0901	12.1286
4324	Cela1	NM_033612	1106	16.4957	0.000897213	0.00380135	7.66145	3.46184	0	1.33273	10.7448	15.0514	0.84684	10.8354	8.49024	0	0	10.3855	0	0	0	0	0	1.46783	1.48916	1.23481	1.13914
14267	Mnt	NM_010813	4586	16.4903	0.000899509	0.00380991	34.2804	22.9245	80.2513	26.1997	71.1087	59.0396	25.5289	20.1311	9.82004	20.0541	21.632	11.1746	35.9668	129.651	83.1519	62.2667	45.9357	21.5936	30.2703	27.1657	25.7692
3598	Carm1	NM_021531	3218	16.4694	0.00090844	0.00384069	181.245	146.029	244.842	91.4904	358.538	257.739	156.44	129.1	76.8215	108.833	200.106	112.025	125.955	334.087	342.64	139.08	163.562	73.9904	103.898	95.4412	92.632
19462	Pxmp3	NM_001163304	2038	16.4052	0.000936417	0.00393853	22.5196	74.1187	48.8538	65.0941	11.8337	21.7018	23.8977	43.122	23.9781	10.5841	85.1853	91.3337	45.8371	23.4481	71.0132	44.8493	56.1046	79.3919	59.5723	60.087	61.3254
26501	Zbtb21	NM_175428	6011	16.3982	0.000939551	0.00395051	19.8553	5.54442	26.4789	18.4343	17.9965	11.6749	25.1642	34.9262	12.2104	17.1594	7.44145	1.51891	7.67289	28.2843	36.0284	24.9587	16.6442	15.7543	19.6888	19.5139	18.7799
3174	Brd9	NM_001024508	2407	16.3968	0.000940151	0.00395183	125.726	200.503	116.361	120.437	111.304	177.443	84.8276	105.477	111.145	164.158	170.012	199.448	232.049	128.798	86.1888	111.302	139.155	110.723	121.994	126.338	122.691
27205	Zscan26	NM_001013786	3990	16.39	0.000943181	0.00396216	45.0022	72.1246	31.1036	80.1308	33.8135	34.7678	55.2808	42.0491	56.6266	47.4753	48.3945	105.187	62.7927	29.1294	12.7213	56.243	26.3208	83.1374	77.8395	78.6482	80.8982
11415	Insr	NM_010568	9355	16.3727	0.000950918	0.00398861	63.8077	44.5259	103.232	108.092	82.7758	90.1243	64.1257	59.7337	47.8529	38.2335	53.2115	26.8864	53.4798	105.989	125.516	89.9558	91.4692	101.286	109.86	109.441	111.781
22758	Sra1	NR_028355	1086	16.368	0.000953036	0.00399387	49.101	156.532	59.6069	112.262	33.6327	40.8762	46.1403	51.4966	52.7619	69.6981	53.0147	343.881	72.7018	46.4353	31.3986	66.7513	93.8424	114.357	108.111	109.407	117.172
23365	Tagln3	NM_019754	1163	16.3636	0.000955031	0.00400102	469.994	446.871	402.718	316.415	584.842	410.466	483.604	580.098	332.852	428.101	463.44	306.172	571.002	441.868	314.908	431.445	422.651	279.178	316.414	323.842	346.226
12024	Klf2	NM_008452	1816	16.3034	0.000982572	0.00409904	1.3757	0	27.4087	5.66456	0	0	0	6.3547	1.89949	0	0	0	0	0	1.43335	4.85964	103.342	6.85363	5.95993	5.68204	4.16263
23568	Tceb1	NM_026456	955	16.28	0.000993532	0.00414226	195.246	346.927	124.992	159.362	113.824	94.3337	278.53	231.453	266.686	186.648	244.857	477.095	318.829	75.6871	53.9673	188.119	182.196	269.436	139.694	124.096	104.221
15205	Nfatc2	NM_001136073	6651	16.2738	0.000996442	0.00415064	0.511339	0.0391783	3.36831	1.63836	1.49773	0.834302	0.211233	0.467142	0.0576265	0	0	0	0.117535	9.06245	2.62214	0.947774	0.840893	0.976345	1.98107	1.20921	2.3868
22495	Sp1	NM_013672	7818	16.2671	0.000999606	0.00416132	21.4376	33.9917	46.2408	60.6922	20.7666	17.8903	28.0934	31.9632	10.1726	19.7398	17.6743	28.7063	55.5946	43.463	48.5434	58.6985	34.2584	56.8964	63.1105	63.8768	58.8851
11687	Kat2a	NM_020004	3048	16.2631	0.00100147	0.00416658	107.628	85.904	87.0534	59.6739	107.506	162.99	94.1829	89.411	76.3278	115.353	121.181	60.1027	76.4284	105.493	86.2532	78.3819	78.0852	44.1185	70.015	61.7331	62.8292
8760	Glis2	NM_031184	3619	16.234	0.00101537	0.004213	21.5067	54.6445	43.4295	24.9274	21.3924	21.1954	40.3732	9.19835	19.4338	17.4474	25.087	77.069	61.7776	52.3537	39.1272	47.5517	34.6855	22.13	26.6559	26.2061	24.7174
7247	Erbb4	NM_010154	4257	16.2301	0.0010172	0.00421933	60.2589	24.7055	70.4054	55.7104	65.6433	64.791	44.5531	68.8142	68.7858	48.9658	19.1424	29.2654	25.7086	56.5791	80.2841	78.777	65.9811	39.47	59.8029	61.4176	62.151
20605	Rreb1	NR_033218	9704	16.1937	0.00103488	0.00428115	0.547364	0.8727	9.38779	7.30478	0.252129	0	1.01343	0.182956	0.138238	1.69743	0	0	2.6181	2.00444	22.5319	5.58649	7.42835	6.49657	7.54064	7.5997	7.58219
22755	Sqstm1	NM_011018	2000	16.1869	0.00103819	0.00429225	147.73	108.279	130.234	76.0118	101.624	125.912	180.531	210.607	150.052	117.656	80.825	129.295	114.718	84.0479	104.769	151.287	180.833	65.4778	78.3507	78.4516	81.7669
2475	Asxl2	NM_172421	8862	16.1731	0.001045	0.00431396	11.0013	14.807	21.2383	33.1047	8.49945	8.36095	10.146	9.51611	14.7263	14.759	13.4432	15.1881	15.7897	13.0609	30.6646	19.4899	21.7378	35.6302	32.3115	32.859	31.6181
26790	Zfp41	NM_011759	3737	16.1392	0.00106185	0.00437703	42.5068	27.4173	82.2007	78.0952	51.6755	32.3177	56.2665	45.4897	48.5118	20.7795	29.6278	30.9733	21.6507	92.9832	84.0026	93.4498	58.3672	67.6967	86.0056	82.7546	75.9238
15209	Nfatc4	NM_001168346	4019	16.0635	0.0011005	0.00451083	0.22956	1.68175	5.00295	3.39107	0.956643	0.0406082	0	0.331315	0	0.0487916	1.54274	0.29313	3.20937	3.40577	2.1373	6.27384	8.19488	1.95236	3.39554	4.2665	3.94989
22492	Sox7	NM_011446	3266	16.0533	0.00110578	0.00452844	0.142691	2.60587	15.8495	21.3238	0.856149	0	0	0	0	0	5.42409	0	2.39352	0	0	2.70211	60.6959	16.3203	22.6931	22.6733	23.6085
23996	Tlr2	NM_011905	2855	16.0334	0.00111627	0.00456543	0.00952739	6.35521	1.74128	1.32581	0	0.0571643	0	0	0	0	2.63709	0	16.4285	0	0	0	6.96512	1.23202	1.64825	1.27561	1.14736
20709	Runx2	NM_001146038	5898	15.9604	0.00115538	0.00469755	0.21741	19.367	3.65575	1.3555	0.0592612	1.2452	0	0	0	0	0.225268	57.8758	0	0	13.7695	0.748143	0.105361	1.23862	1.43614	1.20922	1.53801
7054	Elmsan1	NM_001163502	7261	15.9363	0.00116861	0.00473921	7.3534	22.8155	24.4377	12.18	14.2245	8.24899	8.96489	5.37927	5.33131	1.97147	15.0655	44.9835	8.39754	37.1069	30.8656	11.72	18.0581	11.2535	12.4432	11.9748	13.0483
6878	Efna1	NM_010107	1483	15.8677	0.00120704	0.00486542	0	0.527124	1.57437	3.17512	0	0	0	0	0	0	0	0	1.58137	0	0	0.85012	5.44737	3.64895	3.80775	2.86502	2.37875
22947	Stat3	NM_213659	4487	15.8606	0.00121112	0.00488042	21.0716	36.2466	84.4108	27.535	30.7303	38.3004	24.631	17.212	13.2399	2.31624	15.7923	9.5833	83.3642	79.3142	110.454	75.5819	72.2935	23.6982	32.1967	26.7843	27.4609
6847	Eef1d	NM_029663	2847	15.8571	0.00121312	0.0048846	64.662	78.9319	42.04	40.2964	69.0574	56.1785	52.4723	45.835	61.3884	103.04	45.1121	130.864	60.8191	38.7998	29.0742	53.1392	47.1467	34.2132	42.1484	43.226	41.598
26482	Zbed4	NM_181412	5374	15.8452	0.00121996	0.00490606	11.4687	11.3228	10.5715	35.5761	8.8779	7.56194	6.44853	11.2326	14.5493	20.1421	19.7786	9.31686	4.87305	6.21121	9.54195	11.8472	14.6856	46.018	31.0856	32.6134	32.5874
7068	Elp3	NM_028811	2722	15.8296	0.00122896	0.00493412	94.6702	141.858	72.7814	91.9925	67.6061	80.9426	84.4734	116.751	119.192	99.0554	185.481	100.951	139.142	69.3415	74.6847	53.7269	93.3727	79.2226	96.034	95.6065	97.1069
3686	Cc2d1a	NM_145970	3288	15.826	0.00123101	0.00493701	31.7479	36.0915	21.1916	11.9673	25.8847	55.543	24.3552	21.3286	23.9546	39.4215	25.8614	38.786	43.6273	28.1182	5.85826	36.4262	14.3637	6.08946	14.9559	12.8761	13.9477
15243	Nfkbiz	NM_030612	3854	15.7702	0.00126385	0.00505174	1.28874	0.44445	6.74907	9.39524	1.26967	0.592854	2.79475	1.0365	2.03869	0	0.114914	0.30568	0.912756	3.86313	1.01309	2.12629	19.9938	11.1626	7.99758	9.72515	8.69566
15148	Nelfa	NM_011914	2161	15.7682	0.00126508	0.00505374	114.962	53.9341	140.145	69.718	104.808	127.709	119.405	91.6047	44.0738	202.173	74.5984	34.2088	52.9952	189.243	103.83	126.89	140.617	52.7116	77.3041	76.6795	72.1769
8236	Foxo6	NM_194060	2528	15.762	0.00126879	0.00506711	1.00278	2.76503	14.1737	3.77006	0.414782	3.42161	0	1.40459	0	0.775687	1.05113	3.37862	3.86533	13.1087	13.5914	17.7041	12.2907	2.03355	4.37441	5.58235	3.08992
18706	Ppid	NM_026352	1728	15.7556	0.00127261	0.00508089	82.8437	148.812	55.0472	155.998	33.678	34.2842	91.8719	103	141.288	92.9402	181.969	155.442	109.025	46.4153	38.4118	60.9206	74.4409	212.479	158.492	149.197	103.824
13468	Megf8	NM_001160400	10040	15.7396	0.00128227	0.00511209	28.0653	15.9635	35.677	10.6758	43.7774	46.1003	23.7883	19.6727	18.7056	16.3476	32.2012	2.14145	13.5478	53.1219	41.9482	29.0696	18.5683	6.14441	12.1862	11.7738	12.5989
18962	Prkdc	NM_011159	12674	15.6609	0.00133074	0.00525994	10.172	7.7473	11.2619	23.9136	10.3141	10.0184	18.9553	7.8096	6.22964	7.70511	7.30324	7.08769	8.85099	11.6715	8.50267	14.8713	10.0023	22.0102	25.3035	22.952	25.3887
19818	Rbl2	NM_011250	4888	15.6607	0.00133088	0.00525994	25.4081	38.2581	32.5495	67.178	27.6372	30.8512	22.6104	21.793	20.1909	29.3659	46.2991	35.6102	32.8651	30.8523	16.1887	54.6797	28.4775	78.4917	60.5548	66.3103	63.3553
19400	Ptrf	NM_008986	3217	15.6536	0.00133532	0.00526896	0.0858959	0.0764065	5.50597	3.98813	0	0.101464	0	0.413912	0	0	0.137668	0.0915519	0	0	0	0.195948	21.8279	3.02782	4.38833	3.91506	4.62129
15149	Nelfb	NM_021393	2637	15.6506	0.00133722	0.00527345	61.4996	80.4654	34.4164	53.6971	49.6383	41.3426	62.1562	57.901	101.741	56.218	85.3172	55.7325	100.347	29.7781	43.7283	37.5302	26.6289	57.9719	49.2524	54.149	53.4151
5808	Dab2	NM_023118	4517	15.6382	0.00134505	0.0052953	0.0691171	2.769	5.11282	5.6373	0	0	0.414702	0	0	0	0	0	8.30701	0.584792	1.67115	2.51197	15.6834	5.87023	5.78192	5.20706	5.69
14332	Mpc2	NM_027430	854	15.6348	0.0013472	0.00530076	266.55	222.958	201.512	125.704	136.085	188.048	340.534	309.241	250.43	374.966	183.581	276.589	208.704	201.895	195.375	193.39	215.387	173.621	123.43	78.8926	126.874
27007	Zfp819	NM_028913	2412	15.6335	0.00134801	0.00530092	1.11686	0	3.3527	0.396246	3.11556	0.879625	1.7474	0.552054	0	0.406496	0	0	0	8.86077	3.77711	0	0.77291	0.336529	0.390195	0.440384	0.417874
8122	Flii	NM_022009	4012	15.6029	0.00136759	0.00536269	60.59	80.5059	44.6044	47.3442	73.3545	79.8122	57.8958	58.745	57.3191	36.4132	87.7585	62.7659	90.9933	58.4181	23.0971	50.4354	46.4671	39.5199	50.5528	50.0014	49.3028
13438	Med28	NM_025895	4568	15.5844	0.0013796	0.00540211	50.7943	34.861	65.0625	32.5217	47.4778	54.4133	57.9227	64.9064	48.6224	31.4231	43.2406	21.2123	40.1301	64.9232	55.2732	81.6934	58.3601	26.8319	32.3469	33.9497	36.9582
18514	Pnn	NM_008891	3469	15.552	0.00140084	0.00547137	144.854	277.102	158.898	337.873	88.9676	111.735	108.132	75.8731	282.953	201.464	324.402	244.94	261.964	144.954	168.079	121.748	200.81	431.164	310.574	311.58	298.175
7426	Eya4	NM_010167	4099	15.5228	0.00142027	0.00553322	0.724172	0.036015	3.00954	5.88562	0	0.517603	0	2.05737	0	1.77006	0.108045	0	0	0.585843	2.92111	2.92191	5.6093	6.13881	5.56792	5.627	6.20878
11227	Ikzf4	NM_011772	3580	15.4915	0.00144135	0.00560588	47.8618	90.8687	58.7774	36.2835	82.3526	34.6923	67.8908	24.7962	52.3522	25.0868	101.936	98.3935	72.2768	77.0048	23.9938	68.671	65.44	26.6791	42.2597	37.3426	38.8525
26360	Xbp1	NM_013842	1800	15.4864	0.00144484	0.00561568	139.628	87.5578	114.68	78.6099	110.488	148.153	83.7741	160.033	163.85	171.473	79.9638	77.3939	105.316	102.725	112.651	118.368	124.974	74.106	84.1806	79.1597	76.9933
1447	Adora2a	NM_009630	2534	15.4784	0.0014503	0.00563278	0.431218	0	11.394	1.26546	0	0	2.58731	0	0	0	0	0	0	0.0947659	25.3723	0	20.1091	0.427103	1.48564	1.85638	1.2927
10655	Hist2h2ab	NM_178213	393	15.4307	0.00148327	0.00574953	57.379	11.8154	95.1983	12.3288	63.1453	88.8695	109.628	25.976	31.2081	25.4473	1.12691	1.49884	32.8205	130.762	170.219	52.9314	26.8807	10.3271	14.9674	11.1974	12.8233
2796	Bag1	NM_009736	1348	15.4039	0.00150207	0.00581105	275.192	400.654	227.958	216.644	335.002	239.963	289.041	253.864	225.756	307.524	191.869	642.138	367.956	232.655	323.247	165.541	190.39	218.182	206.837	223.788	217.77
13457	Mef2d	NM_133665	2459	15.3853	0.00151532	0.00585085	35.3742	19.7498	78.7788	19.4119	71.4965	78.3831	13.1407	18.9526	11.612	18.6604	23.0534	24.4337	11.7624	93.2618	136.129	39.4779	46.2464	15.5146	19.6153	20.179	22.3388
18890	Prdm6	NM_001033281	2601	15.3706	0.00152586	0.00588499	0.330231	3.86264	0.371366	7.45656	0.6719	1.12944	0.180047	0	0	0	10.046	0.339703	1.20219	0	1.00076	0.484709	0	5.51334	6.78453	8.80943	8.71896
10608	Hist1h2ai	NM_178182	393	15.3377	0.00154964	0.00596175	4.83534	0.66304	20.1633	3.24762	6.22559	4.98333	8.34127	4.51757	1.9505	2.9938	0	0	1.98912	24.4414	33.779	20.8517	1.58122	4.13083	3.59218	2.70282	2.56466
8235	Foxo4	NM_018789	3161	15.3222	0.00156104	0.00599228	2.82347	0	5.07672	2.89369	0.774014	1.54892	1.03705	12.2161	0	1.36478	0	0	0	0.53178	14.4106	3.98839	1.37613	1.96871	3.42399	3.31235	2.86973
24429	Tnfrsf11a	NM_009399	5022	15.3048	0.00157383	0.00602967	2.72185	0	0.939461	1.56229	1.21797	2.20985	0	3.88878	0.228957	8.78556	0	0	0	1.62578	0	2.00833	0.123739	2.1012	1.45239	1.69209	1.0035
2660	Atxn7l3	NM_001098836	3707	15.2546	0.00161149	0.0061426	100.868	80.2369	86.2378	51.322	149.775	108.172	90.1991	78.3056	49.5764	129.177	103.461	89.0638	48.1856	121.267	83.4887	74.6506	65.5449	49.7054	56.172	49.8581	49.5527
10609	Hist1h2ak	NM_178183	393	15.2364	0.00162538	0.00618437	27.2914	3.3152	142.923	10.822	86.7136	58.1389	4.76644	5.64696	0	8.48242	0	0	9.9456	285.353	243.076	40.0995	3.16244	3.44236	17.3622	11.5835	10.8998
10584	Hip1	NM_146001	7855	15.2073	0.00164783	0.00625435	39.2501	35.1488	49.0709	95.3006	44.1409	36.5054	34.0421	47.0126	43.7679	30.0319	60.7229	13.7231	31.0003	38.8254	22.0697	68.9348	66.4535	87.7327	103.161	94.0406	96.2681
11925	Khdrbs1	NM_011317	2684	15.2077	0.00164747	0.00625435	217.342	137.694	341.294	256.738	256.412	233.983	223.857	207.042	235.833	146.924	123.59	160.758	128.734	363.695	414.496	298.272	288.715	226.416	267.81	262.442	270.285
10598	Hist1h1e	NM_015787	1930	15.2057	0.001649	0.00625708	105.246	53.5967	230.431	56.7376	164.801	95.8085	121.807	178.69	10.6244	59.7425	40.1572	7.01971	113.613	289.782	282.685	197.928	151.33	23.2718	79.9734	60.7762	62.9292
20221	Rit2	NM_009065	1802	15.2024	0.00165161	0.00626525	133.704	95.4695	56.7586	57.1994	151.389	274.06	66.0094	109.854	87.6298	113.282	193.175	50.5036	42.7302	109.008	46.8014	37.4301	33.7953	52.7025	67.8965	59.9565	48.2422
13475	Meis1	NM_001193271	3441	15.1686	0.00167811	0.00634839	101.507	158.566	254.454	200.543	96.04	131.142	163.314	114.542	61.2058	42.7975	114.162	214.665	146.872	169.443	269.299	286.513	292.56	179.436	197.885	210.88	213.973
19133	Prrxl1	NM_001001796	1550	15.1503	0.00169259	0.00639793	3.55654	0	0.48415	0.951875	8.45619	4.63289	1.20852	6.29982	0.74182	0	0	0	0	0.309854	0	1.62675	0	1.57105	0.607194	0.978993	0.650266
11371	Ing4	NM_133345	1617	15.0973	0.00173534	0.00653276	40.2647	104.818	89.3649	88.3598	32.4233	43.2991	52.7094	37.6052	41.7169	33.8343	73.6758	82.6921	158.085	64.0068	49.4193	108.374	135.659	82.9947	81.4849	93.2798	95.6799
26727	Zfp280d	NM_146224	4361	15.0919	0.00173975	0.0065476	87.7675	90.6594	116.69	228.773	55.9829	56.4722	62.9272	104.22	107.925	139.078	114.553	71.1149	86.3106	54.6792	86.1886	161.169	164.724	263.931	211.818	218.969	220.372
13435	Med25	NM_029365	2271	15.0805	0.00174909	0.00657918	38.5837	41.5671	98.014	17.856	34.3212	69.6367	48.6655	58.8284	6.66637	13.3838	20.2815	7.52193	96.898	120.65	148.544	77.1648	45.6966	10.127	21.8607	18.9095	20.5266
26426	Ybx1	NM_011732	2191	15.078	0.00175116	0.00658516	615.346	878.996	517.889	1133.56	521.572	429.798	542.684	530.15	952.325	715.549	948.415	1055.63	632.943	676.241	567.045	365.962	462.307	1295.55	1005.91	1125.51	1107.28
19324	Pthlh	NM_008970	1512	15.0347	0.00178726	0.00670453	7.39731	0	1.34016	0.986461	13.6388	13.0607	0	2.34842	15.336	0	0	0	0	0	0	1.25072	4.10992	1.25264	1.08929	1.10396	0.499956
14210	Mllt6	NM_139311	7271	15.0299	0.00179124	0.00671583	22.6708	20.9051	62.821	28.789	44.9462	25.9475	26.3424	19.1678	14.4696	5.15113	34.536	10.9772	17.202	87.2234	81.4792	43.6946	38.8868	26.0485	29.1237	30.9081	29.0757
11853	Kctd1	NM_001142731	3455	15.0147	0.00180412	0.00675312	36.5746	10.3392	47.4708	36.7171	35.3063	48.1346	18.1628	26.9779	51.3066	39.5593	4.74282	6.13766	20.137	50.6685	70.9695	30.834	37.4111	36.7285	38.8854	35.8827	35.3717
13037	Maf1	NM_001164607	1749	14.9981	0.00181824	0.00679129	61.4529	118.263	148	101.866	61.6511	43.1105	47.1248	62.6823	82.5058	71.6431	97.7418	129.664	127.382	107.368	169.81	176.963	137.856	90.8087	94.3033	108.537	113.815
15596	Npas4	NM_153553	3277	14.9703	0.00184219	0.00687148	10.4118	20.9226	15.849	3.0341	16.1589	1.7431	9.5747	17.4723	10.7602	6.76185	19.326	11.9535	31.4884	10.0393	2.38294	10.7722	40.2017	2.22929	3.58998	3.2414	3.07572
6041	Dedd2	NM_207677	1828	14.9656	0.00184629	0.00688306	6.33546	0	9.06062	5.52303	3.34609	9.0173	14.8586	10.6835	0	0.107272	0	0	0	1.18229	1.70873	26.5525	6.7989	4.73645	4.76238	5.97678	6.61649
6360	Dnaja3	NM_023646	2643	14.9658	0.00184607	0.00688306	30.5044	70.0558	27.3252	25.3771	54.5509	34.4563	15.9467	32.4114	30.5256	15.1355	25.9727	158.906	25.2885	22.8961	27.4774	26.9509	31.9762	26.1049	23.9472	23.9988	27.4573
18281	Pknox2	NM_001029838	3491	14.9438	0.0018653	0.00694195	15.7271	12.0402	55.5607	25.8224	19.3734	31.042	6.30485	16.9098	4.61114	16.1211	21.0592	12.4862	2.57514	82.82	51.0751	29.0715	59.2761	25.0341	26.1505	25.2544	26.8507
18532	Pnrc2	NM_026383	1907	14.9262	0.00188082	0.0069836	40.69	76.341	48.5352	189.113	14.2045	15.747	9.0861	29.7918	35.8754	139.435	76.4061	103.631	48.9859	21.2811	50.6398	70.4078	51.8121	254.253	186.552	175.058	140.59
3635	Cat	NM_009804	2551	14.9223	0.00188429	0.00698897	170.496	223.009	128.531	280.062	114.886	140.365	189.634	231.06	170.002	177.03	230.726	282.169	156.13	108.725	139.587	140.603	125.21	428.075	233.627	228.002	230.544
25586	Uty	NM_009484	5228	14.9172	0.00188876	0.00700181	5.12631	0.244121	9.16441	30.2031	8.89183	3.65243	0	8.57479	0.0366559	9.60214	0	0.732363	0	8.03825	9.95779	0	18.6616	41.0926	32.1788	10.1879	37.3533
23335	Taf13	NM_025444	1289	14.8813	0.00192097	0.0071022	103.07	163.334	56.5639	185.841	73.2127	52.7976	63.2154	153.575	230.589	45.03	108.228	228.946	152.827	46.2017	42.4068	85.5809	52.0662	235.725	163.551	180.468	163.62
19014	Prmt7	NM_145404	2254	14.8625	0.001938	0.00715751	63.8925	46.5899	38.9401	26.4858	73.347	82.9054	55.2655	58.4844	78.8143	34.5382	64.447	13.5893	61.7333	44.2133	28.1776	27.1275	56.2421	20.6468	27.3493	28.8812	29.0658
6699	Dyrk1b	NM_001037957	2520	14.8422	0.00195655	0.00721066	24.3559	6.53917	69.4515	14.9075	62.8309	36.8505	19.8843	6.1646	2.58558	17.8196	4.92085	0.116874	14.5798	97.103	117.34	51.2796	12.0832	8.37477	18.5802	15.7765	16.8985
9892	Gper1	NM_029771	2507	14.7903	0.00200489	0.00736331	0.185892	0	4.63052	2.98387	1.11535	0	0	0	0	0	0	0	0	0.478933	0	13.8293	4.21385	2.48229	4.3172	2.72376	2.41223
18031	Phf1	NM_009343	2429	14.7682	0.00202587	0.00743051	31.496	33.3046	41.6149	7.98663	40.075	69.8775	13.6886	33.9878	12.86	18.4872	33.0015	2.5463	64.3659	62.6788	31.2913	42.3011	30.1884	5.34678	8.62107	8.74605	9.23262
13155	Map3k7	NM_009316	5760	14.7504	0.00204291	0.00747914	31.3267	39.7068	60.8862	77.4899	34.2848	29.1558	38.4561	24.6584	44.3493	17.0561	52.8992	23.6743	42.547	59.9508	75.9651	50.3416	57.2871	78.2585	76.7135	79.6129	75.3747
14766	Myef2	NM_010852	2999	14.7429	0.00205007	0.00749942	119.221	154.261	144.338	292.742	76.2796	98.4449	173.017	142.376	145.501	79.7059	139.11	215.368	108.305	95.4462	101.202	208.72	171.983	307.109	273.495	297.72	292.644
13253	Mars	NM_001171582	2962	14.72	0.00207224	0.00756853	85.362	91.7652	62.6102	50.8779	66.3173	72.7862	76.0478	53.1962	142.401	101.423	84.329	61.2511	129.716	49.13	68.0181	78.9552	54.3375	40.284	53.7777	55.1749	54.2748
23128	Supt16	NM_033618	4491	14.6895	0.00210213	0.00766353	112.216	144.811	179.461	260	126.664	123.012	110.011	116.028	134.927	62.6574	144.47	161.591	128.373	147.74	259.659	181.207	129.238	264.967	259.073	256.184	259.777
22474	Sox11	NM_009234	8451	14.6671	0.00212439	0.00773248	824.088	878.773	1106.62	1993.93	670.653	489.207	1013.24	949.624	1031.84	789.967	1114.55	685.372	836.392	686.085	782.831	1692.68	1264.9	2532.52	1793.74	1876.54	1772.94
26770	Zfp37	NM_009554	3579	14.6046	0.0021877	0.00792127	54.7653	106.825	69.0187	129.9	39.6008	37.1188	59.6664	46.0097	48.7793	97.4167	118.422	131.831	70.222	43.3441	66.1833	88.2404	78.3069	176.449	127.143	112.653	103.354
2327	Armcx3	NM_027870	3385	14.5847	0.00220828	0.00798951	9.34537	22.2621	4.7476	9.77535	4.38839	7.08745	5.6722	6.03166	25.4195	7.47299	25.9053	25.7544	15.1264	3.90178	3.61416	6.5178	4.95667	10.4711	10.1483	9.77258	8.70943
18879	Prdm10	NM_001080817	3408	14.5695	0.00222405	0.00803189	14.6437	6.65847	38.6358	23.6665	32.7165	19.3949	12.9168	8.33524	2.53042	11.9682	10.0063	4.23462	5.73448	39.9523	29.1001	36.6233	48.8675	15.4815	24.4401	28.4965	26.2477
22822	Srsf5	NM_001079695	1653	14.5615	0.00223247	0.00805807	311.794	306.444	510.415	693.22	363.267	385.746	208.229	272.809	357.073	283.642	309.987	302.897	306.447	592.57	744.83	327.576	376.686	729.539	657.467	717.134	668.74
26492	Zbtb16	NM_001033324	5114	14.5606	0.00223338	0.00805926	1.09789	10.4148	11.4984	7.99117	4.20329	1.2127	0.824154	0.347166	0	0	17.3202	11.1727	2.75147	9.39135	21.0721	6.9027	8.62745	6.61345	8.28153	8.54561	8.52409
19737	Rarb	NM_011243	2774	14.5213	0.00227502	0.00818962	2.8071	20.9667	4.18533	7.77139	3.08699	3.23584	0.506456	2.88007	0.276333	6.85691	2.55444	53.7233	6.6224	7.96416	1.31368	4.99928	2.46417	8.09563	7.46406	7.98652	7.53936
12567	Lims1	NM_001193303	4472	14.514	0.00228281	0.00820704	22.288	26.3829	27.9495	79.3052	11.5283	14.1964	23.1429	22.3315	16.9696	45.5593	31.8887	4.08327	43.1766	20.5663	14.9007	32.4203	43.9107	86.3983	80.4986	74.9897	75.3342
10747	Hnrnpa2b1	NM_016806	4085	14.5053	0.00229218	0.00823281	679.916	1252.58	737.831	1673.24	332.111	316.82	622.837	578.799	1344.18	884.749	1434.55	1237.57	1085.61	514.193	687.476	885.751	863.903	2405.12	1396.29	1530.25	1361.3
19790	Rb1cc1	NM_009826	7046	14.5057	0.00229166	0.00823281	58.0476	69.4561	68.303	134.932	40.7512	49.5218	55.4307	54.3633	88.8286	59.3903	94.2197	59.2305	54.9182	42.7039	44.1832	91.0745	95.2502	155.368	129.665	126.74	127.956
26900	Zfp628	NM_170759	3524	14.4643	0.0023367	0.00836235	16.3696	11.165	38.584	5.16191	21.1261	20.1921	12.2258	28.339	1.08761	15.2468	29.9105	1.58795	1.99646	71.8911	32.5002	27.726	22.2187	2.45693	6.34288	5.77006	6.07779
22840	Ssbp3	NM_023672	3195	14.4563	0.0023455	0.00838952	176.813	121.708	304.147	169.396	267.913	222.765	182.191	145.45	123.919	118.638	140.279	44.1553	180.69	333.11	362.46	257.473	263.544	130.839	187.715	180.24	178.79
12560	Limd1	NM_013860	4851	14.4459	0.00235693	0.00842605	2.14075	3.9084	16.916	15.0436	5.87221	3.49892	3.0892	0.182994	0.0395046	0.161693	6.11683	1.82141	3.78696	7.57389	23.556	28.8478	7.68608	14.0556	13.7263	17.1732	15.2194
5982	Ddrgk1	NM_029832	1101	14.4239	0.00238139	0.00850469	44.0071	119.8	46.5088	39.5731	55.5554	65.3706	29.774	57.6483	40.5553	15.1389	63.9577	225.506	69.9363	53.8727	68.7978	50.3833	12.9815	27.0324	41.8859	44.5171	44.8571
24805	Trim8	NM_053100	3241	14.4188	0.00238716	0.00851572	91.936	86.3386	123.04	60.1761	104.231	85.5551	113.572	78.1978	86.5648	83.4956	59.3053	64.157	135.554	93.58	96.2158	121.366	181	62.696	60.0379	58.5719	59.3987
27000	Zfp808	NM_001039239	3114	14.4191	0.00238684	0.00851572	0.71752	1.77081	1.40255	7.67418	0.224485	0.262049	0.150386	2.42308	0.615404	0.629716	2.7022	1.22954	1.3807	0.0771152	1.50461	2.63158	1.3969	7.64615	9.21807	7.60181	6.23067
11150	Ift74	NM_026319	2114	14.3948	0.00241413	0.00858399	31.6897	24.0691	32.78	114.61	15.459	8.95539	10.8547	22.4655	78.2321	54.1716	17.8072	8.91648	45.4835	25.8993	34.5995	46.5169	24.1043	136.309	108.851	108.03	105.249
22622	Spg20	NM_001144987	3995	14.3719	0.00244031	0.00867038	2.56137	2.9974	5.65606	18.5961	1.3561	1.55238	3.75111	7.22161	1.48705	0	3.10402	3.83358	2.05459	4.5082	7.16712	4.26028	6.68862	18.2186	18.3754	19.7514	18.039
26797	Zfp422	NM_026057	3165	14.3706	0.00244174	0.00867102	69.5133	98.2085	89.4297	218.688	30.8662	35.941	58.0015	56.6559	130.846	104.769	66.1866	146.191	82.2478	50.7588	86.6833	95.6003	124.677	287.924	191.427	193.264	202.14
22839	Ssbp2	NM_024272	6656	14.3482	0.00246756	0.008747	76.8495	105.608	61.7526	82.8265	74.3051	60.3679	63.8147	106.828	91.6437	64.137	79.1802	117.437	120.207	73.3832	45.9117	72.0714	55.6439	73.8619	86.6067	83.2357	87.6017
7190	Epc2	NM_172663	4358	14.3227	0.0024972	0.00883852	87.6247	109.56	133.066	218.102	79.9619	72.09	63.5078	105.208	84.1655	120.815	179.874	50.4162	98.3882	105.632	161.207	104.579	160.845	234.684	214.07	214.175	209.481
22081	Smad4	NM_008540	3341	14.2717	0.00255769	0.00900885	26.2922	24.2245	63.3223	90.6809	52.2558	17.9764	22.9876	24.9758	12.6764	26.8814	60.4465	6.61155	5.6155	46.7192	63.964	87.9227	54.6834	79.8508	90.3544	94.9251	97.5934
23801	Tfr2	NM_015799	2926	14.2672	0.00256316	0.00902583	5.9109	10.7417	14.1578	2.71415	5.61434	2.4542	5.44166	9.10153	6.35297	6.50071	19.6767	5.33482	7.21345	15.8395	19.8381	9.91003	11.0437	2.86659	2.81444	2.33372	2.84186
18019	Phb	NM_008831	1798	14.2375	0.00259912	0.00912227	52.3189	48.7031	29.9511	17.9359	29.1593	58.2742	39.0686	56.7774	66.6146	64.0194	29.8043	93.6968	22.6083	39.266	6.36989	38.9157	35.2529	17.7571	17.4045	16.5416	20.0405
19661	Rai1	NM_001037764	7125	14.2189	0.00262181	0.00918564	55.7871	46.9987	83.4182	42.5144	58.7443	73.5049	68.2243	29.2786	62.6417	42.3287	59.6718	31.7878	49.5366	79.0682	74.0521	80.8636	99.6888	30.8734	45.0101	45.1931	48.981
15737	Nr4a3	NM_015743	1884	14.2021	0.00264258	0.0092529	0.42134	2.10606	4.88248	7.617	0.742086	0	1.24284	0.23559	0.203436	0.104084	5.64174	0.468985	0.207464	4.07876	0.82897	7.69553	6.92665	5.60096	8.86699	8.37652	7.62354
7263	Erf	NM_010155	3502	14.1746	0.00267692	0.00934088	0.33349	0.0372037	4.69805	1.68177	0.0998066	0	0	1.90113	0	0	0	0	0.111611	7.06285	3.64207	7.20005	0.887235	0.618092	2.62028	1.68989	1.79881
26152	Wbp2	NM_016852	1795	14.1698	0.00268286	0.00935434	149.89	122.194	171.297	75.651	140.198	256.581	170.624	120.421	121.281	90.2358	110.041	41.8402	214.702	183.28	190.256	151.709	159.942	60.5955	88.2164	74.8998	78.8923
6834	Edn1	NM_010104	2344	14.153	0.00270413	0.00941449	5.40482	46.6874	2.05461	2.46718	1.78937	0	0.599364	1.51485	0.0817564	28.4436	12.0922	86.9495	41.0205	0	0	0	8.21843	1.61603	2.91098	2.65422	2.68748
25374	Ufl1	NM_026194	4334	14.15	0.00270788	0.00942329	21.78	35.598	33.657	63.3893	28.2667	19.6191	19.8818	20.9943	26.3534	15.5644	21.2548	23.8526	61.6866	19.8914	37.1767	39.7068	37.853	83.5931	56.2432	56.8602	56.8607
11340	Ilf3	NM_010561	3457	14.1135	0.00275468	0.00955824	145.127	126.625	269.122	134.884	254.685	169.389	152.669	101.815	64.692	127.515	134.516	80.851	164.508	320.229	323.846	222.278	210.136	98.7732	141.431	152.095	147.236
26997	Zfp800	NM_001081678	3895	14.092	0.00278255	0.00964627	16.0515	44.7904	28.8721	47.9903	14.8962	17.9336	21.6417	14.1303	20.9103	6.79657	85.9601	30.5487	17.8623	12.5155	25.9963	39.1651	37.8117	58.8376	45.3057	43.4389	44.3792
8184	Fnip1	NM_173753	6281	14.0903	0.00278474	0.00964904	9.53978	17.2328	16.9886	32.9155	9.9331	15.6422	7.90321	8.97454	5.91905	8.86652	33.8451	8.58105	9.27217	8.90812	12.847	27.5991	18.6	33.2989	32.5529	33.1947	32.6155
6925	Ehmt1	NM_001012518	5083	14.0521	0.00283512	0.00980396	64.9701	113.227	76.0776	104.015	55.148	49.3177	67.1636	68.8961	74.7622	74.5333	150.646	95.8371	93.1979	76.0142	68.518	85.5698	74.2085	87.7235	111.233	103.979	113.125
5986	Ddx11	NM_001003919	4150	14.0245	0.00287205	0.00991187	0.357787	8.32306	1.82366	2.15157	0.631667	0.511242	0.789908	0.213904	0	0	0.106717	24.7683	0.0941837	0.173593	2.88522	3.0379	1.19792	2.21671	1.98435	2.52297	1.88225
8196	Fosl1	NM_010235	1705	14.0223	0.0028749	0.00991922	4.93391	0.15283	10.6425	3.04873	13.5299	4.116	2.19731	0	0.674382	9.08586	0	0	0.458489	16.4786	16.1827	4.8063	5.10257	1.9043	3.03597	3.55997	3.69469
17667	Pcif1	NM_146129	2752	14.017	0.00288205	0.00993647	22.1564	35.3227	60.0294	20.0081	29.4656	18.0284	36.2458	18.5476	5.64048	25.0105	29.6109	18.8357	57.5215	86.1247	75.4785	43.0627	35.4516	14.1577	20.7758	23.7651	21.3339
22105	Smarcc2	NM_001114096	4686	13.9829	0.00292856	0.0100667	303.352	230.706	503.616	318.513	398.005	449.038	315.6	212.738	227.38	217.352	246.106	172.842	273.17	527.471	597.083	407.732	482.177	286.852	337.416	326.771	323.011
23726	Tet1	NM_027384	13985	13.9776	0.00293576	0.0100865	33.0166	45.5599	44.4174	79.4535	38.5512	28.5564	14.4325	30.5634	37.3271	48.6694	64.9827	36.2862	35.411	39.6136	34.4332	50.1677	53.455	82.5929	79.8817	76.9082	78.4312
24004	Tlx1	NM_021901	2029	13.9726	0.00294267	0.0101052	0.361961	0	10.0082	4.74131	0	2.17177	0	0	0	0	0	0	0	31.9551	0	8.07761	0	5.60075	2.43521	6.95524	3.97402
21283	Sfpq	NM_023603	3487	13.9665	0.00295111	0.0101317	303.585	490.623	390.784	662.712	207.438	216.42	273.434	242.737	459.995	421.486	434.24	449.934	587.694	330.972	397.798	438.561	395.805	726.821	615.783	668.726	639.52
6941	Eif2a	NM_001005509	2299	13.9607	0.00295914	0.0101517	56.7066	38.4229	113.99	137.62	41.2008	76.7393	34.8324	76.839	66.0185	44.6094	51.8198	7.1741	56.2746	104.035	179.57	107.483	64.872	149.82	130.283	133.923	136.456
26701	Zfp229	NM_001164676	4525	13.9557	0.00296604	0.0101678	4.2224	8.53016	9.90754	23.7633	5.79319	5.08548	3.62223	5.39488	4.65858	0.780041	6.65538	13.1477	5.78735	2.01662	3.79659	21.7319	12.0851	27.2662	23.7627	21.0262	22.9982
24763	Trim37	NM_197987	5631	13.9285	0.00300412	0.0102831	162.815	122.627	111.016	154.456	148.164	151.379	166.081	152.365	198.852	160.051	151.873	103.352	112.657	129.685	107.983	102.99	103.404	144.15	158.613	155.49	159.573
20129	Rhoq	NM_145491	4122	13.9267	0.00300671	0.0102894	11.2154	8.84901	7.49246	30.141	4.6213	13.1846	11.4747	16.3672	8.22895	13.4154	16.9759	3.78692	5.78423	4.60233	2.58907	11.6224	11.156	30.654	28.5975	29.7082	31.6042
8195	Fosb	NM_008036	3776	13.9234	0.00301134	0.0103027	31.3339	105.517	38.8252	7.01273	7.35886	0.777986	34.7258	70.057	20.5035	54.5801	109.664	153.579	53.3088	1.33551	0.0689345	36.3929	117.504	4.72923	10.406	6.30927	6.60641
25288	Ube2o	NM_173755	5192	13.9091	0.00303156	0.0103668	74.3274	52.4476	55.6968	41.1334	93.5404	81.885	61.5143	68.732	46.2114	94.0811	47.0002	60.1298	50.2128	91.6239	40.358	47.9572	42.8483	24.2846	50.7554	45.1841	44.3097
27090	Zfx	NM_001044386	7002	13.8928	0.0030547	0.010433	14.5291	11.1836	28.6375	51.1581	16.6475	17.3413	9.69778	15.9741	25.9457	1.5683	15.8758	1.59838	16.0766	18.0737	35.3531	29.5286	31.5946	53.0165	48.825	50.6463	52.1445
15747	Nrarp	NM_025980	2575	13.8823	0.00306977	0.0104741	3.72487	2.37421	17.2827	25.9021	0.88229	1.77465	4.1829	2.06843	11.461	1.97997	6.36366	0	0.758956	5.22239	5.35756	44.5539	13.997	24.7978	27.0466	26.2237	25.5403
7422	Eya2	NM_010165	2364	13.8806	0.00307233	0.0104794	3.95805	0.834031	21.7992	8.06793	2.06993	4.76357	4.35815	1.12653	11.4301	0	0.187342	0	2.31475	12.596	43.603	17.0657	13.932	8.01179	7.36518	8.79396	8.10081
21999	Slc9a1	NM_016981	4606	13.8537	0.00311126	0.0105974	37.9797	32.257	40.5284	12.8272	59.3414	61.0156	21.7579	33.0528	8.94528	43.7656	55.3836	13.0444	28.343	83	31.534	25.3186	22.261	8.45897	15.7846	13.9357	13.1296
12003	Kit	NM_001122733	5181	13.8515	0.00311437	0.0106034	26.6117	41.415	99.1002	61.8933	32.6518	80.5783	7.77341	21.2459	10.9486	6.47211	49.7499	43.7151	30.7801	121.76	100.632	99.5248	74.484	46.9489	67.6208	65.2549	67.7486
20067	Rgma	NM_177740	3586	13.8324	0.00314241	0.0106746	110.367	187.617	121.878	130.495	138.454	119.968	118.316	101.989	93.4137	90.0631	252.931	108.495	201.426	122.211	130.729	142.034	92.5371	96.0499	158.127	130.29	137.513
18280	Pknox1	NR_027493	4459	13.8037	0.00318489	0.010803	29.3477	8.80482	40.1975	34.7522	34.6074	31.3305	30.0369	44.6937	22.0045	13.413	17.1827	1.25497	7.97678	36.7287	39.1116	54.5684	30.3811	27.063	36.4619	36.3791	39.1049
4490	Cflar	NM_207653	6911	13.7994	0.00319129	0.0108221	0.52809	0.0854438	2.80303	8.54385	0	3.14081	0	0	0.0277293	0	0.256331	0	0	0.277976	5.49896	2.82756	2.60761	6.69475	8.54539	9.30971	9.62555
24933	Tsc2	NM_011647	6147	13.7934	0.00320026	0.0108499	82.5822	63.9032	99.493	57.5377	118.981	92.262	90.0494	72.6394	71.86	49.7013	73.0563	37.8993	80.754	106.259	104.932	97.0107	89.7707	46.1293	64.4581	59.7151	59.8484
24758	Trim33	NM_053170	8868	13.7928	0.00320121	0.0108504	69.3111	72.9429	105.14	157.38	56.5984	78.4551	58.9339	62.6137	63.2091	96.0567	74.5619	53.471	90.7957	93.3414	167.22	85.2286	74.7694	180.624	149.482	150.067	149.346
3112	Bmpr2	NM_007561	3507	13.783	0.00321596	0.010893	218.69	224.257	248.22	431.806	227.434	243.154	223.001	218.192	244.86	155.499	285.906	206.09	180.775	188.439	222.666	215.694	366.083	457.739	430.119	422.564	416.802
12167	Kmt2b	NM_029274	8457	13.7828	0.00321614	0.010893	36.519	19.994	53.4713	23.6074	52.9223	51.9505	24.3094	17.7918	33.6957	38.4443	30.8972	5.46766	23.6172	58.8629	80.4251	42.4864	32.1107	16.6367	27.0148	24.6178	26.1602
2699	AW146154	NM_001033530	3411	13.7698	0.00323577	0.0109464	0.540114	0.18665	0.340382	3.19348	0.461112	0.0478464	0	0.390371	0.674185	1.66717	0.129838	0.0863449	0.343766	0.211202	0.228933	0.739213	0.182181	3.09358	3.65589	3.06958	2.95489
20969	Scx	NM_198885	1136	13.7548	0.00325866	0.0110101	0.307678	0	6.18059	2.78086	1.84607	0	0	0	0	0	0	0	0	10.358	0	9.98817	4.37619	3.81084	2.69255	1.73651	2.88355
4634	Chuk	NM_007700	3500	13.7528	0.00326167	0.0110149	27.8702	36.0906	56.3702	75.1663	37.0494	21.1699	29.0348	35.3813	22.1751	22.4107	47.8307	17.3347	43.1065	49.7426	40.1601	45.2061	90.3722	83.4127	68.2334	76.3055	72.7136
13450	Med9	NM_138675	3013	13.6858	0.00336553	0.0113022	33.3851	9.80946	41.9614	15.4827	31.3213	11.3208	31.8626	34.7656	64.8118	26.2283	2.93977	12.2188	14.2698	28.9312	88.2918	35.5665	15.056	13.5599	15.8524	14.4542	18.0641
22390	Snw1	NM_025507	2257	13.6724	0.00338671	0.0113651	60.5219	82.599	58.7461	130.197	68.9134	62.1868	47.7225	68.2394	45.0861	70.9829	69.4632	102.828	75.5055	55.007	44.9782	83.7879	51.2114	151.409	121.345	123.775	124.259
24755	Trim32	NM_001161782	3193	13.6708	0.00338927	0.0113709	154.309	218.047	123.292	137.082	186.146	210.791	176.292	139.981	56.6568	155.991	262.286	199.423	192.432	176.211	102.064	98.3155	116.577	149.817	137.134	126.271	135.104
4638	Ciart	NM_001033302	1395	13.6517	0.00341969	0.0114453	7.18629	47.539	9.33378	5.77695	4.63525	7.72149	9.39962	16.8632	0	4.4982	3.49222	137.444	1.68113	1.37713	5.97096	9.94123	20.0458	5.43079	4.21662	5.87396	7.58643
22504	Sp4	NM_009239	5770	13.6508	0.00342107	0.0114471	28.8553	39.5754	58.9482	75.3578	22.9582	41.2395	34.4937	25.4618	37.7296	11.249	50.0443	42.06	26.622	44.4898	48.8113	76.3648	66.1268	78.4511	71.4018	73.321	78.2573
13483	Meis3	NM_008627	1780	13.6492	0.00342368	0.0114531	144.147	123.166	209.872	67.5095	245.059	248.382	148.91	127.919	48.1246	46.4896	106.241	53.1133	210.143	238.788	302.705	161.841	136.154	48.9457	75.4771	71.0127	74.6025
13040	Mafa	NM_194350	1080	13.6442	0.00343171	0.0114744	6.59626	0.683452	1.39943	0.580632	12.1362	6.19572	3.46891	6.1646	8.16231	3.4498	2.05035	0	0	2.22349	3.37422	0	0	0.501055	1.30715	0.281007	0.233313
18823	Ppp3r1	NM_024459	2829	13.6212	0.00346879	0.0115788	339.545	316.379	237.006	254.35	316.102	304.659	329.418	434.595	275.838	376.661	399.356	139.713	410.067	233.261	201.226	230.175	283.362	315.043	243.937	227.374	231.047
8241	Foxp4	NM_001110824	4025	13.6157	0.00347781	0.0116005	44.7305	17.4074	35.605	13.8687	81.0198	57.1316	37.6969	20.952	43.3742	28.2082	24.9771	1.31712	25.928	63.6586	42.2942	23.9617	12.5056	8.20111	15.3156	15.1178	16.8403
8488	Galr1	NM_008082	2871	13.5861	0.0035262	0.0117292	0.869477	0	6.52071	2.57995	0	4.37712	0	0.772991	0.0667492	0	0	0	0	9.117	0.0906641	14.7107	2.16447	3.20424	2.21274	1.47991	3.4229
12637	Lmo1	NM_057173	1071	13.5648	0.00356164	0.0118147	4.59417	0.413517	8.00472	39.2892	0.652703	21.4863	5.24709	0	0.178933	0	1.24055	0	0	15.471	2.43041	13.5372	0.580224	28.8001	38.6654	39.8133	49.878
26844	Zfp523	NM_172617	2711	13.5544	0.003579	0.011864	90.739	84.3264	62.7309	28.9931	73.0375	51.592	58.5594	44.205	21.4894	295.551	70.246	113.529	69.2047	81.8467	22.3715	64.8733	81.8321	18.364	31.8519	32.0168	33.7396
22476	Sox13	NM_011439	3531	13.5318	0.0036169	0.0119607	4.43628	17.313	12.7558	7.80411	4.60289	4.11361	5.17242	4.65095	1.30255	6.77525	17.3087	20.0185	14.6117	9.72517	12.1634	6.78387	22.3507	4.36773	8.46262	8.6809	9.70518
7513	Fam120b	NR_033586	5830	13.5061	0.00366061	0.0120908	58.798	69.4621	40.0927	68.0306	58.3937	53.8602	63.7791	65.3976	49.5692	61.788	94.3487	42.4355	71.6022	25.2494	37.013	55.7921	42.3162	67.2479	67.8823	68.0115	68.9806
25662	Vgll4	NM_177683	1293	13.5041	0.00366416	0.0120968	4.95482	0.899974	35.2858	13.4118	2.97351	20.1954	0.724366	5.83563	0	0	2.39763	0	0.302291	36.587	48.3149	34.614	21.6271	6.90549	16.5593	14.7871	15.3954
17526	Pawr	NM_054056	1828	13.4914	0.00368585	0.012151	0.787302	12.1379	2.83835	27.703	1.72084	0.0892802	0	2.91368	0	0	0.484548	35.9292	0	0	6.55014	3.10354	1.69973	30.4909	25.7426	27.9747	26.6038
3155	Bptf	NM_176850	11488	13.457	0.00374574	0.0123162	71.0331	73.0914	113.87	180.711	84.3382	87.4126	48.2244	35.5066	109.848	60.8696	126.371	36.8666	56.0367	99.2697	169.007	90.7575	96.4477	193.035	173.639	183.353	172.818
4889	Cnbp	NM_013493	2178	13.4562	0.00374702	0.0123175	285.773	414.038	469.125	611.485	231.812	215.208	308.547	354.592	352.654	251.825	356.253	394.86	491	355.023	554.535	503.018	463.925	767.98	536.905	580.988	560.067
1087	Abl1	NM_001112703	7008	13.4326	0.00378868	0.0124249	26.7599	17.0817	49.3356	32.3593	32.7179	35.5845	30.9395	23.6873	24.2554	13.3751	23.1297	7.14452	20.9709	46.8418	54.1542	53.3399	43.0064	26.6786	36.1929	34.4932	32.0725
23706	Tenm1	NM_011855	8363	13.4287	0.00379561	0.0124388	47.1954	23.4225	30.5022	29.62	74.226	62.4286	28.5585	48.4558	26.0313	43.4721	34.8984	20.1795	15.1896	25.3834	46.0647	28.4919	22.0688	22.4531	33.6487	30.3197	32.0584
17885	Pelp1	NM_029231	3439	13.4061	0.00383577	0.0125467	46.7077	24.9286	42.0344	22.3436	54.7812	91.8765	31.7286	42.333	29.534	29.9928	29.2332	25.4356	20.1171	44.3405	43.9	27.4948	52.4024	17.781	25.1092	24.3567	22.1278
2499	Atf5	NR_033136	1816	13.388	0.00386851	0.0126448	27.6839	24.8796	42.2417	10.4183	38.5899	30.3761	42.2917	21.2638	18.5727	15.0094	23.1681	29.5171	21.9537	43.3727	80.1244	21.1741	24.2956	4.61875	13.0859	12.8681	11.1004
6026	Ddx58	NM_172689	4943	13.3857	0.00387253	0.0126549	0.230568	0.25476	1.96906	2.73105	0.636396	0	0.189481	0.359176	0	0.198355	0.447984	0	0.316296	2.47764	0.473937	1.53032	3.39436	1.5874	2.90361	2.76289	3.67032
10463	Hdac7	NM_019572	4127	13.3849	0.00387398	0.0126567	31.6108	29.4032	69.2145	25.9978	35.6129	59.595	30.0703	25.704	22.2423	16.4401	48.827	6.70829	32.6745	75.6428	79.2811	50.8629	71.071	24.2575	25.4272	27.5029	26.8036
14762	Myd88	NM_010851	1905	13.3774	0.00388769	0.0126955	3.16943	0	3.84163	2.63209	3.30258	5.997	0	2.56292	2.21313	4.94094	0	0	0	3.1514	0	10.2579	1.95723	2.2725	2.71723	2.62863	2.90998
5329	Csde1	NM_144901	4200	13.3641	0.00391188	0.012759	409.915	269.402	361.914	581.515	422.59	475.663	375.869	377.062	412.248	396.062	340.804	153.222	314.179	371.583	411.951	319.234	344.888	591.13	569.62	580.24	585.069
26977	Zfp771	NM_177362	1230	13.3647	0.00391073	0.012759	21.3422	6.29025	18.0887	3.62739	34.3839	13.4013	18.2752	46.5503	7.79012	7.65243	5.04087	1.43669	12.3932	20.4995	5.50221	26.6495	19.7035	4.61948	2.86936	3.94781	3.0729
20792	Samd4b	NM_175021	4389	13.3628	0.00391429	0.0127613	65.5768	47.4585	116.898	51.2976	79.5564	88.9833	83.012	46.5189	57.5478	37.8426	78.7067	13.0854	50.5832	162.772	137.235	75.9769	91.6059	34.2142	59.9879	56.5625	54.4259
7302	Esf1	NM_001081090	3392	13.3548	0.00392888	0.0127938	53.4638	64.2145	53.3116	126.428	58.477	49.9909	61.0229	49.4622	51.1296	50.6999	77.2945	50.0132	65.3358	47.2911	100.834	31.7784	33.3427	165.277	118.129	112.511	109.795
17719	Pdcd4	NM_001168491	2330	13.347	0.00394319	0.0128276	86.5064	85.363	182.868	170.871	90.9059	71.4456	78.1844	96.5805	109.965	71.9571	87.815	111.742	56.5324	179.227	233.15	158.538	160.556	221.681	161.369	160.601	139.832
13422	Med15	NM_033609	3383	13.3327	0.00396969	0.0128903	99.8426	81.5708	122.513	53.023	128.837	163.108	119.464	93.1524	31.8356	62.6595	76.0601	61.2029	107.45	149.988	169.812	75.6512	94.5998	41.8291	58.9088	57.0553	54.2985
26171	Wdr11	NM_172255	4549	13.3273	0.00397972	0.0129168	26.5821	66.572	30.3154	42.3118	30.3883	27.697	25.7366	19.3191	19.9262	36.4254	43.5185	135.834	20.3637	16.6813	47.1498	32.8416	24.589	46.6909	38.3784	40.3627	43.815
20564	Rps3	NM_012052	1878	13.3245	0.00398486	0.0129305	465.637	398.125	435.264	307.197	427.318	344.832	518.175	457.795	508.583	537.117	576.824	275.389	342.161	456.49	563.56	372.244	348.763	214.525	345.539	329.667	339.057
23578	Tcf20	NM_001114140	7351	13.3118	0.0040087	0.0129896	126.219	93.1928	146.502	239.752	199.724	136.229	97.5976	103.068	117.938	102.755	121.579	40.0656	117.934	191.332	143.268	125.198	126.211	208.292	251.771	252.005	246.939
23346	Taf4a	NM_001081092	4422	13.3058	0.00401993	0.0130107	15.3953	19.2038	41.2532	34.3258	18.2982	23.0302	15.5677	17.3646	10.6609	7.44996	24.7378	17.317	15.5567	61.0932	32.6107	43.906	27.4032	32.7963	34.213	34.1098	36.1841
15066	Ndufa13	NM_023312	1249	13.2972	0.00403599	0.0130561	160.751	151.241	176.965	93.9355	109.558	191.036	172.848	200.781	122.132	168.148	114.531	126.392	212.799	185.534	190.273	189.261	142.792	68.2381	94.3787	99.7452	113.38
12027	Klf5	NM_009769	1725	13.2757	0.00407679	0.0131579	2.06346	2.96841	20.7692	2.72123	1.51966	0.473056	1.62888	2.31575	6.44345	0	5.39154	0.341475	3.17222	67.656	8.14842	4.75057	2.5217	4.07815	3.00077	2.19919	1.60682
23980	Tle3	NM_001083927	5202	13.2737	0.00408051	0.0131668	28.6993	14.2273	73.5688	37.8455	71.9269	29.6792	27.3672	21.4161	10.5728	11.2334	31.33	1.35881	9.99321	102.573	70.0029	56.9533	64.7461	31.7277	40.9333	39.1465	39.5744
15561	Nono	NM_023144	2468	13.2432	0.00413905	0.0133213	120.064	209.212	154.865	235.867	100.197	123.66	113.47	93.8778	138.215	150.963	160.067	232.229	235.341	111.895	215.156	147.63	144.78	222.113	244.44	243.11	233.805
12639	Lmo2	NM_001142336	1604	13.2404	0.00414457	0.0133331	10.2596	10.8936	38.794	36.0915	18.0863	8.6486	8.46682	6.91788	5.25687	14.1813	15.462	8.4464	8.77247	53.4469	8.60083	37.7275	55.4009	39.4721	36.9654	34.6249	33.3038
3468	Calcoco1	NM_026192	2824	13.2343	0.00415638	0.013368	12.8078	14.7397	61.1263	38.424	9.15888	9.82462	34.3267	12.2593	1.76436	9.51304	30.5811	1.04293	12.5951	32.143	122.037	38.3933	51.9317	41.7735	42.575	34.0134	35.334
27109	Zhx1	NM_001042438	5212	13.2321	0.0041607	0.0133788	80.9371	59.9495	51.262	101.623	61.0592	63.4718	70.5329	85.2447	117.99	87.3241	59.2258	67.5277	53.0949	42.1115	60.929	55.1508	46.8569	97.1808	105.004	102.686	101.623
1255	Actr5	NM_175419	2377	13.2182	0.00418777	0.013446	4.34647	15.3452	21.7214	10.055	5.22005	2.60907	3.74327	2.24073	4.67604	7.58966	2.60844	21.0639	22.3632	20.104	25.515	15.6464	25.6202	10.2445	9.60155	11.3632	9.01057
10354	H2afy2	NM_207000	1910	13.2182	0.0041877	0.013446	367.416	485.206	441.068	321.591	318.505	335.978	399.651	398.537	291.569	460.255	587.333	305.933	562.35	455.883	433.101	465.347	409.942	316.751	348.866	318.901	301.846
5231	Creb3	NM_013497	1582	13.2125	0.00419886	0.0134733	64.1011	110.772	66.0756	52.0743	72.3569	65.6118	42.9228	52.7459	69.532	81.4371	89.5831	116.729	126.005	90.317	69.2699	43.8306	60.885	46.3491	51.3111	52.6595	57.9772
10397	Has3	NM_008217	5912	13.19	0.00424313	0.0135893	21.9734	15.7388	8.61979	11.5418	17.5293	46.267	7.52516	12.4627	25.8995	22.1567	19.3272	8.31956	19.5696	3.4932	6.47219	16.4202	8.09359	10.9381	12.2579	11.1652	11.8061
11663	Jpx	NR_015508	3784	13.1897	0.00424383	0.0135893	0.877417	1.37725	10.8471	7.86399	1.93974	1.63894	0	0.469187	1.16481	0.0518218	0	0	4.13174	12.3749	8.94254	16.1589	5.91203	7.79389	6.15578	8.98272	8.52357
25340	Ubtf	NM_011551	4692	13.1847	0.00425375	0.0136179	34.3024	30.8999	77.1487	48.0655	33.8945	22.8528	46.3113	31.2172	50.8091	20.7294	46.7229	16.3205	29.6562	69.5537	72.0642	81.684	85.2929	38.694	50.2468	54.2358	49.0852
26838	Zfp516	NM_183033	7724	13.1501	0.00432291	0.0138138	9.4595	3.34373	12.1282	19.0885	9.91008	8.74761	15.5212	9.88379	4.34185	8.35251	3.44026	5.37645	1.21449	5.87595	8.12163	17.0567	17.4583	15.378	20.2876	19.8422	20.8459
24528	Tob1	NM_009427	2285	13.1477	0.00432785	0.0138264	80.5466	29.1947	110.721	64.8565	43.3653	126.421	57.385	88.3818	31.5341	136.193	39.3453	27.7122	20.5267	102.465	188.53	86.3475	65.5414	57.311	66.6219	68.6666	66.8265
7290	Ern2	NM_012016	2973	13.1417	0.00434003	0.0138589	13.2548	3.0788	3.74777	2.79052	13.7552	11.0889	10.3962	10.4506	31.1338	2.70428	7.00141	0	2.235	2.90781	4.46523	6.57292	1.04511	2.0022	3.16566	2.85828	3.13595
23082	Sub1	NM_011294	3321	13.1261	0.0043716	0.0139436	233.475	216.81	200.178	383.339	238.383	178.783	269.334	278.259	183.905	252.188	212.97	249.737	187.722	175.71	159.658	209.742	255.603	416.161	347.015	378.971	391.207
26639	Zfhx3	NM_007496	16439	13.1163	0.00439181	0.0139952	376.075	205.467	264.315	271.652	479.549	469.131	328.715	289.736	332.273	357.046	342.011	70.4102	203.979	285.83	257.162	248.863	265.405	279.902	278.426	259.946	268.333
12572	Lin28b	NM_001031772	5402	13.1134	0.00439761	0.0140104	14.1504	17.9485	23.5513	46.8018	13.2964	15.8914	22.1928	7.14829	10.075	16.2988	33.2035	8.34171	12.3004	14.6251	9.7816	30.4563	39.342	48.985	44.5139	47.6693	46.0389
21401	Shc1	NM_001113331	3552	13.1038	0.00441746	0.0140639	1.16513	0.340194	6.04592	5.75237	2.75525	0.229736	1.18658	0.624791	0.59347	1.60099	0	0.580421	0.44016	0.270424	6.37551	3.01695	14.5208	4.49426	5.29927	5.76729	7.44867
26468	Ywhaq	NM_011739	2110	13.1004	0.00442438	0.0140727	157.197	196.137	108.029	206.077	118.44	127.856	185.989	170.809	154.399	185.685	171.903	235.339	181.167	76.0244	92.6459	135.334	128.113	306.603	193.471	176.987	147.246
6629	Dusp15	NM_001159376	3114	13.0811	0.00446448	0.0141843	20.8487	20.0495	10.4727	7.61177	26.882	20.6495	22.5579	13.2557	8.24642	33.5009	10.951	39.1562	10.0414	8.40556	7.43944	7.28745	18.7583	5.64773	7.85803	8.04038	8.90096
8567	Gcfc2	NM_177884	3375	13.0793	0.00446816	0.0141895	7.4366	27.0759	15.1777	16.5007	5.02277	10.5901	6.24404	11.31	2.21447	9.23819	12.4662	24.5217	44.2398	15.0842	17.4302	14.7552	13.4411	15.1519	16.9407	16.1411	17.7691
4230	Cdk5r1	NM_009871	4134	13.0391	0.00455279	0.0144285	231.656	136.145	241.215	193.617	211.667	194.511	277.198	281.406	175.412	249.742	140.341	107.08	161.016	238.22	178.946	281.178	266.516	214.283	179.568	193.919	186.698
10877	Hras	NM_001130444	2272	13.0124	0.00460995	0.0145867	69.1066	56.3304	51.7092	25.9245	81.8424	67.3074	43.9034	59.3886	54.657	107.541	26.1204	109.668	33.2026	95.1246	39.7548	40.2301	31.7274	13.9334	30.5501	27.7173	31.4972
11930	Khsrp	NM_010613	3999	13.0014	0.00463353	0.0146374	68.4812	47.0538	107.368	45.0686	103.485	89.3358	74.5959	70.923	41.1164	31.4319	80.2915	16.2028	44.6672	175.044	76.0907	83.7018	94.6348	40.5279	47.7165	43.827	48.2028
8578	Gcn1l1	NM_172719	8546	12.9877	0.00466327	0.0147196	28.2525	14.2916	45.3978	20.2247	48.4244	36.0363	35.6186	16.0484	12.7818	20.6052	20.7291	4.44575	17.6999	52.1805	74.6838	28.8407	25.8864	11.9993	23.6224	22.5148	22.7623
10875	Hr	NM_021877	5481	12.984	0.00467134	0.0147367	0.374051	0	1.54427	0.741824	1.24351	0.208434	0.512647	0	0.279711	0	0	0	0	1.09532	0.0474907	3.22025	1.81403	0.59238	1.03027	0.60908	0.735568
19808	Rbfox2	NM_001110829	6565	12.9629	0.00471752	0.0148688	321.364	287.313	453.06	235.019	507.54	424.853	295.89	257.589	238.838	203.471	316.051	220.813	325.074	541.25	604.57	302.94	363.481	164.567	256.075	259.548	259.885
10455	Hdac11	NM_144919	2494	12.9574	0.00472972	0.0149039	49.4783	80.3185	52.311	30.2094	45.267	43.5822	22.9082	39.8647	39.4953	105.752	66.5913	103.213	71.1513	76.7398	64.8132	29.3193	38.3715	23.4335	33.9629	30.9085	32.5328
8374	Fzd4	NM_008055	3685	12.9178	0.00481786	0.0151231	1.58508	0	2.02488	2.67606	1.61245	0.620043	0.508334	1.92717	0	4.84247	0	0	0	3.8448	0	2.737	1.51771	1.76219	3.0648	2.80016	3.07707
14734	Mxi1	NM_001008542	5156	12.9116	0.00483164	0.0151561	13.1047	15.4548	49.2162	57.4768	14.2358	13.3893	22.525	18.6803	3.90261	5.89498	32.9838	0.114245	13.2663	20.9118	50.6862	62.474	62.7928	48.331	59.3239	60.4798	61.7727
21465	Sin3a	NM_011378	5210	12.9071	0.00484179	0.0151845	36.9055	38.6913	70.6355	90.0716	28.4784	27.8168	26.7858	29.3913	42.116	66.845	29.0718	47.3158	39.6864	80.061	62.1015	66.7872	73.5923	89.4801	89.8247	90.2017	90.7798
17557	Pcbp1	NM_011865	1669	12.8718	0.00492223	0.0154088	284.92	187.743	393.814	250.027	284.916	326.017	336.987	385.877	192.67	183.052	222.102	169.231	171.895	450.49	425.614	387.51	311.641	202.157	261.086	262.392	274.473
4237	Cdk8	NM_153599	2586	12.8695	0.00492753	0.0154219	52.1432	46.6858	52.4751	123.536	33.9251	39.3179	39.659	47.7149	82.4795	69.7626	44.8699	57.4011	37.7864	30.1796	60.0917	64.8403	54.7887	136.226	113.185	123.519	121.214
6398	Dnajc2	NM_009584	2037	12.8585	0.00495283	0.0154941	118.106	73.0649	70.2724	162.001	82.1044	81.0012	95.1779	153.834	160.685	135.831	130.667	35.5682	52.9592	50.5737	70.7925	76.7454	82.978	191.537	149.235	157.927	149.307
18663	Pou6f2	NM_175006	2113	12.8551	0.0049607	0.0155122	33.7829	12.2444	10.3223	17.9046	37.7147	23.4804	33.6877	26.6773	18.7737	62.3639	13.8333	1.81202	21.0877	5.45507	15.7681	4.77323	15.2929	15.8782	17.1483	20.108	18.4839
23873	Thoc1	NM_153552	3855	12.8513	0.00496952	0.0155323	54.1008	94.3573	47.1742	114.405	23.6642	23.9197	49.8065	79.3291	95.6445	52.2408	120.283	93.4373	69.3514	27.6578	38.7575	51.9989	70.2825	148.796	105.773	104.351	98.6995
26796	Zfp420	NM_172740	3333	12.847	0.00497935	0.015556	12.5469	33.8462	14.9293	33.423	19.0334	4.11316	14.8935	13.5832	12.3618	11.2961	20.5958	68.3949	12.5479	11.0954	19.5242	13.9955	15.102	36.3682	35.2261	32.6889	29.4088
23728	Tet3	NM_183138	10904	12.8437	0.00498716	0.0155769	72.8559	56.5096	138.136	83.8974	98.151	102.167	58.0225	44.8573	45.0621	88.8752	73.4743	43.4329	52.6216	156.736	214.033	94.6356	87.1378	70.4463	90.5633	88.8002	85.7797
4556	Chl1	NM_007697	7751	12.8349	0.00500752	0.0156193	392.513	357.511	301.528	593.16	364.381	326.114	410.905	429.134	400.581	423.963	455.961	217.69	398.88	315.793	173.184	366.459	350.676	554.683	592.241	596.893	628.823
2331	Arnt	NM_001037737	4369	12.7885	0.0051171	0.0159074	15.1709	18.4903	54.8921	46.5072	27.0002	32.4242	5.25219	10.8702	13.7729	1.70555	34.8706	5.1233	15.477	41.1129	63.0932	60.8866	54.4756	42.7313	45.7219	47.8606	49.715
6738	E2f4	NM_148952	1993	12.7425	0.00522777	0.0162295	53.3276	30.8929	115.317	36.1955	114.432	45.1207	37.8308	49.2178	56.5391	16.8249	35.5546	43.0035	14.1205	175.675	204.136	49.3411	32.1155	29.3241	41.9102	38.526	35.0215
13041	Mafb	NM_010658	3389	12.726	0.0052683	0.0163334	44.199	113.403	35.6258	67.8168	43.4712	31.6873	38.2767	57.1021	47.4993	47.1574	214.97	9.90722	115.333	55.8359	32.7963	36.0846	17.7863	80.0771	65.6084	65.2826	60.2992
24659	Traf7	NM_153792	2735	12.6989	0.00533515	0.0165148	59.9374	60.2197	88.8678	35.3643	108.243	62.7754	79.2776	47.712	32.7219	28.8942	74.6494	69.9962	36.0136	110.366	88.6056	92.6532	63.846	25.5236	37.8525	37.7279	40.3533
1589	AI987944	NM_183167	1806	12.6396	0.00548447	0.0169127	2.24519	0.362126	0.594385	6.23336	1.93534	1.35552	1.29652	0	5.51779	3.36595	0.49045	0.16308	0.432849	0	0.288258	1.74519	0.344086	8.53957	4.8204	5.7135	5.85995
17562	Pcbp3	NM_021568	2175	12.6101	0.00556026	0.0171083	75.2341	30.389	45.1186	38.0244	83.4033	97.6974	107.871	57.9558	27.8424	76.6343	43.3714	8.26017	39.5355	70.5506	29.7995	28.9823	51.1421	33.2147	42.6222	39.7674	36.4934
2986	Bcl6b	NM_007528	3425	12.6026	0.00557968	0.0171528	0.703643	0	5.38939	2.15725	1.0205	0.667112	0	0.129592	0	2.40465	0	0	0	0.140226	0	0.552144	20.8652	1.34297	2.19831	3.10133	1.9864
4349	Celsr2	NM_017392	10543	12.5987	0.00558981	0.0171763	77.5798	63.4103	153.07	105.345	98.9259	97.0587	53.2132	65.0432	87.7208	63.517	51.6682	28.1588	110.404	197.749	174.576	133.092	106.861	86.8451	110.156	112.048	112.33
6739	E2f5	NM_007892	1749	12.5925	0.00560601	0.0172192	19.416	29.7338	26.4706	78.3839	10.6915	10.1711	12.5845	18.018	14.3536	50.6771	35.4504	24.9224	28.8286	7.27687	24.1098	41.808	32.6876	92.2009	70.223	73.7463	77.3654
4162	Cdc73	NM_145991	2678	12.5915	0.00560877	0.0172193	26.8559	22.983	57.3989	80.7347	34.5868	38.3329	20.8096	26.3526	4.22202	36.8316	40.6825	13.0874	15.1791	57.2096	83.2016	54.6096	34.5749	80.2211	79.9521	78.3651	84.4004
6496	Dot1l	NM_199322	5694	12.5796	0.00563986	0.0172841	24.9091	27.7541	56.3889	23.6455	35.5416	33.965	25.3314	18.1625	12.5537	23.9004	10.9669	32.0695	40.2257	79.6661	65.5542	46.9397	33.3956	16.2038	26.4461	25.5571	26.3749
3247	Btg2	NM_007570	3083	12.5665	0.00567432	0.0173743	3.37388	5.01798	26.0443	14.6658	0.113371	1.48223	5.77214	9.21391	1.18103	2.48059	3.87858	10.795	0.380339	14.7213	13.762	35.9858	39.708	10.7947	15.5688	17.6698	14.6299
19752	Rasd1	NM_009026	1607	12.5389	0.00574771	0.0175524	2.66913	0	0.194739	0.963586	0	0.101558	3.78839	0	8.5861	3.53871	0	0	0	0	0	0.392262	0.386695	1.01022	1.0249	0.0944268	1.7248
5519	Cux2	NM_007804	5113	12.5245	0.00578638	0.0176433	33.8751	53.9739	77.5648	34.7506	65.1809	47.8792	19.6004	29.6017	31.7458	9.24282	32.2218	43.3172	86.3826	71.9988	83.1341	80.2596	74.8669	25.0302	36.676	38.3144	38.9819
26805	Zfp444	NM_001146024	4331	12.5101	0.00582516	0.0177313	25.2078	11.549	31.381	14.1806	27.116	21.5546	20.5443	29.8224	19.2478	32.9615	19.6334	2.1081	12.9054	32.7132	30.8317	29.9827	31.9964	9.93317	15.5373	15.1358	16.1159
15208	Nfatc3	NM_010901	6014	12.4871	0.00588787	0.017878	13.182	22.8305	37.117	37.1853	13.774	15.5226	15.1065	14.9082	8.89037	10.8905	29.8246	2.79145	35.8756	30.3066	36.7462	35.8471	45.568	38.0615	38.8103	35.6273	36.2423
13341	Mcf2l	NM_178076	5252	12.4578	0.00596877	0.0180839	81.9912	46.2976	83.693	53.138	144.581	69.5451	94.6057	75.2992	62.0667	45.8498	53.6309	50.3582	34.9037	108.958	65.2229	77.1752	83.416	38.2259	59.4043	56.485	58.4366
11490	Irf2bp1	NM_178757	2699	12.4131	0.00609403	0.0184151	26.0885	14.5108	45.6517	16.75	23.6986	25.0944	19.2596	39.4681	10.7214	38.2888	15.2603	6.98386	21.2882	56.5865	28.161	32.9312	64.9279	14.6362	17.871	16.7542	17.7384
26760	Zfp358	NM_080461	1999	12.3989	0.00613445	0.0185251	74.0387	54.0573	66.4886	31.3634	89.4351	78.8671	107.295	84.596	18.1188	65.9204	27.6936	63.5013	70.977	66.7914	74.7425	70.9515	53.4688	24.7695	30.7204	35.6777	34.2861
20586	Rptor	NM_028898	6932	12.3796	0.00618962	0.0186836	27.562	15.8336	39.2674	20.8355	35.5472	31.9957	20.4021	18.1843	26.4565	32.786	10.1583	12.3638	24.9786	46.1082	46.9	35.4648	28.5968	16.0421	22.4358	21.9998	22.8641
22164	Smo	NM_176996	3977	12.3715	0.00621299	0.0187337	2.80897	5.45631	31.3285	23.6313	0.527316	0.779703	1.17753	1.45086	0	12.9184	1.55903	14.5151	0.294842	17.8125	76.1844	15.6917	15.6253	21.2265	24.9072	23.6182	24.7733
18654	Pou3f2	NM_008899	1338	12.3676	0.00622443	0.0187641	32.232	4.84874	29.5574	9.18976	57.3395	39.7643	29.0502	14.2643	47.5512	5.42262	6.95098	0	7.59523	25.4854	67.895	16.4894	8.3599	3.84217	10.1993	11.7947	10.9228
7133	Eno1b	NM_001025388	1649	12.3567	0.00625611	0.0188473	92.1289	99.0004	97.0575	38.9181	185.253	149.546	58.2183	51.6795	67.2879	40.7884	78.6919	115.201	103.108	111.841	172.531	42.432	61.426	44.3019	38.953	38.189	34.2287
4316	Cebpg	NM_009884	4702	12.3349	0.00631977	0.019006	20.5627	21.7171	38.1575	60.2484	21.1111	18.7779	33.066	19.4456	25.5543	5.42156	11.962	24.1781	29.0113	24.412	40.0797	54.9658	33.1723	60.0179	59.5975	60.7686	60.6098
3687	Cc2d1b	NM_177045	3286	12.3093	0.00639522	0.0191825	27.1743	9.59072	30.8546	19.6674	18.1356	39.0379	26.5077	17.8297	35.5164	26.0185	14.0168	7.6185	7.13686	21.0467	34.6957	38.1748	29.5014	15.3976	19.6192	22.2582	21.3944
7132	Eno1	NM_023119	1776	12.2897	0.00645402	0.0193283	85.9437	91.9943	91.3429	36.41	172.892	139.495	54.5826	48.2338	62.4762	37.9821	73.0647	106.963	95.9549	104.519	163.711	40.1076	57.0334	41.2862	36.4325	35.7145	32.2066
15622	Npm1	NM_008722	1259	12.2894	0.00645487	0.0193283	497.743	750.378	319.699	764.389	189.336	225.945	473.882	309.18	1008.42	779.702	739.769	779.935	731.431	219.728	401.093	349.98	307.995	977.833	700.817	701.228	677.679
10028	Gps2	NM_019726	1220	12.2671	0.0065221	0.0195001	34.4901	70.6457	127.254	54.3807	57.0123	25.8184	28.4052	38.5641	3.45575	53.6846	70.7877	56.249	84.9004	99.2041	232.774	56.3194	120.718	43.6903	59.7862	54.9761	59.0702
26484	Zbed6	NM_001166552	5007	12.2634	0.00653322	0.0195249	56.3811	59.7123	100.058	115.052	55.6709	90.1909	46.3907	70.9169	37.0108	38.1065	74.2993	41.5284	63.3092	103.162	100.854	104.746	91.4692	101.754	113.109	122.953	122.391
2426	Asf1a	NM_025541	2182	12.2611	0.00654011	0.0195413	36.0874	44.3808	68.9946	122.3	30.7554	28.2728	48.5043	19.121	73.3349	16.5359	26.1829	71.1335	35.8261	44.7918	46.2856	85.2234	99.6778	145.453	107.831	116.972	118.945
10588	Hipk2	NM_010433	4259	12.2272	0.00664408	0.0198135	165.821	133.431	303.839	252.292	229.377	211.219	111.825	142.149	169.229	131.128	189.983	76.1374	134.172	342.191	435.274	217.423	220.466	242.871	268.324	249.724	248.251
6646	Dusp5	NM_001085390	1155	12.2052	0.00671222	0.0199565	1.75874	0.367801	8.01322	0.437048	2.57224	1.41302	0	1.92143	4.64574	0	0	0.764993	0.338409	15.1775	1.80292	0.54577	14.5267	0.234259	0.814849	0.26276	0.436325
1525	Ago2	NM_153178	8031	12.2028	0.0067198	0.0199692	50.0733	23.0987	63.6133	57.6512	63.4329	77.3244	59.5364	39.1292	39.9452	21.0719	25.4223	12.7256	31.1483	87.192	60.2854	62.7931	44.1826	46.0888	64.2785	57.988	62.2493
26514	Zbtb38	NM_175537	4091	12.188	0.00676612	0.0200995	87.9179	67.8643	44.3845	72.0906	91.9729	130.292	77.3827	64.2288	76.7766	86.8545	137.81	31.1009	34.6817	53.2398	36.649	53.7759	33.8735	64.0875	75.9178	74.8148	73.5423
21278	Sfmbt1	NM_001166531	7743	12.1719	0.00681686	0.0202266	16.8061	13.6085	38.6803	22.947	32.772	19.6022	9.61644	14.2161	9.20689	15.4231	23.4508	7.53138	9.84349	42.3953	47.6017	25.3188	39.4055	21.4904	23.6412	23.909	22.7473
21237	Sertad2	NM_021372	5730	12.1577	0.00686192	0.0203448	19.2204	6.46981	36.5902	24.8153	21.624	13.6716	13.7303	22.6186	40.7688	2.90889	10.6661	6.21941	2.52389	26.1091	65.96	27.6128	26.6787	20.1629	25.9925	26.7207	26.3851
17427	Pak1	NM_011035	3061	12.1565	0.00686599	0.0203525	527.829	425.089	422.174	365.119	738.097	692.485	406.801	562.028	345.585	421.976	385.871	313.381	576.014	402.294	534.965	349.676	401.761	338.19	365.191	374.725	382.371
26826	Zfp473	NM_178734	3805	12.1444	0.00690459	0.0204538	0.866443	0	1.75713	0.580776	0.597082	1.32965	2.95381	0.116649	0.201458	0	0	0	0	1.51466	0.273636	0.994004	4.24623	0.284436	0.432855	0.877363	0.728451
23785	Tfe3	NM_172472	3274	12.1359	0.00693184	0.0205126	24.3643	48.8473	22.9895	27.8435	19.5899	21.8337	33.8997	21.4198	14.165	35.2777	37.6053	50.9162	58.0205	26.0381	16.4574	21.3715	28.0911	18.3465	33.7049	29.153	30.1696
20417	Rorb	NM_001043354	3330	12.1248	0.00696757	0.0206051	3.82909	16.4804	9.76541	29.9227	5.66793	6.37134	6.60968	2.93235	0.863229	0.529983	24.2053	0	25.2358	6.85075	4.37736	15.1439	12.6896	32.5821	29.4639	28.8906	28.7542
19734	Rara	NM_001177302	3382	12.119	0.00698657	0.0206524	51.6176	55.5645	77.1357	25.3781	79.8363	63.0715	61.6188	62.7324	17.2825	25.164	66.3922	9.23104	91.0702	62.8389	72.7322	108.478	64.4939	21.1207	27.4108	26.3824	26.5985
20416	Rora	NM_013646	1644	12.0987	0.00705261	0.0208166	20.3575	2.6041	56.4695	23.7126	62.2933	24.024	11.6791	14.5791	9.09226	0.477113	7.8123	0	0	36.9554	105.449	22.2391	61.2348	23.8641	22.4697	22.6139	25.9028
26800	Zfp426	NM_146221	3557	12.0868	0.00709176	0.0209232	43.467	30.7789	54.9699	91.5723	52.0796	33.586	50.8195	40.18	28.0155	56.1213	36.73	36.2667	19.3398	46.7177	56.7867	75.4949	40.8806	95.616	96.6419	86.4731	87.5583
8223	Foxk1	NM_199068	7446	12.0661	0.00716	0.0211065	72.9532	65.7687	64.9201	43.1731	83.2499	71.0155	61.4466	49.595	94.2485	78.1636	40.5643	97.8973	58.8446	96.5256	72.1182	40.1279	50.9087	39.2446	45.6608	43.4893	44.2975
18795	Ppp2ca	NM_019411	1930	12.0453	0.00722973	0.0212758	481.427	513.15	427.705	376.234	486.977	479.212	598.36	550.33	372.352	401.332	401.343	563.56	574.547	525.564	295.497	463.138	426.622	448.192	362.684	351.606	342.455
8376	Fzd5	NM_022721	6914	12.0395	0.00724909	0.0213192	0.210426	0	0.494439	1.29038	0.530805	0.731752	0	0	0	0	0	0	0	0.0694639	0.376478	0.273516	1.2583	1.09574	1.32719	1.42658	1.31201
14747	Mybl2	NM_008652	3702	12.0164	0.0073273	0.0215081	0.524558	0	2.90595	1.56264	0	2.86555	0.1265	0	0.155297	0	0	0	0	1.42707	1.125	0.51083	8.56089	1.09631	1.52536	2.13146	1.49744
15121	Nedd4	NM_010890	5494	12.009	0.00735232	0.0215724	673.946	592.355	802.018	1228.25	746.696	781.8	622.67	710.776	501.94	679.796	687.934	425.219	663.911	711.363	905.827	829.547	761.335	1173.29	1272.71	1209.48	1257.5
3026	Bend6	NM_177235	2292	12.0006	0.00738118	0.0216433	54.0703	31.3949	46.6803	27.7071	51.9252	57.6057	45.1548	71.4577	48.9126	49.3656	28.0179	36.4941	29.6728	52.805	33.9567	32.1783	67.7814	20.5406	29.5649	28.0713	32.6516
964	Aamdc	NM_001177945	893	11.9998	0.00738371	0.0216462	13.0817	112.015	26.168	35.8801	21.9186	15.3518	23.0743	4.97034	0	13.1754	0	305.406	30.6387	38.992	12.2424	38.8242	14.6135	26.0571	40.5759	37.3837	39.5038
5293	Crtc2	NM_028881	2629	11.9865	0.00742938	0.0217432	19.5685	34.5132	38.2794	14.926	22.4684	22.2862	35.6259	12.3245	12.1003	12.6055	55.2543	24.6462	23.6391	49.6898	45.8415	27.0944	30.4919	10.9092	16.3779	16.2191	16.1979
6262	Dlg1	NM_007862	4661	11.9868	0.00742835	0.0217432	6.18417	14.6326	16.6772	39.7003	3.11203	2.45104	14.1666	6.0945	5.18049	6.10032	20.3337	0	23.5641	10.7163	18.094	21.233	16.6654	34.5396	40.7879	42.2252	41.2485
24856	Trnp1	NM_001081156	1654	11.9874	0.00742641	0.0217432	17.7995	6.75453	3.30233	4.10235	39.5168	46.9681	6.22894	6.17206	1.39035	6.52065	4.28418	6.05427	9.92516	5.51705	2.04586	0.76223	4.88419	3.43528	6.25916	3.21103	3.50393
11225	Ikzf2	NM_011770	9421	11.9856	0.00743259	0.021748	3.10742	2.17066	8.1595	10.0439	3.20918	3.88045	3.18134	4.28728	1.50527	2.581	2.63253	0.0625247	3.81693	5.68417	8.86904	10.1035	7.98129	9.13291	10.0648	9.66419	11.3137
26765	Zfp367	NM_175494	3490	11.9584	0.0075272	0.0219969	0.361615	1.06501	5.83505	4.70557	0.0500749	0.327344	0	1.39896	0	0.393311	2.41108	0	0.783964	0.275228	15.8863	3.97364	3.20503	3.79883	3.8428	5.04364	6.137
26435	Yes1	NM_009535	4537	11.9499	0.0075567	0.0220692	13.2769	9.29613	20.3683	43.4716	8.12754	8.27352	6.91564	8.80463	22.4287	25.1114	19.7181	1.62289	6.54739	13.6556	10.7859	23.0638	33.9678	46.2777	41.9545	43.1117	42.5425
26537	Zbtb8b	NM_153541	3288	11.9486	0.00756119	0.022073	6.93287	20.3575	4.96483	11.0523	5.52773	8.53745	3.5607	15.119	6.58606	2.26629	10.5062	41.2941	9.27228	2.84834	1.74164	10.5444	4.72491	10.2863	11.9504	10.707	11.2654
3941	Ccpg1	NM_001114328	2966	11.9443	0.0075764	0.0221081	46.1539	52.5539	59.9286	107.657	40.7148	42.5343	42.9462	47.5876	45.3571	57.7835	49.4242	44.9827	63.2548	49.6304	76.9657	42.9311	70.1873	104.269	111.694	106.773	107.893
8246	Foxr2	NM_001034894	3208	11.9226	0.00765299	0.022294	0.23936	0	0.311923	1.57065	0.0544767	0.966608	0	0.415073	0	0	0	0	0	0.299423	0.16228	0.78599	0	1.93987	1.54022	1.70286	1.09965
10499	Hells	NM_008234	3019	11.912	0.00769085	0.0223949	2.18501	6.26217	17.6802	16.0948	0.289436	1.51365	1.86142	1.61721	6.91899	0.909344	15.5498	0	3.23669	20.999	26.4694	13.9895	9.26263	15.7735	15.5092	16.7376	16.359
2991	Bcl9l	NM_030256	5328	11.8934	0.00775722	0.0225454	22.1998	19.0136	80.7686	17.7326	29.1597	51.6446	16.6121	24.7417	7.9489	3.09157	30.0072	0.110556	26.9231	182.446	53.6911	36.085	50.8519	10.3596	21.0204	19.0249	20.5252
20055	Rfx7	NM_001033536	8000	11.8893	0.00777213	0.0225793	128.907	89.3292	179.736	193.729	145.117	116.242	142.13	123.169	139.248	107.533	93.3916	92.0751	82.5208	164.134	121.884	215.742	217.186	203.502	195.377	186.74	189.298
26871	Zfp580	NM_026900	1101	11.8818	0.0077991	0.0226434	107.7	89.9151	69.0836	55.743	60.1585	92.6454	71.0323	118.118	158.914	145.334	69.5892	80.5188	119.637	70.0127	60.7595	75.575	69.9873	68.0725	54.067	48.6518	52.1807
11632	Jag1	NM_013822	5297	11.8804	0.00780446	0.0226495	3.09727	3.94631	11.0938	24.308	1.08875	1.04756	5.30454	0.251379	10.8173	0.0740395	2.59188	1.05643	8.19062	2.40273	7.81332	17.9696	16.1895	22.6283	25.1412	25.7251	23.7374
27132	Zkscan6	NM_026107	2302	11.8625	0.00786951	0.0228095	17.4336	47.5987	17.2313	15.5871	13.741	7.08967	11.1888	10.9902	40.1255	21.4664	50.9828	17.7839	74.0295	15.8561	24.3109	10.1318	18.6264	15.3973	15.6381	13.9088	17.4042
15159	Neo1	NM_008684	7386	11.8489	0.00791915	0.0229342	210.42	244.746	163.234	267.841	212.808	264.273	150.585	237.911	211.07	185.872	218.74	228.727	286.77	151.638	203.134	165.315	132.849	259.506	280.969	264.412	266.477
277	1810011O10Rik	NM_026931	1331	11.8474	0.00792448	0.0229401	3.97571	0	21.2242	8.37842	0	0.122618	1.05553	22.6761	0	0	0	0	0	36.9858	0	20.3649	27.546	7.52147	9.72262	7.18247	9.08711
15772	Nrip1	NM_173440	4529	11.8431	0.00794036	0.0229764	74.4009	51.2051	58.5608	45.461	92.1462	80.6472	51.5971	80.8517	47.814	93.349	53.8806	48.9028	50.8319	43.319	79.9454	37.0229	73.9557	40.0866	47.4835	46.3708	47.9031
15249	Nfxl1	NM_133921	3670	11.8364	0.00796527	0.0230341	16.0978	13.4399	20.6712	40.513	18.619	11.9624	16.9712	18.3829	12.271	18.3804	19.0666	6.98187	14.2713	16.6853	18.8662	28.1689	18.9643	41.507	39.7488	40.7682	40.0281
4656	Cirh1a	NM_011574	2249	11.833	0.00797785	0.023056	39.5374	82.7062	43.9193	39.5272	43.904	51.1601	39.7714	31.3794	39.7078	31.3017	47.4581	170.768	29.8925	25.8395	56.0176	49.6107	44.2095	32.0016	42.3706	42.1698	41.5668
7029	Elf2	NM_023502	2676	11.8282	0.00799564	0.0230978	50.3854	41.9818	85.8939	109.309	61.3885	49.4004	33.7752	71.819	61.0145	24.9147	51.8013	34.9993	39.1446	105.621	62.9342	93.047	81.9735	116.681	109.643	110.065	100.848
3070	Birc2	NM_007465	3140	11.8015	0.00809494	0.0233165	53.6253	27.7433	39.7039	89.2975	40.3509	26.4557	54.8839	50.1806	88.6168	61.2636	47.1085	18.1966	17.9249	25.9256	21.2216	73.2748	38.3934	98.6631	80.0277	90.708	87.791
5235	Creb3l4	NM_030080	1553	11.7852	0.00815636	0.0234593	0.0187552	1.3423	1.16353	3.01297	0.112531	0	0	0	0	0	0	0	4.02691	0.463883	4.19022	0	0	1.56801	2.8786	3.22444	4.38081
11668	Jun	NM_010591	3187	11.7854	0.00815567	0.0234593	64.4324	174.011	115.509	65.1325	9.43174	24.8877	74.7932	55.5685	59.1687	162.745	232.069	125.867	164.096	78.3628	61.5826	107.995	214.094	64.0979	72.1292	59.7072	64.5955
6723	E130308A19Rik	NM_001015681	3604	11.7714	0.00820858	0.023585	47.5349	22.7716	74.834	77.913	63.6686	36.8613	26.6376	37.0697	43.6554	77.3166	38.4629	5.88391	23.968	63.1659	115.631	61.7421	58.7969	70.0448	80.5618	80.0824	80.963
4526	Chd4	NM_145979	6425	11.7622	0.00824385	0.0236667	154.878	106.462	211.626	271.691	189.585	174.736	108.019	108.735	173.92	174.272	124.488	58.2627	136.634	206.35	316.731	156.291	167.13	237.638	278.536	288.963	281.627
20321	Rnf165	NM_001164504	7299	11.7611	0.00824807	0.0236739	101.415	70.4908	147.331	102.881	114.161	93.8888	82.702	90.3635	129.071	98.302	108.186	40.4721	62.8143	156.9	144.895	139.304	148.225	95.7873	106.732	103.782	105.224
19381	Ptprk	NM_008983	6177	11.7474	0.00830041	0.0237945	31.5365	58.6028	73.0702	65.6095	36.6951	18.9176	15.9967	31.5446	50.4144	35.6505	58.4336	77.004	40.3707	52.7936	62.4088	65.1081	111.97	65.9231	65.5925	64.8787	66.0438
19237	Psmc5	NM_008950	1277	11.744	0.00831345	0.0238269	389.156	416.35	414.377	273.534	468.311	406.924	338.483	360.781	322.947	437.487	266.35	499.097	483.604	509.421	485.942	298.152	363.995	177.131	272.322	311.806	332.879
26535	Zbtb7c	NM_145356	4572	11.7229	0.00839527	0.023987	16.8658	6.56387	29.5934	7.91141	13.302	29.7708	11.6768	15.9212	9.80819	20.7159	3.87469	0.257675	15.5593	57.4606	37.6326	12.2709	11.0094	6.03633	7.56502	9.06082	8.98347
23773	Tfb1m	NM_146074	1334	11.7105	0.0084435	0.0240803	20.7472	32.3408	7.46296	32.1983	14.6726	17.0055	17.2015	36.5994	16.8077	22.1965	22.2434	60.7149	14.064	12.4209	1.95125	7.56059	7.91914	32.6549	33.6881	31.8503	30.6
19827	Rbm14	NM_019869	2809	11.7063	0.00845998	0.0241122	53.9324	66.1037	74.9068	27.0524	73.6001	79.1328	38.5112	58.4639	52.8042	21.0823	42.4115	123.618	32.282	127.463	93.3139	53.4093	25.4408	26.3923	30.3219	25.9299	25.5656
26750	Zfp334	NM_178411	5033	11.7046	0.00846658	0.024121	28.7059	20.1689	36.5627	62.4227	33.2994	38.3934	35.0785	26.0155	20.9418	18.5067	19.7988	27.9717	12.7362	31.0131	27.4623	60.1182	27.6571	52.9527	66.8043	66.7516	63.1822
8596	Gdf1	NM_001163282	2723	11.676	0.00857968	0.0243931	25.4508	15.2883	32.056	11.5281	37.4168	23.6146	22.7014	34.2302	14.1458	20.596	13.3367	11.1406	21.3876	26.8093	47.8915	40.7433	12.7798	8.94281	12.2699	12.037	12.8626
1241	Actl6b	NM_031404	1548	11.6727	0.00859293	0.0244107	104.069	101.237	149.151	65.0271	163.02	130.943	80.7731	75.1221	87.4003	87.1527	73.2406	95.891	134.58	241.533	150.326	85.9217	118.824	47.0176	70.8294	69.5003	72.7611
25508	Usp15	NM_027604	3215	11.658	0.0086514	0.0245667	93.7529	56.7977	83.8244	148.527	83.6571	113.608	117.695	98.4342	68.429	80.6942	87.3356	17.7721	65.2855	76.2612	75.2958	89.996	93.7445	139.871	157.566	150.658	146.014
5064	Commd9	NM_029635	1175	11.6466	0.00869735	0.0246456	38.3411	51.7471	36.3824	16.3146	31.8289	34.4465	38.2613	61.5726	49.4179	14.5193	25.6303	80.7117	48.8994	30.6558	27.4696	47.2103	40.1939	13.3558	17.6215	14.9807	19.3004
4632	Chtop	NM_023215	3247	11.6408	0.00872052	0.0246972	141.266	218.54	206.076	271.375	139.346	131.538	154.178	177.158	158.409	86.9648	156.037	243.183	256.402	195.615	185.903	224.035	218.75	300.485	253.911	263.297	267.809
19698	Ramp3	NM_019511	1221	11.6344	0.0087464	0.0247603	16.4647	3.52128	9.53308	0.91644	9.87595	9.35651	1.53416	12.723	30.4485	34.8504	0	0	10.5638	24.584	0.213183	7.22776	6.10732	0.66479	0.770803	0.372835	1.85733
8220	Foxj1	NM_008240	2576	11.6326	0.00875397	0.0247716	6.93995	0.252887	14.0161	6.76729	24.3553	12.6711	0.908973	2.06763	1.63665	0	0	0	0.758661	10.8136	32.8402	7.58591	4.82469	4.20139	9.22517	7.18663	6.45596
11492	Irf2bpl	NM_145836	4112	11.5922	0.00891902	0.0251453	91.4656	77.8093	54.2839	47.0944	66.173	58.3836	65.8266	85.9206	149.693	122.797	162.848	25.9999	44.5803	70.9548	21.0795	72.5103	52.591	53.2322	43.8875	47.1985	44.0594
13070	Magel2	NM_013779	4660	11.5699	0.00901166	0.0253609	49.7241	38.0469	61.7228	26.5703	99.0439	50.2921	42.4085	51.5287	20.3974	34.6741	37.4449	42.9775	33.7182	88.4796	28.655	84.9504	44.8062	25.3732	25.6494	28.4927	26.7659
11693	Kat7	NM_001195003	5966	11.5374	0.00914801	0.0256715	23.5397	18.954	54.014	28.4846	35.9131	31.7326	26.6099	22.4678	10.1183	14.3964	35.1866	4.83795	16.8373	64.7234	60.6021	37.1921	53.5383	25.4424	29.4602	29.5552	29.4805
23811	Tgfbr1	NM_009370	5666	11.5238	0.00920568	0.0257915	96.1914	84.7689	89.6677	172.26	91.2361	100.238	83.2299	129.176	90.0687	83.1996	100.91	65.2357	88.1613	78.9154	137.774	89.3368	52.6441	185.473	162.16	168.723	172.685
2978	Bcl2l12	NM_029410	1074	11.5018	0.00930013	0.0260141	0.331038	1.37454	9.70699	5.94321	0.16272	1.82351	0	0	0	0	4.12362	0	0	14.5334	1.45417	19.3687	3.47162	5.54239	5.25782	5.93412	7.03849
10710	Hmgb2	NM_008252	2692	11.4995	0.00930996	0.0260222	2.16372	5.40027	14.4624	13.279	0.51935	0.606256	3.82714	4.78146	1.28138	1.96676	13.6548	1.09407	1.45194	2.58691	28.7177	16.1572	10.3878	16.5839	12.1489	12.6829	11.7003
26873	Zfp59	NM_011762	3796	11.4994	0.00931037	0.0260222	2.9877	1.51664	3.73743	11.3971	1.93361	1.84873	4.44123	4.79397	2.17081	2.73787	2.56672	0.232763	1.75044	0.822387	2.88	8.13695	3.11037	13.1151	11.7768	10.6732	10.0234
20862	Scai	NM_178778	10704	11.4881	0.009359	0.0261154	38.0152	41.0801	59.0498	92.4612	28.9146	26.8958	32.3314	49.303	50.3799	40.2666	65.7033	21.0216	36.5155	38.2729	27.0899	92.7526	78.0838	105.356	89.244	89.5805	85.664
6292	Dll4	NM_019454	3451	11.4781	0.00940277	0.0262164	0.146899	0.0377535	2.0342	2.9368	0.455767	0.425627	0	0	0	0	0	0	0.113261	0	0	2.3746	5.76222	2.82252	2.9999	2.85811	3.06667
26327	Wnt7a	NM_009527	3176	11.4703	0.00943636	0.0262783	1.60491	0	1.79674	7.6849	9.62948	0	0	0	0	0	0	0	0	1.28537	0.573702	3.17564	2.15227	7.32651	6.5193	7.21452	9.67925
5813	Dach1	NM_007826	5225	11.4623	0.00947141	0.0263653	90.8585	94.1812	61.8917	74.1554	99.8063	75.1833	108.27	101.173	89.6751	71.0441	119.683	45.7144	117.146	36.3078	84.5902	59.1155	67.5534	80.4718	66.4659	76.6706	73.0133
16055	Ogt	NM_139144	5382	11.4518	0.00951756	0.0264778	177.588	244.692	220.318	389.79	152.648	122.903	153.665	136.157	223.648	276.506	246.619	195.363	292.094	152.908	142.723	310.38	275.263	479.303	377.588	358.806	343.462
25490	Usf1	NM_009480	1821	11.4508	0.00952221	0.0264837	44.3981	86.4201	49.0979	30.7985	27.9273	39.8824	68.4067	52.4042	54.7233	23.0445	41.5881	39.949	177.723	26.2423	55.4613	74.0791	40.609	26.7449	29.3302	32.2487	34.8701
5369	Csrnp1	NM_153287	2890	11.4452	0.00954688	0.0265434	0.686287	0.395262	9.36741	1.04856	0.423297	0	0.162042	3.53238	0	0	0	0.509554	0.676232	0.830923	25.6694	0.218119	10.7512	0.748981	1.1398	0.997624	1.30784
11671	Jup	NM_010593	3195	11.4193	0.00966195	0.0267934	71.9285	47.2029	67.4428	33.0319	83.0868	120.347	62.1472	77.5177	62.0196	26.4527	78.8722	15.0257	47.7109	106.803	36.4986	71.8162	54.6538	24.3047	41.387	34.1008	32.3352
18813	Ppp2r5b	NM_198168	2708	11.3787	0.009845	0.0272301	55.5469	51.1963	61.258	22.5616	93.6406	70.1513	48.5942	81.4601	19.9563	19.479	45.7923	72.4342	35.3624	121.133	44.0236	49.8146	30.0613	12.5893	27.0216	24.7677	25.8678
546	4930447C04Rik	NM_029444	1910	11.3771	0.00985228	0.0272448	6.0008	4.99763	0.288161	2.8526	2.47045	2.13618	5.88443	4.88004	8.92968	11.704	14.3761	0.616801	0	0.880083	0.272562	0	0	2.26655	2.58693	3.65456	2.90236
2501	Atf6b	NM_017406	2530	11.3732	0.00986994	0.0272827	86.5857	48.1609	81.3162	36.7106	95.6007	54.7669	185.285	133.857	26.1323	23.8723	42.3621	33.5267	68.594	75.5529	93.9332	90.4436	65.335	26.7361	41.6636	38.2059	40.2368
24742	Trim24	NM_145076	4035	11.3588	0.00993572	0.0274153	106.264	119.892	131.723	217.092	109.794	85.5457	84.84	120.01	77.6521	159.742	116.454	90.656	152.567	131.406	126.891	141.695	126.902	212.097	223.45	215.751	217.069
1887	Ankrd2	NM_020033	1100	11.343	0.0100087	0.0275783	7.2278	0	1.34191	0.378727	17.1584	0	4.2573	0	21.9511	0	0	0	0	3.71121	1.65643	0	0	0	0	0.827694	0.687213
1442	Adnp	NM_009628	4903	11.3401	0.010022	0.0276094	223.416	263.818	289.093	442.048	215.146	260.368	164.474	210.384	187.924	302.199	312.895	201.775	276.784	267.172	278.984	264.462	345.754	442.249	435.16	441.614	449.171
3680	Cbx5	NM_001110216	8902	11.3307	0.0100658	0.0277079	223.924	183.086	357.575	374.085	277.533	252.58	203.324	246.058	161.412	202.636	268.552	95.6817	185.025	330.478	447.873	336.284	315.666	345.795	391.732	376.854	381.958
26502	Zbtb22	NM_020625	2607	11.3272	0.010082	0.0277415	8.22846	3.05814	23.7758	7.8346	3.68695	12.3327	3.05376	15.4931	10.2912	4.51309	1.18916	0.338921	7.64633	31.5945	41.6355	12.8152	9.0579	7.88772	7.67144	6.69373	9.08551
13065	Maged1	NM_019791	2752	11.3093	0.0101657	0.0279165	1693.71	1122.66	1640.99	1227.54	2076.88	2078.36	1582.39	1897.01	1231.64	1295.99	1026.24	1132.93	1208.8	2098.23	1660.62	1569.96	1235.16	990.45	1308.62	1304.6	1306.49
4494	Cggbp1	NM_178647	4320	11.3039	0.0101913	0.02797	68.2625	68.9744	82.8982	149.947	43.6094	52.8525	108.837	102.024	59.2655	42.9863	68.2768	51.0642	87.5821	64.8703	56.6989	101.851	108.173	179.565	142.698	142.611	134.913
3528	Cand1	NM_027994	8209	11.2992	0.0102134	0.0280139	92.8821	80.5902	74.9589	138.483	103.145	102.109	94.5847	89.5921	100.546	67.3154	82.3279	57.6918	101.751	98.0556	50.8607	88.8454	62.0738	150.793	129.324	136.087	137.73
11897	Kdm3b	NM_001081256	7112	11.2645	0.0103782	0.0283986	66.8251	44.3277	95.8122	100.109	60.6455	72.3312	58.9329	50.6135	61.7593	96.6682	56.7296	26.2966	49.9569	94.7109	103.797	75.8706	108.871	85.8655	107.256	101.945	105.369
3909	Ccna2	NM_009828	2811	11.2577	0.010411	0.0284715	20.442	37.0757	61.4095	73.3504	13.6775	8.47663	19.9916	18.7899	51.8804	9.83607	30.5649	55.2164	25.4457	23.1509	100.933	75.572	45.982	90.0936	61.2702	76.6007	65.4372
10398	Hat1	NM_026115	1576	11.2455	0.0104699	0.0286041	31.4841	7.64793	48.357	76.6117	29.1638	41.0082	53.4863	31.2611	31.372	2.61292	8.99242	13.4553	0.496018	12.3421	78.7827	40.3977	61.9054	44.6371	84.2019	89.3517	88.2562
11669	Junb	NM_008416	1807	11.2365	0.0105133	0.0287171	23.4355	6.87719	19.5237	2.53215	4.35211	2.07731	27.7302	38.8094	26.4071	41.2372	11.2741	0.488969	8.86848	12.8906	0	14.6515	50.5527	1.94654	3.51564	2.43529	2.23113
15710	Nr1h2	NM_009473	1963	11.2316	0.0105373	0.0287599	32.8377	8.93758	33.7129	15.7433	24.2155	80.8954	31.4906	19.4453	11.9102	29.0694	7.21959	6.45159	13.1416	14.8021	55.1622	43.9938	20.8934	7.02957	17.8593	17.1611	20.9233
18055	Phf8	NM_001113354	6359	11.2093	0.0106465	0.0289866	20.6891	32.5827	32.5428	52.7755	26.9603	30.2078	13.7714	15.3558	19.7996	18.0397	48.2644	13.8948	35.5888	29.4931	18.9113	46.2935	35.4734	49.2718	53.688	57.3424	50.7998
7835	Fbxl15	NM_133694	1348	11.1984	0.0107002	0.0290956	30.4281	32.645	44.9892	8.06808	35.3931	11.3807	73.65	49.39	8.24551	4.50957	58.8093	11.5799	27.5459	18.3487	52.1366	47.6982	61.7732	3.61295	9.60001	8.21758	10.8418
9876	Gpbp1	NM_028487	3624	11.1984	0.0107001	0.0290956	126.369	157.226	166.241	280.721	94.5659	96.1932	137.751	180.406	164.562	84.7358	224.86	143.279	103.54	102.111	192.349	177.768	192.736	321.04	271.191	264.84	265.815
17784	Pdgfb	NM_011057	2942	11.1914	0.0107348	0.0291782	0.702246	0	0.542937	2.27911	0.415816	3.32843	0.318357	0.150867	0	0	0	0	0	0.0816237	0.176952	0.857055	1.05612	1.37952	2.15933	2.83682	2.74075
22499	Sp2	NM_001080964	3032	11.1898	0.0107426	0.0291936	24.9912	18.0992	54.0877	20.7436	37.2348	32.9423	26.2571	13.4678	7.83739	32.208	9.64046	18.3591	26.2981	62.2518	79.9262	27.4433	46.7294	20.1678	22.0388	21.5705	19.1975
4850	Clu	NM_013492	1808	11.1773	0.0108046	0.0293391	22.7949	39.715	18.0587	13.4146	23.2951	25.6361	14.764	27.7407	28.0884	17.245	21.8009	36.1637	61.1803	26.1654	5.90275	20.9192	19.2475	9.27838	14.8356	14.7715	14.773
26646	Zfp105	NM_009544	2004	11.1345	0.0110201	0.0298133	14.5145	6.08554	23.3281	49.2141	15.4355	8.714	10.9831	5.98003	25.915	20.0595	0.441993	14.1089	3.70578	17.9743	9.74164	33.6572	31.9392	40.5044	52.247	53.3072	50.798
4922	Cnot10	NM_153585	2853	11.13	0.0110434	0.0298647	37.792	83.061	48.7144	44.783	40.061	27.1721	28.3969	33.7595	24.9874	72.3752	31.9778	144.732	72.4732	51.7645	36.9506	50.818	55.3244	46.4701	44.0391	43.9329	44.6901
3037	Bex2	NM_009749	902	11.1243	0.0110723	0.029931	850.581	621.902	695.417	607.23	806.77	772.596	607.963	735.652	1337	843.507	812.104	479.007	574.593	888.4	591.295	671.597	630.376	631.729	561.873	612.359	622.961
12448	Ldb2	NM_001077398	2622	11.1145	0.0111227	0.0300379	6.70591	34.5747	22.9663	32.8717	1.33304	2.61425	8.03723	10.8339	0.36544	17.0516	17.2286	15.3889	71.1065	36.5426	10.3245	14.4248	30.5733	24.3533	34.2791	34.0295	38.825
2827	Basp1	NM_027395	1854	11.1079	0.0111564	0.0300984	2076.91	3260.73	1645.49	1755.4	918.298	927.729	2353.64	2294.19	2866.49	3101.11	3166.07	4364.78	2251.36	1086.31	872.148	2224.98	2398.53	2899.79	1495.1	1362.75	1263.97
3173	Brd8	NM_030147	4677	11.1076	0.0111578	0.0300984	59.5065	101.352	118.745	128.653	61.3178	59.9497	43.1555	55.1374	59.5357	77.9427	170.825	34.9497	98.2797	110.287	150.379	102.837	111.476	125.016	118.625	136.819	134.151
12016	Klf10	NM_013692	3045	11.1076	0.0111581	0.0300984	21.4851	62.844	33.0015	42.7852	14.3482	23.9581	20.7622	39.6478	25.2999	4.89429	40.7243	123.419	24.3888	28.154	20.4305	25.463	57.9583	50.7373	35.5443	42.1594	42.6997
8221	Foxj2	NM_021899	5011	11.0842	0.011279	0.0303594	29.5913	16.6701	47.4926	21.3467	36.4449	43.1542	34.2045	8.76896	18.7774	36.1977	11.843	9.4628	28.7043	67.0907	53.6073	31.449	37.8234	15.1186	24.4162	22.4694	23.3825
25081	Ttf1	NM_009442	4153	11.0722	0.0113417	0.0304985	1.88523	1.63195	6.2025	11.1633	2.48276	3.34032	0.9021	1.38937	0.599875	2.59695	0.21328	0.070918	4.61167	2.42855	3.69793	9.10712	9.57642	12.2483	9.74463	11.2538	11.4067
24727	Trim11	NM_053168	2252	11.0638	0.0113857	0.0305932	11.2938	47.7746	26.1033	18.8477	2.09527	11.088	7.69414	15.1761	25.614	6.09527	33.4321	61.4678	48.4239	4.26531	65.4209	16.5149	18.2121	18.2622	19.0152	19.2038	18.9095
1515	Ager	NM_007425	1370	11.0605	0.0114033	0.0306284	0.570604	0.849391	10.056	3.8099	1.78588	0	0.341827	1.29592	0	0	2.26287	0	0.285301	2.62924	31.1596	5.98156	0.453591	2.76494	3.77834	4.09819	4.59814
3839	Ccdc85b	NM_198616	4387	11.0517	0.0114497	0.0307472	18.2452	9.17255	16.3565	7.921	32.586	10.4909	12.8097	23.5736	10.746	19.2652	13.2247	8.05623	6.23669	21.4027	10.7987	15.5184	17.7063	7.95611	7.50861	9.09702	7.12224
18323	Plag1	NM_019969	4635	11.0388	0.011518	0.0309005	1.15548	6.91867	8.85552	17.9388	1.05573	1.02113	1.51554	3.25587	0	0.0846143	0.0955505	0	20.6605	2.38324	6.12132	16.7281	10.1894	16.6953	18.9854	17.3188	18.7556
10687	Hmg20a	NM_025812	3541	11.0366	0.0115297	0.0309199	94.6819	161.967	136.865	126.62	114.649	105.454	116.381	99.525	52.117	79.9659	164.594	138.736	182.572	162.284	105.853	119.451	159.874	90.7757	130.501	137.902	147.301
17884	Pelo	NM_134058	1572	11.0304	0.0115626	0.0309961	23.1337	68.8778	20.5892	11.3804	3.891	19.6219	27.7049	38.3993	41.3263	7.85871	27.8911	166.559	12.1834	30.5518	0	29.2726	22.5324	9.98285	13.4707	11.9696	10.0984
6022	Ddx54	NM_028041	3931	11.0215	0.0116102	0.0310877	42.6969	26.8953	54.2584	24.6904	51.3036	54.5536	55.9914	42.4544	12.9188	38.9593	27.1517	19.3301	34.2042	36.103	91.3786	50.0315	39.5205	19.41	25.5578	28.218	25.576
24722	Trib1	NM_144549	4026	10.9934	0.0117618	0.0314391	24.3386	16.7608	44.2192	16.5527	26.3922	33.2003	23.2639	25.0259	22.5147	15.6349	29.5911	2.63358	18.0577	25.4094	59.4816	32.0975	59.8884	13.3739	17.591	16.094	19.1518
23822	Tgif2	NM_173396	2791	10.9702	0.0118879	0.031727	1.45788	0.86603	6.64372	9.53537	2.12894	0.0584752	3.5236	2.54447	0	0.491815	0.952082	0.105526	1.54048	3.26951	11.8444	7.45325	4.00772	6.39828	11.2122	10.0583	10.4727
9734	Gmeb2	NM_198169	4050	10.9384	0.0120638	0.0321345	12.2873	6.58187	28.8799	15.0459	18.7275	15.9174	8.09412	8.54825	3.35956	19.0768	11.7007	2.25437	5.79055	36.3466	37.7912	18.3662	23.0155	11.8917	15.9182	15.8863	16.4874
26412	Xrn2	NM_011917	3367	10.9205	0.0121634	0.0323688	121.039	109.656	140.967	228.543	89.379	112.309	128.098	124.837	103.474	168.138	98.9139	87.0359	143.018	139.004	108.154	156.14	160.569	217.211	229.487	230.162	237.31
21455	Sik1	NM_010831	4509	10.9127	0.0122072	0.032479	46.3997	29.8878	54.985	25.1344	68.2922	58.8172	38.2203	64.4761	21.803	26.7895	31.2341	10.0591	48.3702	80.951	56.8623	47.6723	34.4544	21.3623	26.2996	27.0575	25.8181
7070	Elp5	NM_018740	1436	10.9123	0.0122096	0.0324792	172.996	108.42	123.221	103.44	174.153	144.793	167.624	199.671	195.24	156.493	44.411	120.803	160.047	140.136	145.737	102.72	104.291	84.2233	113.384	106.834	109.319
3651	Cbfa2t3	NM_001109873	7669	10.8822	0.01238	0.032882	46.9285	35.9368	99.8073	50.6059	67.5665	58.7995	48.4851	38.3718	42.8553	25.4929	25.063	6.14468	76.6027	143.099	80.8484	75.2097	100.072	48.5113	54.4576	51.1881	48.2665
10539	Hey2	NM_013904	2532	10.8397	0.0126248	0.0334046	0.206439	5.3	1.49205	9.02709	0	0.128913	1.10972	0	0	0	0	0	15.9	0.284522	0	2.73855	2.94512	7.80078	9.94303	9.10943	9.25511
23089	Suds3	NM_178622	2420	10.84	0.012623	0.0334046	50.8912	25.0998	81.8953	40.4681	56.6169	49.3659	54.5708	68.045	23.8358	52.9129	8.78433	37.1196	29.3954	73.1326	71.7429	63.5574	119.148	31.4174	39.5711	46.84	44.0441
19006	Prmt1	NM_019830	1272	10.8259	0.0127053	0.0335799	373.174	285.431	360.334	148.019	815.69	631.518	248.142	271.824	89.1895	182.682	123.253	234.321	498.718	518.597	505.655	231.926	185.156	94.2314	176.281	154.965	166.599
23355	Taf8	NM_022015	2779	10.804	0.0128345	0.0338425	7.28693	0.884354	10.3387	7.86536	3.39587	10.2773	6.74059	4.79149	16.9639	1.55238	2.23112	0	0.421946	9.76447	12.4575	8.84642	10.2862	5.84173	8.21263	9.33725	8.06982
14859	Mysm1	NM_177239	7419	10.7717	0.0130268	0.0342324	22.012	17.5809	32.1702	54.7416	25.1106	25.2099	17.6111	25.6655	27.6645	10.8104	23.4004	2.26281	27.0795	32.3678	29.261	38.4897	28.5624	53.793	54.4215	54.3038	56.448
5990	Ddx17	NM_199080	4772	10.762	0.0130847	0.0343582	340.767	420.89	634.162	554.422	444.484	394.262	312.856	304.985	386.005	202.011	403.341	337.17	522.16	685.789	647.796	574.091	628.972	536.603	543.35	572.951	564.785
26407	Xrcc5	NM_009533	2556	10.7454	0.0131851	0.0345891	9.37649	22.2004	24.2048	42.2672	24.8878	7.02365	5.13008	8.68254	8.84709	1.68782	34.6539	13.5969	18.3503	9.95873	54.0757	14.5507	18.2341	37.2615	42.2523	43.5165	46.0382
4253	Cdkn1b	NM_009875	2405	10.7359	0.0132433	0.0347088	7.94594	6.03533	31.8749	19.9556	8.2839	3.12158	12.0727	6.82848	3.42636	13.9426	9.20742	0.122463	8.77612	23.2648	45.2408	42.199	16.7951	10.2378	25.6322	20.0643	23.8881
26839	Zfp518a	NM_028319	6840	10.7334	0.0132583	0.0347415	20.1465	15.8102	26.5364	48.75	18.677	16.2727	8.83202	21.349	38.7476	17.0005	21.0431	9.47294	16.9145	12.3579	20.3214	29.7672	43.6992	60.087	49.5342	42.4617	42.9173
18182	Pik3r2	NM_008841	3159	10.7214	0.0133315	0.034908	41.0953	33.9291	57.1776	20.1964	35.4612	48.5635	74.4185	41.1676	14.62	32.3409	16.9636	34.5894	50.2343	43.6336	113.463	42.3037	29.3104	12.7619	23.8341	21.6159	22.5735
18701	Pphln1	NM_146062	4022	10.6981	0.0134757	0.0352481	62.784	43.0776	93.3443	107.727	78.5166	53.157	62.06	68.531	37.2601	77.1796	48.45	21.0164	59.7664	107.65	66.142	84.6337	114.952	113.69	102.668	108.545	106.004
8417	Gabpb1	NM_207669	2598	10.6819	0.0135762	0.0354807	59.2245	134.709	51.9322	115.148	32.9611	32.7916	25.7765	54.6699	94.2694	114.879	26.934	286.474	90.7198	38.9136	67.0279	42.9463	58.8411	138.722	102.882	107.062	111.926
13580	Mga	NM_013720	13931	10.6789	0.0135952	0.0355167	49.1786	61.72	56.6709	97.5125	54.2687	47.2239	45.247	32.4342	38.3246	77.5732	73.5002	63.0651	48.5947	43.7145	55.4936	68.3713	59.1042	107.968	97.8071	94.362	89.9133
4396	Cep290	NM_146009	8006	10.669	0.0136572	0.0356586	26.0887	22.1737	24.5938	58.6839	13.2501	21.853	25.7373	27.1655	52.924	15.6023	39.3312	9.71196	17.478	13.5576	20.7106	32.3607	31.7463	77.9332	51.1073	51.4974	54.1976
19828	Rbm15	NM_001045807	3270	10.6402	0.0138396	0.0360398	12.3113	3.82979	27.5791	20.6819	16.5141	18.3168	15.4669	15.6094	3.22325	4.73743	6.23007	0	5.25931	30.2558	19.2635	39.1327	21.6642	21.2649	17.0529	23.5273	20.8826
14870	Mzf1	NM_145819	3497	10.625	0.0139362	0.0362572	5.9214	0.111771	2.66338	1.68093	0.899544	1.35342	27.4527	1.26923	4.32923	0.224299	0	0	0.335312	0.412016	0	7.93138	2.31011	1.39269	1.9512	2.08284	1.297
14172	Mitf	NM_001113198	4890	10.624	0.0139426	0.0362601	3.23243	0.0301893	1.28683	3.00305	0	2.60326	1.43651	2.72301	0	12.6318	0.0905678	0	0	2.06253	2.18245	0.902362	0	2.98788	2.26145	3.41346	3.3494
26251	Wdtc1	NM_199306	4175	10.6216	0.0139585	0.0362785	31.0862	25.7463	46.7416	14.5942	49.8122	45.189	47.5594	18.1793	8.4458	17.3314	24.398	38.5172	14.3238	89.7853	51.1865	21.138	24.8568	10.0451	17.4141	14.3203	16.5974
18613	Pomc	NM_008895	1007	10.6204	0.0139658	0.0362865	10.6036	0	10.6323	2.90007	0.520639	44.4071	0	0	0	18.6941	0	0	0	24.5622	0	5.00786	12.9591	2.14951	3.73843	1.95896	3.7534
10763	Hnrnpdl	NM_016690	2750	10.5875	0.0141788	0.0367226	325.023	476.261	427.174	612.303	291.502	277.981	356.251	307.468	308.779	408.16	396.817	482.91	549.055	382.647	574.546	361.027	390.477	585.316	575.47	629.985	658.441
26915	Zfp654	NM_028059	4745	10.5765	0.014251	0.036889	21.8158	30.0307	18.9489	47.1916	13.1854	19.6395	15.1989	18.4275	25.9689	38.4748	22.0272	22.8418	45.223	16.2453	16.3474	17.4031	25.7997	59.3599	43.636	42.597	43.1735
25354	Uchl5	NM_001159866	1848	10.5597	0.0143613	0.0371121	71.0597	119.293	56.5872	75.2803	48.3242	76.0383	58.2844	104.238	107.64	31.8334	128.933	134.193	94.7545	73.0286	37.0444	42.2972	73.9785	88.4329	69.2621	77.4321	65.9942
10781	Hnrnpul1	NM_144922	2873	10.547	0.0144454	0.0372737	136.51	99.7782	286.934	153.977	194.47	225.805	100.735	98.256	78.7092	121.083	104.36	18.6575	176.317	268.555	478.555	170.92	229.707	95.2126	180.99	172.976	166.728
20706	Runx1t1	NM_001111027	6105	10.5446	0.0144612	0.0373076	257.505	381.613	401.861	530.573	215.009	212.767	262.955	219.635	274.758	359.906	500.041	371.036	273.764	485.899	324.721	468.049	328.777	609.258	501.523	519.856	491.656
4935	Cnot6	NM_212484	2501	10.542	0.0144784	0.0373381	48.5224	72.6391	119.583	110.216	56.8097	45.4831	57.1101	68.3258	21.3015	42.1041	38.9576	128.949	50.0104	81.7099	112.195	117.705	166.722	108.725	113.834	114.733	103.572
2139	Arf4	NM_007479	2042	10.5332	0.0145372	0.0374826	452.317	645.302	433.41	594.069	367.666	371.725	507.06	533.621	386.746	547.084	724.392	691.45	520.065	359.617	422.44	448.849	502.735	778.716	534.755	526.273	536.533
24792	Trim62	NM_178110	3198	10.5126	0.0146756	0.0377762	97.7061	96.8344	106.519	57.995	142.465	132.839	93.5727	116.445	42.7857	58.1291	57.8869	143.762	88.8545	145.824	109.149	89.686	81.418	45.941	63.4202	60.6881	61.9308
12481	Lemd2	NM_146075	2596	10.51	0.0146935	0.0377943	37.4394	41.8624	24.2356	18.4056	55.4039	30.5536	34.9964	16.9265	21.0387	65.717	15.5246	40.5025	69.5602	10.4528	20.8558	36.9088	28.7251	17.7183	18.852	19.2895	17.7627
23393	Tardbp	NM_145556	7454	10.5085	0.0147034	0.0378126	104.819	144.513	130.175	221.68	82.7385	85.0834	67.2863	88.9013	154.77	150.135	128.157	166.741	138.642	113.819	154.069	126.428	126.385	254.816	199.145	217.559	215.199
18792	Ppp1r8	NM_146154	2041	10.4929	0.0148093	0.0380286	40.6034	16.5884	67.1398	18.9885	73.2097	14.0735	32.1227	46.973	33.2384	44.0034	9.11358	1.01012	39.6416	144.247	69.506	21.6195	33.187	10.7379	21.5575	21.1891	22.4694
23983	Tle4	NM_011600	4555	10.4855	0.0148595	0.0381361	76.1096	57.9467	100.13	150.09	63.2287	98.3883	84.6132	95.6887	44.0071	70.7315	48.5171	54.7016	70.6212	53.7211	56.4024	159.702	130.696	140.898	145.253	158.373	155.834
19801	Rbck1	NM_001083921	2397	10.4789	0.0149049	0.0382386	39.0614	55.3237	80.2769	34.0298	60.8056	58.9632	35.5574	38.8856	18.0684	22.0881	27.7144	47.9198	90.337	128.033	58.5315	72.5826	61.9605	27.0908	38.871	33.9952	36.162
18037	Phf12	NM_174852	4390	10.477	0.0149179	0.0382635	49.4595	68.5942	118.449	74.2763	75.5176	55.8017	65.0717	29.4216	45.6175	25.3269	89.685	18.2483	97.8491	143.207	107.736	103.242	119.613	66.9952	80.7695	75.5263	73.814
993	Abca2	NM_007379	8061	10.4748	0.0149325	0.0382881	33.6395	33.2085	40.1637	20.3899	54.1346	43.509	31.3131	32.156	17.6874	23.0369	37.4695	11.7283	50.4276	44.5062	34.9064	48.1707	33.0715	15.0037	24.022	21.2152	21.3186
10851	Hp1bp3	NM_010470	3311	10.472	0.0149523	0.0383245	160.423	265.694	271.347	238.291	157.924	157.684	167.463	155.1	239.734	84.6324	245.047	285.36	266.674	221.062	331.208	297.952	235.167	247.116	231.948	238.18	235.92
21791	Slc30a9	NM_178651	3411	10.4681	0.0149792	0.0383793	128.768	64.5105	94.6664	108.384	123.117	112.296	164.476	173.064	126.241	73.4129	75.5656	42.2227	75.7432	103.489	39.9869	89.4448	145.745	87.1756	109.884	115.843	120.633
21266	Sf1	NM_001110791	4361	10.4624	0.0150179	0.0384428	107.892	109.444	214.403	109.644	183.297	161.071	113.935	93.6352	46.4042	49.0122	100.031	62.4028	165.899	246.8	305.361	146.714	158.739	104.977	104.021	115.174	114.404
10462	Hdac6	NM_010413	4142	10.4559	0.0150628	0.0385152	26.5674	39.5885	58.0651	32.9264	45.146	27.9362	26.5696	29.5758	11.3816	18.7951	45.7632	27.5182	45.4842	70.9627	63.2831	45.5043	52.5101	23.843	34.0264	35.0235	38.8126
23707	Tenm2	NM_011856	9738	10.4362	0.0152001	0.0387875	199.61	165.448	156.641	133.566	247.875	291.448	164.324	150.731	195.376	147.906	225.85	102.197	168.298	165.122	229.53	86.4178	145.496	140.203	133.977	130.396	129.689
22202	Smurf1	NM_001038627	5333	10.4236	0.0152881	0.038976	72.4256	68.4278	94.8489	51.5081	87.3643	94.5317	62.9614	67.747	38.6652	83.2837	62.2834	37.1674	105.833	121.397	94.396	65.956	97.6467	42.5666	53.8695	53.4646	56.1316
22873	Ssu72	NM_026899	1451	10.4022	0.0154392	0.0392602	148.061	138.433	119.948	95.792	144.771	161.63	179.769	163.041	95.2241	143.928	148.948	159.947	106.403	78.2803	77.8558	172.905	150.751	85.0308	96.8068	101.651	99.6798
15025	Ncoa3	NM_008679	7531	10.3975	0.0154727	0.0393163	48.1181	38.7028	31.9431	37.073	77.9476	49.7349	40.8545	37.8962	57.3308	24.9446	39.4596	31.5993	45.0496	32.7155	25.3695	32.2255	37.4618	35.0293	37.1786	37.941	38.143
20869	Scap	NM_001001144	4286	10.3961	0.0154822	0.0393334	62.5155	56.952	87.3151	37.8433	85.872	93.2541	68.5081	62.8599	41.4483	23.1506	91.0346	25.0131	54.8083	81.521	145.088	70.8902	51.7608	24.999	47.1014	41.3525	37.9202
20611	Rrn3	NM_001039521	3598	10.3938	0.0154989	0.0393586	163.097	99.302	151.118	119.488	140.907	170.734	189.898	202.558	97.4696	177.018	61.6679	90.4523	145.786	122.738	127.399	177.476	176.858	117.613	119.017	115.474	125.849
6561	Drd2	NM_010077	1549	10.3823	0.015581	0.0395334	2.41542	24.3577	1.16611	7.98172	0	7.90208	0	6.59043	0	0	30.3066	39.7387	3.02798	2.63546	0	1.6278	0.401175	7.68564	7.29103	8.81662	8.13357
23017	Stox1	NM_001033260	3102	10.375	0.0156334	0.0396448	0.322397	5.2011	1.85528	1.80446	1.01409	0	0	0.858513	0.0617785	0	12.1356	0.569676	2.89808	0.696722	0.6713	3.04818	3.00493	1.13391	2.27551	1.85889	1.94954
3933	Ccnl1	NM_019937	2145	10.3641	0.0157115	0.0397845	88.2505	112.963	170.88	185.982	77.726	87.9553	80.1245	110.29	94.9697	78.4374	120.785	143.211	74.8925	110.608	240.395	158.693	173.824	200.31	172.434	183.932	187.251
14593	Mterf2	NM_028832	1565	10.3163	0.0160604	0.0405788	21.1662	5.66253	17.0654	41.0882	15.4103	20.3353	36.8059	9.64278	18.4902	26.3129	6.79172	3.95206	6.24381	6.75145	1.66324	20.1394	39.7073	44.2593	38.6383	39.754	41.7011
26778	Zfp386	NM_001004066	2065	10.3157	0.0160649	0.0405828	48.25	75.1294	71.7324	130.769	64.996	45.9185	85.2696	40.6237	16.7972	35.8951	57.4775	115.67	52.2411	58.4934	54.0762	93.4099	80.9501	145.963	144.249	118.529	114.336
19411	Puf60	NM_001164600	1831	10.3068	0.0161303	0.0407108	201.621	308.569	161.748	287.769	105.563	127.016	147.575	174.777	395.729	259.066	319.036	272.164	334.506	139.807	171.73	177.301	158.155	330.417	251.607	285.835	283.217
17911	Pex14	NM_019781	1942	10.3018	0.0161678	0.0407908	25.5098	11.1869	28.7995	10.0412	37.616	18.2365	24.8379	27.655	13.8152	30.8984	12.999	17.7441	2.81775	34.9942	32.7046	32.4595	15.0395	7.80221	10.4195	11.1737	10.7694
4937	Cnot6l	NM_178854	3169	10.2944	0.0162223	0.0409134	21.6864	28.0362	50.8772	53.5632	16.0478	20.2911	21.5753	29.5527	9.91747	32.7338	31.3046	22.9558	29.8481	26.2188	66.9428	51.5192	58.828	48.4959	54.1258	54.7791	56.8521
24696	Trappc9	NM_180662	4047	10.294	0.0162258	0.0409146	29.0788	23.2104	49.4281	19.6119	22.0665	45.6101	43.2778	38.2763	16.7629	8.47946	31.8451	15.2829	22.5033	52.3946	36.0183	41.2766	68.023	13.4382	21.6858	20.66	22.6637
6461	Dnttip2	NM_153806	2403	10.291	0.016248	0.0409407	50.0323	90.4564	72.6206	115.608	66.9809	55.3522	38.9765	83.857	30.4641	24.5627	84.4101	92.7813	94.1778	44.8695	87.8488	55.875	101.889	127.572	106.922	118.465	109.474
26662	Zfp13	NM_011747	2139	10.2901	0.0162544	0.0409481	21.1933	4.33955	19.6357	9.60124	18.7915	53.5621	24.9586	13.4878	13.9763	2.38356	2.48458	5.78305	4.75101	16.7276	17.7669	12.6721	31.376	5.8187	11.1099	9.93181	11.5446
18821	Ppp3cb	NM_008914	3881	10.2845	0.0162966	0.041026	203.111	255.383	187.704	284.474	209.615	191.211	211.889	190.647	222.498	192.809	278.438	261.815	225.896	213.778	185.715	182.076	169.245	283.537	264.448	281.514	308.399
5077	Coprs	NM_025556	802	10.2772	0.0163511	0.0411122	151.418	177.996	124.198	94.1314	224.008	119.656	136.053	166.583	111.35	150.86	81.7279	284.607	167.652	123.063	81.789	151.696	140.246	77.5948	107.376	92.9006	98.6547
12858	Lrrfip1	NM_008515	2849	10.2475	0.0165754	0.0415842	47.2973	79.7755	49.9607	32.8785	59.0103	92.0566	34.0255	39.4154	23.0718	36.204	47.2568	161.476	30.594	40.1211	86.4306	30.9761	42.315	31.3401	33.9428	34.8335	31.3977
22095	Smarca4	NM_001174078	6376	10.2358	0.0166645	0.0417775	308.789	210.697	438.666	333.321	362.515	353.899	288.356	263.833	285.472	298.661	288.398	115.158	228.534	464.719	561.132	335.746	393.065	265.18	358.762	357.655	351.686
19238	Psmc6	NM_025959	1564	10.2089	0.0168711	0.0421807	157.721	106.614	147.296	277.015	80.0058	88.6979	222.773	233.561	164.435	156.85	101.375	90.0139	128.455	105.329	140.467	174.922	168.467	297.903	256.349	272.829	280.978
2849	Bbs7	NM_027810	2598	10.2058	0.0168956	0.0422267	15.8111	27.9427	20.248	52.2027	14.7316	11.8728	21.0898	12.1299	25.0795	9.96319	32.389	5.10143	46.3378	8.87342	14.2271	34.2115	23.68	49.0524	57.4181	52.0999	50.2404
4932	Cnot4	NM_001164413	3526	10.2043	0.0169072	0.0422405	74.8441	124.557	78.3188	143.125	44.0621	59.2923	112.759	36.8827	115.874	80.1948	157.883	109.924	105.863	79.1376	56.843	74.3708	102.924	168.358	136.261	135.175	132.706
15218	Nfe2l2	NM_010902	2469	10.1974	0.0169608	0.0423438	2.94457	1.46641	5.43499	18.8906	8.21074	1.18982	7.77659	0.17977	0.310469	0	3.40812	0.357864	0.633232	1.94522	9.91004	4.85092	5.03378	18.4106	20.0123	19.79	17.3496
15597	Npat	NM_001081152	7347	10.1632	0.0172283	0.0429342	16.2855	15.0144	24.3432	43.7711	14.8429	18.1264	18.676	19.2716	2.34753	24.4483	16.8181	9.01967	19.2053	13.8911	22.0723	30.0296	31.3797	47.2493	43.2657	41.2871	43.2825
12760	Lrpprc	NM_028233	4621	10.1622	0.0172365	0.042947	95.134	86.7063	68.7176	75.2119	92.959	71.1656	88.5732	85.0051	105.668	127.433	99.0027	109.689	51.427	65.1659	59.2019	67.9337	82.5691	75.3566	75.3572	75.5928	74.541
26471	Yy2	NM_001098723	2867	10.1502	0.0173313	0.0431367	2.29651	2.07078	8.44724	9.66929	2.56016	1.93545	1.1434	1.70295	2.60685	3.83022	2.00816	2.56821	1.63598	7.37079	1.54344	11.6531	13.2217	9.05988	9.35569	8.04502	12.2166
22749	Spty2d1	NM_175318	5225	10.1279	0.0175097	0.0435337	3.7311	3.03505	12.6568	10.8379	2.87645	2.71747	5.82578	4.67212	5.28148	1.01331	3.4752	0.169104	5.46085	10.2489	19.2296	6.8767	14.2718	10.3567	9.95187	10.7455	12.2975
13396	Mdm4	NM_008575	3490	10.125	0.0175329	0.0435836	66.5848	73.8209	111.045	147.013	74.912	76.5049	51.3925	61.6813	89.394	45.6241	78.931	27.8488	114.683	116.284	107.251	102.592	118.052	128.617	148.858	157.657	152.92
3611	Cask	NM_009806	8258	10.1213	0.0175631	0.0436351	221.382	229.149	178.179	181.927	232.535	237	147.67	171.994	271.049	268.044	176.979	294.023	216.446	186.02	175.979	136.027	214.69	169.36	184.03	186.051	188.266
18195	Pin1	NM_023371	3808	10.1193	0.0175785	0.0436578	32.9459	27.9584	31.0523	15.4529	43.0478	25.2435	48.5766	38.3474	32.0066	10.4535	28.6102	20.2639	35.0011	20.621	16.8154	31.452	55.3207	10.3737	16.8063	17.4936	17.1382
4523	Chd2	NM_001081345	9071	10.109	0.0176622	0.0438263	36.8403	33.764	57.4951	78.6347	31.9815	46.5989	16.6237	46.1417	51.4849	28.211	55.268	24.0917	21.9324	58.0818	68.7257	53.3006	49.8725	68.9623	81.1614	83.3579	81.0574
3496	Camk1	NM_133926	1434	10.1084	0.0176665	0.0438292	49.1059	71.7402	31.707	32.441	47.4074	55.5395	54.2108	28.4758	75.7728	33.2293	21.31	82.9756	110.935	30.3102	13.7954	27.2542	55.4684	27.3588	31.5029	33.6503	37.252
2036	Apex1	NM_009687	1185	10.1019	0.0177199	0.0439536	98.1567	74.4358	245.752	95.8424	103.235	125.605	173.094	132.594	15.525	38.8878	46.7169	97.4285	79.162	169.413	560.132	160.118	93.344	92.7015	95.1078	97.321	98.2395
22812	Srsf10	NM_001080387	2716	10.0959	0.017768	0.0440651	62.1696	80.0183	71.2744	132.914	59.5192	39.5993	71.3834	59.4852	83.6824	59.3479	68.9753	70.4859	100.594	51.3695	72.4537	94.6939	66.5807	169.754	121.715	124.591	115.598
20118	Rhoa	NM_016802	2126	10.0872	0.0178389	0.0442172	105.04	159.684	91.5507	166.299	64.4463	70.0105	114.322	100.42	154.68	126.363	130.405	211.679	136.967	53.0876	85.7045	123.938	103.473	163.156	170.766	162.736	168.538
24359	Tmf1	NM_001081111	6781	10.0751	0.0179385	0.0444163	38.8806	42.6851	35.2393	74.8669	44.8952	39.3028	33.978	34.233	28.9957	51.8791	54.6003	13.6815	59.7735	26.5953	38.9236	39.973	35.4652	76.1713	75.3642	75.0999	72.8324
21494	Sirt6	NM_181586	1703	10.0654	0.0180186	0.0445989	48.432	39.8865	72.1622	29.1538	48.026	54.1458	55.8223	46.9132	43.8863	41.798	29.3864	65.0267	25.2465	96.0265	52.8847	75.8806	63.857	20.9719	32.0533	31.1864	32.4035
5828	Dand5	NM_201227	1584	10.0481	0.0181615	0.0448723	10.9232	1.43598	11.6362	11.7115	15.5564	6.90321	4.43468	25.2188	8.22684	5.19945	2.51634	0.557808	1.23378	21.3758	8.54509	10.3469	6.27697	8.71152	13.3686	12.3579	12.408
12169	Kmt2d	NM_001033276	19803	10.0156	0.018434	0.0454645	39.7114	32.5486	88.7475	43.5535	70.5293	72.5407	27.7628	21.3375	36.4829	9.61505	36.8113	9.16153	51.6728	89.395	144.64	56.4377	64.5174	34.2396	47.4781	46.8419	45.6545
5558	Cxxc5	NM_133687	2272	10.0066	0.0185101	0.0455809	151.733	102.074	239.154	135.974	151.916	87.5642	187.156	235.796	118.845	129.118	74.0727	98.6495	133.499	124.085	204.732	237.496	390.302	118.731	144.466	137.518	143.179
3298	C1qbp	NM_007573	1165	9.99641	0.0185966	0.0457514	266.2	226.915	206.1	191.129	247.516	210.554	226.715	291.837	297.572	323.007	182.473	243.961	254.312	204.271	150.145	191.544	278.439	210.649	183.383	182.744	187.74
24865	Trp53bp1	NM_013735	7709	9.9658	0.0188591	0.0462739	179.537	109.069	178.314	234.179	172.245	199.491	174.042	148.142	160.016	223.286	150.862	52.2263	124.119	159.582	187.262	207.287	159.123	217.642	236.081	242.29	240.701
20210	Ripk2	NM_138952	1901	9.96009	0.0189084	0.0463702	4.89638	4.0945	33.2716	11.2171	9.46892	6.95399	7.88305	0.233483	4.83881	0	8.15396	3.71833	0.411217	57.8552	45.7333	28.5173	0.980673	12.2404	11.1393	11.4147	10.0738
18042	Phf2	NM_011078	5259	9.95966	0.0189122	0.0463712	43.5915	79.3009	80.3934	68.4491	39.4451	67.963	41.4963	29.0331	31.484	52.1276	59.3702	117.439	61.0931	87.5342	105.079	53.0997	75.8607	61.7386	69.5259	72.6259	69.906
20811	Sap25	NM_001081962	1064	9.9573	0.0189326	0.0464048	15.3011	27.1531	66.4991	12.3186	18.0674	36.9664	1.76054	0	8.10495	26.9076	39.5426	27.9575	13.9594	88.6972	123.298	18.9583	35.0425	7.37455	13.047	15.1173	13.7356
19817	Rbl1	NM_011249	4874	9.95281	0.0189716	0.0464838	3.52769	0.675815	7.41548	13.3986	1.79279	2.1765	14.7966	0	2.31977	0.0804652	1.72644	0.0604273	0.24058	2.46345	4.37922	8.79458	14.0247	13.4896	12.6961	13.6053	13.8035
15029	Ncoa6	NM_019825	6863	9.94621	0.0190289	0.0465915	124.481	136.094	213.117	221.717	136.87	164.75	115.864	97.1389	99.7138	132.548	194.045	88.1464	126.092	241.117	169.65	198.946	242.755	235.797	218.454	220.109	212.509
22809	Srrt	NM_031405	3024	9.93618	0.0191165	0.0467563	90.0011	124.675	153.511	81.7649	114.311	159.642	69.6879	68.3977	43.4732	84.494	144.257	73.6306	156.138	160.965	238.347	100.475	114.256	65.495	85.1984	90.3739	85.9925
25663	Vhl	NM_009507	2730	9.93217	0.0191516	0.0468257	62.0097	93.7912	55.0645	51.9001	70.0326	42.2657	51.9765	68.7726	57.7719	81.2388	47.8566	184.265	49.2515	43.5413	34.0388	77.1215	65.5564	50.2486	52.9181	51.9153	52.5185
10656	Hist2h2ac	NM_175662	390	9.90846	0.0193605	0.0472528	16.4062	2.71702	41.9665	7.06773	21.061	10.0433	3.60233	25.0378	0.982754	37.7103	1.13558	0	7.01548	21.5507	122.139	19.3958	4.78015	3.46884	7.84292	8.55991	8.39927
8616	Gem	NM_010276	2257	9.88092	0.019606	0.0477678	2.71618	0.260173	10.5414	1.5222	1.31632	0.795413	4.35727	9.04615	0	0.781942	0	0.260986	0.519533	0	3.2292	8.0995	30.8369	1.43856	1.56372	1.41188	1.67464
3105	Bmp6	NM_007556	2410	9.87682	0.0196428	0.047841	1.65169	0	11.326	3.28412	0	0	9.91014	0	0	0	0	0	0	0	18.4692	1.30781	25.5272	1.79631	3.90519	3.14821	4.28676
11384	Ino80d	NM_001114609	13529	9.86384	0.0197597	0.048085	33.5932	50.385	52.9372	65.2258	37.6288	33.8496	30.8071	27.9191	36.8146	34.54	56.0757	66.5065	28.5729	64.0235	44.3095	56.5646	46.8511	61.3376	66.3654	67.3981	65.8022
13098	Maml1	NM_175334	5552	9.86288	0.0197684	0.0480959	13.7757	21.832	39.8552	17.3759	11.2374	14.8448	9.70007	15.5892	5.00493	26.2777	20.9792	5.09261	39.4241	28.0708	77.592	26.0003	27.7579	16.6669	19.24	17.9841	15.6125
8060	Fhit	NM_010210	987	9.85303	0.0198577	0.048296	9.73615	0.14957	2.85361	5.95542	2.65595	6.94486	5.21918	22.9346	0	20.6623	0.44871	0	0	0	0	5.748	5.66644	5.20853	7.1516	6.61093	4.85064
20126	Rhog	NM_019566	1264	9.85062	0.0198795	0.0483407	1.94995	0.116792	7.51863	9.56801	4.42434	5.42292	1.85246	0	0	0	0.350377	0	0	18.0483	0.205931	1.49612	10.3242	5.1374	11.1687	10.2043	11.7616
26761	Zfp36	NM_011756	1765	9.81909	0.0201682	0.0489138	2.56897	10.3344	39.8614	18.1277	6.73301	0.647269	2.9186	3.26916	1.84579	0	0	0	31.0032	2.7211	13.4204	25.3574	117.946	12.5704	16.93	18.3124	24.6981
1730	Alkbh4	NM_028070	1713	9.8066	0.0202837	0.0491078	24.8627	8.77108	15.2816	7.94597	26.0153	23.8185	21.0504	10.8825	35.1278	32.2816	1.03415	14.0986	11.1805	17.9437	6.2301	22.0793	14.8734	6.94983	9.06537	7.97253	7.79617
3262	Btrc	NM_001037758	6325	9.77329	0.0205949	0.0497742	57.4616	35.9826	49.5702	38.5609	48.795	63.269	90.6249	44.4202	46.5988	51.0618	39.2112	43.7709	24.9657	36.106	65.7635	43.6521	52.7593	30.6717	43.0771	42.6082	37.8863
3656	Cbfb	NM_001161458	2906	9.75338	0.0207831	0.0501243	37.536	53.5254	43.4837	100.919	19.7253	26.2834	20.3049	76.3681	25.7846	56.7497	69.3424	66.4854	24.7483	32.4755	29.5588	64.6416	47.2587	130.816	93.8397	94.0436	84.9754
15720	Nr1i2	NM_010936	2527	9.75088	0.0208069	0.0501727	1.34185	0	2.43625	0.471502	0.138315	6.78134	0	1.05386	0	0.0775994	0	0	0	2.6608	6.5924	0	0.491824	0.428286	0.279328	0.480392	0.698
26924	Zfp668	NM_146259	3451	9.73288	0.0209787	0.0505237	21.6908	14.1052	45.2298	29.5423	42.4876	15.1334	26.1902	22.3791	13.2719	10.6826	18.6083	13.7404	9.96693	60.6779	42.1634	45.6653	32.4125	29.7148	32.3171	28.5372	27.6
23747	Tex261	NM_009357	1452	9.70829	0.0212157	0.0509965	8.80982	0.687812	8.52441	6.12152	8.78621	15.6235	4.51532	18.9523	0.659907	4.32162	1.52506	0	0.538378	8.93071	7.88778	11.2875	5.99165	2.79514	8.26423	8.04702	5.37969
5172	Cpne1	NM_170588	3519	9.70422	0.0212551	0.0510669	37.5122	54.9563	21.4393	48.246	27.6122	11.038	36.4635	18.415	55.9826	75.5621	41.7832	57.331	65.7546	13.1703	17.6786	36.5429	18.3653	56.359	51.0157	42.4314	43.1778
2793	Bach2	NM_001109661	8493	9.68488	0.0214438	0.051413	104.094	106.852	198.64	152.21	119.471	96.4275	121.142	95.4283	117.401	74.6924	135.006	37.3138	148.236	194.247	209.451	169.968	220.896	160.691	147.439	145.955	154.753
20591	Rqcd1	NM_021383	3266	9.6813	0.0214788	0.051485	63.0312	28.7331	55.9745	42.505	63.9436	82.1518	78.4328	76.9197	48.76	27.9791	17.4927	21.9133	46.7934	78.232	48.1382	61.3766	36.1512	36.4515	44.5216	45.7648	43.2822
10195	Gtf2a1	NM_031391	5703	9.66792	0.0216105	0.0517411	57.221	56.2658	54.437	107.65	54.3314	36.1436	71.7686	63.5074	85.116	32.4588	64.7658	46.3241	57.7075	39.328	48.7457	84.9991	44.6751	101.671	101.739	112.311	114.877
19350	Ptpn14	NM_008976	10744	9.65237	0.0217644	0.0519596	1.23308	0.173885	2.49369	3.71917	0.0325319	1.00256	0.130762	0.660985	4.49484	1.07684	0.329767	0.191889	0	1.3187	0.702588	6.16049	1.793	2.5687	4.18279	4.13821	3.98699
12642	Lmo3	NM_207222	2101	9.64857	0.0218023	0.0520293	15.3916	13.6247	31.3893	128.574	11.4788	23.1484	3.78922	53.6593	0.273637	0	0	38.2697	2.60451	20.0019	27.2562	36.0037	42.2956	139.213	123.747	126.249	125.089
12571	Lin28a	NM_145833	3480	9.64341	0.0218536	0.052125	0.598033	0.721159	0	1.4598	2.96291	0.187591	0	0.38263	0.0550681	0	2.16348	0	0	0	0	0	0	1.16625	1.35223	1.22093	2.09982
23838	Tgs1	NM_054089	4325	9.63618	0.0219259	0.0522703	102.618	109.29	84.5968	169.289	92.9771	65.5836	87.3804	73.1713	140.947	155.651	147.967	90.7061	89.1979	73.3458	70.8368	107.708	86.4959	191.995	167.394	162.269	155.498
21256	Setd8	NM_030241	2738	9.63113	0.0219765	0.052364	66.2966	117.074	83.3528	81.6204	55.0836	75.1049	63.4552	48.146	101.488	54.5023	123.093	108.214	119.914	83.1445	107.617	72.2916	70.358	71.0517	87.9965	83.6864	83.7472
24745	Trim27	NM_009054	2310	9.61329	0.0221562	0.0527377	42.8572	16.2463	26.6971	43.1388	43.6525	17.6628	57.3721	50.5337	33.8476	54.0743	11.695	15.5549	21.489	17.2566	16.7897	45.5718	27.1703	43.4551	41.4554	44.0123	43.6325
10385	Hap1	NM_010404	3706	9.59402	0.0223519	0.0530847	27.0395	15.5409	38.4432	14.3615	52.7679	29.065	22.8718	36.5285	4.65389	16.35	11.2332	23.6826	11.7069	43.4138	37.1551	42.183	31.0207	11.2433	14.8563	15.4364	15.9101
23808	Tgfb2	NM_009367	4725	9.59027	0.0223902	0.0531483	28.1641	9.56387	35.2461	44.673	34.7303	10.7767	14.6685	30.4355	9.89617	68.4771	11.1539	4.55029	12.9874	71.05	28.9219	17.0765	23.9362	45.4671	50.9416	39.887	42.3963
15722	Nr2c1	NM_011629	3827	9.5754	0.0225427	0.0534279	7.046	7.64632	12.8125	23.7777	11.6447	7.76147	6.24077	6.37884	4.30645	5.94378	11.1095	1.61614	10.2133	7.969	7.54976	12.0242	23.7071	26.7247	22.9939	21.689	23.7032
3527	Camta2	NM_178116	4647	9.57145	0.0225833	0.0535059	25.2005	15.3366	36.2809	15.446	35.8022	35.8579	29.8295	19.1027	6.51574	24.095	17.5359	5.00694	23.4669	33.7959	46.8276	40.8306	23.6693	11.936	17.5693	16.0658	16.2129
6290	Dll1	NM_007865	3428	9.56306	0.0226698	0.053665	12.5742	8.6906	24.0787	40.8988	8.36081	8.80769	12.1584	19.5512	21.0756	5.49154	1.80871	1.11692	23.1462	14.2205	26.5764	28.8702	26.6478	44.7529	35.7599	41.6986	41.3838
5415	Ctdspl2	NM_212450	4545	9.56091	0.0226921	0.0536994	15.2838	24.5035	33.5204	45.2381	14.3039	8.11532	6.18221	20.8986	8.98101	33.2216	23.3862	20.2828	29.8414	28.7425	22.7939	35.9218	46.6236	47.5059	44.8832	42.9357	45.6277
5438	Ctnnbip1	NM_023465	2669	9.55979	0.0227037	0.0537177	69.8809	85.3832	66.4518	44.9636	94.9434	56.2562	87.73	66.5195	77.6887	36.1476	53.7625	109.687	92.6998	114.355	64.7572	55.0299	31.6647	41.1582	41.1687	47.0184	50.5089
20203	Ring1	NM_009066	2032	9.55802	0.022722	0.0537301	15.0545	8.13208	33.1464	9.71721	4.47224	33.5725	10.3709	5.6792	14.7123	21.5201	6.53853	3.62355	14.2342	41.3622	60.7188	16.1314	14.3734	7.05718	9.49487	12.3964	9.92039
26869	Zfp579	NM_026741	2159	9.55287	0.0227756	0.0538049	29.4063	52.459	39.5946	17.4824	22.1791	38.2498	31.6685	25.6977	44.2922	14.3505	22.3592	21.1445	113.873	23.6911	75.1111	40.2919	19.2844	16.4171	17.1098	16.0951	20.3076
20732	Rxrb	NM_011306	2577	9.53347	0.022978	0.054193	16.6211	11.4275	38.9974	7.99038	20.616	21.0893	20.7165	19.1182	0	18.1864	9.96773	10.0574	14.2573	58.3336	25.5549	34.001	38.1002	3.77978	10.1346	9.83362	8.21348
25367	Ucp1	NM_009463	1644	9.51473	0.0231752	0.0545813	0.0496363	0.897966	2.18064	2.01199	0	0.297818	0	0	0	0	2.6939	0	0	3.79778	0	0.766867	4.15792	1.31664	1.57431	1.93833	3.2187
21467	Sin3b	NM_009188	4117	9.47959	0.0235495	0.0552561	41.39	45.7314	61.9723	30.2442	47.8397	46.341	45.3857	31.9116	29.232	47.6302	39.6943	75.7589	21.7409	62.0611	53.4882	61.3981	70.9418	18.4016	35.776	33.5038	33.2951
18820	Ppp3ca	NM_008913	2194	9.47298	0.0236205	0.055404	154.544	200.484	285.836	252.584	166.159	195.711	129.562	108.029	197.402	130.401	192.976	214.113	194.362	300.226	295.177	270.936	277.005	225.557	260.489	258.532	265.76
15007	Nck1	NM_010878	1685	9.46616	0.0236941	0.0555483	34.1713	19.0335	31.4673	75.2709	44.5978	32.1566	23.3457	24.234	18.0832	62.6103	29.1747	6.81684	21.1089	10.4036	20.2367	57.6119	37.6171	87.6742	72.7506	73.2153	67.4434
19977	Rel	NM_009044	2584	9.46165	0.0237428	0.0556437	4.97062	2.00119	17.8014	5.26032	4.39609	2.52638	0	7.90138	10.9019	4.09793	3.42784	0.911834	1.66389	6.78405	13.5991	5.61083	45.2116	5.23548	4.82594	5.22647	5.75337
6556	Drap1	NM_024176	916	9.46026	0.0237579	0.0556602	150.066	157.354	151.96	84.629	155.683	73.9408	239.775	163.779	80.5461	186.674	154.233	122.825	195.004	164.111	78.43	165.849	199.451	55.8271	92.4711	96.4137	93.804
15731	Nr2f6	NM_010150	2218	9.44915	0.0238785	0.0558671	18.3869	5.44621	14.594	7.13042	18.6738	14.7163	20.0581	25.2143	7.25767	24.4012	10.383	1.72624	4.22935	5.19683	7.62817	31.2624	14.2887	3.65964	8.06215	8.62026	8.17963
3683	Cbx7	NM_144811	2893	9.44782	0.023893	0.0558822	1.47612	0.799537	8.20956	1.79588	2.41633	1.2411	1.78062	0.306845	0.264966	2.84685	0	0.101805	2.29681	23.2417	7.64785	1.08946	0.859204	1.77699	1.70793	1.52111	2.17748
11556	Itga6	NM_008397	4205	9.44714	0.0239004	0.0558901	5.16459	2.69977	13.8754	19.0363	7.0237	9.7418	1.89326	11.5053	0.683604	0.1399	6.00332	0.980574	1.11542	4.5686	17.8896	16.6398	16.4037	15.7001	21.2626	20.7858	18.3965
13425	Med17	NM_144933	3900	9.44161	0.0239607	0.0560026	11.865	11.7204	28.2286	29.4328	16.8936	17.1155	12.4881	10.2427	5.65083	8.79907	8.97109	17.6713	8.51879	34.6659	41.3805	15.5167	21.3513	28.9995	27.8122	29.6484	31.2711
15759	Nrf1	NM_001164226	3587	9.42378	0.0241562	0.0563929	24.4446	50.1286	50.074	53.3859	35.6149	19.064	42.3	20.7881	14.9057	13.995	47.7818	78.4134	24.1905	46.9964	41.871	39.0133	72.4152	50.6894	53.7219	52.3722	56.76
25561	Usp7	NM_001003918	5427	9.40123	0.0244056	0.0568889	90.0975	116.943	151.306	169.919	107.298	86.2483	82.2356	76.715	126.699	61.3899	142.729	91.2819	116.819	119.781	174.011	135.551	175.88	154.305	169.388	175.231	180.754
8194	Fos	NM_010234	2093	9.3824	0.0246159	0.0573502	172.692	120.251	102.856	42.6444	41.1645	25.5762	298.702	303.464	137.891	229.354	151.082	159.996	49.6748	5.27773	7.95938	128.302	269.886	41.6261	46.9901	39.2229	42.7387
13324	Mc1r	NM_008559	3666	9.37697	0.0246768	0.0574244	1.41459	0	1.21735	0.5078	4.38572	3.33887	0	0.121072	0	0.641878	0	0	0	3.66821	0	1.03169	0.169509	0.369026	0.449267	0.869237	0.343669
24402	Tmsb4x	NM_021278	670	9.37362	0.0247145	0.0574832	8975.06	5360.02	5895.63	6499.18	4508.32	4725.86	14079.8	12119.1	8937.43	9479.81	4331.6	5555.92	6192.54	3143.28	3569.95	8632.23	8237.06	5946.07	6841.6	6695.98	6513.07
3500	Camk2a	NM_177407	4956	9.36858	0.0247713	0.0576056	22.5348	8.47743	40.0682	26.2809	34.24	29.5388	14.2683	12.8964	17.4391	26.8264	2.41277	19.0762	3.94332	51.8455	44.8009	30.3989	33.2276	14.5221	29.767	29.3629	31.4718
26673	Zfp160	NM_145483	3795	9.36283	0.0248363	0.0577275	26.9343	58.8258	26.059	35.0641	19.0649	20.0404	8.63799	15.0874	45.3465	53.4284	66.2856	52.6182	57.5736	15.1865	20.9883	30.5631	37.498	46.7704	31.8677	29.3491	32.2691
18839	Pprc1	NM_001081214	5244	9.35844	0.024886	0.057785	30.1283	14.995	38.8796	18.1865	57.4206	37.72	37.5964	27.3387	12.2057	8.48842	8.27649	19.9381	16.7704	35.1688	53.5584	38.7066	28.0848	15.4272	19.8765	18.6063	18.8359
12021	Klf15	NM_023184	2294	9.35656	0.0249073	0.057815	0.37292	0.257412	2.90646	4.52066	0.761819	0	0	0.193484	0	1.28222	0.772235	0	0	7.95571	0.113468	2.47309	1.08356	3.06661	6.25656	4.36578	4.39369
18053	Phf6	NM_027642	4350	9.33731	0.0251266	0.058246	53.8246	63.333	81.579	134.702	48.7725	67.6453	71.5911	73.6691	44.2747	16.9948	42.8623	96.5492	50.5875	47.8618	97.4766	119.407	61.5705	142.811	128.678	132.697	134.62
8042	Fgfr2	NM_010207	5198	9.3368	0.0251325	0.0582497	2.80713	8.64234	25.1329	15.0796	3.53019	6.37369	3.42353	3.33017	0.14747	0.0377248	0.511208	0	25.4158	22.3136	50.3768	15.8864	11.955	14.1583	14.9375	14.3044	16.9181
23514	Tbl1x	NM_020601	2302	9.33412	0.0251631	0.0582916	87.5649	166.034	121.455	125.829	91.3284	72.031	92.7654	92.3565	129.034	47.8734	96.5787	283.008	118.515	101.604	122.685	110.629	150.901	98.6133	134.713	135.462	134.527
23564	Tceal8	NM_001168578	2358	9.32806	0.0252327	0.0584233	82.1943	96.7073	63.6902	139.406	48.9154	50.4563	112.011	76.4222	127.189	78.1713	114.945	73.0685	102.108	39.7173	46.6944	89.2882	79.061	128.285	139.097	136.364	153.88
18958	Prkd2	NM_178900	3625	9.32714	0.0252432	0.0584379	3.7331	1.50085	14.4085	4.95473	10.2205	0.990481	3.10049	7.22406	0.105731	0.757327	0.366519	2.51867	1.61736	12.454	25.4193	3.30398	16.4569	4.10519	5.32237	5.52557	4.86578
15723	Nr2c2	NM_011630	7619	9.31994	0.0253261	0.0585908	60.769	51.5142	88.2778	126.77	70.4642	52.4378	49.418	56.3917	66.0253	69.8772	87.4825	10.3212	56.7389	96.6662	99.5202	86.2107	70.7141	119.393	126.615	126.37	134.704
18648	Pou2f2	NM_001163554	3320	9.31515	0.0253814	0.0586892	76.2617	34.758	73.0228	84.2455	88.0123	60.7592	37.6617	58.5563	121.562	91.0182	37.8846	35.6621	30.7274	60.5405	75.8937	74.0488	81.6081	95.3513	85.6106	76.1005	79.9195
27152	Zmym5	NM_144842	5351	9.31071	0.0254328	0.0587687	42.324	45.6825	47.5564	82.5885	38.3423	33.1227	41.658	42.552	41.6509	56.6183	52.6387	32.474	51.9348	37.4274	47.3311	58.6659	46.801	97.7914	75.8496	78.9204	77.7925
20302	Rnf14	NM_020012	3038	9.29996	0.0255575	0.0590371	296.413	280.88	218.927	336.466	313.742	289.072	306.139	359.552	350.346	159.625	310.364	259.137	273.14	235.868	197.579	232.392	209.867	339.681	330.394	328.262	347.527
26742	Zfp319	NM_024467	4107	9.29539	0.0256108	0.0591306	39.1703	16.2597	56.982	27.5593	51.7433	54.918	23.2612	37.609	15.3515	52.1388	39.6831	1.57767	7.51841	73.7308	57.9282	45.2782	50.9906	23.5851	30.6498	26.4914	29.5109
1550	Ahctf1	NM_026375	8831	9.28785	0.0256988	0.0593042	45.9521	40.2516	55.5621	84.2503	51.6902	48.4567	43.1129	38.8514	42.6848	50.9164	64.6436	18.9767	37.1343	46.6351	45.1857	62.03	68.3977	84.7158	83.5003	83.6129	85.172
27011	Zfp821	NM_029468	2081	9.26109	0.0260136	0.0598313	118.229	90.1845	182.382	102.148	166.951	118.501	150.325	110.27	75.9733	87.3517	93.4276	102.184	74.9419	256.754	210.014	145.702	117.057	67.8699	106.959	117.764	115.999
19285	Ptch1	NM_008957	4305	9.25905	0.0260377	0.0598768	38.5227	18.6019	70.5696	79.6706	39.8237	94.5485	18.0577	47.839	6.5437	24.3238	27.6734	1.98401	26.1483	55	83.5005	102.205	41.5723	58.6391	95.0988	83.6442	81.3002
23908	Ticam1	NM_174989	2828	9.23116	0.0263702	0.0604707	0.384852	11.5176	6.56261	3.36241	2.10109	0	0	0	0	0.20802	0	0	34.5529	13.7561	1.47268	2.45191	8.56979	2.20053	3.16157	4.07798	4.00955
8752	Gli1	NM_010296	3662	9.21602	0.0265524	0.060818	1.12469	0	1.95996	0.424242	0.954458	5.7937	0	0	0	0	0	0	0	2.42629	0.426483	4.64769	0.339388	0.369429	0.321255	0.455812	0.550471
22767	Srebf2	NM_033218	4570	9.21464	0.0265692	0.060828	102.745	55.4949	134.566	51.6785	173.461	197.631	108.109	87.4105	16.7735	33.0828	75.1049	7.73363	83.6462	162	152.476	122.349	101.44	26.8201	66.7763	53.459	59.6587
15228	Nfil3	NM_017373	1992	9.19805	0.0267704	0.0611453	47.3905	17.1535	42.4833	52.6779	31.7588	42.2758	73.5837	43.8949	33.8636	58.9659	22.6774	7.98404	20.7989	47.7381	55.4045	46.2014	20.5892	55.6895	54.0972	50.2004	50.7245
25302	Ube3a	NM_011668	5097	9.1918	0.0268465	0.0612586	123.683	122.059	77.211	111.37	74.6087	89.1427	150.221	70.6226	144.79	212.714	105.137	107.593	153.446	44.9933	44.4808	97.2074	122.163	118.378	110.235	108.01	108.859
13296	Mbd5	NM_029924	7055	9.18527	0.0269263	0.0613776	39.1261	46.356	56.8604	86.3487	46.6938	37.3137	43.4118	29.7579	28.5214	49.0581	84.3694	24.3383	30.3604	37.7139	57.1878	60.4006	72.1393	90.6629	85.2438	85.7337	83.7545
10156	Gsk3a	NM_001031667	2259	9.17143	0.0270964	0.0616559	134.581	95.0063	100.312	81.4113	142.114	188.057	64.2646	90.3814	171.277	151.389	157.428	61.6685	65.9223	144.359	63.8355	73.6681	119.387	71.2656	94.9899	77.1818	82.208
7072	Emb	NM_010330	2622	9.16627	0.02716	0.06175	10.6562	32.5641	13.866	38.7784	15.1966	15.4988	14.467	16.7587	0.146176	1.8697	28.2076	27.7449	41.7397	5.31195	12.31	27.888	9.95409	52.0088	34.0996	32.5827	36.4224
10592	Hira	NM_010435	4533	9.16335	0.0271961	0.061794	38.7135	18.1071	62.9456	36.043	50.4275	53.5733	20.8686	20.0727	29.8046	57.5346	19.5401	2.27405	32.5072	74.3243	83.2628	39.7715	54.4239	26.084	37.1643	39.2331	41.6906
19018	Prnp	NM_011170	2186	9.1629	0.0272017	0.061794	61.2273	92.971	51.4068	97.082	57.0812	30.0128	78.4075	82.0292	46.8134	73.0193	72.3271	81.7818	124.804	33.7246	37.0321	68.9191	65.9512	96.7911	93.7491	96.6968	101.091
2834	Baz2a	NM_054078	8369	9.1524	0.0273318	0.0620488	24.3844	20.3387	44.8648	41.5581	31.9912	35.3359	21.7672	14.0013	17.9524	25.2586	31.3808	7.91822	21.7172	49.1235	40.3088	49.4108	40.6161	36.5652	42.4805	43.8605	43.3261
14258	Mms19	NM_028152	3965	9.1429	0.0274501	0.0622464	29.4835	27.4458	63.9882	38.8159	23.2721	34.4108	40.6295	31.7916	29.2893	17.5075	28.8177	8.76511	44.7545	80.1869	43.722	60.8902	71.1537	36.3716	38.9871	40.5671	39.3378
19797	Rbbp7	NM_009031	2272	9.14252	0.0274548	0.0622464	80.4859	93.4345	55.5671	101.612	82.6886	53.4436	82.0354	104.711	88.2272	71.8089	80.8952	68.8342	130.574	35.4075	63.6994	63.5358	59.6256	94.6755	98.8995	109.066	103.808
26685	Zfp191	NM_021559	3128	9.14281	0.0274511	0.0622464	45.949	37.9784	70.6711	94.8491	55.3113	38.8184	41.1711	59.3126	23.2807	57.8	25.91	38.7926	49.2326	77.3843	67.4042	85.6473	52.2485	90.5647	90.7151	96.0527	102.064
22205	Smyd1	NM_001160127	3360	9.13678	0.0275265	0.0623682	1.09033	0	0.502464	1.12501	5.40928	0.194291	0.557503	0.264197	0	0.116722	0	0	0	0.142939	0.387346	0	1.47957	2.01317	0.910339	0.451619	1.1249
24665	Tram1	NM_028173	2888	9.12995	0.0276121	0.0625244	28.912	13.3258	50.4049	41.697	20.2113	24.2433	35.9983	41.1884	34.0408	17.7897	27.1431	9.58626	3.24816	24.945	66.2459	48.6743	61.7546	44.5953	41.1427	41.3513	39.6987
27123	Zkscan16	NM_001099323	2794	9.1075	0.0278953	0.0630829	1.17122	0.882799	4.94216	5.74737	0.187646	2.74538	1.00566	1.42973	1.09742	0.561471	1.10957	0	1.53883	7.04768	2.14274	8.79893	1.7793	3.97042	6.31588	6.30003	6.40316
11494	Irf4	NM_013674	4683	9.10454	0.0279328	0.0631544	0.209777	0	0.655577	1.0217	0.0373182	0.97581	0	0	0.245531	0	0	0	0	0.205114	0	2.0191	0.398091	0.519993	1.35656	1.13411	1.07614
18159	Pih1d1	NM_029406	1101	9.10388	0.0279412	0.0631631	68.2733	54.3153	109.408	39.0855	66.349	64.4812	74.8604	52.8106	72.0597	79.0786	42.2362	96.5691	24.1404	38.1689	179.442	112.217	107.803	32.1931	39.7488	36.1098	48.2901
10200	Gtf2e1	NM_028812	3058	9.10271	0.027956	0.0631863	26.4715	9.05284	21.1476	28.7567	20.0021	24.4966	32.9251	31.3512	23.2496	26.8042	5.21372	5.20085	16.7439	11.6221	30.6432	18.3461	23.9789	32.9143	27.9298	26.0019	28.1807
25525	Usp22	NM_001004143	4442	9.08683	0.0281585	0.0635919	471.274	321.904	540.691	423.265	536.992	530.028	466.089	536.079	375.94	382.519	448.859	222.781	294.071	548.606	554.698	474.973	584.487	392.271	422.691	429.167	448.931
3025	Bend5	NR_033793	1907	9.07494	0.0283109	0.0638842	82.7519	94.8261	55.2361	103.986	78.1706	86.6086	79.3192	71.4538	75.9714	104.988	71.7613	113.515	99.2015	40.9253	29.8925	62.1439	87.9828	115.208	98.7048	100.818	101.214
24732	Trim13	NM_023233	1575	9.05182	0.0286097	0.0644317	20.8977	50.4655	32.8553	57.1126	20.0837	20.3099	29.4362	28.4628	23.4831	3.61061	33.743	71.2464	46.4071	23.48	29.0871	51.6298	27.2241	61.5009	54.5269	56.7474	55.6751
25257	Ube2b	NM_009458	2124	9.05065	0.028625	0.0644317	134.984	173.527	145.202	269.925	119.058	80.1422	193.362	167.385	157.081	92.8767	194.749	162.237	163.595	117.355	68.0154	218.431	177.005	312.862	245.036	252.978	268.824
11474	Irak1	NM_001177973	3954	9.04569	0.0286895	0.064549	10.9545	21.8495	34.309	29.561	11.359	9.45214	12.436	10.6641	2.37486	19.4407	34.3862	5.06513	26.097	20.3454	38.0505	29.3341	49.5061	42.8368	28.2059	25.5977	21.6036
27050	Zfp933	NM_198619	4247	9.03727	0.0287995	0.0647334	9.5517	11.1032	10.3907	28.7127	4.40298	4.76509	10.4753	7.00213	17.5979	13.0668	9.59375	13.5923	10.1236	5.31501	4.22898	18.8501	13.1688	27.0761	32.5757	28.4408	26.7582
26927	Zfp677	NM_172486	2912	9.02024	0.029023	0.0651405	4.79959	2.14776	3.79635	15.1909	4.86115	8.46286	9.64909	1.98148	2.69819	1.14478	3.65008	1.7194	1.0738	0.164929	1.87714	8.87532	4.26799	14.2161	18.5838	13.3401	14.6237
20850	Sbno1	NM_001081203	10071	9.00665	0.0292027	0.0654908	86.3783	65.3351	96.5658	147.217	101.619	90.4097	42.4081	86.029	78.8164	118.988	77.7486	39.6264	78.6304	98.8588	103.798	76.55	107.056	157.57	150.597	148.369	132.332
2831	Bax	NM_007527	869	9.0005	0.0292842	0.0656403	162.197	78.0155	118.181	81.1505	100.151	87.1424	146.041	208.901	50.9415	380.002	107.534	50.4992	76.0135	154.472	64.4002	100.104	153.746	59.4693	80.6855	87.3095	97.1377
18277	Pkn2	NM_178654	6207	8.9915	0.0294041	0.0658573	19.7693	24.2755	33.9753	50.0051	13.8525	20.2461	15.9949	13.086	15.2828	40.1539	22.9751	12.1947	37.6568	28.0875	31.5359	34.5294	41.7483	52.3528	50.037	50.2146	47.4159
6449	Dnmt3b	NM_001003961	4319	8.97068	0.0296832	0.0663535	12.9439	4.77846	6.93897	4.49424	3.03475	4.79901	13.5536	11.4072	22.9396	21.9294	2.461	4.09154	7.78286	17.2916	2.77232	4.67045	3.02149	3.5082	5.01191	4.67283	4.78402
24656	Traf6	NM_009424	5474	8.96695	0.0297336	0.0664125	24.6731	57.4236	41.2942	49.0889	25.764	34.1673	29.1727	23.1899	9.52233	26.2222	42.5563	116.862	12.8526	30.2255	60.7708	35.5832	38.5975	55.6066	47.8828	45.5453	47.3207
2264	Arid3b	NM_019689	3787	8.93384	0.0301835	0.0671575	25.8502	10.478	25.4151	21.182	19.8897	33.6148	22.5062	32.1139	32.8925	14.0844	10.993	6.61062	13.8304	29.0422	23.5071	26.4663	22.6448	18.4333	23.5474	22.7195	20.0278
3095	Bmi1	NM_007552	3594	8.91947	0.0303809	0.0675099	26.206	25.6161	46.4495	65.2613	31.9472	37.3726	22.4118	37.6668	20.6354	7.2021	32.4086	8.76848	35.6713	39.5551	30.7808	58.2306	57.2315	69.9385	71.6861	59.4056	60.0148
15912	Nufip1	NM_013745	3974	8.91665	0.0304198	0.0675718	16.4331	9.73946	32.1007	22.1377	29.2881	11.2116	14.7302	19.5455	15.2866	8.53654	10.6986	6.22544	12.2944	40.3048	48.4044	20.3036	19.39	24.3744	20.9	22.7959	20.4803
14192	Mkx	NM_177595	3201	8.91153	0.0304906	0.0676669	3.20217	6.75338	0.650263	1.15176	1.85626	10.503	2.04818	3.18918	1.61643	0	0	17.5738	2.68634	0.375097	0.650538	1.57542	0	0.929792	1.24957	0.853293	1.57437
4213	Cdk13	NM_001081058	7081	8.91097	0.0304982	0.0676724	48.7389	43.2116	57.365	94.35	45.0663	51.19	60.6459	45.6325	43.7347	46.1641	83.184	17.9683	28.4825	50.3945	52.4563	66.1433	60.4658	98.8891	95.3976	90.9478	92.1654
20814	Sap30l	NM_001081168	1549	8.91064	0.0305029	0.0676724	18.2835	49.1877	24.6623	25.8064	8.23601	12.3272	26.6047	26.3617	17.8152	18.3561	29.4489	72.4423	45.6721	9.45665	18.4846	35.4046	35.3034	24.105	29.4679	28.0173	21.6353
17900	Pex1	NM_027777	4304	8.90445	0.0305887	0.0678192	13.2425	16.7321	35.0099	28.0452	14.7394	17.1016	23.611	14.2313	4.94231	4.82944	25.1073	14.9177	10.1711	30.1287	47.5961	36.615	25.7	24.5801	29.5203	29.686	28.3944
25411	Uhrf2	NM_144873	3538	8.89308	0.0307467	0.0680982	45.2391	85.4194	68.1519	120.222	37.3924	17.2061	42.0916	63.2281	97.6601	13.8562	60.085	64.2655	131.908	63.8691	45.7616	85.3433	77.6335	140.409	104.21	117.046	119.223
27105	Zglp1	NM_001103168	1010	8.88664	0.0308367	0.0682489	4.32513	0	3.01073	2.29323	5.0179	16.3204	4.17299	0.439457	0	0	0	0	0	5.2307	0	3.12062	3.6916	2.14313	2.32958	2.70435	1.99587
6741	E2f6	NR_027677	2487	8.8717	0.0310463	0.0686579	31.5013	48.8539	34.5349	81.6581	48.2052	20.9337	61.7625	32.1243	11.7895	14.1925	60.0118	57.3176	29.2322	30.8982	13.9202	61.3382	31.983	87.7964	78.9968	82.7361	77.103
23512	Tbk1	NM_019786	3027	8.86098	0.0311975	0.0689567	31.3113	36.3386	46.0581	84.3945	17.9553	31.0018	22.1233	23.1677	58.0545	35.565	16.094	38.0437	54.8782	30.2254	53.2288	56.435	44.3431	87.8658	71.3558	85.8729	92.4835
17541	Paxip1	NM_018878	5054	8.83527	0.0315632	0.0696119	45.0688	68.2246	70.2812	44.1023	41.9787	58.5133	42.0676	26.61	59.4173	41.8261	100.335	60.2565	44.0822	96.3113	86.8342	42.1573	55.822	36.1366	47.0668	44.1961	49.0096
24471	Tnip1	NM_021327	2836	8.79595	0.0321305	0.0706574	14.3219	4.42716	19.5593	15.2281	18.117	18.2425	9.24716	11.2684	8.2439	20.8125	7.33963	3.32324	2.61861	20.2372	10.6468	17.115	30.2383	11.1624	15.5144	17.4431	16.7926
26891	Zfp612	NM_175480	4902	8.79414	0.0321568	0.070696	31.3559	36.3361	19.7352	51.3432	19.2872	18.7775	28.9465	18.3806	59.5005	43.243	48.8772	40.6756	19.4554	17.4396	7.85881	28.1619	25.4805	63.7511	47.6623	46.1547	47.8049
11544	Itch	NM_008395	5186	8.77924	0.0323747	0.0710847	48.5594	48.7209	60.9748	110.016	36.5294	23.9803	49.5754	46.3878	71.2079	63.6756	56.1068	30.2133	59.8428	22.7357	73.381	87.0306	60.752	104.398	113.334	109.755	112.579
19933	Rcor3	NM_144814	1594	8.74323	0.0329069	0.071968	47.5774	25.633	79.8114	35.4711	70.2773	89.0763	19.0964	34.528	46.4064	26.0802	26.6726	17.3683	32.8579	61.9173	167.87	40.337	49.121	31.2326	37.9353	34.4613	38.2551
8123	Flna	NM_010227	8347	8.73192	0.0330759	0.0722234	49.6153	43.5576	85.0722	70.8763	56.2578	75.5311	48.5863	40.1471	43.5987	33.5711	39.3161	44.6706	46.6862	67.3776	101.412	81.8635	89.6357	53.3554	77.8278	75.6447	76.6771
5410	Ctdp1	NM_026295	3685	8.72878	0.0331229	0.0723139	22.5417	38.4222	25.3626	17.1436	24.4239	25.5989	11.3104	15.056	18.0456	40.8151	20.6716	52.9101	41.6849	18.833	45.4195	18.8168	18.3812	11.3074	21.3898	16.3892	19.4881
15226	Nfic	NM_008688	6295	8.72846	0.0331278	0.0723139	20.6824	11.7328	19.0462	10.5215	27.984	27.4038	18.0775	19.5309	22.345	8.75335	10.4124	5.84834	18.9377	38.3761	10.4615	14.1194	13.228	8.2095	11.3626	11.426	11.0878
2497	Atf4	NM_009716	1725	8.71331	0.0333557	0.0727541	349.945	410.248	472.25	278.47	291.471	478.07	264.15	399.337	277.068	389.573	395.38	593.143	242.221	550.575	692.012	263.474	382.939	302.254	244.153	287.742	279.732
26824	Zfp467	NM_020589	3619	8.71131	0.033386	0.0727972	4.32131	9.07749	21.3826	13.8378	1.01409	11.2741	3.36443	1.83967	7.73114	0.704398	21.6605	2.11594	3.45609	35.8314	11.7238	26.1273	11.848	13.7565	14.1081	14.6754	12.8113
5294	Crtc3	NM_173863	5110	8.69878	0.0335758	0.0731363	8.19614	16.5426	20.8455	8.12929	12.0384	4.37553	8.0647	3.2138	18.3761	3.10833	9.96689	12.5071	27.1538	20.3482	41.3113	13.9396	7.78295	6.30093	9.16286	8.5226	8.53076
22225	Snapc4	NR_033572	4482	8.6986	0.0335785	0.0731363	36.3283	27.4753	32.1426	18.6805	24.6038	30.842	15.7773	19.5089	48.5292	78.7087	22.2328	27.6649	32.5282	42.0588	22.3593	36.1454	28.0069	14.5487	20.001	20.72	19.4521
20362	Rnf41	NM_001164237	4376	8.69614	0.0336159	0.0731832	42.916	45.1706	35.9922	28.9166	53.7543	32.8944	45.0538	21.5028	53.2957	50.9951	50.7041	33.1809	51.6267	38.029	19.3914	34.7161	51.8323	27.5763	27.4753	29.4056	31.2093
24518	Tnrc18	NM_178242	6207	8.69528	0.0336291	0.0732005	80.3966	46.6951	86.3835	51.0158	100.29	77.4083	54.7749	62.2121	71.8137	115.881	49.7318	7.92416	82.4293	64.3383	125.472	80.6363	75.087	40.0602	57.1256	52.1948	54.6825
6935	Eid3	NM_025499	1304	8.68944	0.0337181	0.0733426	3.23084	1.03902	8.12872	12.9301	2.27833	7.5094	3.59128	3.06339	2.79226	0.150379	1.01889	0	2.09819	2.76231	1.99614	8.21794	19.5385	17.0143	8.30002	13.266	13.14
3694	Ccdc101	NM_029339	1165	8.68647	0.0337634	0.0733929	52.077	94.6436	42.6483	49.6519	53.7035	78.7303	41.0016	54.8623	36.0245	48.1397	29.2717	199.972	54.6872	45.3477	52.5062	51.4031	21.3363	46.4497	49.885	50.1471	52.1259
14709	Murc	NM_026509	2044	8.6739	0.033956	0.0737036	5.86844	20.5876	23.6558	18.5291	4.53148	4.07212	6.64422	8.68593	10.1256	1.15123	6.28348	5.18728	50.292	21.0296	40.6236	9.56032	23.4096	15.2228	17.4969	20.1929	21.2036
10738	Hnf1a	NM_009327	3186	8.63659	0.0345339	0.074677	0.441022	0.286256	3.87666	0.479611	0.274264	0.461029	1.91084	0	0	0	0	0	0.858768	11.2305	2.69611	1.38498	0.195047	0.339698	0.295402	0.57154	0.711802
14731	Mxd1	NM_010751	4661	8.63594	0.0345441	0.0746874	30.6479	55.4782	53.9212	36.8654	26.2461	28.327	40.8923	25.4255	42.7185	20.2783	52.2596	94.7198	19.4551	45.441	48.0273	62.8877	59.3288	42.028	32.4587	36.2675	36.7074
20851	Sbno2	NM_183426	4640	8.63431	0.0345695	0.0747189	6.47142	3.90812	18.9697	5.84986	7.19384	15.1949	4.03709	4.01762	6.52557	1.85951	6.58588	0	5.13849	36.2275	15.4271	8.28712	15.9373	4.19849	6.89636	5.62499	6.67959
26470	Yy1	NM_009537	2324	8.63076	0.0346251	0.0748158	52.7524	24.3009	53.7069	104.838	55.4213	39.2561	33.0472	74.2935	76.3579	38.1387	40.019	0.760385	32.1234	62.1008	46.3695	70.7939	35.5632	110.486	100.939	103.948	103.979
4938	Cnot7	NM_011135	2982	8.60912	0.0349657	0.0754321	75.6693	65.8479	86.7017	156.668	59.4845	62.8298	75.2237	70.2541	34.1888	152.035	60.8918	64.6922	71.9595	68.9326	71.3154	105.906	100.652	158.15	148.889	157.901	161.732
26944	Zfp704	NM_133218	13844	8.60597	0.0350154	0.0754942	27.9383	29.497	54.2033	40.7615	33.1622	26.7134	17.5901	22.9877	40.4481	26.7284	29.9431	14.8708	43.677	61.7862	64.4161	36.791	53.8199	35.8636	42.0302	42.5067	42.6455
26952	Zfp710	NM_001146000	4547	8.60112	0.0350923	0.0756246	24.1046	27.1854	53.1684	21.5052	33.6301	40.5588	21.7312	22.5489	4.5096	21.6492	43.7325	9.45685	28.367	56.1393	94.3983	35.2128	26.9232	14.7573	25.7176	22.4929	23.0532
26503	Zbtb24	NM_153398	2831	8.59419	0.0352024	0.0757558	9.49071	30.0274	21.837	17.3459	7.40776	1.32593	22.4971	10.0341	7.85231	7.82712	24.7172	27.6732	37.6918	17.7282	41.5592	12.9146	15.1459	14.2405	19.1156	18.7603	17.2673
22480	Sox18	NM_009236	1619	8.58615	0.0353306	0.0759608	1.00774	0	5.46068	2.78779	0	0	0.289254	5.75718	0	0	0	0	0	19.1338	0	1.55742	1.15149	2.84106	3.19724	2.15572	2.95712
26354	Wwp1	NM_177327	5070	8.58398	0.0353654	0.0760238	53.4748	36.7055	36.6905	71.33	32.4704	40.9137	43.6898	49.2876	72.7238	81.7637	40.8809	21.9004	47.3352	24.3452	31.2664	31.7047	59.4455	79.0362	70.6327	70.5444	65.1067
22204	Smurf2	NM_025481	5329	8.58244	0.0353899	0.0760647	101.841	78.1271	123.24	160.785	101.958	110.804	92.7115	91.2023	115.903	98.47	84.1873	62.6185	87.5754	106.032	157.966	110.719	118.243	151.913	162.48	161.739	167.008
26835	Zfp513	NM_001177901	2214	8.56283	0.0357051	0.0765519	11.0995	16.8441	31.0194	9.73685	14.1293	5.82346	10.999	8.41994	25.1881	2.03711	8.80152	14.3669	27.3639	24.838	39.6206	27.9023	31.7165	7.94355	10.0959	9.52683	11.3811
23337	Taf1a	NM_021466	2388	8.52623	0.0363005	0.0776002	6.80767	32.8216	21.3742	14.1472	3.29324	6.42429	11.1781	5.94776	8.74725	5.25544	79.1911	0.123334	19.1503	20.4136	25.9425	25.8692	13.2715	12.5767	14.0897	16.5215	13.4008
20572	Rps6ka3	NM_148945	2223	8.49142	0.0368758	0.0785753	28.7424	48.3193	47.7756	76.527	39.8578	39.7916	24.6475	17.5704	24.7413	25.8459	36.2589	17.621	91.0781	57.7927	41.5678	43.1018	48.6401	72.6631	74.1955	78.0904	81.1589
6394	Dnajc17	NM_139139	1001	8.47069	0.0372226	0.0791755	8.64408	34.2557	18.2065	12.2418	21.4742	7.33685	10.7602	3.10386	0.765782	8.4236	31.8553	50.6073	20.3045	19.1918	19.7628	24.5596	9.31198	9.73077	9.63715	12.7338	16.8657
26817	Zfp458	NM_001001152	3488	8.46634	0.0372958	0.0793115	26.2632	51.8828	24.8982	40.1652	20.793	15.394	13.1576	26.9772	37.7999	43.4577	28.0607	85.7898	41.7981	11.2908	29.1043	28.5543	30.6434	49.8785	38.1128	37.849	34.8203
19339	Ptp4a3	NM_001166388	3808	8.45909	0.037418	0.079547	14.991	4.60498	15.6761	5.60726	19.1834	25.0721	19.9225	11.8889	7.6997	6.17942	3.14014	0	10.6748	19.3598	22.6256	11.091	9.62809	3.76581	8.27955	5.81791	4.56578
10350	H2afy	NM_001159513	1958	8.44103	0.0377242	0.0800751	121.584	217.83	189.649	212.687	74.6172	97.9392	132.024	160.04	172.943	91.9377	144.308	211.942	297.239	152.079	248.864	177.069	180.586	237.543	205.847	210.333	197.027
13432	Med23	NM_001166416	4946	8.43705	0.0377921	0.0801654	22.936	34.5779	45.3106	50.8951	27.4544	30.0275	18.6526	25.3065	21.4265	14.7487	35.6379	11.6713	56.4245	43.5024	36.7868	57.6071	43.3461	47.5384	53.8031	52.9232	49.3155
15799	Nsd1	NM_008739	12784	8.43384	0.037847	0.0802549	123.954	93.1281	170.773	201.307	145.753	142.382	107.551	83.3263	156.679	108.032	96.758	42.1372	140.489	164.305	182.008	165.579	171.201	184.98	205.674	210.274	204.298
22424	Snx6	NM_026998	1879	8.43335	0.0378553	0.0802549	137.935	71.2023	121.214	151.659	136.721	98.2352	160.504	182.359	82.8149	166.977	94.7506	39.1861	79.6702	91.2495	105.005	154.991	133.61	156.956	153.895	148.675	147.11
26123	Vwc2	NM_177033	3578	8.40548	0.0383345	0.0810473	7.59513	5.23091	1.43685	4.94678	2.10026	8.6209	0.65442	14.5139	9.15872	10.5226	1.48533	13.0057	1.20164	1.00672	0.363746	2.46649	1.91046	5.29342	4.80044	4.62272	5.07055
1910	Ankrd42	NM_028665	2782	8.39401	0.0385333	0.081418	32.4533	17.8618	15.5412	29.0095	23.6198	33.0867	12.625	29.1965	61.5828	34.6089	23.4015	17.6798	12.5042	8.28653	15.6253	19.713	18.5398	30.9278	28.7555	29.4542	26.9006
10678	Hlf	NM_172563	5665	8.36681	0.0390091	0.0821599	3.43922	0.912073	9.38638	7.0475	3.36257	1.20999	7.60527	6.42468	0.405939	1.6269	2.73622	0	0	10.555	13.1871	6.45386	7.34953	7.45081	4.77636	8.22337	7.73948
26708	Zfp26	NM_011753	11407	8.36465	0.0390471	0.082215	19.7586	20.3602	36.355	42.4442	16.0866	18.3707	37.8928	10.8949	20.8151	14.4917	19.296	6.97125	34.8134	35.4721	32.8366	40.2301	36.881	47.1309	42.1195	40.9856	39.5407
14808	Mynn	NM_030557	4154	8.34319	0.0394267	0.082875	23.0986	30.6281	50.2967	64.7355	34.9607	16.344	20.2924	36.5424	26.2036	4.24854	37.2085	31.9054	22.7705	22.95	27.0072	51.8981	99.3314	67.1539	58.6803	65.3514	67.7562
5055	Commd10	NM_178377	1549	8.33046	0.0396536	0.0832642	28.4435	9.03279	22.7639	39.0186	26.8516	15.5934	60.4652	32.9522	16.9492	17.8497	6.57596	4.37315	16.1492	23.2541	22.5176	24.8239	20.4599	37.7295	39.0374	41.2422	38.0651
8761	Glis3	NM_175459	3917	8.32898	0.0396801	0.0832819	3.07656	0.0997861	6.97069	3.28928	0	0.624984	0.836895	0.226628	0	16.7708	0	0	0.299358	8.27635	11.0977	7.08094	1.42782	1.31244	3.72423	4.06768	4.05275
26820	Zfp462	NM_172867	10496	8.32839	0.0396907	0.0832914	149.416	150.623	212.266	275.006	220.982	183.294	155.268	122.888	110.261	103.801	159.074	102.168	190.627	170.31	240.928	242.092	195.733	254.767	282.789	283.146	279.322
22208	Smyd3	NM_027188	3761	8.30944	0.0400312	0.0838916	50.1925	30.1581	34.7168	28.5951	30.3428	42.7863	47.5649	49.3299	100.786	30.3447	18.9586	31.0889	40.4269	50.0578	38.2036	14.9169	35.6891	28.8483	26.5879	29.1303	29.8139
11184	Ighmbp2	NM_009212	5562	8.30684	0.0400781	0.0839742	10.9161	4.85972	7.97229	3.49083	1.94808	5.92723	10.272	10.4539	34.1101	2.78522	4.85715	1.42972	8.29229	9.3257	10.9978	4.08003	7.48564	3.21064	3.55343	3.8468	3.35246
27048	Zfp931	NM_001162922	1779	8.30659	0.0400827	0.0839742	4.40501	1.45614	0.638728	6.84599	6.8765	1.10087	7.63394	0.249495	10.0181	0.551134	3.98315	0.165555	0.219709	0	0.438949	1.41735	0.698617	7.30036	6.3484	6.65319	7.08201
5984	Ddx1	NM_134040	2469	8.29963	0.0402086	0.0841869	151.387	186.679	175.271	271.837	173.346	146.613	152.687	148.67	151.431	135.574	177.761	229.033	153.242	171.665	213.488	163.91	152.02	280.213	255.3	276.384	275.451
26743	Zfp322a	NM_001111107	4912	8.29785	0.0402409	0.0842419	26.7621	18.4555	23.5466	57.4624	14.9429	13.0909	37.3727	51.867	31.5624	11.7369	27.77	9.5336	18.0631	6.11097	11.1813	42.8627	34.0313	65.4391	54.9898	53.3513	56.0692
27195	Zscan12	NM_016684	4418	8.29305	0.040328	0.084386	10.1287	6.1939	15.1398	24.0837	14.8733	14.0375	7.31392	12.2566	2.08207	10.2086	3.2078	5.19981	10.1741	16.9042	11.5478	12.5559	19.5512	26.2118	25.0838	23.081	21.9582
15728	Nr2f1	NM_010151	2430	8.28007	0.0405646	0.0847105	251.799	429.933	208.644	407.62	131.251	101.079	320.681	299.371	370.971	287.443	420.824	479.72	389.254	59.886	80.3385	237.878	456.475	564.856	342.377	383.231	340.015
5403	Ctbp2	NM_009980	3047	8.2783	0.040597	0.0847566	31.4348	35.5475	56.7738	67.0366	31.1439	35.3511	37.04	28.4053	34.4657	22.2029	36.0464	36.7307	33.8653	78.1016	47.583	61.0297	40.3811	61.8039	67.4898	68.7255	70.1271
11926	Khdrbs2	NM_133235	1359	8.27075	0.0407353	0.085007	20.0346	27.3183	53.9243	57.1833	32.7919	41.7918	12.75	14.0439	9.30687	9.52331	34.2178	14.0868	33.6504	50.1831	31.9864	64.9382	68.5894	48.7782	60.4234	54.266	65.2658
11044	Ice2	NM_145618	4029	8.25918	0.0409482	0.085297	8.24386	18.5364	11.2707	28.2179	4.42434	2.91653	20.6895	4.84722	4.66131	11.9243	10.5525	35.1614	9.89525	3.33772	4.97465	26.1283	10.6423	29.4813	28.0313	26.59	28.7689
23680	Tec	NM_001113460	2656	8.24332	0.0412418	0.0857667	1.00189	0.110889	6.3268	3.80411	0	0	5.6422	0	0	0.369152	0	0.332668	0	7.05221	9.31031	3.79738	5.1473	2.95426	2.83479	4.3992	5.02817
6207	Dhx36	NM_028136	4975	8.24154	0.0412749	0.0858096	71.5494	65.6419	91.6752	135.417	66.8133	46.0252	84.2474	64.5034	66.4085	101.299	63.3826	46.65	86.8932	60.1428	95.4334	107.7	103.424	137.324	138.902	129.905	135.536
10679	Hltf	NM_009210	4955	8.22232	0.0416337	0.0864311	11.0099	13.2399	20.5664	40.0086	11.7095	6.81802	8.31698	20.7817	12.2988	6.13411	22.3449	0.178318	17.1964	24.4256	11.3995	20.3549	26.0858	37.4593	41.7867	39.5973	41.1912
26901	Zfp629	NM_177226	6116	8.21719	0.0417299	0.0866126	50.4489	25.2546	42.6196	43.5174	37.2325	40.5075	39.1273	34.3266	71.5035	79.9957	23.2445	14.3023	38.2171	27.0134	45.071	45.7622	52.6317	37.6037	47.3576	45.2304	43.8778
10695	Hmga1	NM_001166537	1971	8.21652	0.0417426	0.0866258	16.2128	9.885	29.3176	5.14321	42.5598	20.7835	10.4542	12.8359	0.0972283	10.5459	17.751	1.19542	10.7086	35.454	47.1466	21.4279	13.2418	2.47095	7.40123	3.54146	7.15919
23696	Tefm	NM_183275	1287	8.2156	0.0417599	0.0866487	7.78019	4.74372	23.3908	31.8659	3.66632	3.17024	8.73292	25.8655	3.72255	1.52365	9.97935	0	4.2518	11.755	7.88778	37.2243	36.6961	32.3758	34.3699	27.8256	32.8922
26481	Zbed3	NM_028106	1894	8.21008	0.0418638	0.0867864	66.2012	52.9966	114.288	43.1437	81.6599	112.881	72.9405	65.1482	45.7338	18.8432	101.483	7.15313	50.354	120.576	172.89	66.8972	96.7892	38.4283	44.1009	44.5457	45.4997
26233	Wdr75	NM_028599	2612	8.20923	0.0418798	0.0868065	49.9638	69.5305	41.4072	73.4893	42.9544	74.854	40.34	42.8218	47.7625	51.0504	58.4963	57.168	92.927	34.2921	40.6589	35.9588	54.7192	68.8854	75.937	76.9757	72.1591
20825	Sars	NM_011319	1866	8.1758	0.0425149	0.0878598	180.274	150.555	179.355	127.613	212.879	185.682	229.885	174.353	137.925	140.923	112.499	132.425	206.742	206.806	195.292	160.8	154.522	75.1099	136.81	152.964	145.569
27112	Zhx3	NM_177263	4480	8.15508	0.042913	0.0884977	38.8392	18.4	48.1462	54.5138	47.1231	40.9832	16.6206	54.7879	49.5775	23.9427	32.2272	15.1206	7.85214	59.4982	54.8482	39.5385	38.7	44.1487	58.9794	57.1072	57.8199
26941	Zfp7	NM_145916	2754	8.14926	0.0430257	0.088664	8.49412	2.27785	10.8075	16.8842	6.21881	7.05203	18.1948	11.2816	4.87095	3.34655	2.89462	0.106944	3.83198	3.22624	7.18321	23.1179	9.70263	15.8176	17.087	17.7971	16.8351
8231	Foxn3	NM_183186	2611	8.14442	0.0431194	0.088778	81.3817	59.6328	148.419	150.603	119.14	92.697	50.3995	97.0659	59.8177	69.1698	120.939	45.6843	12.2753	179.16	142.66	121.679	150.178	158.549	154.906	146.804	142.154
18899	Preb	NM_016703	5486	8.13874	0.0432297	0.0889307	23.8172	40.235	37.855	25.5557	39.3101	34.6281	19.1214	18.2848	10.8988	20.6602	19.8592	52.3977	48.4481	36.0687	40.8523	37.4588	37.0405	22.1447	27.2772	27.0793	25.7214
1267	Acvr2a	NM_007396	5681	8.13591	0.0432847	0.0890256	117.441	156.602	142.383	201.32	133.632	107.156	117.055	118.678	87.6045	140.521	184.603	103.635	181.568	135.391	118.671	161.891	153.577	226.181	193.664	192.184	193.253
8529	Gatad2a	NM_001113345	5205	8.12139	0.0435684	0.0894689	51.9078	24.0921	50.3469	33.6596	54.9298	54.4014	64.7796	45.2805	39.7265	52.3293	47.3082	7.92183	17.0462	46.1358	99.8679	41.1765	14.2073	26.6671	33.7675	36.8792	37.3247
27067	Zfp948	NM_001002008	2597	8.11304	0.0437323	0.0896931	47.2866	39.6989	19.3528	48.0271	21.8031	38.0202	52.8351	24.7818	119.247	27.0318	18.9293	73.8291	26.3384	8.50697	13.1301	35.1955	20.5784	55.8434	51.9136	41.3688	42.9828
12326	L3mbtl4	NM_177278	4570	8.10039	0.0439819	0.0901516	5.65781	4.34258	2.18036	0.848141	1.98853	4.78542	9.53001	3.69067	7.08679	6.86542	0.290729	12.3094	0.427639	6.93612	0	1.24142	0.543912	0.592056	1.13268	0.730496	0.937336
23345	Taf3	NM_027748	4804	8.0963	0.0440628	0.0902639	17.9621	27.9467	22.2857	50.9662	21.0267	21.3008	6.33632	6.65223	26.1287	26.3281	13.8284	39.1757	30.8361	28.4425	6.33945	20.4698	33.8909	60.3206	48.8305	47.6648	47.0492
22111	Smarcd3	NM_025891	1725	8.08747	0.0442382	0.0905027	42.9123	81.0025	78.7328	47.8052	27.05	53.0768	66.5126	44.5138	27.3291	38.9914	94.9938	47.6358	100.378	105.103	30.3302	82.9523	96.5452	31.3704	51.5587	53.6602	54.6317
13431	Med22	NM_011513	3466	8.07485	0.0444899	0.0907604	34.6259	47.3046	37.664	24.9553	31.0093	22.0839	31.6165	36.1125	25.3783	61.5551	29.3888	74.1829	38.3419	43.5101	23.1308	45.4677	38.5474	30.7572	22.1303	23.3789	23.5548
24560	Topors	NM_134097	3842	8.07552	0.0444765	0.0907604	43.3547	34.7709	51.0521	95.5925	32.5233	26.8042	25.3532	32.6939	41.8489	100.905	25.2447	42.5455	36.5225	40.002	50.3385	45.612	68.2559	103.594	90.514	94.6721	93.5899
6445	Dnmt1	NM_010066	5258	8.04866	0.0450167	0.0916485	86.64	87.1239	158.21	114.195	106.259	97.4321	67.5111	67.4472	55.5084	125.682	111.856	64.9204	84.5951	136.373	220.445	104.182	171.842	102.094	118.36	120.114	116.213
27187	Zpr1	NM_011752	2983	8.03546	0.0452844	0.0920852	51.4411	29.4785	49.2978	31.5513	35.2686	36.0001	44.1143	46.4236	40.2804	106.56	36.6713	29.6201	22.1441	50.4746	29.3194	51.9845	65.4126	26.1227	33.6012	32.8617	33.6196
18894	Prdx2	NM_011563	942	8.03167	0.0453617	0.0922152	781.357	895.77	642.459	734.743	776.593	493.251	903.297	951.312	853.008	710.683	652.561	653.452	1381.3	536.357	530.817	830.448	672.215	446.641	793.533	832.658	866.141
22950	Stat5a	NM_001164062	3605	8.02047	0.0455904	0.0926123	1.51386	0	0.814616	0.71618	0.436297	8.64688	0	0	0	0	0	0	0	0.266449	0.216613	1.22401	1.55139	0.675486	0.522136	0.96813	0.698968
9877	Gpbp1l1	NM_029868	3519	7.99749	0.0460636	0.0934509	9.65171	12.0422	23.2097	26.947	11.8693	14.841	8.78317	13.4959	4.57445	4.34649	9.69068	6.10973	20.3262	14.1257	41.2747	12.5392	24.8992	23.6047	27.614	27.6408	28.9284
23776	Tfcp2l1	NM_023755	9270	7.99665	0.0460809	0.0934715	0.287527	0.0265156	1.05281	0.47075	0.584423	0.422535	0	0.718206	0	0	0.0477753	0.0317716	0	2.12419	0.196556	0.952007	0.938498	0.262689	0.710685	0.474711	0.434913
9132	Gm14420	NM_001177568	4662	7.97589	0.0465125	0.0940989	1.0156	0.160792	0.404201	2.64894	0.0749727	0.420088	2.71218	0.380825	0.781017	1.72455	0	0.0631751	0.4192	0	0	1.21692	0.399884	2.84382	3.12909	1.9204	2.70247
18544	Pogk	NM_175170	7371	7.96814	0.0466747	0.094323	100.521	68.0204	117.154	132.18	100.551	111.969	87.5487	104.776	94.5835	103.7	83.6365	48.3079	72.1168	131.357	127.412	119.642	90.2074	126.42	137.355	131.59	133.356
11889	Kdm1a	NM_133872	3013	7.95329	0.0469869	0.0947402	163.862	154.607	238.049	288.918	146.224	139.317	183.715	210.804	110.924	192.189	144.784	133.918	185.118	193.751	210.449	305.244	242.752	283.231	282.376	301.121	288.943
12194	Kras	NM_021284	4668	7.93292	0.0474187	0.0954578	134.524	134.608	135.33	254.108	99.5855	90.3427	156.001	189.027	179.896	92.2917	152.654	160.069	91.1007	62.6064	117.658	180.008	181.048	294.392	237.707	236.783	247.552
10436	Hcfc1	NM_008224	8093	7.93053	0.0474694	0.0955322	135.059	147.16	232.89	166.104	194.779	163.386	109.423	118.463	110.085	114.22	205.87	84.3936	151.216	227.704	301.433	177.979	224.442	136.07	186.3	173.231	168.816
14745	Mybbp1a	NM_016776	4117	7.9293	0.0474956	0.0955568	33.2278	57.1604	58.0535	37.0365	29.6292	35.0035	38.2195	22.64	32.7696	41.1049	89.608	17.8845	63.9886	63.636	59.621	41.0342	67.923	26.5509	43.1484	38.6639	39.7828
11690	Kat5	NM_178637	1542	7.91871	0.0477219	0.0959287	97.8027	43.6417	94.7312	47.3889	93.274	120.763	56.7916	30.2233	64.8732	220.891	80.1314	7.44901	43.3446	37.0639	164.922	58.4579	118.481	27.1973	55.6939	50.7781	55.8862
8489	Galr2	NM_010254	1940	7.91385	0.0478262	0.0961106	2.07291	0	3.04081	1.95554	1.80166	0	6.51761	4.11821	0	0	0	0	0	7.30313	0	3.89916	0.960958	1.67363	2.0618	2.26834	1.8184
8543	Gbf1	NM_178930	6401	7.91184	0.0478692	0.096169	91.258	75.7377	99.9158	69.6122	102.765	115.398	78.5748	88.271	91.3127	71.226	83.0264	33.1746	111.012	103.58	99.9139	93.4566	102.712	50.6393	77.6328	74.4377	75.739
26488	Zbtb10	NM_177660	7446	7.90694	0.0479746	0.0963668	44.0778	44.1343	60.7264	92.7807	34.8067	40.9654	47.6101	34.5734	69.747	36.7643	66.9728	36.0341	29.396	39.023	99.8398	50.9642	53.0785	87.2828	88.4777	93.9076	101.454
7069	Elp4	NM_023876	3902	7.90166	0.0480885	0.0965395	19.5127	26.514	23.9607	45.321	15.6757	15.7265	18.9625	30.4849	17.5823	18.6445	29.3965	34.4188	15.7266	17.1702	16.2769	31.3405	31.0551	41.1194	46.7319	43.1276	50.3052
15537	Nod1	NM_172729	4322	7.89022	0.0483359	0.0968607	0.832415	0	1.48099	1.98706	0.566094	0	2.16706	0	2.26133	0	0	0	0	0	0	2.0419	3.88208	2.1911	2.28646	2.07147	1.39923
23719	Tert	NM_009354	3426	7.89142	0.0483098	0.0968607	2.81198	0.839095	12.7736	6.19349	0.357072	1.23856	1.77698	0.518215	12.8094	0.171711	1.03415	0	1.48313	37.4294	0.303907	8.46374	4.89735	4.10672	6.79903	7.17528	6.69293
322	2210018M11Rik	NM_172280	4014	7.8808	0.0485405	0.097081	64.9535	63.2355	79.6304	141.938	52.9421	43.017	78.8671	41.5765	67.6506	105.668	61.0141	96.2664	32.4258	79.4474	52.2668	94.5389	92.2686	141.149	151.173	137.076	138.356
10225	Gtf2ird1	NM_020331	3595	7.86779	0.0488246	0.0975727	17.6482	30.3238	39.5594	22.5024	29.6535	24.0607	11.2028	26.7916	9.43525	4.74552	30.5517	28.3462	32.0735	38.0746	43.1535	42.7841	34.2256	17.0846	24.3469	24.1862	24.3917
15318	Nkapl	NM_025719	1455	7.85788	0.049042	0.0979002	1.95074	0	3.00897	3.86371	0	3.02853	2.57486	6.10105	0	0	0	0	0	1.65043	0	9.53128	0.854185	3.90513	2.91077	3.96307	4.67588
2985	Bcl6	NM_009744	3285	7.85481	0.0491096	0.0979927	1.39109	0	0.157624	1.7847	0	8.34652	0	0	0	0	0	0	0	0.438606	0	0.191892	0	2.05913	2.00549	1.61675	1.45741
13292	Mbd3	NM_013595	1589	7.85068	0.0492007	0.0981179	103.301	154.894	162.432	102.166	58.4004	88.5349	118.181	114.524	84.1804	155.986	202.625	111.025	151.032	124.375	124.661	153.922	246.769	101.315	97.5799	104.951	104.819
2802	Bahcc1	NM_198423	10727	7.83863	0.0494673	0.0985785	29.7672	26.1936	50.3161	21.2751	73.1173	30.9612	20.5622	25.24	13.1843	15.5383	40.1714	4.8872	33.5223	82.4036	45.2553	39.137	34.4686	14.352	23.5792	23.3267	23.8424
1646	Akap8l	NM_017476	2072	7.81144	0.0500736	0.0996435	30.6219	49.6624	55.8505	34.601	39.0514	28.671	30.964	34.06	21.4574	29.5276	41.0388	60.4112	47.5373	65.2495	62.0592	50.8064	45.2869	24.4192	38.1547	38.0092	37.821
9131	Gm14403	NR_036450	3710	7.79623	0.0504162	0.100196	9.34661	2.98751	2.13245	6.13066	0.51816	2.06755	9.08835	2.39273	9.40106	32.6118	4.5362	0.317544	4.10879	1.74763	0.701608	3.5681	2.51248	10.429	5.64436	3.76292	4.68638
18718	Ppil4	NM_026141	2896	7.79508	0.0504423	0.100219	59.9016	78.107	72.4525	135.679	43.1472	36.7435	78.4278	50.2704	48.3724	102.448	110.26	34.5779	89.4826	40.7967	72.7141	69.6535	106.646	141.731	123.412	131.833	145.74
6912	Egr3	NM_018781	1416	7.78984	0.0505606	0.100382	2.73841	1.77028	9.94576	0.320762	13.3293	0.576286	0.330722	2.19418	0	0	2.81489	2.49595	0	6.44435	0.367651	4.00655	28.9645	0	0.498491	0.428655	0.355901
7125	Eng	NM_001146348	3430	7.77876	0.0508124	0.100809	0.659913	1.85085	7.6353	7.71073	0.407607	0.0475814	0.409594	0.388208	1.62025	1.08623	3.61532	0	1.93722	0	0	7.35119	23.19	6.23178	9.67217	7.07843	7.86054
22233	Snd1	NM_019776	3482	7.75097	0.0514488	0.101855	63.7234	55.1044	93.6597	51.3109	65.5982	82.1646	45.324	53.7924	59.6595	75.8018	37.1396	62.1694	66.0043	81.1721	158.779	59.0175	75.6697	47.711	51.4227	53.2106	52.8995
352	2310044G17Rik	NR_033623	4250	7.74336	0.0516245	0.102157	83.0475	53.8032	54.3063	92.3054	149.76	59.3679	91.1262	83.444	70.4773	44.1095	50.4358	22.8688	88.1049	46.2193	44.8323	71.3424	54.8311	81.8712	97.6582	91.332	98.3603
11689	Kat2b	NM_020005	4654	7.73885	0.0517287	0.102334	7.50466	17.8957	9.35292	19.5135	5.48241	5.75107	4.42744	3.91016	19.6002	5.85669	11.8951	11.1379	30.6542	9.08124	3.5795	12.8673	11.8836	23.4292	19.0596	18.9435	16.6217
27197	Zscan2	NM_009553	2286	7.73117	0.0519069	0.102584	16.502	39.0216	38.7958	15.1992	10.4734	32.7693	10.4477	5.63066	34.2868	5.40415	26.9291	6.1842	83.9516	42.8591	39.2836	51.5652	21.4751	9.58711	16.1593	17.5242	17.526
5518	Cux1	NM_198602	2972	7.72779	0.0519857	0.102696	156.128	108.336	209.751	215.029	173.35	164.083	138.821	176.226	111.487	172.803	114.147	100.784	110.078	186.647	287.01	151.864	213.482	208.481	218.741	217.966	214.927
26519	Zbtb42	NM_001100460	3477	7.72442	0.052064	0.102792	0.710742	7.68659	6.87246	2.79768	1.4576	0	0.808115	0.510614	1.48812	0	0.127373	0	22.9324	4.21293	2.47046	5.25757	15.5489	2.25669	3.11281	2.4876	3.33362
12022	Klf16	NM_078477	2652	7.72041	0.0521577	0.102947	6.72786	5.19681	18.9558	2.72566	1.97694	16.9851	13.9502	4.85358	2.60141	0	3.33994	11.661	0.589536	15.7556	37.8863	10.9339	11.2474	2.55062	3.46011	2.23153	2.6604
14885	Naa15	NM_053089	6089	7.71589	0.0522633	0.103082	64.4432	56.1438	68.3634	111.902	66.0127	49.8806	82.2164	59.4086	59.5148	69.6263	77.898	25.6359	64.8976	45.5507	58.9932	79.6108	89.2991	117.755	120.638	111.347	97.8696
22586	Spdef	NM_013891	1824	7.71146	0.0523669	0.103198	0.899283	0	2.20162	0.754808	0.574873	3.84747	0	0.973358	0	0	0	0	0	3.68631	0	0.691189	4.42898	0.741693	0.644977	0.665543	0.967021
10227	Gtf3a	NM_025652	1298	7.70746	0.0524609	0.103354	90.2023	75.0843	108.149	58.1234	73.9168	131.645	79.0125	101.559	61.566	93.5146	82.9114	61.0374	81.3042	80.6623	122.127	67.99	161.818	51.4874	61.269	63.2461	56.4912
3053	Bhlhe22	NM_021560	3190	7.70489	0.0525212	0.103414	1.09815	4.12509	11.8663	11.0084	0.383489	0.613934	0.146803	0.278277	5.16639	0	0	0	12.3753	10.5389	5.95663	13.4372	17.5322	13.062	10.2523	10.8456	9.87374
10670	Hivep3	NM_010657	9021	7.70397	0.0525428	0.103442	15.6939	12.187	17.4423	7.06651	24.2546	31.3165	2.23224	7.18349	13.8082	15.3684	22.5341	9.17424	4.85274	21.2159	20.4579	9.01419	19.0814	5.48877	7.53776	7.50225	7.73727
3689	Ccar1	NM_026201	4476	7.70206	0.0525877	0.10351	158.557	170.481	204.892	320.863	119.943	112.157	172.004	137.34	193.649	216.246	217.876	108.439	185.127	155.531	287.455	219.839	156.743	473.255	277.814	275.79	256.594
4653	Cipc	NM_173735	4098	7.69937	0.0526511	0.103596	86.5017	56.1443	56.2149	95.5206	156.68	61.7293	94.6205	87.6222	73.0914	45.2671	52.1985	23.717	92.5174	47.8164	46.4952	73.8348	56.7133	84.7758	100.936	94.4234	101.947
27039	Zfp879	NM_173387	2408	7.69902	0.0526593	0.103598	5.64406	0.717779	0.97264	4.28943	1.1612	9.62417	4.27851	1.29027	17.4288	0.0814342	0.367838	0	1.7855	1.09697	2.27003	0.523558	0	2.92143	5.4718	4.47418	4.29032
11770	Kcnip3	NM_019789	2732	7.69198	0.0528256	0.103866	1.56229	8.49032	21.5915	13.6624	8.95556	0.418166	0	0	0	0	20.7497	0	4.72125	28.5668	23.4381	17.0743	17.2869	6.73453	17.5691	15.4965	14.8494
13180	Mapk11	NM_011161	2442	7.68469	0.0529982	0.104176	44.9557	54.1216	28.989	37.737	36.999	64.0921	38.7376	26.9001	66.4687	36.5367	80.1603	37.3882	44.8163	16.8155	14.9228	52.9176	31.3	35.4555	39.2146	40.2662	36.0116
5401	Ctbp1	NM_013502	2254	7.68054	0.0530967	0.104354	170.676	152.254	218.224	145.677	169.489	141.41	206.519	197.114	153.888	155.64	197.271	136.024	123.467	190.703	259.719	221.215	201.258	116.198	154.283	150.465	161.762
27079	Zfp959	NM_145490	2057	7.67512	0.0532255	0.104504	2.23294	4.6506	11.7826	10.3618	0.594715	0.238023	1.59364	4.31552	4.84449	1.81127	7.75088	5.44086	0.760063	6.07055	21.6387	6.12897	13.2924	13.2851	8.57879	8.92611	10.6573
26124	Vwc2l	NM_177164	4655	7.66929	0.0533644	0.104717	12.032	4.5684	22.2589	16.7064	13.1024	21.1762	1.10662	7.5326	5.55768	23.7166	6.75494	4.93507	2.01519	24.2974	15.2096	18.9583	30.5704	16.1586	18.0446	15.6797	16.9429
19658	Raf1	NM_029780	3066	7.66558	0.0534532	0.104832	117.176	89.0074	159.737	100.376	135.887	130.627	150.602	142.16	57.6911	86.0868	101.258	41.9786	123.786	168.315	160.457	148.031	162.145	81.2768	101.989	108.933	109.306
7282	Erlin1	NM_145502	3332	7.65557	0.053693	0.105153	14.613	31.4702	27.9377	32.167	16.3642	19.9842	13.7736	14.2533	15.2987	8.00382	38.2799	31.3792	24.7515	20.612	47.9658	32.729	10.444	30.3701	32.059	30.9226	35.3162
6929	Ehmt2	NM_145830	4019	7.64717	0.0538951	0.105489	56.5737	60.3791	65.1149	41.718	47.2669	45.3999	54.5324	47.5989	74.4328	70.2112	46.0618	39.5726	95.503	66.3229	51.1656	83.4421	59.5289	33.19	44.2006	44.5906	44.8908
15352	Nlrc3	NM_001081280	4080	7.62195	0.0545065	0.106295	0.314719	0.0957996	1.57761	1.819	0.899507	0.880023	0	0.108787	0	0	0	0	0.287399	1.00057	0.255193	2.00851	3.04617	0.862109	2.13373	1.74803	2.53213
19889	Rbmxl1	NM_009033	1725	7.61519	0.0546714	0.106542	32.8572	71.2026	29.517	59.0828	13.0691	11.8264	16.5603	28.8182	53.5473	73.322	43.9026	131.639	38.0666	26.1714	19.7675	31.0614	41.0677	74.191	55.105	53.5722	53.4632
23350	Taf6	NM_009315	2264	7.604	0.0549455	0.106957	58.4632	63.7779	112.875	51.9454	121.268	35.3946	91.6334	44.3067	30.9802	27.1967	71.987	47.8729	71.4739	48.8971	164.525	104.133	133.946	32.7456	60.069	59.652	55.315
26518	Zbtb41	NM_172643	8362	7.59731	0.0551102	0.107201	81.5438	62.5268	56.2452	90.8423	79.6061	96.4158	92.7981	82.4856	64.6505	73.3065	94.9097	23.211	69.4596	71.7367	58.6461	57.2921	37.306	86.8139	91.3631	87.6492	97.5428
1546	Agtr2	NM_007429	2868	7.58715	0.055361	0.107492	0.450992	0.0514733	2.42856	1.13431	0.731219	0.341431	0.163285	0	1.47002	0	0.15442	0	0	0.334919	0	4.39585	4.98349	0.849068	1.06651	0.952367	1.66931
15004	Ncf1	NM_010876	2721	7.57037	0.0557775	0.108102	3.41488	0.0542542	0.56415	2.93525	0.128454	0	0	0.326241	0	20.0346	0.162762	0	0	0	0.191324	0.694999	1.37027	2.48594	3.11296	3.17876	2.96336
26958	Zfp72	NM_001081680	1629	7.53975	0.0565458	0.109257	14.4289	5.37624	1.51561	11.9629	4.93494	0.901681	21.5609	2.72469	20.9401	35.5111	15.2247	0.903998	0	1.0319	0	5.03053	0	14.1181	13.4326	10.2467	10.0544
19771	Rasl11a	NM_026864	1126	7.53786	0.0565937	0.109319	1.48611	0.115708	7.08054	2.90441	0	1.01459	7.90209	0	0	0	0	0	0.347125	8.74388	14.5637	3.35896	1.65565	1.68205	2.71646	3.63862	3.5805
8064	Fhl2	NM_010212	1563	7.49462	0.0576969	0.111047	24.5792	5.75149	23.69	15.8344	22.6977	29.5501	14.3817	30.3852	47.4495	3.01103	6.23371	3.76868	7.25208	17.8221	46.6302	6.45287	23.8549	15.0605	16.1073	15.2423	16.9275
21281	Sfmbt2	NM_177386	7594	7.48713	0.0578902	0.111311	1.12842	4.55302	4.95786	8.87765	1.51886	2.42851	0.308337	0.116895	2.37212	0.0258222	4.5489	0	9.11017	8.15846	1.09685	1.41114	9.165	7.66032	9.32599	9.73127	8.79302
13443	Med6	NM_027213	1004	7.47357	0.0582415	0.111862	47.1197	41.3776	83.4783	109.273	27.8504	46.3279	40.1136	84.4378	33.4029	50.5859	43.6701	36.0819	44.3808	53.3372	74.926	98.5729	107.077	101.868	111.316	106.704	117.205
1257	Actr8	NM_027493	2121	7.4703	0.0583266	0.111982	25.2791	31.0514	30.5443	69.1683	24.2243	24.8538	44.821	20.9265	25.5697	11.2793	6.68178	48.8788	37.5935	26.0403	32.8899	38.6362	24.6107	77.178	66.2266	63.8884	69.3801
10669	Hivep2	NM_010437	9768	7.46278	0.0585224	0.112221	33.0195	23.753	32.3194	22.0324	46.3024	47.6681	25.026	27.0364	38.4529	13.631	21.7176	26.4129	23.1284	38.6215	28.7531	27.1041	34.799	15.8719	18.8124	22.6187	30.8265
3016	Bdp1	NM_001081061	9921	7.4521	0.0588022	0.112704	41.4329	41.2483	35.0094	68.0791	45.7117	50.075	47.864	23.1746	57.6978	24.0744	61.6036	17.1886	44.9525	30.0625	30.8022	35.3273	43.8458	71.6173	66.9743	66.9013	66.8233
4531	Chd8	NM_201637	8190	7.44905	0.058882	0.112826	62.3283	65.1392	95.9743	117.629	64.1005	64.923	66.5573	59.4511	62.2645	56.6732	51.3715	28.5532	115.493	99.5732	109.871	91.9762	82.4766	106.345	121.551	123.248	119.374
11228	Ikzf5	NM_175115	4390	7.43554	0.0592381	0.113398	10.8946	7.08478	14.5568	24.8547	13.1768	12.7143	8.96069	10.8182	7.72659	11.9711	11.5007	0.939251	8.81443	12.1436	7.17446	18.6668	20.2421	24.5916	23.9039	24.9219	26.0014
6680	Dynll1	NM_019682	2021	7.42919	0.0594061	0.113657	248.923	219.135	225.086	189.249	171.389	174.671	319.308	325.916	207.093	295.159	239.517	185.807	232.08	197.361	160.48	332.493	210.01	206.441	175.098	188.685	186.77
6215	Dhx9	NM_007842	4613	7.42602	0.0594901	0.113792	257.762	319.189	301.612	458.296	223.443	254.093	241.816	213.026	393.826	220.366	381.625	237.444	338.499	255.494	323.72	295.983	331.253	511.988	432.066	450.396	438.736
18845	Pqbp1	NM_019478	1059	7.414	0.0598097	0.114278	152.157	186.387	144.101	109.205	142.416	143.632	70.7539	117.354	193.808	244.978	163.517	233.616	162.029	204.309	70.2973	136.906	164.89	79.2036	114.2	117.784	125.632
24746	Trim28	NM_011588	3242	7.40439	0.0600668	0.114636	169.64	191.981	279.536	179.91	180.529	198.443	172.616	130.609	126.911	208.735	121.989	285.529	168.425	265.913	372.38	235.463	244.389	154.563	192.904	183.385	188.789
19901	Rbpj	NM_001080927	5420	7.39236	0.0603896	0.115122	22.0618	30.8243	23.8632	50.3278	22.0547	15.0256	33.7835	26.2052	23.7602	11.5413	34.8908	7.39023	50.1919	11.6967	22.908	30.0063	30.8417	63.3991	47.9691	46.3351	43.608
795	9130023H24Rik	NM_177001	3581	7.35222	0.0614798	0.116593	9.72547	2.49641	9.13305	11.1628	6.88114	10.1177	15.3006	11.7749	5.29798	8.98055	3.21552	3.61882	0.654893	5.63292	8.57722	7.74533	14.5767	9.21795	12.681	10.5089	12.2436
15240	Nfkbil1	NM_010909	1470	7.34071	0.0617956	0.11711	11.2067	2.18005	6.59928	3.75008	14.1473	10.5472	10.8315	6.94461	1.82511	22.9443	3.61532	0	2.92482	2.28702	15.5824	5.14583	3.38188	2.02467	4.32161	4.02586	4.62817
12376	Larp7	NM_138593	2121	7.33615	0.0619214	0.117238	26.9367	57.7954	56.8708	78.6373	27.8498	26.7775	15.0139	20.9265	53.5788	17.4737	111.085	52.3503	9.95123	41.0984	94.4971	33.5838	58.3039	92.8688	70.3311	76.6232	74.7261
4578	Chp1	NM_019769	2594	7.33404	0.0619797	0.117268	20.1182	18.643	35.5696	44.8336	29.4413	17.7423	16.4285	24.6394	21.5721	10.8857	18.9512	13.1706	23.8073	34.7152	35.5224	45.9286	26.1121	42.0353	43.7196	46.5644	47.0152
18946	Prkcb	NM_008855	8829	7.32579	0.0622076	0.117657	58.9235	40.4681	93.3347	81.8501	55.9577	70.89	42.5392	61.9853	48.1643	74.0043	63.1033	44.4002	13.9009	107.271	87.8859	72.2538	105.928	84.9495	81.5738	81.9647	78.9126
23338	Taf1b	NM_020614	2019	7.32007	0.0623663	0.117903	26.5869	24.0875	49.3507	62.0484	30.6417	24.9778	28.9935	16.9275	41.8583	16.1226	13.6	31.9467	26.7157	39.0118	60.0784	52.4523	45.8601	55.6148	63.8621	66.4396	62.2769
13416	Med12l	NM_177855	10243	7.29782	0.0629873	0.118802	15.7589	17.5626	25.7099	38.0596	20.6274	27.7079	12.1156	11.0497	17.9607	5.09235	23.0021	5.72195	23.9638	13.5741	34.0777	24.2471	30.9405	34.7622	37.6947	39.8063	39.975
12017	Klf11	NM_178357	3980	7.28981	0.0632124	0.119131	38.34	24.258	60.2815	54.5791	36.533	32.7229	40.3587	53.6413	39.2422	27.5418	35.2743	7.25206	30.2476	50.4408	40.8757	60.3439	89.4657	44.5284	54.9201	57.2662	61.6016
17386	Pa2g4	NM_011119	2432	7.28798	0.0632638	0.119193	213.158	205.195	229.251	161.068	223.554	243.531	167.719	156.041	265.077	223.024	207.781	238.088	169.716	207.454	375.889	177.031	156.632	157.981	166.114	159.169	161.009
1351	Adar	NM_001146296	5909	7.28251	0.0634181	0.119419	38.2031	37.7172	56.559	28.3959	50.6332	50.4886	25.2815	19.2293	24.6154	58.9708	58.0859	28.0118	27.0541	68.7615	86.7362	41.818	28.9204	25.001	29.3462	29.301	29.9354
20276	Rnf10	NM_016698	3111	7.28147	0.0634475	0.119442	132.376	100.849	155.297	107.381	166.56	144.423	130.511	103.294	87.4101	162.056	78.1547	101.014	123.377	169.894	151.024	144.066	156.204	80.1881	119.572	117.259	112.503
20045	Rfx1	NM_009055	4172	7.27553	0.0636154	0.119725	18.5329	24.6093	22.5841	12.6366	33.5113	23.1975	20.4293	6.59606	11.5295	15.9338	30.891	21.1079	21.8291	21.1818	24.7694	20.851	23.5341	12.3871	12.7457	12.7302	12.6835
8318	Fubp3	NM_001033389	3740	7.26876	0.0638073	0.120021	42.7574	73.7124	63.3261	107.282	12.4763	43.8557	47.3311	56.0155	34.9968	61.8691	104.68	24.176	92.2811	47.3211	27.9088	78.8798	99.1945	148.886	90.5291	95.7934	93.9191
27227	Zxdb	NM_001081473	5623	7.26019	0.0640513	0.120415	5.16631	11.5622	4.51153	13.0412	1.80262	2.08976	6.74596	5.28864	7.25923	7.81166	8.19121	24.8273	1.66827	0.811417	3.33298	6.16575	7.73597	16.9377	13.39	11.0374	10.7997
23451	Taz	NM_001173547	1853	7.24402	0.0645135	0.121119	28.75	60.8695	36.6681	41.6423	38.4796	24.3089	33.3599	27.3066	20.684	28.3611	48.7571	48.001	85.8505	25.4003	15.0306	42.5232	63.7181	36.5043	39.7437	44.6306	45.6906
7358	Etv3	NM_001083318	5141	7.23772	0.0646947	0.121328	7.57962	4.06069	15.9995	10.0624	7.78454	12.857	2.55057	15.9721	4.06311	2.25044	5.25491	1.83325	5.09391	17.2828	23.088	12.5067	11.1205	10.1049	10.2975	9.79945	10.0478
25509	Usp16	NM_024258	2917	7.23465	0.0647831	0.121461	91.0132	103.506	75.4627	143.896	93.9409	72.902	71.9231	66.9505	70.7552	169.607	105.519	126.209	78.7888	62.8949	75.9385	93.3553	69.6621	144.885	136.559	143.317	150.824
26884	Zfp605	NM_001163996	3158	7.22852	0.06496	0.121743	25.1385	41.0675	39.8641	74.6226	9.62903	13.385	45.6736	27.9691	41.5072	12.6672	50.0655	11.005	62.132	20.9873	21.1007	75.6517	41.7166	91.1609	70.631	65.6852	71.0134
6638	Dusp22	NM_134068	1058	7.22539	0.0650504	0.121879	83.4152	105.902	36.3832	49.996	54.5097	78.6712	69.9356	67.1231	13.5848	216.667	118.882	133.064	65.7594	91.9238	1.96822	38.1317	13.5091	51.9146	52.4838	48.1909	47.3947
2427	Asf1b	NM_024184	1599	7.22493	0.0650639	0.121888	1.71928	0	2.55826	5.02246	0.109294	0	0	2.77581	7.43058	0	0	0	0	0	0	9.06715	1.16589	4.06108	6.18016	4.17557	5.67305
11498	Irf8	NM_008320	2827	7.21081	0.0654735	0.122473	0.358916	0	1.91171	1.5433	0	0	2.1535	0	0	0	0	0	0	4.33215	3.31471	0	0	0.669964	2.16395	1.55662	1.78265
15709	Nr1d2	NM_011584	4640	7.20753	0.0655691	0.122602	1.98578	2.31733	11.9559	4.86898	7.98478	2.1104	0	0.860918	0.578215	0.380354	1.8135	0	5.13849	3.93328	21.3174	5.16247	17.4105	3.26549	5.42581	5.78851	4.99611
14732	Mxd3	NM_016662	1299	7.18158	0.06633	0.123858	15.1543	28.4932	6.76095	13.8615	4.30513	2.63841	24.8752	15.0342	13.2774	30.7953	22.8428	10.883	51.7539	5.54589	2.20421	11.1612	8.13251	16.6633	14.4904	12.2657	12.0267
24664	Trak2	NM_172406	6240	7.17527	0.0665164	0.124122	24.2684	17.3785	26.283	46.3014	23.2175	30.7054	35.7231	30.1591	16.0005	9.80468	27.6088	14.2541	10.2727	28.9011	33.4965	28.8917	13.8425	39.5448	49.5461	48.344	47.7708
26876	Zfp595	NM_177622	3909	7.16986	0.0666762	0.124305	2.38634	0.187986	2.06565	4.89125	3.44247	2.33805	7.18807	0.113546	0.784393	0.451482	0.113297	0.150689	0.299971	3.74734	0	4.51527	0	4.98363	5.83855	4.03719	4.70565
22092	Smarca1	NM_053123	4055	7.16851	0.0667165	0.124328	48.0905	50.1668	48.859	86.2347	32.0647	48.3777	52.8934	56.6991	60.2085	38.2999	50.5677	41.3276	58.6052	37.427	53.2148	52.077	52.7172	91.213	81.4658	83.3375	88.9224
12026	Klf4	NM_010637	3044	7.15941	0.0669868	0.124781	26.1915	23.5793	13.1337	10.5143	10.1045	8.57841	13.5383	36.453	18.2571	70.2175	53.8319	4.45073	12.4552	7.17886	3.16392	9.73296	32.4592	9.33305	11.1306	10.4187	11.1751
26783	Zfp397	NM_027007	5486	7.1515	0.0672226	0.125153	36.0511	60.033	45.6493	87.0623	18.2853	12.5839	63.1688	24.8382	41.8835	55.5468	96.632	57.3905	26.0765	25.0817	24.9099	69.1723	63.4333	92.4257	85.4343	85.9679	84.4213
20338	Rnf20	NM_001163263	4312	7.14199	0.0675072	0.125565	66.8569	72.7044	97.7263	132.266	83.7736	55.7513	79.3899	48.1731	70.8417	63.212	120.785	33.6051	63.7236	86.4314	118.558	81.8655	104.05	121.355	132.049	140.553	135.105
11570	Itgb1bp1	NM_008403	1874	7.13688	0.0676606	0.125799	46.4186	101.871	51.5593	76.7944	40.6595	21.8593	61.2242	45.2378	95.614	13.917	123.363	80.4672	101.783	28.5755	19.1681	69.293	89.2006	90.0936	69.1801	80.0016	67.9023
8230	Foxn2	NM_180974	5084	7.11974	0.0681775	0.126506	12.7307	5.76817	15.2709	18.2489	10.6906	10.8503	8.19806	17.548	19.2617	9.83554	5.31382	3.53381	8.45689	15.0676	19.4557	11.1591	15.401	22.7781	16.1054	17.013	17.0992
1041	Abcg1	NM_009593	5818	7.11417	0.0683465	0.126734	8.78291	12.3227	23.0717	10.162	17.0015	9.39729	9.25658	9.61245	0.823466	6.60611	7.53606	15.7943	13.6379	25.2602	15.7932	12.5683	38.6652	8.83606	10.5147	11.0326	10.2645
20525	Rprd1b	NM_027434	3320	7.07962	0.0694027	0.1283	34.845	9.68187	39.0346	37.9554	42.6376	45.4219	45.2787	35.9626	27.1293	12.6398	9.73795	0	19.3077	22.1331	43.1998	41.3914	49.4141	34.0657	39.9705	38.8501	38.9351
23959	Tirap	NM_001177845	4749	7.07959	0.0694037	0.1283	1.554	0.435199	3.30028	6.08496	2.35517	0.824784	0.0986108	2.99079	0.0403531	3.01428	1.3056	0	0	0.606789	2.08281	3.05293	7.45861	6.55201	5.94536	5.6876	6.15486
23333	Taf11	NM_026836	1220	7.07616	0.0695095	0.128478	72.1516	41.4562	123.662	112.903	92.824	56.0513	74.8517	94.5913	69.5862	45.0051	83.1301	14.9675	26.2711	55.507	229.787	72.3369	137.018	133.954	98.7436	108.211	110.705
23763	Tfam	NM_009360	3918	7.06347	0.0699021	0.129117	23.1028	35.1162	20.5573	39.7422	21.9455	17.4951	25.1005	19.0319	32.7221	22.322	11.8688	54.2739	39.2059	20.7775	18.4692	22.3636	20.6188	39.5012	36.9326	40.8601	41.6748
22104	Smarcc1	NM_009211	5673	7.0565	0.0701184	0.129465	182.445	117.721	199.847	243.945	204.242	195.281	158.908	130.112	125.968	280.158	142.239	75.7462	135.179	169.573	240.567	189.009	200.239	229.028	246.776	251.73	248.247
4229	Cdk5	NM_007668	2058	7.05259	0.0702402	0.129656	64.3308	85.3725	60.7291	49.2655	102.666	81.6021	37.7737	54.7805	46.4659	62.6966	59.6097	77.9955	118.512	91.1307	32.5055	43.1882	76.0922	33.6569	50.3044	57.8809	55.2197
1561	Ahr	NM_013464	5494	7.0445	0.070493	0.130053	11.1701	15.8422	9.36322	7.28797	10.4971	10.2782	7.92722	13.734	9.55743	15.0265	29.1812	9.3814	8.96408	8.47953	5.82754	5.04842	18.0974	9.6034	6.76655	6.13162	6.65031
14855	Mypop	NM_145579	2175	7.02971	0.070957	0.130769	10.1883	3.0559	8.78352	2.87726	22.5784	17.1083	5.16748	2.0407	0.440545	13.7942	5.7014	1.48954	1.97677	5.6308	17.9515	8.69468	2.8571	1.9904	3.4617	2.58139	3.47556
3172	Brd7	NM_012047	2369	6.99011	0.0722137	0.132679	57.3948	82.0179	85.6898	122.827	44.4834	44.9862	56.734	87.3089	80.9745	29.8817	74.5917	96.2264	75.2356	86.871	66.4751	112.556	76.8577	113.984	123.851	128.492	124.979
23091	Sufu	NM_015752	2359	6.99016	0.0722121	0.132679	8.98409	5.42239	32.7811	16.5208	13.1867	3.18245	7.14663	1.69337	17.1409	11.5545	15.7701	0	0.497069	14.8622	41.1576	20.5757	54.529	13.0754	18.5517	16.7246	17.7314
27038	Zfp874b	NM_001076791	3772	6.98483	0.0723829	0.132902	1.66848	7.78408	1.9022	6.28317	1.99224	0	4.46948	1.76505	1.52415	0.259933	2.11341	15.8505	5.38834	0.954945	0	4.51215	2.14169	8.39253	7.29815	6.2355	3.20651
26978	Zfp772	NM_145577	2772	6.98219	0.0724678	0.133023	5.22327	6.63251	15.8248	17.2705	7.81761	3.76806	6.92655	2.56191	8.7799	1.48556	7.50909	10.8374	1.55104	8.74958	16.9024	14.7813	22.8661	20.4977	16.6365	16.313	15.635
10206	Gtf2h1	NM_008186	2745	6.98055	0.0725202	0.13307	30.6976	63.3938	50.757	53.8868	28.7767	30.3221	24.0549	23.9308	57.4562	19.6451	67.4399	99.2471	23.4945	60.0998	52.3438	50.0617	40.5224	51.1569	51.2575	56.2199	56.9131
11408	Insig2	NM_133748	2435	6.9708	0.0728345	0.133589	48.6443	38.1326	23.3107	50.0055	30.2872	26.0725	50.9652	31.7167	122.223	30.6019	45.4699	31.2061	37.7218	13.8066	7.16217	39.6081	32.666	54.3361	45.5115	51.8484	48.326
14934	Nampt	NM_021524	4546	6.96302	0.0730858	0.133979	37.6656	37.0367	53.4922	87.247	26.5256	18.7042	49.2408	38.0779	53.1997	40.2453	62.2521	13.8645	34.9936	29.8983	26.3389	56.7134	101.018	105.407	79.1883	82.4144	81.9788
27015	Zfp827	NM_178267	7604	6.96054	0.0731662	0.134074	45.9571	34.1475	76.8494	68.3277	72.6946	64.7537	48.1605	33.5632	38.0804	18.4902	39.8379	13.0529	49.5517	85.2669	100.983	71.5419	49.6057	62.6964	69.8374	70.9229	69.854
18276	Pkn1	NM_177262	3049	6.95783	0.0732542	0.134146	27.8294	10.9141	22.2713	13.0757	37.0845	44.4275	31.4864	27.95	17.4101	8.61809	11.6202	0.482982	20.6392	14.2554	29.4531	23.5689	21.8078	7.09923	16.8228	13.8356	14.5451
4667	Ckap2	NM_001004140	2601	6.93942	0.073854	0.135101	4.79089	7.60566	11.6987	25.2341	5.64396	3.7648	1.80047	4.43681	10.536	2.56332	20.2623	0	2.55466	3.23137	22.8172	14.0566	6.68964	25.3822	25.0575	27.5368	22.9599
17890	Per1	NM_001159367	4643	6.92451	0.0743432	0.135889	20.1141	19.8434	35.4046	11.2627	23.9012	12.5136	12.5069	18.5456	5.36567	47.8514	19.8403	3.99632	35.6936	88.2347	13.0064	15.8847	24.4927	7.22607	13.0743	12.648	12.1023
6007	Ddx39b	NM_019693	1737	6.92095	0.0744605	0.136049	396.44	444.183	642.001	438.857	448.222	354.032	371.245	413.955	226.39	564.799	557.357	263.493	511.699	724.42	686.032	544.719	612.833	338.329	459.061	465.977	492.061
11651	Jmjd1c	NM_207221	8381	6.91642	0.0746101	0.13625	89.651	124.62	125.915	158.697	109.765	95.5741	76.8305	78.8563	99.8085	77.071	162.069	70.2482	141.542	89.0807	141.158	107.706	165.717	162.258	156.456	158.352	157.723
23807	Tgfb1i1	NM_009365	3026	6.90853	0.0748711	0.136547	39.1845	27.5045	18.6901	21.0619	38.7524	25.6726	26.1544	35.3497	8.99288	100.185	61.47	11.485	9.55843	9.68166	8.94609	19.3734	36.7595	18.5089	24.7262	20.861	20.1516
15938	Nup85	NM_001002929	2147	6.90026	0.0751456	0.136892	38.5623	68.8404	78.9477	54.7961	33.2103	41.6562	25.52	58.2981	16.245	56.4443	49.3002	92.0468	65.174	44.068	114.933	96.008	60.7816	44.7379	58.0822	60.4997	55.8647
26427	Ybx2	NM_016875	1564	6.88195	0.075757	0.1378	4.9504	4.59608	19.7311	5.49201	2.68176	10.8525	2.39541	2.55413	8.20951	3.00911	1.41585	0.376627	11.9958	32.397	2.99574	15.7188	27.8129	4.67096	4.51319	6.50054	6.28334
27229	Zxdc	NM_173002	4122	6.87626	0.0759482	0.138036	24.6717	38.8933	50.1183	34.3371	30.6956	31.3976	24.7671	19.7052	27.3833	14.0814	39.109	31.5815	45.9894	81.269	34.4789	21.2568	63.4686	32.5576	33.6777	35.0461	36.0667
6012	Ddx41	NM_134059	2205	6.87299	0.0760582	0.13813	52.3493	51.1839	54.2577	32.8903	39.7869	106.138	41.4145	49.7194	33.4604	43.5764	49.6102	61.5759	42.3656	59.5714	61.031	42.8819	53.5464	22.0873	33.2924	38.8134	37.3682
11906	Kdm5c	NM_013668	6267	6.86772	0.0762355	0.1384	41.3411	36.4047	74.832	42.4591	48.5216	57.9431	43.0417	38.3864	31.649	28.5051	49.609	12.6419	46.9633	53.5298	45.0234	152.386	48.3888	30.6102	46.2916	50.315	42.6195
25320	Ubp1	NM_001083319	3852	6.86748	0.0762437	0.1384	89.8074	143.168	146.952	123.95	66.8739	68.8915	82.7918	86.4196	105.022	128.846	78.7566	171.652	179.094	100.244	195.02	140.899	151.644	122.15	118.56	128.384	126.709
23557	Tcea2	NM_009326	1163	6.85602	0.0766312	0.139043	52.4094	52.8233	38.075	30.4233	72.2788	53.6062	55.1655	27.86	29.1657	76.3804	54.0744	63.0577	41.338	30.3526	52.5965	29.8109	39.54	24.1954	32.1674	31.3143	34.0159
22760	Src	NM_001025395	3869	6.85203	0.0767668	0.139216	32.8245	23.3672	43.6024	22.554	33.561	15.6075	52.7733	30.6302	17.1379	47.2368	26.2132	20.2489	23.6396	36.9919	52.4092	59.6313	25.3772	14.4061	26.0282	24.3167	25.4648
22944	Stat1	NM_009283	5166	6.84602	0.0769708	0.139513	5.71065	4.04745	10.0483	15.3346	10.0473	9.88829	4.9858	5.15507	1.11287	3.07464	1.80031	3.07863	7.26341	16.7808	9.7246	6.7112	6.97684	11.3654	14.7567	15.9499	19.2666
6304	Dmap1	NM_023178	1513	6.84529	0.0769959	0.13954	47.3533	93.0661	82.9033	52.6952	54.7501	69.3591	66.8562	40.1901	24.1921	28.7725	29.8569	65.4062	183.935	54.4395	90.6651	60.8283	125.68	33.0835	52.5626	62.1819	62.9529
15233	Nfkb2	NM_001177369	3052	6.83682	0.0772848	0.139972	6.94356	7.79307	6.00512	2.07339	1.31701	2.62025	16.7251	6.98062	7.78604	6.23233	7.54574	3.66706	12.1664	2.28177	1.70575	5.57662	14.4564	1.68441	1.69604	2.43626	2.47685
22109	Smarcd2	NM_001130187	2755	6.81615	0.0779944	0.141017	3.21763	2.40016	12.2892	6.04666	3.36201	5.45001	6.11938	1.93329	2.15635	0.284709	0.160754	3.63476	3.40497	6.97312	17.0067	9.83872	15.3381	3.24094	5.80746	7.82128	7.31696
17500	Parp1	NM_007415	3827	6.81242	0.0781233	0.14114	145.311	163.305	138.885	114.895	176.999	217.492	136.196	120.734	85.3778	135.067	161.435	102.663	225.816	116.586	234.383	101.3	103.272	95.728	122.101	120.142	121.61
25185	Txnip	NM_001009935	2801	6.81046	0.0781909	0.141225	32.4348	28.6318	71.3604	67.9137	28.0766	26.2199	18.2238	62.5924	21.5515	37.9446	31.7809	46.1604	7.954	49.2962	43.3053	81.468	111.372	63.368	59.3889	72.4318	76.466
19254	Psmd9	NM_026000	2591	6.8078	0.0782827	0.141335	22.6183	39.5471	42.3427	18.1857	48.631	21.1013	23.858	29.2932	1.70114	11.1253	29.5707	38.5346	50.536	24.6532	76.9538	26.032	41.7318	14.5153	19.7057	18.6825	19.8393
24871	Trp53inp2	NM_178111	3934	6.8067	0.0783208	0.141369	397.997	268.456	408.715	356.116	506.337	468.787	427.472	378.075	270.601	336.709	341.22	204.534	259.614	460.191	455.552	294.832	424.284	341.754	373.745	358.222	350.745
6842	Eed	NM_021876	2060	6.79447	0.0787452	0.142004	27.4449	46.6484	30.8852	67.2901	15.6946	20.6778	22.5058	18.0988	27.7222	59.9704	55.0371	71.0571	13.8509	24.7131	24.387	37.6383	36.8025	90.759	52.9968	60.6976	64.707
22987	Stk3	NM_019635	2911	6.78818	0.0789646	0.142344	13.7715	11.9996	20.9756	43.436	8.94519	26.7428	8.36542	10.2157	2.89661	25.4632	11.5626	21.3481	3.08823	5.7745	29.508	26.4186	22.2012	48.3326	43.2425	43.9958	38.1732
25082	Ttf2	NM_001013026	4540	6.78551	0.0790576	0.142475	1.26742	10.1318	5.47726	6.64742	1.96318	0.395429	1.2378	2.15082	1.85727	0	1.07305	29.3225	0	0	8.94412	6.94234	6.02257	7.5092	6.89278	5.91601	6.2717
20324	Rnf168	NM_027355	4465	6.78028	0.0792408	0.142749	24.3584	19.0716	25.4384	47.64	16.4389	23.3201	17.5155	18.2908	35.4947	35.0904	30.8476	8.50916	17.858	16.3497	29.9647	32.7535	22.6856	55.6895	44.37	46.9336	43.5671
13086	Mak	NM_001145803	3562	6.77864	0.0792982	0.142779	2.94719	7.62701	1.32643	1.90008	1.47188	1.32873	7.49389	7.22722	0.161401	0	11.19	6.86282	4.82817	0.606747	0.292304	3.18545	1.22121	1.5192	2.70825	1.53363	1.83926
18120	Pid1	NM_001003948	2666	6.77874	0.0792947	0.142779	101.084	152.596	207.239	133.124	45.4275	50.3815	104.867	118.538	145.848	141.443	116.949	205.37	135.468	135.921	135.421	283.498	274.115	171.821	115.879	124.195	120.602
26879	Zfp599	NM_181419	3574	6.75669	0.0800707	0.143758	8.99422	24.8013	15.6447	11.1807	5.03649	15.6629	16.9029	12.4189	2.62737	1.3168	20.9418	49.1969	4.26514	7.9956	15.2944	11.8171	27.4718	11.5829	11.85	10.9965	10.2934
26834	Zfp512	NM_172993	3295	6.74673	0.0804239	0.144317	121.102	87.0826	116.866	93.8648	112.919	96.1889	168.276	115.442	132.198	101.588	73.9248	60.8709	126.452	107.788	155.546	97.9504	106.179	94.2682	93.5437	91.1384	96.5087
18682	Ppargc1a	NR_027710	6494	6.7451	0.0804816	0.144356	61.3968	70.09	74.7877	46.7086	68.3544	51.6956	27.0424	48.7321	86.3163	86.2401	81.9738	81.5901	46.706	76.582	114.396	43.3897	64.783	49.8725	49.5647	42.3873	45.0099
10458	Hdac4	NM_207225	3939	6.74223	0.0805838	0.144473	24.4439	15.6328	49.5493	25.2038	34.1182	52.0397	25.5611	20.0573	10.606	4.2813	17.0899	3.21515	26.5933	69.9256	67.0071	37.1273	24.1374	16.8977	28.1342	28.2762	27.5071
19192	Psen1	NM_008943	3023	6.7405	0.0806453	0.144548	75.9194	92.489	70.0346	68.8221	65.3837	96.6376	85.5121	77.964	90.9689	39.0501	96.1056	81.1569	100.205	55.5262	76.2894	80.2813	68.0416	54.8657	75.4197	72.9856	72.0175
8765	Glmp	NM_020003	1537	6.73026	0.0810106	0.145125	36.8372	13.1322	63.5254	23.682	54.5774	27.6077	15.539	38.4074	3.36643	81.5249	14.9835	0	24.413	55.1518	101.951	54.5468	42.4522	12.1466	29.698	25.6691	27.2143
23814	Tgfbr3	NM_011578	6051	6.72268	0.0812822	0.145536	0.431026	0.70751	2.8803	3.32881	0.519865	0.323657	0.0773926	0.366759	1.29848	0	2.12253	0	0	2.38113	0.387154	1.6668	7.08609	3.04061	3.49957	3.36038	3.41467
10063	Grem2	NM_011825	3745	6.72011	0.0813746	0.145655	3.22764	9.53538	2.48861	6.92215	3.12657	3.44276	2.3759	3.91111	3.78668	2.7228	7.68678	20.9194	0	3.7832	0.486536	3.02979	2.65493	7.08032	6.7225	6.88824	6.99752
17420	Pagr1a	NM_030240	1412	6.71191	0.0816697	0.146079	46.2843	65.1116	35.9293	31.2532	40.4723	35.0219	50.0805	45.894	89.7111	16.5263	19.1328	120.562	55.6397	23.2994	14.379	60.2685	45.7703	20.8867	35.8264	35.4642	32.8357
18087	Phtf2	NM_172992	4839	6.70828	0.0818007	0.146262	60.362	85.3761	53.1472	66.5037	61.8653	56.1552	51.0013	49.2557	94.2938	49.6009	134.538	35.9708	85.6197	47.541	39.8057	74.7735	50.4687	78.1683	61.8	62.4662	63.5803
11656	Jmy	NM_021310	4556	6.69983	0.0821064	0.146728	31.7471	22.0263	48.7235	61.2942	47.0275	31.774	16.0349	40.6247	30.7898	24.2319	30.7175	3.36154	31.9999	31.0976	49.6483	37.357	76.7909	56.24	62.1787	61.8833	64.8749
2029	Apbb2	NM_009686	3363	6.69146	0.0824099	0.147175	152.436	169.456	204.629	136.552	173.15	216.198	94.8303	105.849	118.584	206.006	152.366	193.984	162.017	216.502	226.163	156.701	219.151	109.982	151.051	139.742	145.432
8528	Gatad1	NM_026033	2547	6.68638	0.082595	0.147448	131.39	100.119	97.6876	102.355	110.195	131.55	143.23	136.449	175.912	91.0022	92.1573	154.488	53.7109	83.2512	86.8678	125.479	95.1526	98.2634	101.524	101.997	107.637
27051	Zfp934	NM_001162911	2235	6.68074	0.0828006	0.147777	2.3606	2.40699	2.24332	9.59551	0.625544	0.803242	2.30485	0.198591	5.23036	5.00105	3.36864	1.05422	2.79812	1.7191	0.815247	3.10246	3.33648	9.20058	9.36939	10.1163	9.6958
4511	Chchd2	NM_024166	910	6.67765	0.0829136	0.14796	346.253	544.194	248.947	400.426	103.32	85.3684	406.034	377.03	672.203	433.561	345.541	847.642	439.398	98.6936	104.691	451.646	340.756	498.324	359.654	370.188	373.537
12362	Lancl2	NM_133737	3657	6.67514	0.0830056	0.148048	169.062	125.013	246.505	226.108	223.505	201.093	112.049	167.127	132.893	177.701	115.896	150.765	108.377	262.726	287.629	201.848	233.818	229.285	215.085	228.135	231.927
11511	Irx1	NM_010573	2062	6.67291	0.0830873	0.148117	5.88462	5.8762	42.727	19.3446	0.339013	0	2.72533	9.90163	20.725	1.61668	0	0	17.6286	23.8739	113.864	22.6222	10.5479	20.6011	18.1429	18.4712	20.1631
27196	Zscan18	NM_001017955	3625	6.66815	0.0832618	0.148295	29.9983	45.1152	30.631	26.4175	33.9881	28.4988	21.1867	32.0797	36.107	28.1293	40.1949	56.8733	38.2775	27.7565	44.2325	9.56415	40.9708	28.811	27.8451	25.0325	23.9814
13494	Mepce	NM_144913	3166	6.65614	0.0837039	0.149005	12.4967	5.60362	19.1075	17.3018	9.93589	11.3923	16.5666	19.9074	12.4086	4.76918	6.85438	3.90712	6.04935	16.9901	13.1546	25.0871	21.1981	15.383	17.6874	18.309	17.8279
24711	Trerf1	NM_001097623	4545	6.65424	0.083774	0.149073	18.4339	31.7898	39.587	15.8042	26.1854	35.8367	12.5705	5.37114	18.2572	12.3826	8.76983	4.4713	82.1284	55.3187	46.7904	32.0383	24.2005	13.6327	17.7048	15.358	16.5213
13195	Mapk7	NM_011841	2926	6.63868	0.0843509	0.149899	43.1538	25.4002	54.8227	31.0782	45.4523	34.1914	25.2877	65.0759	49.7103	39.2053	9.68698	19.2255	47.2882	39.886	71.8796	64.1998	43.3252	24.2273	34.497	33.2945	32.2938
5063	Commd8	NM_178599	3464	6.6303	0.0846629	0.150325	24.3862	27.6395	34.9419	57.7958	19.7767	25.3946	28.6606	42.7963	8.6303	21.0586	43.0859	12.4135	27.419	27.4521	21.0401	48.0416	43.2339	61.0812	55.154	55.8088	59.1392
23330	Tada3	NM_133932	1849	6.62785	0.0847543	0.150411	86.2022	39.875	82.7563	52.2467	108.505	137.96	78.2615	67.4539	68.612	56.4207	83.8328	3.02646	32.7656	121.432	70.3885	75.6846	63.5199	35.8516	53.5728	57.2835	62.279
26956	Zfp715	NM_027264	4190	6.62796	0.0847503	0.150411	10.9601	11.696	21.0525	26.9348	11.3866	9.23136	9.05311	12.4999	5.94578	17.6437	16.8061	4.56896	13.7128	15.0157	32.3662	24.2216	12.6064	25.378	26.7857	28.3931	27.1823
23978	Tle1	NM_011599	4369	6.62338	0.0849216	0.150592	27.729	24.324	51.8982	51.8473	34.7603	16.0253	25.2963	34.2362	19.4313	36.6245	41.054	5.25813	26.6599	50.7316	46.4709	61.3195	49.0707	48.5527	53.9077	52.4452	52.4834
8767	Glo1	NM_025374	1939	6.60971	0.0854348	0.151289	48.76	67.5913	29.4478	51.6852	20.3693	28.365	49.7526	30.9025	93.6936	69.4772	87.479	19.7462	95.5486	17.7099	30.0704	32.8349	37.1762	49.9556	44.7762	53.9203	58.0888
18114	Pias4	NM_021501	1663	6.59623	0.0859436	0.15192	28.9314	17.5599	46.9698	10.9786	47.0794	37.4889	27.5969	20.2842	0.576178	40.563	12.2503	0.708412	39.7208	97.3255	42.261	32.5985	15.6943	4.23019	14.4313	10.8584	14.3944
4680	Cks2	NM_025415	694	6.59313	0.0860611	0.15207	1.77889	0.187734	5.54551	2.62158	0	2.11648	6.07309	1.91867	0	0.565111	0	0	0.563202	2.76815	11.252	7.26645	0.895417	2.72909	2.37322	2.84246	2.54156
20372	Rnf6	NM_028774	3322	6.59347	0.0860485	0.15207	19.3547	35.6893	16.5247	25.3126	12.7836	18.7179	16.0706	10.2879	42.8616	15.4065	59.0591	19.7708	28.2381	17.2043	12.9286	16.6984	19.2674	21.0135	25.3561	27.4984	27.3823
26832	Zfp51	NM_009558	2598	6.59251	0.0860847	0.15207	9.29839	4.76744	8.86902	24.4528	8.00485	9.36006	11.1758	7.51711	11.5808	8.1517	1.19328	12.3568	0.752237	8.50369	2.80535	17.4697	6.69736	31.1395	24.0903	22.0198	20.5617
13290	Mbd1	NM_013594	2672	6.57874	0.0866083	0.152684	26.1797	44.0174	54.2848	31.5495	14.062	34.5709	22.4337	31.2291	23.7395	31.0433	41.7683	53.1287	37.1553	119.08	20.7497	39.6337	37.6759	25.214	31.7004	33.1656	36.1181
21287	Sfrp4	NM_016687	1756	6.5702	0.0869349	0.153123	22.8803	4.38325	11.6438	9.24154	1.99045	3.06705	13.601	83.4117	12.8777	22.3341	5.04415	7.883	0.222587	10.2564	15.5644	16.154	4.60049	8.62864	10.8532	9.59201	7.89225
22615	Spen	NM_019763	12299	6.55973	0.0873362	0.153693	43.7711	38.6045	83.3046	67.3321	65.4627	77.1103	32.0985	21.0756	44.7657	22.1141	49.4046	14.6076	51.8014	104.829	124.762	49.7157	53.9113	57.0222	71.0129	69.7092	71.584
9807	Gnl3	NM_153547	1884	6.54473	0.0879151	0.154482	99.3958	93.9233	72.2773	71.8731	62.5208	64.4501	100.67	98.7121	92.7669	177.254	49.6003	92.5463	139.623	75.457	84.2787	51.8612	77.5125	73.387	72.9341	69.7506	71.4205
11890	Kdm1b	NM_172262	4281	6.54464	0.0879185	0.154482	29.4179	15.1343	27.117	40.8026	25.9631	38.8473	24.066	30.378	31.6933	25.5595	31.4493	6.46697	7.48673	17.1086	35.0224	31.8053	24.5316	43.1673	37.6482	42.606	39.7891
25296	Ube2v1	NM_023230	1950	6.53778	0.0881845	0.154871	30.5637	17.3414	31.9464	16.1206	42.6597	35.9049	29.2989	30.2729	8.94306	36.3025	20.2133	8.76015	23.0508	49.2588	36.842	18.1028	23.5821	9.99026	20.3916	17.4311	16.6693
10668	Hivep1	NM_007772	8753	6.51599	0.0890339	0.156165	121.653	97.0429	141.183	94.7661	169.59	186.399	91.0603	118.962	83.5032	80.4044	95.7298	48.0832	147.316	174.156	162.697	109.034	118.846	81.5758	99.674	98.2097	99.6051
20735	Rybp	NM_019743	4376	6.51162	0.0892056	0.156406	15.6819	29.2113	19.8844	14.9306	20.4474	25.1743	25.3628	11.7657	5.60547	5.73583	31.2726	43.1419	13.2193	16.5176	31.8828	12.6764	18.4608	13.7882	16.5605	14.4601	14.9137
14592	Mterf1b	NM_001042670	1368	6.50827	0.0893369	0.156577	1.75618	12.5575	1.7401	2.53015	3.96023	0	3.42327	0	0	3.15355	0	36.8153	0.857154	1.93093	0	2.30396	2.72552	2.17563	2.92389	2.99495	2.02614
5078	Cops2	NM_009939	3250	6.48489	0.0902602	0.157915	126.631	126.628	107.7	183.155	90.0155	102.944	137.465	148.315	109.027	172.019	122.779	91.9816	165.124	76.7699	102.437	132.473	119.121	215.873	173.027	170.747	172.973
27206	Zscan29	NM_178889	3635	6.47785	0.0905403	0.158285	2.46754	12.7415	9.03331	11.8778	5.5289	3.81633	0.644158	0.610524	0.10544	4.09989	22.418	0	15.8065	3.96374	15.8255	7.28344	9.06059	9.08101	11.5864	12.1479	14.6958
6220	Dicer1	NM_148948	9851	6.47159	0.0907896	0.158621	97.2718	57.7584	94.6422	130.152	114.266	121.604	80.7681	83.0841	106.255	77.6532	81.8677	12.8859	78.5216	59.9672	122.182	92.1454	104.274	119.093	134.662	132.258	134.596
18199	Pink1	NM_026880	2366	6.46573	0.0910238	0.158907	70.9478	66.8237	52.1033	52.1794	51.7045	43.8016	61.1604	79.7281	103.594	85.6977	55.5936	87.8837	56.9939	24.7647	59.6284	59.1466	64.8735	59.8089	52.8054	51.693	44.4103
27131	Zkscan5	NM_016683	3790	6.46638	0.0909979	0.158907	11.1089	2.84593	12.6284	15.1171	14.7556	18.6027	7.66089	13.3507	1.31466	10.9688	5.95955	0	2.57825	7.92008	14.0107	15.3017	13.281	13.4214	15.6444	16.7759	14.6267
1474	Aebp2	NM_001005605	6192	6.45066	0.0916289	0.159785	25.1618	31.0641	27.8258	50.4117	21.6194	22.4827	19.5882	38.2062	34.5702	14.5043	18.0241	41.334	33.8343	20.0114	19.001	37.6671	34.6237	49.5957	47.1943	52.1987	52.6582
26539	Zbtb9	NM_001005916	2784	6.42755	0.0925638	0.161091	12.3602	5.44268	25.0887	15.8157	7.53282	12.4865	2.69139	7.81204	4.40545	39.2328	5.24962	4.7606	6.31782	31.7422	23.3743	26.2652	18.9729	10.9822	17.748	18.1504	16.3822
26854	Zfp553	NM_146201	2641	6.42511	0.0926633	0.161203	41.3142	28.295	64.4083	32.2096	45.9898	72.4253	46.2806	44.7044	27.7188	10.7662	21.297	12.8247	50.7632	60.3752	68.1049	47.9755	81.1775	19.1581	38.2197	35.9681	35.4925
26846	Zfp526	NM_175436	3351	6.42458	0.092685	0.161221	9.04927	1.73645	9.16927	3.93504	26.3889	4.48069	5.3105	7.41739	10.5226	0.175554	2.64325	0	2.56609	18.6319	2.71871	8.46505	6.86139	2.98749	4.42349	3.44152	4.88767
19306	Ptges2	NM_133783	1952	6.42182	0.0927974	0.161376	20.6331	18.2341	20.6802	7.32891	27.396	22.7416	24.4707	35.6991	3.04341	10.4476	22.6884	5.58265	26.4313	17.469	3.33372	33.585	28.3332	4.43557	7.47327	8.62888	8.77792
19648	Rad54l2	NM_030730	9326	6.42106	0.0928284	0.161409	30.0442	31.8474	45.8878	58.5852	40.8513	33.9848	24.555	23.7964	33.8642	23.2133	57.176	21.7276	16.6387	44.6748	56.7986	36.5673	45.5104	56.7482	59.2382	60.5609	57.7934
2333	Arnt2	NM_007488	5990	6.41305	0.0931553	0.161876	168.728	180.735	261.61	183.965	232.558	250.719	134.315	143.974	112.391	138.411	167.243	143.967	230.994	307.528	281.155	222.469	235.289	175.351	192.197	181.535	186.775
21495	Sirt7	NM_153056	1715	6.41089	0.0932437	0.161989	25.7431	19.1935	47.1794	19.2236	23.9469	32.6408	28.1255	10.0934	35.8691	23.7828	10.0712	34.5184	12.9908	74.6315	40.6761	40.7991	32.6109	18.4587	19.07	21.1468	18.2188
23695	Tef	NM_153484	4149	6.40742	0.0933859	0.162195	10.8426	6.2688	19.3487	11.5551	6.06547	9.32258	13.0931	9.30708	10.3001	16.9674	4.69669	5.53694	8.57278	16.148	26.4751	22.7897	11.9821	9.19506	11.6254	13.6785	11.7213
26533	Zbtb7a	NM_010731	5373	6.39881	0.0937396	0.162769	8.45496	8.75715	26.2537	10.0457	6.50517	18.802	2.70191	7.26948	7.276	8.17513	3.95646	0.0548153	22.2602	22.6148	40.4518	13.8438	28.1044	7.10037	11.2542	10.9014	10.927
12631	Lmna	NM_001002011	3152	6.39414	0.0939321	0.162981	14.0386	17.5292	9.34089	4.11945	5.04546	11.0287	11.5887	42.6672	12.1597	1.74195	29.6469	0	22.9408	10.5136	9.00138	7.39958	10.449	2.48938	4.32953	4.86235	4.79653
25491	Usf2	NM_011680	2417	6.39056	0.0940798	0.163155	47.6202	51.8086	71.051	37.7073	41.8646	39.7038	43.5946	27.9129	59.4653	73.1802	57.5355	54.7127	43.1776	79.6813	44.5854	73.8077	86.1297	48.4719	34.9475	34.1534	33.2565
26905	Zfp64	NM_009564	2753	6.38115	0.0944695	0.163708	21.4096	9.9649	18.7396	9.42798	13.3943	27.1513	30.2789	16.9286	26.1734	14.5307	3.70002	22.7872	3.40744	29.3084	10.9678	10.3038	24.3782	8.25566	11.2815	9.20495	8.96979
23343	Taf1d	NR_028401	1289	6.38007	0.094514	0.163744	76.5145	117.333	68.3969	83.6988	43.5209	53.4307	100.636	71.6222	123.397	66.4801	124.033	132.752	95.2139	41.9168	55.5327	80.2015	95.9368	97.1867	84.3311	79.5802	73.6972
13415	Med12	NM_021521	8447	6.37785	0.0946061	0.163862	26.9823	25.7304	49.9011	35.4165	32.8544	31.0874	10.3673	21.3334	33.0776	33.1736	20.0807	26.9871	30.1233	44.633	60.2439	44.7755	49.9519	28.7002	37.0466	39.198	36.7213
2474	Asxl1	NM_001039939	6674	6.36099	0.0953091	0.164874	36.3023	23.5456	50.3237	45.5019	41.1111	52.8201	23.5765	39.9692	30.8962	29.4405	26.8752	12.3122	31.4494	31.6992	58.3074	60.5429	50.7452	42.1625	47.5229	46.1098	46.2123
3684	Cbx8	NM_013926	1393	6.34983	0.0957766	0.165476	8.11252	0.775244	11.12	3.04481	2.50914	28.7043	7.39602	9.24026	0.825428	0	0	2.32573	0	20.5142	9.52989	11.3131	3.12271	1.35965	3.71596	3.48586	3.61777
10456	Hdac2	NM_008229	2004	6.33904	0.0962312	0.16622	614.089	776.627	574.142	978.888	392.341	371.933	802.471	601.547	789.403	726.838	751.609	1106.66	471.609	434.859	569.431	708.688	583.589	1331.52	843.231	895.471	845.333
11370	Ing3	NM_023626	3755	6.33207	0.0965258	0.166583	19.4256	8.42011	31.0074	22.1928	33.556	22.3835	9.22887	22.5767	3.01107	25.7977	6.95865	12.7849	5.51683	26.7316	29.1144	35.0855	33.0982	21.0403	21.6176	21.62	24.4932
8034	Fgf9	NM_013518	4138	6.33129	0.0965588	0.166598	12.7721	11.0863	4.77097	11.6647	13.2613	5.71885	13.9201	11.1553	3.14918	29.4283	18.5156	1.7082	13.035	2.55341	5.47265	6.70276	4.35504	14.1235	11.5995	10.1578	10.7782
20775	Safb2	NM_001029979	3272	6.31183	0.0973861	0.167775	30.3815	46.5442	58.9662	33.8371	48.978	45.6892	19.7512	12.2086	21.2019	34.4602	29.3717	83.622	26.6388	63.0433	83.7691	38.7235	50.3289	29.1904	33.2221	35.4316	37.5041
11902	Kdm4c	NM_144787	4257	6.30763	0.0975659	0.168022	22.0676	32.588	42.0241	56.6801	13.7937	14.7217	35.2025	15.5353	27.9555	25.1969	11.3398	59.4303	26.994	36.3844	18.9551	66.1905	46.5663	58.474	53.7784	55.7499	58.7179
20360	Rnf4	NM_011278	2936	6.30238	0.0977907	0.168305	137.683	171.329	196.812	136.186	145.416	142.303	130.155	178.689	81.1977	148.339	164.721	215.074	134.192	279.723	241.501	132.256	133.766	130.769	129.985	139.805	144.184
3160	Brca2	NM_001081001	10727	6.28951	0.0983436	0.16913	5.40381	5.50136	6.89514	16.5453	4.9201	4.73166	9.73539	0.579278	5.96688	6.48953	12.3033	0.302018	3.89878	5.12644	3.25159	10.1075	9.09508	17.9589	17.1086	15.023	16.0907
10980	Hsph1	NM_013559	3478	6.28216	0.0986611	0.169592	277.257	196.713	205.34	298.227	226.667	291.309	154.036	213.503	420.907	357.118	189.35	212.551	188.239	240.413	223.026	154.057	203.864	286.44	290.355	313.348	302.765
27037	Zfp874a	NM_177712	3239	6.27522	0.0989614	0.170024	3.5119	6.29043	0.960807	2.81311	8.95659	0.352711	1.01208	2.74067	7.04069	0.968663	0.820395	8.63835	9.41255	1.7052	0	1.94617	0.191855	2.33898	2.17926	3.46683	3.26739
21520	Skil	NM_011386	6717	6.27156	0.0991201	0.170191	66.1599	79.0953	77.6899	119.432	56.9008	67.692	84.7783	93.6997	52.6381	41.2506	82.6809	98.3934	56.2115	48.6923	67.6221	96.38	98.0653	113.231	114.544	119.258	130.697
27054	Zfp935	NM_178875	2471	6.26458	0.099424	0.17067	14.9794	10.6331	8.99377	37.0008	1.55595	7.33131	10.9921	10.2386	54.5207	5.23763	16.6684	1.31111	13.9198	8.06611	2.21215	20.9186	4.77822	40.6238	37.8022	36.2318	33.3455
18260	Pkia	NM_008862	3682	6.2617	0.0995492	0.170864	460.432	463.332	382.09	572.23	389.677	436.6	402.42	592.846	341.636	599.412	547.522	347.476	495	360.597	305.612	396.845	465.305	560.392	604.706	535.761	588.063
3649	Cbfa2t2	NM_009823	6077	6.25279	0.0999387	0.171384	44.3112	31.0058	66.6093	63.1455	56.6529	60.7752	26.278	31.5524	49.9511	40.6579	29.2968	40.7592	22.9616	72.8669	72.2166	55.8065	65.5471	60.3739	66.0911	65.372	60.7451
14647	Mtpn	NM_008098	4042	6.25109	0.100013	0.17149	322.101	342.974	261.964	459.888	182.544	220.58	290.111	256.845	520.767	461.756	384.257	354.855	289.811	220.472	262.744	278.377	286.265	541.474	448.862	426.55	422.665
15254	Nfyc	NM_008692	1944	6.2328	0.100817	0.172655	10.79	26.0054	18.1276	23.5211	8.72009	7.6397	12.0448	13.2425	13.3081	9.78451	23.693	29.3916	24.9315	15.1938	6.15928	23.3468	27.8104	27.4188	22.5121	22.6367	21.5166
27049	Zfp932	NM_145563	2075	6.19432	0.102529	0.175067	7.21857	11.233	12.3868	26.4267	3.20045	7.39335	14.2183	7.27274	4.89482	6.3317	8.53738	3.12265	22.039	3.58759	4.2651	25.8222	15.8724	28.2957	26.4202	23.1821	27.8087
26681	Zfp184	NM_183014	2703	6.19114	0.102672	0.175241	12.8782	20.6365	29.1642	40.2941	10.9266	20.5892	10.7417	18.227	8.22415	8.56051	17.3677	0.871691	43.6701	25.675	21.2821	35.2146	34.485	44.7446	40.4768	35.0308	40.9243
3487	Calr	NM_007591	1943	6.1886	0.102786	0.175398	303.417	278.857	312.657	215.08	444.594	360.175	265.363	296.053	214.42	239.894	174.37	423.821	238.38	318.864	522.871	236.508	172.386	140.925	249.819	236.402	233.174
2359	Arrb2	NM_145429	1728	6.18422	0.102984	0.17567	90.7195	68.3873	80.7304	52.6102	108.72	44.8623	75.3404	111.733	84.5066	119.154	67.4054	13.124	124.633	79.7677	88.2719	93.3873	61.4946	50.1055	53.7839	51.7229	54.8285
4512	Chchd3	NM_025336	1432	6.16119	0.104026	0.177034	77.4014	122.497	86.7039	76.6326	62.7286	55.6171	69.3297	79.3477	44.5636	152.822	108.554	155.488	103.447	61.5435	57.6215	110.05	117.601	71.2323	83.7965	76.1898	75.3119
5445	Ctnnd2	NM_008729	5946	6.15692	0.104221	0.177299	177.493	127.625	198.012	172.018	200.097	190.624	153.187	195.948	156.217	168.886	135.783	96.8863	150.205	212.513	167.84	178.847	232.849	177.012	173.913	165.857	171.291
1061	Abhd14b	NM_029631	1475	6.14381	0.104819	0.178082	20.9734	13.4823	9.03504	6.24986	17.4169	28.8788	53.0214	18.9577	6.23632	1.32945	8.10689	2.39611	29.944	17.9085	7.23537	2.99156	8.00473	7.15404	7.33778	5.04098	5.46664
4373	Cenpu	NM_027973	2467	6.12743	0.105572	0.179071	4.3804	14.3696	11.7827	17.518	5.10045	1.58772	0.759307	2.15898	0.699121	15.9768	14.5411	10.5059	18.0617	5.35368	17.1984	10.2207	14.3579	18.4255	18.121	17.5917	15.9338
2493	Atf1	NM_007497	2329	6.12682	0.1056	0.179088	29.3851	64.6162	38.6838	42.2012	19.2845	29.1511	14.2763	23.2503	57.6803	32.6682	60.4701	53.9979	79.3808	47.3262	40.0113	30.0431	37.3545	87.8276	30.0045	27.495	23.4776
15543	Nol11	NM_133702	3158	6.11809	0.106004	0.179627	57.2099	27.7049	58.0338	60.3553	59.9324	40.3618	67.3241	56.5004	35.4996	83.6409	17.1092	34.3205	31.6848	39.2371	72.039	72.0587	48.8005	59.8029	61.0198	61.7931	58.8055
11480	Irak1bp1	NM_022986	1893	6.10946	0.106405	0.180173	56.3165	45.7674	46.4287	22.5695	53.4531	62.5918	90.7909	67.9962	0.809876	62.2569	37.9007	73.5917	25.8097	48.205	48.9517	40.9587	47.5995	29.301	22.3728	22.3648	16.2395
24682	Trappc2	NM_025432	765	6.10013	0.106839	0.180799	28.8042	6.16484	17.5444	23.8142	16.6766	12.1603	38.5661	28.4297	18.0364	58.9563	5.21031	0	13.2842	13.184	15.9921	27.1922	13.8093	19.8064	26.1431	26.58	22.7274
2421	Ascc2	NM_029291	2604	6.08949	0.107337	0.181463	16.6727	14.1211	47.522	22.7666	26.5095	26.0726	8.45247	26.2493	11.8485	0.903657	28.0625	0.791727	13.5091	40.2995	53.0789	54.709	42.0007	13.4038	28.7333	22.3187	26.6106
23120	Sumo1	NM_009460	1215	6.0897	0.107327	0.181463	84.2471	92.7613	58.2003	140.31	44.5893	42.3122	79.014	74.8885	166.874	97.8047	91.4914	147.867	38.9254	36.1688	42.4187	90.7932	63.4206	172.14	122.001	142.252	124.848
5251	Crem	NM_001110856	2780	6.06957	0.108274	0.182736	3.27636	5.80701	10.4431	14.6257	5.0291	0.939305	4.88517	5.4284	0.413605	2.96257	12.7447	0.31783	4.35854	3.54159	4.30707	12.0177	21.9062	17.0323	12.1029	14.9561	14.4117
6840	Edrf1	NM_178115	5338	6.06977	0.108265	0.182736	23.9536	36.4373	41.1068	43.7282	28.4503	28.1893	26.6699	26.1089	20.8582	13.4452	38.8285	24.939	45.5445	25.6422	55.7848	49.0073	33.993	42.8309	42.7114	44.4316	44.9387
7257	Ercc6	NM_001081221	8422	6.05662	0.108888	0.183592	21.7662	29.6088	22.3206	40.5506	19.3188	20.4441	12.2886	26.6142	20.6154	31.3163	38.5979	40.1113	10.1173	23.6658	17.6169	23.5769	24.4229	45.3948	39.3915	40.1071	37.309
3932	Ccnk	NM_009832	2632	6.04661	0.109364	0.184284	53.9673	82.042	86.9591	76.3666	48.2718	53.8227	68.3238	57.6737	52.3507	43.3611	94.7339	93.7727	57.6195	95.2519	86.5348	88.136	77.9136	65.792	80.1873	80.8878	78.5995
18661	Pou5f2	NM_029315	1395	6.03261	0.110035	0.185258	0.301485	1.48155	0.730572	4.13768	0.125277	0	0	0	0.137374	1.54626	4.44464	0	0	0.688564	0	0.451874	1.78185	3.49122	4.55395	4.35108	4.15448
26710	Zfp263	NM_148924	3242	6.03258	0.110036	0.185258	12.0548	12.9094	26.4635	30.7374	3.50385	14.196	18.4894	10.5418	20.275	5.32271	6.96691	17.8966	13.8646	23.7767	17.0213	32.471	32.5852	31.2131	29.6831	29.4876	32.5659
13413	Med10	NM_138596	862	6.02899	0.110208	0.18548	106.531	130.604	73.0485	95.4452	60.4163	64.5622	142.881	153.443	60.9148	156.966	80.1494	178.353	133.31	41.23	47.409	119.93	83.6249	82.8659	94.4426	102.454	102.019
26524	Zbtb45	NM_001024699	2140	6.02181	0.110554	0.185904	28.8465	15.8219	26.9744	13.6144	46.4669	41.64	12.4735	22.8148	18.895	30.7885	12.6241	10.1844	24.6572	41.7434	47.6805	12.6662	5.80766	14.0342	14.733	12.2671	13.4231
26532	Zbtb6	NM_146253	4533	6.0045	0.111392	0.186966	27.5585	24.6111	32.9364	54.3367	24.9439	20.522	27.1704	34.1725	40.3735	18.1688	20.5171	29.1729	24.1433	23.3091	19.9256	44.9168	43.594	51.989	56.006	54.5983	54.7537
10208	Gtf2h3	NM_181410	2664	5.99003	0.112096	0.18804	13.7309	24.7549	30.0027	40.8951	12.005	4.47219	16.1726	13.9953	23.5949	12.1454	22.9418	40.9059	10.4171	7.84231	57.5506	35.2569	19.361	45.1965	37.3598	41.5815	39.4425
13029	Mad2l2	NM_027985	1224	5.98268	0.112456	0.188529	95.0065	101.43	177.797	108.1	116.508	80.1354	64.2768	89.2054	119.303	100.61	102.759	75.0743	126.455	94.3675	308.358	163.771	144.693	97.7057	103.419	114.552	116.725
23570	Tceb3	NM_013736	4592	5.9614	0.113504	0.190056	29.5313	48.6319	39.0034	53.2924	27.9725	32.2357	43.1385	40.2095	22.8278	10.8039	59.4103	33.0312	53.4542	42.0972	31.5168	46.6733	35.7262	42.8952	58.3095	57.2014	54.7635
19218	Psma6	NM_011968	997	5.95827	0.113658	0.190292	443.551	429.388	338.184	402.613	222.615	342.451	556.609	591.653	399.035	548.944	413.115	486.538	388.51	261.814	221.657	555.125	314.138	439.37	369.097	400.135	401.851
26812	Zfp451	NM_133817	3650	5.9535	0.113894	0.190572	28.8892	21.6617	53.6877	39.5756	39.7881	32.1937	20.0151	19.2133	31.502	30.6228	24.6312	13.4754	26.8785	22.6321	112.819	33.3316	45.968	34.1733	42.9319	44.6085	36.5886
5504	Cul3	NM_016716	2764	5.95041	0.114048	0.190783	280.132	301.816	302.755	468.313	249.307	314.953	236.354	254.363	368.991	256.823	324.306	206.4	374.741	300.953	366.148	242.202	301.717	553.375	429.204	446.338	444.335
10774	Hnrnpk	NM_025279	1978	5.94328	0.114403	0.191307	279.74	398.495	339.986	416.186	271.772	236.473	239.833	257.829	324.659	347.873	392.723	326.536	476.227	349.765	401.762	301.479	306.94	358.388	425.849	446.87	433.637
2649	Atxn1	NM_009124	5431	5.93891	0.11462	0.191555	8.87602	10.9005	18.5305	24.2825	12.0991	18.3608	6.46708	8.82636	3.42272	4.08002	3.58803	4.28416	24.8292	20.4278	14.618	28.3205	10.7556	22.2693	24.7375	24.4198	25.7035
27118	Zik1	NM_009577	4191	5.93394	0.114869	0.191864	29.6265	13.856	32.5043	39.6167	14.2611	31.3869	47.1543	23.0875	43.6682	18.201	14.2659	14.8983	12.4039	21.5441	17.7009	64.6759	26.0964	40.027	42.2743	36.2433	39.9221
19008	Prmt2	NM_001077638	2052	5.90865	0.11614	0.193511	137.694	136.815	118.854	116.702	141.035	140.457	170.707	136.703	144.662	92.5998	120	175.967	114.478	78.7583	137.886	138.545	120.226	102.98	120.396	120.389	123.042
13371	Mcrs1	NM_016766	1915	5.90344	0.116404	0.193834	26.5668	24.1999	27.2113	14.7407	23.0886	43.5495	28.6117	21.5552	13.3095	29.286	20.3515	21.2241	31.0241	23.0732	35.4765	22.7129	27.5826	10.4554	15.9725	16.4818	16.0529
22079	Smad2	NM_010754	2512	5.89851	0.116654	0.194063	117.338	72.5174	132.239	167.628	139.211	152.744	135.905	152.309	75.068	48.7892	99.0831	29.3115	89.1577	135.651	133.982	161.606	97.7153	144.656	178.807	173.913	173.135
21499	Siva1	NM_013929	782	5.89508	0.116828	0.194283	14.0016	8.62753	37.9634	24.9241	12.2914	11.4786	12.5759	14.7572	29.8973	3.00911	9.62775	2.25976	13.9951	46.9833	50.2619	40.3046	14.3038	15.2239	30.6897	27.3605	26.4222
26851	Zfp54	NM_011760	2536	5.88451	0.117366	0.194972	4.84439	2.00695	1.47921	7.76293	3.58343	5.40582	2.03128	7.00081	0.528966	10.5161	1.39709	0	4.62376	1.60975	0.102641	2.73423	1.47024	8.21524	9.2779	7.0008	6.55779
17495	Park2	NM_016694	3201	5.88082	0.117555	0.195233	11.1495	7.11195	3.73062	5.2735	16.8701	1.52956	10.0946	0.415981	20.834	17.1528	2.76711	14.9055	3.66319	3.37587	4.87904	4.72626	1.94133	5.32517	4.9983	4.78792	5.98261
7028	Elf1	NM_007920	4217	5.87942	0.117626	0.195306	2.67925	1.76932	3.41377	14.0624	1.53336	0.425716	1.33261	7.15719	0	5.62659	0	5.30797	0	1.93613	2.22212	4.63393	4.8629	15.5913	12.9444	13.1341	14.5797
19426	Purb	NM_011221	1136	5.87172	0.118021	0.19589	8.74269	1.03221	8.42144	9.99159	12.6148	15.6596	9.89372	10.5493	2.53042	1.20832	0	0	3.09662	17.968	2.97875	11.098	1.64107	8.81256	13.4628	9.48399	8.20703
21244	Sesn2	NM_144907	2655	5.86134	0.118555	0.196564	6.32773	0.922487	4.00007	3.70518	19.0888	7.00764	4.93879	5.68397	0.360898	0.886299	1.00085	0	1.76661	4.6128	3.82357	5.22336	2.34056	2.44583	4.51965	4.3437	3.51156
27198	Zscan20	NM_177758	5372	5.84497	0.119401	0.197802	4.59916	9.63512	3.72097	5.60884	2.63508	3.70642	8.45595	3.47017	7.02764	2.29968	3.13278	22.8622	2.91037	3.62083	2.13199	7.62727	1.50381	4.9863	5.73765	6.12964	5.58179
10211	Gtf2i	NM_001080746	4441	5.84346	0.11948	0.197909	150.179	157.779	197.314	259.62	145.366	167.651	143.939	152.714	126.133	165.273	177.909	172.827	122.601	137.128	203.736	221.429	226.963	213.543	279.844	268.601	276.489
8240	Foxp3	NM_054039	3739	5.83981	0.119669	0.198095	13.138	17.4115	11.4194	8.6288	3.92617	20.1659	14.2783	7.35993	17.8362	15.2616	17.1749	19.6926	15.3669	13.2303	6.89205	8.93536	16.6199	7.74296	8.24356	9.90252	8.62615
14908	Nacc1	NM_025788	4303	5.83831	0.119747	0.198122	76.7397	62.2722	76.7323	47.9503	83.4208	109.574	29.1669	58.073	36.6083	143.595	35.5084	87.5422	63.766	114.125	56.318	51.8589	84.6274	42.0662	52.8754	48.8416	48.0181
15028	Ncoa5	NM_144892	3091	5.83822	0.119752	0.198122	60.1365	71.0698	75.9648	53.0556	77.7408	64.2046	58.6325	65.91	62.9283	31.4029	67.6279	61.7439	83.8375	59.1991	80.0848	79.5348	85.0406	39.6532	59.3738	56.9469	56.2487
4635	Churc1	NM_206534	639	5.82981	0.12019	0.198658	156.342	127.971	85.1397	93.4897	80.1331	50.5703	260.168	202.129	47.3844	297.669	94.2586	234.604	55.051	62.0072	50.9188	142.054	85.5789	59.2797	103.468	109.474	101.738
23560	Tceal3	NM_001029978	1115	5.80324	0.121586	0.200509	16.4777	39.4377	24.6569	23.9093	16.4573	23.1267	13.0201	22.2921	12.8904	11.0797	22.6403	50.4518	45.2208	32.5208	12.8397	22.614	30.653	18.4424	23.0012	25.0411	29.1526
11696	Kat8	NM_026370	1503	5.79442	0.122052	0.201159	35.3491	30.1053	73.0991	44.7489	23.6038	20.7399	61.0694	33.3701	22.9505	50.3607	48.6192	18.8118	22.8848	59.4351	82.7823	65.0076	85.1713	37.8041	48.6856	44.7256	47.7803
18052	Phf5a	NM_026737	1648	5.79386	0.122082	0.201181	128.406	133.338	110.243	97.0136	67.9745	80.0176	90.3642	121.467	246.291	164.324	133.293	156.197	110.523	88.157	101.244	137.318	114.254	93.2546	89.0894	99.9042	105.806
20226	Rlim	NM_011276	7435	5.79361	0.122095	0.201181	67.1213	62.5396	99.081	122.954	84.3132	62.6037	83.1418	86.263	47.4775	38.9286	67.3697	18.42	101.829	90.4672	128.275	86.479	91.1025	117.326	121.552	126.559	126.379
12031	Klf9	NM_010638	3263	5.79233	0.122163	0.201245	1.63377	8.39373	2.61657	3.51118	0.642702	0.100033	2.00927	3.94474	0.822224	2.28365	0	24.8218	0.359358	0.367969	0.877494	5.60238	3.61844	4.31187	3.60539	3.1158	3.01169
26670	Zfp146	NM_011980	2030	5.79039	0.122266	0.201367	34.4649	16.9796	29.69	52.7001	31.4226	22.5913	62.7479	31.0477	47.4844	11.4951	12.2173	14.6536	24.0679	28.7454	32.1845	41.2997	16.5304	37.9864	54.1277	59.7258	58.9604
15032	Ncor1	NM_011308	8740	5.7853	0.122536	0.201644	128.096	132.262	180.094	238.053	137.27	125.428	95.0001	98.2668	147.411	165.199	219.563	53.7487	123.475	150.759	220.925	171.439	177.254	239.209	241.237	237.981	233.786
26352	Wwc2	NM_133791	5027	5.77732	0.122961	0.202272	8.84605	3.37157	13.7177	12.906	19.6072	9.02542	10.8994	5.29761	6.0232	2.22346	6.34317	0.117176	3.65437	22.1172	8.95789	13.0412	10.7546	11.0876	14.7435	13.3119	12.4811
10199	Gtf2b	NM_145546	1252	5.77392	0.123143	0.202522	68.8912	62.2517	75.4939	141.599	79.1451	45.3635	84.1598	60.2673	114.339	30.0719	59.0738	65.8676	61.8137	41.6212	69.6481	112.781	77.9256	129.018	133.806	151.623	151.952
4929	Cnot3	NM_146176	2904	5.76131	0.123819	0.203416	32.0051	22.2813	57.1849	45.2491	57.652	57.8858	14.836	19.1052	16.9596	25.5921	25.621	15.1115	26.1113	45.3978	59.8754	75.1054	48.3612	39.132	50.3956	46.3488	45.12
21254	Setd6	NM_001035123	1669	5.73927	0.125008	0.204932	68.4499	86.1536	35.5849	62.9292	35.8109	37.2563	14.8712	31.1148	150.186	141.46	172.48	57.1751	28.8053	45.1785	31.036	41.9236	24.2015	71.1684	54.8393	67.7347	57.9746
20001	Rere	NM_001085492	7458	5.73798	0.125078	0.205015	104.794	121.905	188.589	173.841	148.798	150.709	54.4407	57.728	95.5101	121.579	170.429	72.7026	122.583	225.712	232.096	141.236	155.313	155.637	180.393	179.252	180.081
11653	Jmjd6	NM_033398	1668	5.71597	0.126277	0.206646	33.1341	57.0332	62.6976	64.8522	34.156	27.9835	40.1483	28.4725	46.5306	21.5139	65.3163	59.1517	46.6316	83.2129	75.5297	54.4199	37.6279	53.0433	68.9782	68.0482	69.3393
10457	Hdac3	NM_010411	2005	5.70922	0.126647	0.207056	94.4839	147.147	100.261	104.541	159.334	84.4104	74.7416	66.1903	91.5652	90.6627	86.8082	225.776	128.858	102.882	30.5086	99.978	167.675	97.2971	105.85	106.561	108.457
26738	Zfp316	NM_017467	6893	5.69733	0.127301	0.207928	12.7136	23.8053	16.0494	15.3869	10.6992	10.5362	7.26946	11.7193	11.6489	24.4086	19.7891	14.6556	36.9712	20.4846	9.59167	22.1309	11.9903	12.4431	16.5893	16.6868	15.8286
14577	Mta3	NM_054082	2115	5.68759	0.127839	0.208636	39.7925	13.1968	63.2422	37.2678	51.4782	52.3951	67.533	52.2548	4.80225	10.2914	31.8285	0	7.7618	78.5696	62.6435	48.8793	62.8765	34.0291	37.0453	34.8688	43.1281
15733	Nr3c2	NM_001083906	4087	5.67885	0.128324	0.209254	0.36485	0.590782	2.79848	2.09004	0.128281	0.199663	0	0.325802	0	1.53535	0.433449	0	1.3389	3.34911	0.445823	7.09488	0.304096	1.65506	2.59064	2.26483	1.84961
26985	Zfp780b	NM_001081021	5511	5.67409	0.128589	0.209637	17.816	11.9618	10.2445	27.0991	11.0673	5.06404	29.9965	11.4366	17.7345	31.597	13.4205	18.9187	3.5462	7.27687	2.69224	15.8992	15.1098	27.4939	28.0074	25.6899	27.205
11187	Igsf1	NM_177591	4414	5.67191	0.128711	0.20981	1.15285	3.71041	1.07483	3.11141	1.86085	1.2941	0.106095	1.70944	0.347326	1.59931	2.80937	4.3371	3.98478	1.74091	0	1.71372	0.844703	2.75841	3.94456	3.05963	2.68305
17748	Pde2a	NM_001008548	4198	5.66764	0.128949	0.21005	3.8023	11.5956	18.2907	14.6577	2.53941	3.84879	1.22709	14.6964	0.502145	0	9.60023	5.26183	19.9248	22.1374	0.434035	18.4695	32.122	11.7303	16.7022	14.8924	15.306
14756	Mycbp2	NM_207215	15233	5.66376	0.129165	0.210304	225.375	145.782	203.533	238.348	312.96	306.459	159.77	191.637	194.92	186.503	196.072	94.4297	146.846	231.467	210.589	183.444	188.633	210.871	249.065	248.361	245.097
18647	Pou2f1	NM_198934	2682	5.65886	0.12944	0.210676	88.11	73.15	129.449	73.5997	129.8	73.0829	79.9712	65.7006	93.3176	86.7871	94.1237	14.2759	111.05	120.337	182.072	91.4287	123.96	66.7849	77.1132	74.118	76.3826
26911	Zfp65	NM_145622	3958	5.64832	0.130032	0.211516	15.1861	19.9914	14.7212	42.9409	3.88555	2.47404	34.9038	16.4846	22.3205	11.0482	22.6026	9.22708	28.1444	4.429	1.57835	30.8971	21.9805	46.0064	45.179	43.3992	37.1792
11900	Kdm4b	NM_172132	4610	5.64533	0.1302	0.21174	22.3236	17.0926	26.5905	14.5241	18.4618	23.4363	34.2338	20.6039	7.89827	29.3077	19.1177	14.6942	17.4659	40.5784	30.0386	20.6475	15.0974	9.80154	17.2	16.2277	14.8672
15016	Ncl	NM_010880	8257	5.63367	0.130859	0.212394	220.363	252.091	209.654	344.733	184.201	209.001	184.326	172.445	290.995	281.209	272.205	242.837	241.23	210.123	299.86	157.267	171.366	372.873	344.311	339.306	322.441
25002	Tspyl2	NM_029836	2758	5.62465	0.13137	0.213042	88.7724	77.3316	75.8882	64.0725	108.735	137.818	88.9741	34.6004	89.8428	72.6641	108.551	46.7733	76.6702	86.8951	78.4288	71.3102	66.9186	47.9726	67.3956	70.7551	70.1665
19932	Rcor2	NM_054048	2014	5.61814	0.131741	0.213468	47.0962	32.921	96.3759	45.0831	39.4818	27.2277	59.7586	19.6141	8.84917	127.646	35.1838	4.38713	59.1921	106.118	114.122	78.5608	86.7025	36.1386	46.4967	50.0288	47.6681
1268	Acvr2b	NM_007397	1701	5.61318	0.132024	0.213802	30.0064	15.1398	69.8078	39.8064	54.6579	6.90811	29.7335	16.9608	66.2449	5.53351	25.2552	0.173147	19.9912	107.01	32.9005	60.7759	78.5451	26.2457	43.4334	44.0691	45.4775
11493	Irf3	NM_016849	2019	5.59229	0.133222	0.215464	40.6101	34.1256	40.7814	17.9012	16.9654	57.3923	9.27791	25.9408	10.251	123.833	45.6257	37.1982	19.5528	56.2579	57.4999	30.285	19.0827	14.7413	21.3262	18.564	16.9733
22953	Stat5b	NM_011489	5255	5.58952	0.133381	0.215671	6.1923	9.13033	19.933	9.46452	7.71544	5.71448	10.8721	11.8248	0.765818	0.261209	3.87675	18.1589	5.3553	26.3214	24.618	12.3554	16.4372	9.21636	9.98461	9.06709	9.59003
17501	Parp10	NM_001163575	3289	5.56943	0.134544	0.217273	1.83622	1.47096	0.269334	0.491116	0.21254	0.79394	3.13246	0.2699	0.407862	6.20059	0.134654	0	4.27821	0.365061	0.712274	0	0	0.246795	0.429226	0.369094	0.919348
11399	Inpp5k	NM_008916	2641	5.56691	0.134691	0.217459	35.1151	32.1701	62.3167	32.4894	41.9533	43.999	45.2167	36.6375	20.5351	22.3492	27.5016	8.92154	60.0871	98.4734	40.1139	56.0907	54.5889	27.2516	33.1416	34.072	35.4925
7362	Etv6	NM_007961	5530	5.56284	0.134928	0.217791	16.0724	9.3063	21.4929	23.6377	18.045	22.2524	13.9729	16.9354	12.9953	12.2337	18.3397	4.20746	5.37171	19.0633	26.6886	15.1607	25.0591	20.1092	25.4008	23.1595	25.8813
3677	Cbx3	NM_007624	1803	5.56232	0.134958	0.217814	26.564	11.3664	28.6804	32.0146	42.3576	24.983	22.3372	22.648	24.8714	22.187	16.9487	5.22724	11.9231	39.0239	28.1519	23.0749	24.4708	25.0611	28.318	36.5263	38.1531
3919	Ccnd3	NM_001081636	2118	5.55412	0.135437	0.21846	9.39547	7.30915	29.5646	13.7736	0.990149	2.00345	20.1207	3.14342	22.801	7.31416	7.10945	11.6808	3.13723	17.0069	49.7734	30.0599	21.4181	7.53711	14.6638	15.7619	17.1316
12726	Lrch4	NM_146164	3081	5.55279	0.135515	0.21856	17.634	26.3969	37.5744	14.269	39.7623	36.8679	5.92788	11.813	9.20554	2.22761	44.417	9.65491	25.1187	53.9353	22.7263	58.1056	15.5304	9.22097	16.8008	15.7605	15.2937
11221	Ikbkg	NM_010547	6814	5.54495	0.135974	0.219123	10.3503	20.5737	16.4809	21.7336	19.7741	8.1674	9.41554	9.31475	10.9121	4.51815	25.8031	8.2124	27.7057	11.524	29.567	8.32592	16.5067	24.7777	20.6489	20.6883	20.8194
18917	Prickle1	NM_001033217	4085	5.54064	0.136228	0.21948	15.652	9.06962	15.8166	29.5489	17.8826	25.3696	16.0495	21.9481	2.53327	10.1287	14.6361	3.10024	9.47255	26.8648	9.30314	12.1906	14.908	28.6797	32.4276	28.5286	28.5596
20724	Rwdd3	NM_025637	1694	5.53815	0.136374	0.219691	16.2464	2.4345	10.3025	10.0734	10.2133	2.98662	25.7097	40.3501	3.05443	15.1643	0.522877	6.78062	0	11.1988	5.99266	12.2798	11.7387	9.74306	10.2782	11.645	8.62734
26962	Zfp74	NM_178384	3711	5.52967	0.136875	0.22042	36.2932	34.7138	30.1505	59.2375	42.4777	22.2091	27.5101	39.7086	32.3784	53.4753	44.2757	25.6348	34.2307	37.0138	13.3971	37.37	32.8209	66.9315	57.2527	54.7112	58.0547
14763	Mydgf	NM_080837	913	5.5226	0.137293	0.220965	54.8816	21.3489	55.0522	31.5699	52.2561	67.7485	75.4003	77.7834	7.34643	48.7549	33.9555	3.54846	26.5427	36.0337	36.2078	66.9719	80.9955	17.7811	40.7179	29.418	38.3625
11336	Ilf2	NM_026374	1973	5.51751	0.137595	0.221296	282.892	310.631	269.776	257.512	210.28	281.078	223.114	296.276	345.102	341.499	396.636	270.19	265.065	372.072	249.347	225.244	232.442	278.112	233.856	264.187	253.894
8119	Flcn	NM_146018	2851	5.51457	0.13777	0.221475	28.731	45.4373	38.7099	22.5368	25.5001	28.1071	25.7887	21.3285	15.1239	56.5377	14.136	107.644	14.5322	29.059	68.6577	31.8388	25.284	25.6239	24.1807	20.5448	19.7976
3678	Cbx4	NM_007625	5197	5.50361	0.138423	0.222318	18.4148	16.282	20.5457	10.2753	29.0204	19.4702	20.455	27.6713	2.21247	11.6592	22.4975	13.4878	12.8608	23.3807	25.6941	15.8895	17.2185	12.0265	9.32639	9.37267	10.3758
26815	Zfp456	NM_001001186	4079	5.49954	0.138666	0.222534	0.876535	3.26407	0.623126	2.75334	3.08478	0.0400108	0.574041	0.761696	0.798683	0	0.977173	4.98212	3.83292	0.176615	0	2.16355	0.152346	3.71461	2.24962	2.26928	2.77985
26715	Zfp273	NM_198322	2321	5.48807	0.139354	0.223399	9.44165	7.16635	2.71864	12.3188	5.04481	2.39076	5.44773	7.84054	35.5036	0.422433	6.67845	9.26331	5.55728	2.17272	0.336446	4.61706	3.74833	15.8541	11.5566	11.7682	10.0965
3675	Cbx1	NM_007622	1274	5.47824	0.139946	0.224065	74.5298	65.6282	136.733	135.109	91.9074	123.108	44.8453	54.3491	47.0819	85.8872	54.5774	88.3105	53.9967	186.606	169.172	99.4531	91.7009	148.665	130.018	141.501	120.253
7217	Epm2aip1	NM_175266	7247	5.46529	0.140729	0.225082	132.136	86.5638	114.049	160.958	93.2768	93.6166	132.342	155.137	184.259	134.184	133.957	83.7196	42.0149	95.1998	87.3163	148.915	124.764	154.382	162.594	155.994	170.86
26968	Zfp750	NM_178763	3242	5.4541	0.14141	0.225936	0.223081	0.409818	1.53081	1.80616	0.646865	0.402725	0.288897	0	0	0	1.22945	0	0	0.370353	4.97791	0.583311	0.191678	1.25186	2.03209	2.15306	1.78763
13102	Mamld1	NM_001081354	3352	5.44662	0.141867	0.226431	39.8616	40.8913	32.3224	27.9073	39.8844	41.6774	44.7067	39.5917	49.9674	23.3417	14.1372	69.9403	38.5965	46.5659	34.2455	19.5578	28.9205	26.3143	30.9552	27.2976	27.0621
13441	Med31	NM_026068	1161	5.44727	0.141826	0.226431	41.2161	83.872	50.4575	61.339	34.1695	31.3476	37.1093	71.4903	41.5956	31.5844	87.3547	138.002	26.2595	17.1674	51.7903	84.7001	48.1721	61.2918	56.9473	64.8277	62.2891
18111	Pias3	NM_001165949	2938	5.43609	0.142512	0.22725	9.34585	19.0939	10.1896	7.58194	11.7777	5.94379	14.8237	12.6901	10.3059	0.533951	8.74297	17.142	31.3967	6.70225	10.6316	11.1569	12.2676	3.86791	8.96944	7.79895	9.69146
26975	Zfp768	NM_146202	2247	5.43634	0.142496	0.22725	30.2137	46.9512	36.2282	27.8088	45.5764	28.9076	31.4703	35.1604	21.492	18.6756	65.6333	25.2972	49.9232	31.3129	39.1546	42.6415	31.8039	22.2765	30.157	29.3088	29.4927
27153	Zmym6	NM_177462	4134	5.4221	0.143373	0.228282	24.8408	20.6784	31.9992	53.6944	30.7756	18.1601	32.6249	14.9239	46.7735	5.78699	30.6393	16.4573	14.9386	19.111	19.8339	46.8123	42.2397	53.7998	51.9636	54.9493	54.0649
13650	Mina	NM_025910	2147	5.41048	0.144092	0.229139	3.69293	1.52612	5.93941	10.9771	5.94205	6.91736	4.14427	3.10096	2.05293	0	3.71299	0.137179	0.728202	4.58575	2.78846	12.3313	4.05211	13.3583	10.6301	10.5309	9.38903
20524	Rprd1a	NM_144861	4297	5.41101	0.144059	0.229139	14.0239	9.29929	31.6679	29.7847	16.1869	18.8386	20.4889	18.3862	3.03265	7.21033	13.7078	0	14.19	27.4394	18.1123	40.0487	41.0713	25.2498	28.528	31.9944	33.3664
17413	Paf1	NM_019458	1953	5.40809	0.144241	0.229319	125.49	169.262	125.554	116.412	104.427	148.079	73.1348	69.9981	248.058	109.242	207.492	169.807	130.488	131.442	157.537	93.2797	119.957	108.062	113.487	123.85	120.248
3183	Brf2	NM_025686	1383	5.39821	0.144855	0.230008	10.5105	1.28092	4.46013	4.20277	8.71911	3.89424	41.3109	0	3.32559	5.81333	3.84275	0	0	1.04181	2.25854	11.3949	3.14529	2.93459	5.44411	4.05967	4.37272
13401	Me2	NM_145494	2455	5.39386	0.145126	0.230359	73.3723	69.9285	49.3685	70.3481	63.9961	108.426	101.291	73.4027	48.7874	44.3307	68.3708	75.82	65.5948	27.7796	76.1275	47.2452	46.3217	73.8418	66.9923	74.0485	66.5099
17893	Per3	NM_011067	5953	5.38745	0.145528	0.23092	1.47417	0.424572	2.93657	4.48702	0.352282	4.4413	0.0786667	0.0745593	3.76642	0.131761	0.223187	0	1.05053	6.1315	2.05509	0.741231	2.81847	4.40874	3.55718	4.94512	5.03702
26739	Zfp317	NM_172918	4024	5.38632	0.145598	0.231001	14.2059	13.6881	25.7809	33.9514	21.1937	26.1192	13.267	14.3391	6.90541	3.41117	10.8958	22.6894	7.47922	16.1722	22.3814	33.9933	30.5768	33.3505	34.1471	34.9946	33.3132
26865	Zfp57	NR_033137	2694	5.36933	0.146667	0.232298	198.844	171.984	295.62	216.247	210.959	216.697	166.878	201.825	175.205	221.497	141.05	85.1644	289.737	257.786	270.345	337.411	316.938	170.035	221.925	232.46	240.567
23358	Taf9b	NM_001001176	2581	5.36698	0.146815	0.232473	42.1087	51.5715	28.1819	51.0619	30.0636	27.949	49.1709	38.521	50.1181	56.8299	24.5375	100.647	29.5305	10.7927	41.5507	30.5291	29.8551	57.2379	52.7824	46.9753	47.252
15239	Nfkbie	NM_008690	2421	5.35225	0.147747	0.233715	3.0775	11.8375	2.57208	2.80562	0.505299	2.49424	0.193434	14.3	0	0.971963	21.403	13.6252	0.48434	2.08297	0.215032	2.34336	5.64694	2.23519	2.33247	3.94873	2.70608
14181	Mkl2	NM_001122667	8280	5.34654	0.148111	0.23405	33.8445	25.9755	24.9441	38.5275	30.9631	41.0179	24.9422	26.749	25.0193	54.3757	34.3925	22.4805	21.0537	20.5624	29.6449	23.6767	25.8925	35.4551	40.3228	39.7136	38.6184
26155	Wbp5	NM_011712	1018	5.34458	0.148236	0.234194	135.768	151.908	168.218	342.799	45.3212	38.7971	155.488	148.241	136.668	290.095	228.834	56.4164	170.474	78.5516	51.3945	318.897	224.028	366.518	330.743	331.362	342.571
19233	Psmc2	NM_011188	1782	5.33857	0.148619	0.234611	210.021	265.118	190.575	210.572	198.2	201.212	195.52	182.821	210.241	272.132	126.998	405.588	262.768	131.119	313.028	155.999	162.155	235.648	197.789	208.627	200.225
7040	Ell	NM_007924	3085	5.33493	0.148852	0.234872	17.6553	12.3049	30.8184	13.841	20.6768	17.2462	8.95619	11.0783	3.41654	44.5581	17.6576	6.58737	12.6698	40.9439	35.9437	18.1856	28.2006	10.1738	14.9486	14.5595	15.6823
25670	Vipas39	NM_001142580	2552	5.33102	0.149102	0.235052	54.4082	45.4045	89.0229	55.3863	48.1415	66.8933	58.7213	44.0025	21.4015	87.2893	45.2942	28.7367	62.1826	97.5791	88.4315	76.8195	93.2616	45.2716	59.1907	59.2229	57.8601
21016	Sec14l2	NM_144520	2528	5.32321	0.149603	0.235789	2.12673	0.271406	4.55856	2.48687	0.207391	10.5876	1.11148	0.702296	0.151612	0	0.350377	0	0.46384	3.89462	10.3995	0.498706	3.44141	1.92652	2.60603	3.42144	1.9935
2708	Axin1	NM_009733	3779	5.31317	0.15025	0.236647	11.4241	12.9706	27.1841	15.897	25.065	18.0954	8.3028	6.69477	6.33888	4.04745	16.4072	7.40398	15.1008	47.5953	23.1436	24.0202	13.9774	11.1693	17.6824	17.2664	17.4698
10347	H2afj	NM_177688	1827	5.31118	0.150378	0.236795	33.3033	34.6133	31.4337	20.3371	18.844	46.6298	43.0623	36.6839	29.055	25.5448	31.5128	14.9921	57.335	28.9163	32.7686	31.3975	32.6526	14.9576	22.2796	23.8372	20.2741
24650	Traf3	NM_011632	6975	5.30627	0.150696	0.237214	26.3164	24.5106	39.664	54.2849	39.0363	40.1283	19.0678	32.3264	21.2106	6.1288	45.3353	8.02283	20.1735	40.5909	33.4001	39.5842	45.0808	49.6917	54.9848	54.0839	58.3794
26804	Zfp442	NM_001177550	2757	5.30312	0.1509	0.237428	6.12552	1.78314	3.91075	9.37758	2.21859	5.26847	11.5504	2.25387	14.1104	1.35139	1.44573	1.06827	2.83542	0.696806	1.32178	7.08788	6.53651	11.3841	9.64363	8.53112	7.95143
23563	Tceal7	NM_001127169	971	5.30094	0.151041	0.237542	3.19821	3.23162	0.324595	1.19552	1.07988	2.52118	9.64578	5.9424	0	0	0	7.27965	2.41521	0	0	1.29838	0	0.27865	1.6962	1.25021	1.55702
18818	Ppp2r5d	NM_009358	2925	5.29348	0.151526	0.238169	91.3692	88.9189	107.963	69.1976	114.416	107.408	89.4978	67.9813	50.317	118.595	82.9731	66.8591	116.925	105.989	188.748	80.8159	56.2996	48.0088	81.325	72.6814	74.775
19468	Pycard	NM_023258	2135	5.29151	0.151654	0.238343	2.47693	7.77155	10.9534	5.86107	2.45566	6.8798	0.219346	3.94996	0.897597	0.459236	8.29746	1.1036	13.9136	7.08601	4.63292	25.9822	6.11232	3.80191	6.6123	6.53885	6.49124
5872	Dbp	NM_016974	1678	5.2878	0.151896	0.238619	5.86542	18.5904	5.53567	6.49669	4.16594	3.69592	10.3261	5.55475	0.114206	11.3356	12.6687	2.10624	40.9963	3.86394	1.86148	8.64027	7.777	6.93355	6.45008	5.24502	7.35812
7823	Fbn1	NM_007993	9900	5.27094	0.153	0.240076	1.01594	1.88068	3.67841	4.43334	1.85353	1.91229	1.22989	0.941503	0	0.158459	2.81831	0.178498	2.64523	8.41692	1.02541	4.32978	0.941545	3.30696	3.92146	5.05813	5.4468
26906	Zfp641	NM_173769	3673	5.26858	0.153154	0.240237	34.1017	34.7894	22.7871	23.0038	28.2149	40.4789	14.2799	48.6992	59.2702	13.6673	14.228	75.4548	14.6853	30.5973	24.9454	17.3337	18.2721	17.3111	27.6093	24.0444	23.0505
24936	Tsc22d1	NM_207652	4588	5.26063	0.153678	0.240922	370.492	434.616	408.454	374.538	340.228	357.143	375.316	396.448	420.741	333.077	397.218	486.463	420.168	376.378	335.753	361.621	560.063	417.944	360.521	365.006	354.68
12681	Loxl3	NM_013586	4049	5.25974	0.153736	0.240986	11.7216	10.6173	6.88013	7.92486	11.222	6.73132	15.3826	10.085	13.2996	13.6089	13.6724	6.69204	11.4874	5.81215	2.57147	7.47283	11.6641	5.07861	8.77461	9.63156	8.21464
23562	Tceal6	NM_025355	1114	5.25942	0.153757	0.240992	29.7337	19.5103	40.5828	15.5675	42.2	19.3384	26.9043	40.6399	44.0387	5.2808	21.8655	18.7712	17.8941	88.8118	23.5996	19.2391	30.6805	11.6583	14.9959	15.9372	19.6787
15732	Nr3c1	NM_008173	6329	5.2578	0.153864	0.241105	4.39474	1.21119	5.30726	8.7384	1.5187	1.72771	0.739932	3.57662	13.3834	5.42209	1.53947	2.09409	0	2.20065	1.85074	6.57356	10.6041	9.06316	9.3312	7.84014	8.7191
26875	Zfp593	NM_024215	1976	5.24472	0.15473	0.242215	3.86884	9.59035	3.63555	2.508	3.62612	2.14742	3.79192	3.81856	8.34047	1.48856	1.79302	26.978	0	1.09374	3.02977	2.87109	7.54761	2.32777	3.33403	2.45739	1.91279
19793	Rbbp4	NM_009030	4407	5.23844	0.155147	0.242731	54.37	51.8457	87.9204	85.1716	54.3675	62.3265	51.1127	72.5148	43.0933	42.8051	60.7988	22.4551	72.2833	80.863	82.6311	85.3931	102.794	94.0578	83.9283	83.5676	79.1326
7039	Elk4	NM_007923	3671	5.23733	0.155221	0.242791	20.5079	11.3345	36.5585	34.4472	26.088	35.2994	22.452	23.456	7.1518	8.60013	14.5977	0.240688	19.1651	33.7539	37.7221	43.2721	31.4857	29.187	36.2129	37.657	34.7319
6894	Egf	NM_010113	4757	5.23085	0.155653	0.243412	1.13588	0.0547771	1.00586	2.30724	1.76341	0	0.39378	0	0	4.6581	0	0	0.164331	1.91827	0	1.0601	1.04506	2.10449	2.12684	2.13724	2.86038
21250	Setd2	NM_001081340	8350	5.22175	0.156261	0.24417	102.463	93.3259	126.675	174.997	118.482	111.096	90.5198	84.1989	101.441	109.037	108.412	29.1701	142.396	124.526	122.978	124.789	134.405	171.35	174.451	177.895	176.294
24744	Trim26	NM_001025599	3203	5.21403	0.156779	0.244758	53.9446	39.8042	55.0486	34.4058	62.8551	50.7497	42.6926	39.6321	48.7618	78.9762	53.372	17.8387	48.2019	33.4377	110.848	58.2541	17.6551	27.6229	36.6558	36.7634	36.5813
13410	Med1	NM_001080118	6518	5.18432	0.158787	0.247225	72.9164	60.778	116.713	99.3165	110.332	107.192	51.2273	57.4051	62.1835	49.1588	78.8182	34.974	68.5418	159.711	153.75	59.7676	93.6229	85.3469	106.02	103.762	102.137
15244	Nfrkb	NM_172766	5159	5.18369	0.15883	0.247254	29.3806	28.5842	55.0605	34.6271	35.1962	34.7983	25.4167	27.7031	46.0612	7.10787	28.4148	21.123	36.2148	52.4587	72.9073	65.0036	29.8725	26.1182	36.9874	37.208	38.1948
19978	Rela	NM_009045	2709	5.17677	0.159301	0.247802	25.9891	13.147	31.2408	16.2085	36.707	2.47005	47.0204	28.181	18.3926	23.1635	14.3865	4.56624	20.4882	28.9866	25.8471	43.9789	26.1505	10.3873	20.1501	18.2048	16.0916
15755	Nrde2	NM_183155	3708	5.17411	0.159483	0.248056	4.57429	12.4855	11.4535	6.28682	4.80735	7.13028	4.67292	9.69578	1.03364	0.105768	10.3911	5.87774	21.1875	16.579	14.3907	6.80005	8.04427	3.50252	6.78958	7.44805	7.40712
12737	Lrif1	NM_001039488	3359	5.17302	0.159558	0.248145	21.2971	29.1424	15.2572	31.9543	8.4285	12.8756	18.4031	13.7423	39.4228	34.9104	13.4485	43.8408	30.1379	8.57887	15.8859	21.3937	15.1701	36.6505	33.4824	27.828	29.8563
13634	Mid2	NM_011845	5916	5.16706	0.159965	0.248722	29.0898	36.8324	24.4083	28.0501	24.43	22.9247	37.917	29.9352	29.9311	29.4008	22.3834	20.063	68.0507	28.4949	19.1835	19.0729	30.8819	29.4992	29.7092	25.0085	27.9834
13489	Men1	NM_008583	2980	5.1663	0.160017	0.248775	51.0956	27.0387	46.9227	32.9294	62.398	63.1458	69.6168	64.9393	21.9289	24.5446	44.7335	3.85449	32.5281	42.7089	39.2192	76.1514	29.6113	22.9712	39.083	33.8114	35.8519
10230	Gtf3c3	NM_001033194	3005	5.16575	0.160055	0.248806	23.7687	31.8993	21.9375	42.5579	23.3791	31.0115	17.9217	35.449	19.4507	15.4004	20.0437	24.7967	50.8576	13.1856	14.0326	24.9628	35.5688	41.8685	40.7936	43.882	43.6874
7412	Exosc9	NM_019393	1617	5.1511	0.161062	0.250147	64.902	107.221	73.7019	92.2705	49.0672	46.8316	74.1407	82.0727	103.344	33.9556	101.065	135.513	85.0857	45.8889	74.8534	79.5265	94.5388	105.417	88.7603	93.5613	81.3435
3915	Ccnc	NM_016746	3388	5.14069	0.16178	0.251038	24.3158	16.5406	23.1771	46.5866	21.2004	17.7752	25.9861	26.3324	21.4941	33.1067	18.3007	24.5146	6.80663	15.168	4.30242	42.6073	30.6308	57.2604	46.3908	42.2357	40.4593
15150	Nelfcd	NM_020580	2279	5.13749	0.162002	0.251325	43.4158	69.9246	78.201	49.6413	72.5424	44.7576	41.9192	37.1986	41.7918	22.2853	42.7525	22.0989	144.923	63.2216	108.048	58.9151	82.6196	37.6352	51.6208	55.4641	53.8452
26954	Zfp711	NM_177747	4330	5.13184	0.162394	0.251792	88.5006	64.0512	72.7791	114.546	89.5198	82.5821	80.7903	91.9479	68.6883	117.475	96.7578	25.167	70.2288	63.6668	36.1891	77.7401	113.52	132.223	111.666	112.108	102.188
20809	Sap130	NM_172965	4015	5.105	0.164268	0.253845	137.383	84.4822	127.531	108.427	161.224	225.681	79.314	102.257	67.3474	188.475	138.875	70.8614	43.7104	154.668	146.453	102.209	106.794	96.5694	114.919	120.11	102.109
14733	Mxd4	NM_010753	1179	5.10009	0.164613	0.254237	8.75117	26.2048	38.1791	10.0004	27.274	16.6111	2.78042	3.38818	1.78796	0.665288	0.375638	0	78.2387	22.4046	34.4413	33.1489	62.7217	4.13083	11.9739	12.3557	11.541
19918	Rcbtb1	NM_027764	3903	5.09773	0.164779	0.254465	92.9911	71.1991	94.1456	148.817	70.8806	52.4779	72.7111	78.0123	131.833	152.032	91.0036	62.7077	59.8861	68.5402	77.8289	133.728	96.4848	191.61	126.837	144.474	132.348
7289	Ern1	NM_023913	3976	5.09109	0.165248	0.255037	7.21979	3.805	16.5336	11.6242	6.85683	12.6426	8.83368	6.47469	0.91577	7.59518	6.79464	0	4.62035	8.8783	16.7595	12.2078	28.289	10.5479	10.8294	13.2051	11.9145
11627	Jade1	NM_001130185	5558	5.09091	0.16526	0.255037	13.2775	17.5632	21.1878	29.3179	19.5891	16.385	6.31931	13.0169	16.2398	8.11471	23.2674	13.2477	16.1746	26.053	10.2095	29.0344	19.4543	28.4298	29.0405	30.4689	29.3324
26658	Zfp12	NM_177681	4271	5.07171	0.166621	0.256712	18.8132	16.9129	35.1758	30.9534	22.3822	14.8645	29.3854	22.5511	17.5439	6.15232	15.0356	17.3086	18.3946	29.0121	40.1628	37.0455	34.4829	28.8244	32.9436	29.9509	32.0946
3198	Brpf1	NM_030178	4430	5.06881	0.166827	0.256882	26.0679	22.7944	47.3664	30.9178	22.1312	33.5619	30.8678	7.31403	23.4463	39.0859	29.0919	15.5572	23.7341	45.7507	63.9284	37.4234	42.3631	26.4462	31.23	31.7532	34.2417
26771	Zfp382	NM_001081007	2193	5.06601	0.167027	0.257133	15.6786	5.05648	18.07	13.7253	25.4213	16.6702	13.8804	3.6431	6.37916	28.0772	4.4429	6.98366	3.74287	20.1483	23.5015	20.696	7.93422	12.3379	15.879	13.7005	12.9838
11368	Ing1	NM_011919	2813	5.06095	0.167388	0.257603	38.9318	65.3208	61.4135	44.4563	40.7549	29.4731	36.2922	37.7108	45.3034	44.0566	74.4688	85.645	35.8487	36.3663	142.039	37.6471	29.6019	37.2238	44.5817	47.2008	48.8191
26154	Wbp4	NM_018765	3452	5.05232	0.168006	0.258381	37.9368	45.546	33.7723	60.8444	40.7034	33.8512	40.5627	40.5021	52.517	19.4844	70.9475	34.2131	31.4773	23.5824	34.9877	38.8956	37.6236	62.7828	61.5483	61.4536	57.5929
18043	Phf20	NM_172674	5733	5.03313	0.169387	0.259929	37.0579	43.9069	35.7422	63.7172	39.9333	21.0944	39.8625	44.5167	58.1964	18.744	44.5735	61.8533	25.2939	36.1064	33.78	32.3264	40.7559	65.554	64.5163	62.3862	62.4121
13641	Mier2	NM_027422	2562	5.013	0.170848	0.261646	17.5259	10.8173	17.584	8.9693	23.8745	24.4615	24.6764	11.9538	4.03919	16.1498	9.5075	12.8753	10.0691	26.9943	11.2775	20.4216	11.6425	5.49165	10.8368	9.7135	9.83521
26351	Wwc1	NM_170779	3315	4.99539	0.172135	0.263183	14.9611	6.13843	23.9866	17.1593	10.1746	14.0311	1.97775	13.1214	40.5241	9.93778	2.27116	4.35342	11.7907	11.7352	28.4246	21.1072	34.6795	15.5894	20.0154	15.9297	17.1026
13436	Med26	NM_027485	3037	4.99508	0.172158	0.263189	17.0882	6.51328	18.1898	12.7674	19.5074	20.4207	18.1955	18.5608	18.6778	7.16707	5.54143	0.48489	13.5135	14.549	28.8838	19.0957	10.2308	10.0673	12.7057	14.6897	13.607
2260	Arid1a	NM_001080819	8175	4.99028	0.17251	0.263595	181.45	160.87	289.968	234.877	254.457	234.515	162.23	139.101	158.865	139.532	206.784	53.7886	222.038	313.603	359.926	214.517	271.828	216.522	250.196	233.973	238.817
9840	Gon4l	NM_027389	7535	4.98954	0.172565	0.263607	28.4266	16.4266	24.4017	30.5805	26.6027	21.0747	20.8204	18.5552	34.9194	48.5875	26.6255	10.8272	11.827	23.201	19.2416	28.4438	26.7206	26.1772	31.8505	32.9265	31.3677
23884	Thrap3	NM_146153	4327	4.98967	0.172555	0.263607	31.6006	51.3661	37.2151	50.2804	27.2219	23.8753	29.3298	23.3876	25.2888	60.5003	37.3584	69.7679	46.9721	29.1916	52.9376	37.0031	29.7282	47.5232	53.5609	48.5005	51.537
11637	Jak2	NM_008413	5030	4.97857	0.173373	0.264492	50.6392	48.989	60.0979	94.8983	44.6805	41.1093	50.3681	49.3266	37.1844	81.1664	54.8533	15.1067	77.0069	48.0274	44.4005	66.7961	81.1675	93.6504	91.1213	96.0844	98.7373
26920	Zfp661	NM_028141	2989	4.97606	0.173558	0.264745	5.61517	5.48523	3.25105	15.0788	2.22179	4.80494	3.29018	4.90033	18.0802	0.393631	1.03718	4.43409	10.9844	3.05293	0.0870849	6.53774	3.32643	13.5783	18.3412	14.5703	13.8255
11558	Itga8	NM_001001309	5782	4.9726	0.173814	0.265043	0.162963	0.50764	0.766021	1.78676	0	0.790335	0	0.153529	0	0.0339145	1.45532	0	0.0675998	1.32902	0	1.09022	0.644849	1.49744	1.54634	1.83709	2.26615
21097	Senp1	NM_144851	3751	4.969	0.174082	0.265368	30.5147	50.8593	39.6356	51.6827	24.0873	36.0694	31.5864	33.842	47.3089	10.1941	49.9432	43.6562	58.9784	28.4886	36.5012	43.1894	50.363	50.4207	49.3031	53.6019	53.4051
6779	Ebf4	NM_001110513	2670	4.94471	0.175891	0.267302	22.2981	22.5999	17.7402	14.2115	13.3526	22.3718	12.453	13.9639	42.4903	29.157	20.4022	24.2678	23.1297	10.7927	22.715	15.1099	22.3432	11.2484	15.1571	14.2082	16.2323
10720	Hmgn2	NM_016957	1254	4.93439	0.176665	0.268243	3.31377	2.02936	10.4911	8.20707	4.45962	2.2125	9.33618	2.47764	0.458462	0.938247	1.41268	0	4.67539	17.8092	16.1907	2.51341	5.45105	5.6099	8.2557	9.31761	9.64509
2500	Atf6	NM_001081304	7463	4.9186	0.177856	0.269873	18.4784	16.4019	20.1169	34.7711	17.3989	17.6916	19.5152	18.6152	15.9462	21.7035	6.94313	19.0613	23.2014	16.539	8.30103	29.7318	25.896	33.0281	34.8691	34.8911	36.2959
20789	Samd4	NM_001037221	7120	4.91677	0.177994	0.269994	3.4152	2.87306	6.21441	13.2916	2.40542	1.97129	9.9317	5.85983	0.322984	0	2.92348	0.0413655	5.65433	10.2868	4.20423	4.78085	5.58579	12.6544	13.9785	12.9792	13.5544
11137	Ifrd1	NM_013562	1815	4.90948	0.178547	0.270536	130.985	126.807	90.3082	129.022	61.4313	96.7536	158.681	131.81	184.14	153.093	166.658	74.6448	139.117	64.3011	37.5745	133.019	126.338	166.665	106.949	119.054	123.421
19312	Ptgis	NM_008968	1751	4.90559	0.178843	0.270895	0.357202	3.86866	6.83554	3.40366	1.79652	0.0932063	0	0.253484	0	0	0	11.606	0	0	0	1.08001	26.2622	3.3995	3.89682	4.15974	2.15858
17938	Pfdn5	NM_027044	678	4.89551	0.17961	0.271909	322.978	440.084	327.353	333.623	226.571	198.589	456.561	433.377	295.37	327.401	307.009	474.798	538.444	256.075	153.183	459.292	440.86	251.813	326.21	368.841	387.63
19979	Relb	NM_009046	2200	4.89178	0.179895	0.272162	3.82707	1.00654	5.49618	1.10079	1.42987	0.741837	4.2573	11.0963	0	5.43714	3.01961	0	0	2.07391	7.45395	2.0057	10.4511	1.10688	1.06949	1.31052	0.916284
2357	Arrb1	NM_177231	7112	4.88691	0.180268	0.272517	64.1562	51.2896	63.9839	45.4711	119.571	66.1124	42.5371	52.361	63.0527	41.3032	58.0373	14.3286	81.5029	90.9967	48.1651	52.0281	64.7458	34.8103	49.0954	48.4121	49.5665
21486	Sirt2	NM_022432	1863	4.86568	0.181901	0.274364	191.378	189.158	212.378	155.997	272.32	233.725	122.92	140.803	194.826	183.673	140.732	146.866	279.877	295.563	196.305	169.518	188.127	104.858	177.318	168.686	173.125
27021	Zfp85	NM_001001130	2218	4.86537	0.181925	0.274364	5.60071	2.99502	3.32508	11.5609	0.315169	1.76596	8.23436	6.20351	10.4545	6.63076	3.59413	3.45247	1.93845	1.08267	2.34713	4.54726	5.32325	15.4925	12.1993	9.23599	9.31569
3273	Bzw1	NM_025824	2833	4.86138	0.182234	0.27471	171.281	168.11	178.698	269.924	205.297	142.292	201.669	238.298	130.283	109.848	148.042	159.685	196.604	157.407	170.254	199.367	187.764	240.008	278.724	275.099	285.866
5097	Coq7	NM_009940	871	4.86088	0.182272	0.274738	105.667	141.864	81.1872	81.3758	39.9282	51.5283	116.672	97.8409	96.3685	231.665	70.1687	146.754	208.669	84.9164	49.0111	23.1592	167.662	86.048	74.8274	83.6246	81.0032
26914	Zfp653	NM_177318	2108	4.86001	0.182339	0.274809	16.7095	8.64749	32.3513	14.2989	18.8192	12.6971	26.4364	22.74	6.72729	12.8372	23.1103	0.978016	1.85419	45.7946	3.82789	34.0899	45.6926	10.3966	16.5192	16.7725	13.5074
13447	Med7	NM_025426	2560	4.84179	0.183755	0.276431	18.4143	12.8069	26.7253	45.3815	18.0905	20.3368	18.2931	28.6076	1.87145	23.2861	6.57395	27.2663	4.58042	13.2263	18.4038	35.7042	39.567	48.8294	43.9326	43.0929	45.671
11382	Ino80c	NM_172625	2360	4.8377	0.184075	0.276741	41.1233	70.8257	43.0252	54.049	35.6187	17.6344	85.1279	52.8484	14.048	41.4622	77.8787	104.456	30.1428	45.1783	28.4562	54.7562	43.71	59.617	52.84	52.596	51.143
5240	Crebzf	NM_145151	4939	4.83544	0.184251	0.276907	30.2633	38.4062	37.7934	62.5046	24.3442	21.4786	25.1266	30.5547	44.6209	35.4549	23.4934	60.2283	31.4969	23.4351	16.5485	50.7967	60.3931	69.9569	60.6441	59.5731	59.8441
2655	Atxn3	NM_029705	5358	4.83275	0.184461	0.277132	15.0217	12.113	20.6549	32.2553	15.6235	7.95004	17.2183	8.94661	13.1263	27.2657	16.7794	1.97887	17.5808	9.90486	20.2583	18.7062	33.7501	31.6119	29.8611	32.3709	35.1772
11149	Ift57	NM_028680	2540	4.81892	0.185547	0.278367	28.9006	19.7666	39.3964	71.6904	35.7091	68.1088	23.0464	40.7155	1.88619	3.93731	27.549	2.66694	29.0838	24.6755	69.1733	43.4306	20.3062	69.2402	68.4557	70.7939	78.2719
20337	Rnf2	NM_011277	3028	4.81727	0.185677	0.278445	88.8721	102.746	121.215	171.326	109.774	95.8852	110.889	133.536	28.0367	55.1109	120.226	76.7431	111.269	80.3364	120.864	161.755	121.903	222.854	163.256	158.559	140.635
12453	Ldb3	NM_001039074	4954	4.81623	0.185759	0.278508	1.70969	2.39836	0.915083	0.982157	0.493875	2.50374	2.26873	2.23986	0.812349	1.93956	0.357591	2.73477	4.10271	0.969467	0.420342	0.890705	1.37982	0.764629	0.902395	0.888287	1.37332
22530	Spag8	NM_001007463	1247	4.79959	0.187074	0.280146	1.03676	0.118385	4.32173	2.59058	0	2.22492	0	0	3.99564	0	0.355154	0	0	4.81429	0	1.01101	11.4616	0.433953	4.33971	3.16387	2.42481
10413	Hax1	NM_011826	1117	4.7958	0.187375	0.280504	6.41637	11.0529	3.84899	12.2159	9.07445	2.33775	7.54651	5.56304	2.91659	11.0599	3.96488	13.4473	15.7465	2.57981	3.26245	6.77204	2.78165	7.75132	13.9024	13.4491	13.7607
17388	Pabpc1l	NM_001114079	2354	4.7841	0.188307	0.281535	1.51856	2.57122	9.37702	1.52492	1.1136	2.77322	4.5756	0.565656	0	0.0833023	7.71365	0	0	1.22415	3.53844	0.803353	31.9421	0.919523	2.19895	1.48263	1.49859
6759	Eaf1	NM_028932	4237	4.78142	0.188521	0.281825	17.5726	7.51982	20.2179	17.0057	20.582	20.1453	3.20528	13.304	36.9524	11.2463	10.3481	2.43292	9.77847	15.756	21.8706	19.1921	24.0531	16.8587	17.2703	18.1935	15.7003
24822	Trip4	NM_019797	7161	4.77443	0.18908	0.282503	12.4192	20.1189	19.7904	26.1235	8.27316	9.41256	12.7523	18.4086	6.63678	19.0316	17.6879	11.5572	31.1118	17.3706	9.05095	22.9752	29.765	29.9247	23.7555	25.725	25.0887
26527	Zbtb48	NM_133879	2226	4.77421	0.189097	0.282503	9.03571	18.2536	11.5823	6.70728	23.3957	13.4904	5.25946	4.38667	6.80113	0.880924	20.4925	15.4803	18.7881	8.19874	3.50804	20.106	14.5165	4.86199	7.92748	7.02139	7.01825
21506	Six4	NM_011382	5572	4.76764	0.189624	0.283016	0.726091	0.771623	3.82712	1.22508	2.22686	0.0585801	0.924503	0.477945	0	0.668661	0	0	2.31487	1.63769	5.13866	3.95957	4.57254	1.11685	0.928989	1.49783	1.35667
20209	Ripk1	NM_009068	4495	4.75599	0.190562	0.284181	4.64789	0.979893	4.07568	6.87272	0.544307	2.2874	0.729281	10.763	0.170533	13.3928	0.394106	0.458656	2.08692	1.60269	4.69055	3.92663	6.08286	5.59799	7.06648	7.42684	7.39958
26564	Zc3h8	NM_020594	1567	4.7554	0.190609	0.284181	31.2859	63.0354	39.4786	37.1426	47.9562	26.8709	21.5174	20.3939	20.5456	50.4312	59.6343	16.7278	112.744	32.1817	32.8901	59.1344	33.7081	34.3608	34.0844	38.638	41.4871
2819	Banp	NM_016812	5455	4.73985	0.191868	0.285458	16.939	27.8314	29.9148	30.5598	23.2268	10.2321	16.2253	16.9241	17.9868	17.0391	41.2431	14.0917	28.1593	18.0048	20.232	38.1339	43.2886	25.4449	33.859	31.0164	31.9187
13323	Mbtps2	NM_172307	4799	4.72199	0.193324	0.287186	86.3468	65.7393	56.9898	70.9583	69.2272	79.6126	81.287	129.021	130.78	28.1535	78.3501	99.4834	19.3843	45.6355	64.3826	53.0667	64.8742	76.2263	71.2383	68.4255	67.9432
14856	Myrf	NM_001033481	5596	4.71793	0.193656	0.287545	1.05735	1.10798	0.102857	0.890086	2.49837	0.583289	0.0836853	2.45879	0.684907	0.0350417	3.32395	0	0	0.0858245	0.325603	0	0	0.725258	0.714776	1.08466	1.03565
11917	Keap1	NM_016679	4470	4.70642	0.194601	0.288762	20.9948	13.086	14.5741	14.6482	19.5873	15.4076	15.8196	22.1429	35.0691	17.9423	7.62897	13.4413	18.1878	25.1418	8.73479	16.2174	8.20218	11.5007	16.2122	15.3781	15.502
23349	Taf5l	NM_133966	2887	4.70662	0.194584	0.288762	29.7329	20.8234	38.5969	19.5108	22.337	37.1407	34.3887	23.5224	31.5302	29.4786	18.5619	1.93832	41.97	27.948	58.6952	26.2015	41.5428	15.745	20.1302	22.1808	19.9872
27107	Zgpat	NM_144894	2289	4.69894	0.195217	0.289429	25.1841	15.9718	43.0986	21.5356	27.7908	18.3239	33.9617	23.8505	8.4558	38.7219	16.8328	1.02935	30.0532	45.3207	37.8675	49.5699	39.6362	12.5297	21.2776	24.5946	27.7407
24448	Tnfrsf4	NM_011659	1155	4.69548	0.195503	0.28979	1.58532	2.4675	10.9952	3.62213	2.57224	0.282605	6.48731	0	0	0.169778	3.06754	4.33496	0	26.8205	0.45073	2.18308	14.5267	4.21667	1.83341	4.72968	3.70877
4313	Cebpb	NM_009883	1504	4.68768	0.196148	0.290468	2.59021	0.195826	2.39825	1.03852	0.116198	0	0.311371	6.19739	3.44029	5.47602	0	0.587478	0	0.798327	0.519209	0.83825	7.4372	0.8995	1.40797	1.00894	0.837693
13017	M6pr	NM_010749	2222	4.68732	0.196178	0.290472	38.796	53.6173	46.6379	85.5291	41.2128	35.1822	54.1646	30.9617	62.959	8.29559	38.667	22.7983	99.3867	36.4204	41.938	56.4548	51.7384	81.8284	83.8649	84.6816	91.7418
26752	Zfp341	NM_199304	3224	4.67372	0.197308	0.291811	9.20668	13.8754	20.9199	8.0293	14.3105	9.21314	6.53648	21.4767	0.297204	3.40609	10.7148	25.2135	5.69805	38.8807	16.0667	14.4687	14.2634	6.46211	8.97654	8.47205	8.20648
26432	Yeats2	NM_001145930	6116	4.66238	0.198256	0.292962	30.0638	26.8237	53.5813	42.4964	35.318	42.1887	24.2727	22.7877	18.1422	37.6733	35.9167	5.63426	38.9201	53.0845	51.3273	62.7685	47.145	34.2415	46.7805	44.0147	44.949
23348	Taf5	NM_177342	3258	4.65984	0.198468	0.293122	31.1673	50.8359	37.1876	43.9124	32.1308	18.4845	52.7523	23.9772	27.9397	31.7193	48.9366	59.3022	44.2689	33.9789	21.4917	41.0182	52.2618	56.3894	39.5035	38.6113	41.1456
11852	Kcp	NM_001029985	4867	4.64524	0.199696	0.294603	14.0064	25.7524	23.8951	13.8735	8.65368	13.6143	17.7045	12.2203	21.8136	10.0323	43.678	2.17851	31.4007	35.7714	12.0869	24.8675	22.8548	14.6765	15.3249	13.999	11.4936
13426	Med18	NM_026039	1677	4.64043	0.200102	0.295059	2.79638	5.01524	14.8983	3.95526	9.48317	1.55711	0	1.85269	3.8853	0	3.43315	3.68812	7.92446	4.15264	0.310431	20.298	34.8321	2.25878	4.34938	4.70524	4.50766
27234	Zzz3	NM_001080755	7600	4.62845	0.201115	0.296316	45.6508	44.2768	44.2396	70.9392	61.5344	47.5869	27.1739	30.9528	50.2543	56.4027	52.038	32.3975	48.3949	33.1136	41.442	48.3556	54.0472	67.2508	69.0383	72.5376	74.9303
3676	Cbx2	NM_007623	3740	4.61292	0.202437	0.29809	11.5743	16.8429	31.9445	19.7619	18.6911	21.906	12.3962	9.37547	6.8149	0.262157	13.2626	7.48118	29.785	24.7842	41.7588	41.4625	19.7724	16.7116	21.956	20.9764	19.4037
20303	Rnf141	NM_025999	952	4.59965	0.203572	0.29938	5.23552	15.7133	19.6245	9.05874	6.60862	7.02875	12.2979	3.26361	2.21429	0	0.465207	38.0528	8.62196	12.6122	23.2408	15.2294	27.4156	5.11581	9.63888	11.1576	10.3226
26923	Zfp667	NM_001024928	3671	4.60014	0.20353	0.29938	8.29037	18.5411	25.1337	29.556	9.23555	7.46889	9.82275	9.06806	14.147	0	11.2197	0.962754	43.441	10.1393	14.4649	42.4135	33.517	32.2089	26.4066	30.2992	29.3093
3922	Ccne1	NM_007633	1956	4.59926	0.203606	0.299398	15.6551	9.69866	8.3266	5.10793	2.85908	10.68	3.35186	65.1254	0.685817	11.2283	6.56617	10.5402	11.9896	9.82155	8.38379	11.9241	3.17699	4.97981	3.96957	4.65472	6.82762
26814	Zfp455	NM_001048204	2712	4.59745	0.203761	0.29958	1.70362	2.76759	4.93226	9.07776	1.80432	1.44428	1.38142	2.12761	3.3918	0.0723059	7.18531	0.1086	1.00886	5.93258	0.0959796	12.7839	0.916548	9.97675	9.02283	8.11315	9.19831
10721	Hmgn3	NM_026122	909	4.59236	0.204199	0.300078	54.1881	117.074	56.8311	77.4322	24.0321	15.0816	52.0336	41.016	97.3996	95.566	76.9797	256.614	17.6296	34.0788	120.269	36.0604	36.916	90.1899	66.0047	80.6296	72.9045
22126	Smcr8	NM_001085440	7391	4.59046	0.204362	0.30023	21.2593	12.9847	29.1839	29.8567	29.5564	41.1378	16.9808	22.2796	12.0826	5.51853	16.3585	5.93747	16.6583	29.8587	33.3867	30.789	22.701	26.6872	32.6302	30.8579	29.2514
26521	Zbtb43	NM_027947	5089	4.58153	0.205132	0.301162	15.7375	6.58485	14.781	17.5517	14.904	15.4257	14.7236	25.4676	12.6528	11.2516	15.3166	0.520869	3.91707	20.0547	13.5033	11.7675	13.7985	15.4186	19.0024	18.0101	17.7756
20457	Rpl11	NM_025919	594	4.57872	0.205376	0.301392	19.0491	48.1346	21.794	27.4219	8.53212	15.661	29.9588	20.1751	27.4228	12.5447	19.3852	34.2122	90.8064	36.7886	11.3935	20.1632	18.8309	22.7752	28.5197	29.1226	29.2702
15031	Ncoa7	NM_172495	5107	4.57033	0.206102	0.302069	30.2943	23.7185	18.6777	29.3819	24.6726	23.5842	27.8763	29.7233	38.0497	37.8595	50.8176	11.9954	8.34227	27.3193	14.2202	13.8243	19.3471	31.7351	29.5779	28.7324	27.4822
12757	Lrp8	NM_001080926	7296	4.55026	0.207851	0.304229	167.039	198.542	166.136	209.646	181.78	171.257	139.605	152.27	211.704	145.619	191.938	170.917	232.771	178.622	137.284	157.937	190.702	195.473	207.038	212.932	223.14
4654	Cir1	NM_025854	1945	4.5409	0.208671	0.305258	3.62411	2.42982	5.90267	9.81832	2.33614	1.59428	2.16695	4.56402	4.63082	6.45244	2.5047	2.57423	2.21053	3.45698	6.02229	5.18552	8.94589	9.32039	10.4035	10.6104	8.93906
11043	Ice1	NM_144837	7675	4.52968	0.209658	0.306321	125.355	158.485	159.518	142.562	118.451	119.059	114.04	106.351	141.799	152.429	146.395	206.377	122.682	151.529	169.235	142.581	174.726	139.321	143.502	141.324	146.098
27056	Zfp937	NM_001142411	6919	4.52962	0.209664	0.306321	1.95233	2.06722	1.88987	5.82709	3.81398	1.25016	1.82746	1.60374	0.526247	2.69243	0.0640088	1.78782	4.34982	0.590017	2.06913	3.55314	1.3472	6.88253	6.01906	5.52673	4.88005
3928	Ccnh	NM_023243	1976	4.51961	0.210548	0.307386	33.5818	28.2127	41.419	66.8406	25.6482	22.135	36.4973	34.8163	45.7756	36.6187	25.9988	19.0784	39.561	21.5102	20.8132	71.7773	51.5753	68.327	69.7766	63.969	65.2898
26990	Zfp786	NM_177882	2829	4.50633	0.211726	0.308878	8.27864	3.14416	2.7044	7.43528	15.6908	6.63432	2.97966	15.5324	7.5869	1.24768	2.34823	0.728758	6.35548	1.69768	0	8.0216	1.0983	4.39951	8.31699	8.20672	8.81789
13291	Mbd2	NM_010773	1850	4.50285	0.212036	0.309298	21.4253	31.292	26.2797	54.4899	9.16316	26.642	16.707	20.1532	17.0919	38.7947	70.8603	8.43767	14.5781	12.3314	19.1353	29.9849	43.6673	67.7155	59.3942	44.949	45.9009
26726	Zfp280c	NM_153532	4353	4.49957	0.212329	0.309692	49.0427	67.4047	55.7964	95.1975	27.4608	27.0695	72.4024	65.7671	18.5782	82.9783	55.2451	87.078	59.8909	50.2009	24.6364	92.2449	56.1034	107.034	90.2665	88.7874	94.7016
23809	Tgfb3	NM_009368	3384	4.49196	0.213008	0.31052	0.746402	1.00337	5.96633	2.09736	2.01409	0	0	0.262323	0	2.202	3.0101	0	0	0.780587	21.2299	1.30395	0.550904	1.67907	3.12882	2.01787	1.56369
15252	Nfyb	NM_010914	2552	4.49033	0.213155	0.3107	39.4292	28.2127	48.9885	83.1124	21.7082	15.3484	36.7008	27.132	83.1278	52.558	31.4109	41.8933	11.3338	18.4431	26.1113	64.4691	86.9306	91.0734	77.9989	82.4126	80.9647
1650	Akirin2	NM_001007589	1719	4.48148	0.213949	0.311693	250.336	238.112	264.9	405.778	179.235	153.235	304.846	246.068	357.633	261.002	228.266	180.928	305.141	216.947	233.192	354.603	254.858	411.285	377.774	420.098	413.953
6718	E130012A19Rik	NM_175332	2330	4.48041	0.214045	0.311735	3.47276	0.434343	8.01387	3.73758	0	0.210134	0	1.52395	0.0822476	19.0202	0	0.632022	0.671008	2.57658	13.8527	11.0922	4.53396	3.48373	3.53436	4.36345	3.56879
23442	Tasp1	NM_175225	2480	4.47954	0.214123	0.31178	11.3701	22.5247	9.70195	22.1218	16.2782	21.4535	7.55327	17.1813	0.77273	4.98141	3.03585	50.3538	14.1845	11.7164	7.24213	3.81269	16.0366	23.893	22.9595	21.4155	20.2192
20573	Rps6ka4	NM_019924	3106	4.46979	0.215001	0.312864	0.615734	2.28602	2.43183	1.13419	1.51917	0.683083	0	1.42901	0	0.0631338	0.427762	2.65506	3.77523	2.39673	4.10642	1.6236	1.60057	0.696895	0.606021	1.36794	1.8659
9373	Gm3604	NM_001162910	2919	4.46101	0.215795	0.313789	0.961461	0.946143	0.618317	3.75612	0	0.055911	0.802163	0.608224	2.75737	1.5451	1.3655	0	1.47293	0.329067	0	1.07976	1.06444	4.26386	3.78846	3.95085	3.02132
26656	Zfp119a	NM_144546	1983	4.46055	0.215836	0.313816	4.75791	1.1694	4.88177	8.36617	4.40649	1.97524	4.48702	1.5668	0.28992	15.822	1.34002	0	2.16817	3.26964	3.01907	5.40403	7.83434	8.05023	9.72949	8.1879	7.49708
24419	Tnfaip3	NM_001166402	4331	4.45815	0.216054	0.314066	3.1436	2.27199	9.91785	5.71863	1.53335	5.12486	1.18941	5.43157	3.31858	2.26384	6.33996	0.476023	0	5.48916	2.82474	5.53079	25.8267	4.24815	5.7586	5.88616	6.98161
19235	Psmc3ip	NM_008949	922	4.44785	0.216989	0.315194	40.2684	10.2233	43.7473	33.0653	16.68	1.94712	53.3317	13.4792	52.1701	104.002	12.9693	0.319439	17.3811	38.2865	35.0074	89.5637	12.1318	23.4768	36.4925	38.6766	33.6153
26850	Zfp536	NM_172385	4411	4.4382	0.21787	0.316141	22.6188	16.0456	37.404	45.5065	27.7732	19.5727	20.4902	14.9929	10.34	42.544	10.9439	32.8508	4.34193	23.4638	28.2072	52.0183	45.9267	34.5956	51.6875	47.1297	48.6133
18955	Prkcz	NM_001039079	4092	4.43337	0.218311	0.316616	28.6659	18.0089	26.7914	21.1671	28.529	34.3	24.7198	26.4662	16.6722	41.3081	10.3901	12.0199	31.6167	21.4198	24.2358	32.5041	29.0057	18.2496	23.1723	21.879	21.3676
10804	Hoxa1	NM_010449	2474	4.4283	0.218776	0.317158	0.624183	0.210651	2.28474	2.1655	0	0	2.46077	0.897032	0.387302	0	0	0	0.631952	0.194128	5.15543	1.52877	2.26062	2.1873	2.47271	2.57609	1.42591
4587	Chrd	NM_009893	3275	4.41946	0.219588	0.318101	4.26741	3.12204	12.3986	3.20507	10.0855	4.38533	6.2917	4.60792	0.23406	0	5.40918	3.95694	0	8.28564	17.0882	8.66149	15.5592	2.80897	3.3048	3.47505	3.23147
3022	Bend3	NM_199028	6049	4.41679	0.219833	0.31839	20.5814	39.1415	36.9468	20.3604	22.7372	32.97	3.48382	22.3063	34.4053	7.5857	21.5984	10.4682	85.3577	27.9875	89.0749	7.81573	22.909	17.7577	21.0821	21.5236	21.078
23148	Suv39h2	NM_022724	4281	4.41194	0.220281	0.318872	12.905	9.55333	12.887	30.2355	5.67433	7.66271	18.0495	22.2911	12.7131	11.0391	11.5866	0	17.0734	16.0428	10.0325	15.1664	10.3062	35.2037	27.0408	29.5619	29.1355
4923	Cnot11	NM_028043	3166	4.40786	0.220658	0.319317	24.4892	42.7876	38.5821	25.7087	26.4405	49.8479	20.5604	32.9454	11.319	5.82211	77.7762	26.5126	24.074	43.9164	18.0054	38.6262	53.7805	24.1855	24.0787	27.2717	27.2989
1562	Ahrr	NM_009644	4732	4.3937	0.22197	0.320847	0.37939	0.218381	1.5025	0.916444	0.147727	0.137958	0.890686	0.937978	0.161992	0	0.655143	0	0	3.55232	0.330047	1.86498	0.262646	0.800502	1.24307	0.92996	0.692247
15219	Nfe2l3	NM_010903	2544	4.39131	0.222193	0.321052	28.1127	13.157	16.4964	16.236	28.0965	11.5475	29.8212	26.6939	30.5082	42.009	19.4977	0	19.9733	17.9348	9.61788	23.044	15.3889	17.5487	16.3702	17.0593	13.9658
10157	Gsk3b	NM_019827	8298	4.38756	0.222541	0.321438	427.128	310.806	529.244	518.072	512.932	525.9	330.882	415.502	322.744	454.811	410.48	249.162	272.775	554.908	602.089	447.894	512.083	499.99	522.124	513.877	536.296
23129	Supt20	NM_019995	1968	4.38344	0.222926	0.321878	65.3294	83.3451	95.7712	128.841	84.0062	101.754	54.4925	35.4089	45.6696	70.6455	74.938	47.5905	127.507	118.726	90.3367	91.6078	82.4139	103.801	135.458	140.641	135.464
25274	Ube2i	NM_001177609	3227	4.37638	0.223585	0.322543	20.6853	18.877	38.8247	26.0871	25.1284	27.3609	21.768	24.7577	10.4518	14.6447	11.391	13.1426	32.0975	57.0762	35.0074	30.8638	32.3516	17.0206	29.9669	25.5806	31.7803
22087	Smad9	NM_019483	5368	4.37167	0.224027	0.323146	2.08789	0.490291	0.678516	1.8277	0.58601	0.729676	2.87891	3.72081	4.31969	0.292241	0.412516	0.548663	0.509694	0	2.13358	0.11743	0.463055	2.01617	2.58606	1.30034	1.40822
23816	Tgfbrap1	NM_001013025	5538	4.37122	0.224069	0.323173	34.0046	27.3064	48.8917	30.6788	47.2089	59.0871	28.751	23.8837	27.9946	17.1024	21.2722	38.3443	22.3027	68.7282	52.2661	36.1964	38.3759	26.1873	31.6521	32.7984	32.0774
22996	Stk36	NM_175031	5234	4.37084	0.224105	0.323191	21.8744	21.7939	13.1607	17.5249	18.765	22.2013	40.3524	24.9317	20.6502	4.34598	19.0385	9.22844	37.1147	5.36798	9.10094	29.5069	8.66711	13.8542	19.4649	18.2939	18.4867
[truncated: 673 more rows]
