# Supplementary material for: Molecular Profiling Defines Evolutionarily Conserved Transcription Factor Signatures of Major Vestibulospinal Neuron Groups
Source: eNeuro. 2019 Feb 27;6(1):ENEURO.0475-18.2019. doi: 10.1523/ENEURO.0475-18.2019 (PMC6426439; doi:10.1523/ENEURO.0475-18.2019)
Supplement: Figure 2-3 — TPM values and ANOVA-like analysis for TFs from chicken RNAseq data. Values calculated with ANOVA-like differential abundance analysis performed in in edgeR. TF inclusion criteria based Gene Ontology class 6355 (regulation of transcription, DNA templated) and counts per million >1 in at least three samples. Columns legend: (A) assigned gene index, (B) gene name, (C) ensembl ID, (D) transcript length in nucleotides, (E) likelihood ratio statistics, (F) two-sided p value, (G) false discovery rate adjusted p value, (H) LVST mean TPM value, (I) cMVST mean TPM value, (J) mean medial control sample TPM value, (K–N) individual LVST sample TPM values, (O–R) individual cMVST sample TPM values, (S–V) individual medial control sample TPM values. Download Figure 2-3, XLSX file. [file sup_enu-eN-NWR-0475-18-s04.xlsx]

## Sheet: tf_tpms
Index	Gene.Name	Ensembl.ID	Transcript.Length	LR	PValue	FDR-corrected	LVST mean	cMVST mean	control mean	LVST.1	LVST.2	LVST.3	LVST.4	cMVST.1	cMVST.2	cMVST.3	cMVST.4	Control.1	Control.2	Control.3	Control.4
13000	NFIB	ENSGALG00000005441	2306	213.132	5.23e-47	2.09e-43	0	0.0258594	111.326	0	0	0	0	0	0	0	0.103437	79.0245	102.89	161.738	101.652
11756	LHX1	ENSGALG00000005409	1511	200.688	2.64e-44	7.9e-41	0	200.317	94.3151	0	0	0	0	214.762	42.3145	208.5	335.69	104.427	96.1275	78.0407	98.6648
9940	FOXP2	ENSGALG00000009424	3814	165.815	9.85e-37	1.18e-33	0.249396	64.8796	43.9683	0.0274501	0	0.399603	0.570532	55.8938	52.3123	65.6638	85.6483	36.0919	47.9808	42.192	49.6088
10111	GATA3	ENSGALG00000029270	1730	161.751	7.52e-36	8.19e-33	0	0	93.8556	0	0	0	0	0	0	0	0	106.8	97.682	79.2656	91.6753
10766	HIVEP2	ENSGALG00000013795	7395	136.707	2.06e-30	1.9e-27	10.9362	111.06	26.8096	10.9438	9.12163	11.6445	12.035	110.281	99.6304	99.116	135.214	22.8614	25.9626	28.4747	29.9396
10110	GATA2	ENSGALG00000005909	1866	121.673	3.79e-27	2.53e-24	0	0	57.9458	0	0	0	0	0	0	0	0	52.7993	60.217	57.5712	61.1955
14904	RFX4	ENSGALG00000012647	2184	113.916	1.83e-25	1.1e-22	0	0.126625	72.4777	0	0	0	0	0	0	0.506498	0	50.0981	76.161	78.6882	84.9634
16380	ST18	ENSGALG00000015254	3129	107.154	5.39e-24	2.94e-21	0.557359	0	42.3884	0.167298	0.114365	0.974168	0.973605	0	0	0	0	34.725	42.273	45.6199	46.9358
1979	CHD7	ENSGALG00000041080	9990	98.3704	4.36e-22	2.01e-19	16.2335	6.71305	102.606	10.3123	6.50145	21.2632	26.857	8.18004	3.6998	8.99127	5.98108	93.6657	103.355	110.228	103.176
13617	PAX6	ENSGALG00000012123	2017	91.8492	1.14e-20	4.25e-18	0	0	34.4376	0	0	0	0	0	0	0	0	34.5944	40.2099	30.5501	32.3959
16197	SOX6	ENSGALG00000006074	2370	86.0063	2.11e-19	6.48e-17	0	0.0125805	28.5171	0	0	0	0	0	0	0	0.0503221	22.9229	27.3767	31.1125	32.6565
12021	MAF	ENSGALG00000026258	2902	81.6572	1.86e-18	5.05e-16	55.0763	81.6747	9.55223	24.1354	27.0668	76.8739	92.2291	73.8674	55.6537	87.9007	109.277	9.94942	9.29886	8.24898	10.7117
13134	NOTCH1	ENSGALG00000002375	9401	78.6879	8.19e-18	2e-15	0.114524	0.595371	57.7311	0	0.0761299	0.0810597	0.300905	0	0.204965	0.0706005	2.10592	55.1755	58.5231	58.0952	59.1306
16720	TBX20	ENSGALG00000032097	1323	78.5372	8.83e-18	2.12e-15	0	0	41.1319	0	0	0	0	0	0	0	0	36.2777	32.1003	55.511	40.6386
13070	NKX6-1	ENSGALG00000032545	864	63.9759	1.28e-14	2.16e-12	0	0	41.5301	0	0	0	0	0	0	0	0	37.3755	43.18	42.2441	43.3208
10705	HES5	ENSGALG00000001141	1523	63.0308	2.06e-14	3.37e-12	0.616778	0	118.285	0	2.46711	0	0	0	0	0	0	97.9503	115.316	139.91	119.964
11235	ISL1	ENSGALG00000014884	1668	61.5744	4.26e-14	6.71e-12	0	0	20.0115	0	0	0	0	0	0	0	0	19.4359	16.7971	26.2228	17.5903
2661	DACH2	ENSGALG00000006886	1827	61.1186	5.35e-14	8.32e-12	195.513	47.6206	54.1355	147.558	124.767	279.145	230.583	62.49	13.0395	67.6914	47.2615	46.7871	50.2028	56.6164	62.9359
2414	CREB5	ENSGALG00000038265	1578	59.2485	1.36e-13	2.07e-11	0	0	18.9562	0	0	0	0	0	0	0	0	14.365	19.5306	20.3205	21.6088
11226	IRX1	ENSGALG00000030991	1533	58.6529	1.84e-13	2.65e-11	13.8295	0	52.8666	19.5321	1.63401	24.3575	9.79416	0	0	0	0	50.5557	54.6364	53.3047	52.9696
2689	DBX1	ENSGALG00000003965	2049	58.3095	2.18e-13	3.11e-11	0	0	13.8971	0	0	0	0	0	0	0	0	13.7206	13.6738	15.5774	12.6167
9911	FOS	ENSGALG00000028037	2244	57.5665	3.16e-13	4.25e-11	130.851	15.8918	3.10098	224.833	161.223	89.0578	48.2911	6.64997	47.4615	4.14083	5.31477	3.16028	3.74566	3.09498	2.40301
17554	TXN	ENSGALG00000015704	765	57.5008	3.26e-13	4.35e-11	883.45	743.174	254.149	921.999	743.296	772.253	1096.25	735.057	814.485	698.998	724.155	240.196	220.516	400.811	155.074
11227	IRX2	ENSGALG00000013193	1434	54.0295	1.85e-12	2.13e-10	0	0	16.4939	0	0	0	0	0	0	0	0	16.514	15.8361	15.0448	18.5806
10722	HHEX	ENSGALG00000030008	1843	49.839	1.51e-11	1.44e-09	0	0	9.81098	0	0	0	0	0	0	0	0	10.2381	11.3616	8.1782	9.46599
16184	SOX1	ENSGALG00000030353	2307	49.7497	1.57e-11	1.48e-09	0	0.0646204	15.4743	0	0	0	0	0	0	0	0.258482	11.1981	14.7013	17.2301	18.7678
9453	EVX1	ENSGALG00000037310	1230	49.1286	2.15e-11	1.99e-09	0	20.7482	2.50844	0	0	0	0	35.241	9.96905	16.5479	21.2347	3.08871	1.31875	2.40274	3.22354
9338	EPAS1	ENSGALG00000010005	2520	48.2892	3.27e-11	2.86e-09	0.267286	0.396784	67.7999	0	0	0.982793	0.0863495	0	0	1.49248	0.0946535	60.9566	69.2246	74.9985	66.0197
11757	LHX2	ENSGALG00000001124	1114	47.3459	5.24e-11	4.4e-09	0	0	13.7753	0	0	0	0	0	0	0	0	11.8225	17.6053	11.0097	14.6639
16199	SOX9	ENSGALG00000004386	1640	47.1875	5.67e-11	4.72e-09	0	0	9.00363	0	0	0	0	0	0	0	0	8.57116	10.2503	8.19937	8.99369
9871	FLI1	ENSGALG00000001161	1242	47.0024	6.22e-11	5.14e-09	0	0	11.8397	0	0	0	0	0	0	0	0	11.2158	10.2106	13.8013	12.1311
11764	LHX9	ENSGALG00000002223	1550	46.5904	7.64e-11	6.14e-09	0	0	9.4228	0	0	0	0	0	0	0	0	7.02631	9.70386	8.58012	12.3809
3129	EBF3	ENSGALG00000010461	1851	45.9654	1.04e-10	7.92e-09	56.8806	8.89446	172.853	20.3055	86.5139	25.0103	95.6926	9.8534	3.69079	9.92047	12.1132	144.972	159.41	194.071	192.957
12994	NFATC1	ENSGALG00000042534	2673	45.5625	1.28e-10	9.39e-09	0	0	5.16756	0	0	0	0	0	0	0	0	3.07946	6.01317	4.75425	6.82335
9924	FOXJ1	ENSGALG00000041025	2682	44.739	1.93e-10	1.31e-08	0.0710331	0	11.7321	0	0	0.284132	0	0	0	0	0	9.34904	12.4808	12.562	12.5365
16190	SOX18	ENSGALG00000034118	1583	44.7195	1.95e-10	1.32e-08	0	0	6.84954	0	0	0	0	0	0	0	0	6.15985	7.63852	7.18774	6.41206
9391	ERG	ENSGALG00000016058	1431	44.7075	1.96e-10	1.32e-08	0	0	7.79001	0	0	0	0	0	0	0	0	6.10619	8.24378	8.05448	8.7556
18027	WTIP	ENSGALG00000025864	2076	44.499	2.17e-10	1.4e-08	0	0	5.06177	0	0	0	0	0	0	0	0	5.91705	5.04321	4.62667	4.66016
16719	TBX2	ENSGALG00000034297	3359	44.4939	2.18e-10	1.4e-08	0	0	3.29521	0	0	0	0	0	0	0	0	3.39307	2.67791	4.13524	2.9746
13392	OLIG2	ENSGALG00000031010	1557	44.4857	2.19e-10	1.4e-08	0	0	6.30035	0	0	0	0	0	0	0	0	5.69338	6.34545	6.64343	6.51914
3319	EN1	ENSGALG00000042389	1005	44.4614	2.21e-10	1.41e-08	0	0	10.1068	0	0	0	0	0	0	0	0	9.0725	10.4176	11.4686	9.46856
14205	PPARGC1A	ENSGALG00000042851	2928	44.4186	2.26e-10	1.42e-08	62.9896	53.4622	12.6975	89.3554	52.7973	51.987	57.8188	24.7544	63.7745	47.0736	78.2463	11.8073	13.7993	12.6169	12.5665
1080	BHLHE22	ENSGALG00000040249	2054	44.3648	2.32e-10	1.44e-08	0	0	3.0633	0	0	0	0	0	0	0	0	3.45261	3.08705	3.16545	2.54807
16717	TBX18	ENSGALG00000032789	1874	44.2812	2.42e-10	1.48e-08	0	0	3.52714	0	0	0	0	0	0	0	0	2.97333	3.06882	4.25801	3.80839
11821	LMX1B	ENSGALG00000040582	1457	44.1826	2.55e-10	1.5e-08	0	3.42895	46.2374	0	0	0	0	0	0.961814	3.34059	9.41338	28.3347	44.5317	49.4929	62.5903
9439	ETS1	ENSGALG00000001143	1530	44.1573	2.58e-10	1.5e-08	0	0	6.19182	0	0	0	0	0	0	0	0	5.38	6.84294	7.05041	5.49393
9915	FOXA2	ENSGALG00000030889	1929	44.1235	2.62e-10	1.5e-08	0	0	3.70817	0	0	0	0	0	0	0	0	2.82291	3.89865	3.75359	4.35755
16722	TBX3	ENSGALG00000036043	2199	43.9635	2.84e-10	1.51e-08	0	0	3.38993	0	0	0	0	0	0	0	0	3.85843	3.95642	3.29271	2.45218
12397	MKX	ENSGALG00000007426	1035	43.3944	3.78e-10	1.8e-08	0	0	7.58019	0	0	0	0	0	0	0	0	6.48479	5.41401	9.99402	8.42793
16820	TFAP2B	ENSGALG00000016680	1329	43.3861	3.79e-10	1.8e-08	0	0	5.37946	0	0	0	0	0	0	0	0	3.14448	6.65736	6.22653	5.48948
13618	PAX7	ENSGALG00000043204	1367	43.2503	4.06e-10	1.86e-08	0	0	4.10004	0	0	0	0	0	0	0	0	2.77916	3.66764	5.08057	4.87281
10015	FZD7	ENSGALG00000034973	1767	43.0654	4.45e-10	2e-08	0	0	2.81325	0	0	0	0	0	0	0	0	2.15003	3.1712	2.34155	3.59023
12984	NEUROD2	ENSGALG00000039633	1254	43.0586	4.47e-10	2e-08	0	0	3.3225	0	0	0	0	0	0	0	0	3.7365	2.93981	2.94595	3.66774
17885	VSX2	ENSGALG00000033517	2189	41.9542	7.76e-10	3.15e-08	0.0239139	0	8.89861	0.0956554	0	0	0	0	0	0	0	8.96699	7.20799	9.85575	9.56372
10713	HEYL	ENSGALG00000044737	951	41.7055	8.79e-10	3.5e-08	0	0	3.60338	0	0	0	0	0	0	0	0	2.53008	4.4967	3.88456	3.50217
4517	ENSGALG00000026698	ENSGALG00000026698	1291	41.3253	1.06e-09	3.99e-08	0.042138	0	10.0481	0	0	0	0.168552	0	0	0	0	9.51494	11.5364	8.69901	10.4422
14902	RFX2	ENSGALG00000001773	1857	41.3187	1.07e-09	3.99e-08	0	0	2.2408	0	0	0	0	0	0	0	0	1.43208	2.62046	1.75063	3.16001
16185	SOX10	ENSGALG00000012290	3327	41.1696	1.15e-09	4.26e-08	0	0.00896178	3.44777	0	0	0	0	0	0	0	0.0358471	3.1212	2.52638	4.66358	3.47992
16188	SOX14	ENSGALG00000037352	957	41.1727	1.15e-09	4.26e-08	0	0	4.78571	0	0	0	0	0	0	0	0	7.27799	4.77668	2.77935	4.30884
10712	HEY2	ENSGALG00000034716	1008	41.0425	1.22e-09	4.48e-08	0	0	2.9682	0	0	0	0	0	0	0	0	3.64333	2.48694	3.22511	2.51743
12223	MECOM	ENSGALG00000032577	3708	40.7343	1.43e-09	5.09e-08	0.938413	3.20343	60.4915	0	0.386029	1.07894	2.28868	0.191639	3.54309	4.41522	4.66375	63.5234	63.1917	55.7122	59.5385
18034	WWTR1	ENSGALG00000010412	1161	40.7062	1.45e-09	5.13e-08	0	0.0256812	6.04473	0	0	0	0	0	0	0	0.102725	4.79933	6.60461	6.49114	6.28383
12702	MYB	ENSGALG00000013956	1929	40.4438	1.65e-09	5.72e-08	0	0	1.43631	0	0	0	0	0	0	0	0	1.11603	1.29955	1.68528	1.64436
15343	SATB2	ENSGALG00000008135	2910	39.915	2.15e-09	7.12e-08	0	0.010246	1.92859	0	0	0	0	0	0	0	0.040984	2.34996	1.72291	1.62495	2.01654
10129	GBX2	ENSGALG00000013342	1609	39.8531	2.22e-09	7.28e-08	0	0	1.71238	0	0	0	0	0	0	0	0	1.65281	1.19142	1.83678	2.16853
13063	NKX2-2	ENSGALG00000036869	905	39.2912	2.94e-09	9.17e-08	0	0	2.83965	0	0	0	0	0	0	0	0	1.81909	3.2588	2.77577	3.50494
12985	NEUROD4	ENSGALG00000034306	1112	39.1373	3.17e-09	9.8e-08	0	0	2.47158	0	0	0	0	0	0	0	0	2.16376	3.71304	1.72751	2.28199
9914	FOXA1	ENSGALG00000032713	2633	38.5892	4.17e-09	1.23e-07	0	0	1.58318	0	0	0	0	0	0	0	0	0.577153	2.24019	1.34692	2.16845
15271	RUNX1	ENSGALG00000016022	1849	37.8038	6.18e-09	1.73e-07	0	0	1.3866	0	0	0	0	0	0	0	0	2.05468	1.59503	1.03894	0.857752
9454	EVX2	ENSGALG00000020768	1311	37.6253	6.76e-09	1.87e-07	0	9.37785	0.505099	0	0	0	0	3.79418	17.3701	1.5188	14.8283	0.289787	0.674877	0.450858	0.604875
16198	SOX8	ENSGALG00000005263	1613	37.5957	6.86e-09	1.89e-07	0	0.308353	12.0965	0	0	0	0	0	0.325798	0.685798	0.221817	11.4625	13.4388	12.2759	11.2091
15342	SATB1	ENSGALG00000011254	2124	37.5549	7e-09	1.92e-07	8.25442	3.76737	101.805	1.33087	2.19022	7.26524	22.2313	0.669112	2.14427	7.70793	4.54818	96.6471	109.485	95.7297	105.359
11758	LHX3	ENSGALG00000003928	1194	37.5062	7.17e-09	1.95e-07	0	0	3.54966	0	0	0	0	0	0	0	0	6.15154	4.56955	1.48511	1.99244
13616	PAX5	ENSGALG00000016431	1071	37.434	7.44e-09	2.01e-07	0.0444703	0	6.2249	0	0	0.177881	0	0	0	0	0	3.78374	3.99286	8.83025	8.29272
12995	NFATC2	ENSGALG00000007963	2146	37.4304	7.45e-09	2.01e-07	0	0	1.09204	0	0	0	0	0	0	0	0	0.767139	0.755856	1.51487	1.33028
16822	TFAP2D	ENSGALG00000019842	1359	37.1767	8.46e-09	2.26e-07	0	0	2.03744	0	0	0	0	0	0	0	0	1.67731	3.14669	2.39214	0.933618
10254	GLI3	ENSGALG00000040266	4770	37.1035	8.77e-09	2.33e-07	0.206796	0.0187521	10.739	0	0	0.59909	0.228093	0	0	0	0.0750084	9.98229	10.3562	10.7806	11.8367
2690	DBX2	ENSGALG00000009604	913	37.0313	9.09e-09	2.38e-07	0.119168	0.88174	70.6963	0	0	0	0.476672	0	0	0	3.52696	71.8488	64.7664	74.7746	71.3953
16191	SOX2	ENSGALG00000043460	1358	36.773	1.03e-08	2.69e-07	0	0.351291	25.4666	0	0	0	0	0	0	0	1.40517	21.5413	30.9472	22.6332	26.7445
14739	RARB	ENSGALG00000011298	1194	34.6693	2.96e-08	6.89e-07	0.250679	27.9833	30.9275	0	0	0.638227	0.36449	25.1942	9.8295	65.2227	11.6866	32.2426	37.4209	29.2072	24.8391
16773	TEAD4	ENSGALG00000014342	1462	34.3171	3.53e-08	8.03e-07	0	0.891825	15.6579	0	0	0	0	0.162015	0.119816	0.756629	2.52884	14.0323	17.1466	16.3738	15.0788
9941	FOXP4	ENSGALG00000033497	2362	33.3704	5.67e-08	1.23e-06	0.106555	12.7393	13.1204	0	0	0.24197	0.184251	27.2766	2.89232	13.1132	7.67487	13.0283	17.2932	9.13389	13.0263
11229	IRX4	ENSGALG00000022896	2411	33.2113	6.14e-08	1.32e-06	0.225633	0	12.5968	0	0	0	0.902533	0	0	0	0	10.6625	10.8256	13.1772	15.7217
15681	SIM2	ENSGALG00000016044	2304	32.8356	7.41e-08	1.56e-06	0	0.0129409	1.11338	0	0	0	0	0	0	0	0.0517636	0.934387	1.08803	0.641358	1.78974
13874	PHOX2B	ENSGALG00000014250	879	32.7241	7.84e-08	1.64e-06	16.1154	0	1.76141	1.54839	2.03554	17.5556	43.3221	0	0	0	0	1.58476	2.34863	1.84921	1.26301
17700	UNCX	ENSGALG00000039292	739	32.7132	7.88e-08	1.64e-06	0	0	2.27528	0	0	0	0	0	0	0	0	2.05635	1.39679	1.99958	3.64841
10838	HOXA3	ENSGALG00000027925	2359	32.2718	9.82e-08	1.99e-06	0.438153	8.08425	57.8138	0	0	0	1.75261	15.3626	5.34645	6.47115	5.15679	86.3751	70.5111	34.7028	39.6664
3393	ENSGALG00000001136	ENSGALG00000001136	1404	31.5906	1.38e-07	2.73e-06	5.41615	0.0212364	158.344	0	21.6646	0	0	0	0	0	0.0849455	146.931	156.178	188.5	141.767
18209	ZFHX3	ENSGALG00000000713	14872	30.3701	2.54e-07	4.8e-06	126.664	191.386	114.862	92.6076	94.9843	175.087	143.975	228.138	158.504	170.6	208.302	130.673	114.284	104.438	110.055
9935	FOXO1	ENSGALG00000017034	5715	30.3558	2.56e-07	4.82e-06	0.0940034	0	3.2751	0	0	0.0333352	0.342678	0	0	0	0	2.65904	3.2769	3.72331	3.44115
12023	MAFA	ENSGALG00000026264	2134	29.3992	4.13e-07	7.51e-06	10.478	0.0139718	1.26588	0.196242	1.17382	16.0693	24.4724	0	0	0	0.0558873	1.66159	1.45111	0.761695	1.18912
12268	MEOX2	ENSGALG00000010794	1893	29.0127	5.01e-07	8.97e-06	0	0.0625635	1.61243	0	0	0	0	0.250254	0	0	0	2.07382	1.55796	1.56121	1.25672
4547	ENSGALG00000027138	ENSGALG00000027138	1119	28.7295	5.77e-07	1.02e-05	0.0399741	10.9271	0.360641	0	0.159897	0	0	5.08023	0.469626	24.5161	13.6423	0.11317	0.395337	0.792326	0.141732
6170	ENSGALG00000036751	ENSGALG00000036751	279	27.9534	8.51e-07	1.45e-05	0.170708	22.5117	1.44794	0	0	0.682834	0	36.5062	2.5114	19.8242	31.2051	1.36169	0.528533	1.05927	2.84226
776	ASF1A	ENSGALG00000014887	534	27.4716	1.08e-06	1.78e-05	16.0092	266.947	57.2703	0.392116	8.71167	40.6708	14.2622	61.2124	808.277	80.375	117.923	54.0697	53.2957	65.5828	56.1331
3128	EBF2	ENSGALG00000000242	2653	26.378	1.87e-06	2.88e-05	0.143536	0.730687	32.9306	0	0	0	0.574144	2.58918	0	0.333567	0	26.158	31.0707	37.4296	37.0641
16251	SPI1	ENSGALG00000008127	1441	25.7626	2.55e-06	3.82e-05	0.278514	0	3.53043	0	0	0.661036	0.45302	0	0	0	0	3.51525	2.96763	3.89675	3.74208
12248	MED6	ENSGALG00000029743	1268	25.5395	2.85e-06	4.22e-05	195.628	73.3504	76.3903	321.35	267.822	109.078	84.2602	58.656	86.3419	38.7342	109.67	62.5195	74.0792	82.1585	86.8038
10846	HOXB2	ENSGALG00000025774	1457	25.1711	3.42e-06	5e-05	2.06977	0	12.7303	0.287426	0	2.61511	5.37655	0	0	0	0	12.2552	12.3474	13.6917	12.6269
15273	RUNX2	ENSGALG00000040276	1420	24.5251	4.73e-06	6.69e-05	0.07662	0.0209971	1.71845	0	0	0	0.30648	0	0	0	0.0839883	2.31871	1.66153	1.665	1.22858
4625	ENSGALG00000028415	ENSGALG00000028415	1559	24.3716	5.1e-06	7.18e-05	1.85956	5.66379	108.315	0	0.229537	5.25462	1.95408	5.16577	0	16.0359	1.4535	104.218	108.302	109.855	110.887
13205	NR4A2	ENSGALG00000012538	4197	24.1398	5.73e-06	7.97e-05	0.0476412	4.64589	13.9834	0.0997807	0	0.0907842	0	0.959427	2.00338	0.105427	15.5153	15.9013	14.7566	12.9566	12.3191
13615	PAX3	ENSGALG00000030944	1224	23.7814	6.85e-06	9.39e-05	0.450159	0	5.04396	0	0	1.08952	0.711114	0	0	0	0	5.38	4.6985	5.43268	4.66466
9930	FOXM1	ENSGALG00000013420	2031	23.4239	8.2e-06	0.000110458	0	0.132123	2.67462	0	0	0	0	0	0	0	0.528494	2.24467	2.75899	3.27405	2.42075
14198	POU6F2	ENSGALG00000031713	2022	23.3723	8.41e-06	0.000112708	64.0683	116.277	31.0055	49.8621	24.2459	111.461	70.7041	234.874	70.1721	31.9494	128.111	34.3836	29.39	30.9131	29.3352
10830	HOPX	ENSGALG00000011404	944	22.6467	1.21e-05	0.000156403	0.236923	0	9.30384	0	0.947692	0	0	0	0	0	0	5.90257	8.90387	8.29634	14.1126
13208	NR5A2	ENSGALG00000002182	1269	22.2626	1.46e-05	0.000184928	0	0.186655	4.31958	0	0	0	0	0.746621	0	0	0	7.08528	4.29948	3.14402	2.74954
13614	PAX2	ENSGALG00000005689	1149	22.1506	1.55e-05	0.000194557	2.8187	6.40213	308.989	0	0	11.2748	0	2.06149	0	0.192549	23.3545	356.325	296.076	279.333	304.222
17265	TP63	ENSGALG00000007324	2420	21.9511	1.71e-05	0.000212736	0.0899177	0	0.955971	0	0	0	0.359671	0	0	0	0	0.78494	1.09681	1.22123	0.720902
13148	NPAS3	ENSGALG00000029022	2346	21.5758	2.06e-05	0.000251942	14.9836	23.4385	116.833	14.5484	6.02516	17.3782	21.9827	28.7752	8.06411	39.325	17.5896	102.67	117.101	120.873	126.689
564	APBB2	ENSGALG00000014262	2163	21.289	2.38e-05	0.000284695	21.4812	87.3876	101.67	8.37365	6.53491	29.0654	41.9508	86.2922	60.6577	104.124	98.4764	92.1528	109.283	113.884	91.3609
13017	NFYC	ENSGALG00000003189	1460	20.6001	3.36e-05	0.000384146	119.862	128.028	71.9955	130.582	73.5305	126.442	148.893	147.635	70.908	126.682	166.887	83.0079	70.5993	62.2451	72.1297
11336	KAT6B	ENSGALG00000005035	6078	20.3971	3.72e-05	0.000421167	9.26993	19.4962	60.559	9.24994	4.82783	14.7318	8.27012	21.6679	9.25135	21.9491	25.1164	57.6721	58.9794	64.1596	61.4249
16771	TEAD1	ENSGALG00000005415	1836	19.5578	5.66e-05	0.000601064	7.2749	4.45224	79.5158	0.34214	2.14397	10.3764	16.2371	2.45122	0.0954088	2.5305	12.7318	67.7328	83.6092	81.2889	85.4323
12704	MYBL1	ENSGALG00000033304	834	19.1356	6.99e-05	0.000729386	1.89161	0	23.1008	0	0	0	7.56645	0	0	0	0	24.7504	25.9913	20.553	21.1084
12202	MCTS1	ENSGALG00000008517	2276	18.8552	8.05e-05	0.000822709	70.5865	54.8901	31.4456	23.1837	85.7673	103.793	69.6016	41.7325	72.7311	55.8928	49.204	31.548	32.4595	32.787	28.9881
12709	MYC	ENSGALG00000033631	2111	18.8341	8.13e-05	0.000830017	37.1863	23.5632	10.0731	39.7255	20.5962	34.2035	54.2198	40.955	4.89581	27.6679	20.7341	10.0782	9.56992	9.44992	11.1943
12801	NAB1	ENSGALG00000037778	1565	18.4572	9.82e-05	0.000975228	0.538999	0.0190517	5.73222	0	0	1.46078	0.69521	0	0	0	0.0762067	4.36958	5.93611	6.13736	6.48581
16605	T	ENSGALG00000011489	2168	18.4179	0.000100141	0.000990829	0.897076	0	6.37163	0	0	0.175748	3.41256	0	0	0	0	5.8996	7.34582	5.6572	6.58388
9444	ETV6	ENSGALG00000012921	5462	18.3887	0.000101611	0.00100286	13.0277	2.57489	6.08939	14.6634	20.7358	7.15025	9.56137	1.12752	0.41692	6.15676	2.59838	6.30634	6.47941	5.73544	5.83637
13397	ONECUT1	ENSGALG00000038618	3495	17.7215	0.000141849	0.00133935	50.4838	92.0416	33.3156	88.1594	23.3958	55.3271	35.0527	148.151	31.3252	82.7349	105.955	37.0309	31.8127	31.8369	32.5819
10703	HES1	ENSGALG00000028015	495	17.6718	0.000145417	0.00136873	0	0.481872	3.98609	0	0	0	0	0	0	0	1.92749	4.34915	5.3622	2.38818	3.84481
12024	MAFB	ENSGALG00000003670	2651	17.6675	0.000145734	0.00137063	15.1029	24.2669	5.53192	2.84347	10.0565	28.9611	18.5506	28.1451	27.6863	21.5313	19.7048	6.30558	6.17432	4.68222	4.96555
3114	E2F1	ENSGALG00000003045	4424	17.4376	0.000163482	0.00151731	0	0.133814	0.806847	0	0	0	0	0	0	0.0500087	0.485249	0.772875	0.866631	0.835041	0.75284
842	ATOH8	ENSGALG00000033083	957	16.7453	0.000231098	0.00203305	0.0467409	1.30135	4.52486	0	0.186964	0	0	2.72259	0.366082	1.61825	0.498489	4.76377	3.85216	4.01462	5.46891
13477	OTP	ENSGALG00000026744	978	16.6729	0.000239624	0.00209269	0	0.961863	3.63674	0	0	0	0	0	0	2.26215	1.5853	3.88457	3.16633	3.92841	3.56765
12712	MYCL	ENSGALG00000024047	1044	16.3049	0.000288023	0.0024528	0.228102	0	1.42502	0	0	0.912407	0	0	0	0	0	1.8195	1.5537	1.41541	0.911485
9426	ESRRG	ENSGALG00000009645	1389	16.249	0.000296197	0.00251348	143.462	176.631	85.7437	25.9287	106.788	162.119	279.011	124.828	131.157	147.014	303.525	88.6185	88.7524	82.0228	83.581
15326	SAP18	ENSGALG00000017129	696	16.062	0.000325229	0.0027213	338.888	310.333	251.179	261.737	419.032	302.737	372.047	310.035	166.613	413.233	351.45	254.548	269.709	244.158	236.302
16819	TFAP2A	ENSGALG00000012775	1839	15.9864	0.000337752	0.00279871	0.0554801	6.26747	6.23463	0	0	0.103595	0.118326	17.6458	0	5.41366	2.01042	4.3383	5.77334	7.1514	7.6755
10806	HNF4beta	ENSGALG00000005708	1923	15.8093	0.000369031	0.00302237	0	0.170554	1.06067	0	0	0	0	0	0	0	0.682214	1.25122	0.843509	1.0758	1.07217
2907	DMBX1	ENSGALG00000010436	1089	15.6068	0.000408338	0.00327491	0	7.27162	1.5313	0	0	0	0	0	0	25.801	3.28549	1.39545	1.4895	1.49261	1.74764
3193	EFEMP1	ENSGALG00000037901	1356	15.5737	0.000415151	0.00332287	0.573249	15.4637	9.56204	0	0.5278	0	1.7652	20.2628	15.2434	21.8628	4.48557	9.80596	8.15601	10.4615	9.82468
17884	VSX1	ENSGALG00000037576	1998	15.5067	0.000429312	0.00341305	0.153195	0.298457	8.62238	0	0	0.286052	0.326728	0	0	0	1.19383	10.8383	10.3326	6.73021	6.58842
2415	CREBBP	ENSGALG00000007762	10292	15.5057	0.000429517	0.00341305	18.1093	42.3934	59.5947	7.14106	11.7347	30.5794	22.9821	56.1324	30.4659	40.5632	42.412	55.7636	60.4342	60.1872	61.9939
12234	MED17	ENSGALG00000017218	2906	15.4579	0.000439896	0.00348026	10.8774	52.5648	22.4763	10.1957	4.6178	13.5704	15.1257	95.2027	6.38956	53.6728	54.9942	22.1811	24.7628	23.6959	19.2654
1168	BRF1	ENSGALG00000011705	2046	15.3027	0.000475408	0.00371581	121.258	62.2016	69.5194	59.9718	276.694	71.7907	76.575	42.7192	67.7223	59.9052	78.4597	71.86	73.3699	59.4397	73.4079
15650	SHH	ENSGALG00000006379	1552	15.2869	0.000479173	0.00373549	4.64624	0.0192112	11.4621	0.067458	0	17.6762	0.84124	0	0	0	0.076845	6.60927	11.8767	10.0925	17.2701
12999	NFIA	ENSGALG00000010924	1677	15.2287	0.000493333	0.00383092	105.399	236.44	552.462	75.1031	167.615	100.765	78.1131	239.267	229.905	240.763	235.824	428.693	569.091	616.54	595.524
12983	NEUROD1	ENSGALG00000008908	1589	15.2089	0.000498222	0.00386124	0.349195	0.260865	10.8691	0	0.112602	0.599467	0.68471	1.04346	0	0	0	11.5559	10.0225	11.7173	10.1806
16016	SMAD5	ENSGALG00000006309	1395	15.156	0.000511577	0.00394447	4.037	4.92643	78.2096	0.0750501	2.43696	11.6082	2.02782	0.509388	0	2.6961	16.5002	63.727	75.6859	86.2249	87.2007
10711	HEY1	ENSGALG00000035031	877	14.854	0.000594958	0.00449199	16.0596	1.06108	80.563	0	35.2952	11.0787	17.8646	0	3.19581	0.504535	0.543961	70.755	84.0711	81.8878	85.5382
9934	FOXN4	ENSGALG00000005062	2498	14.7248	0.000634675	0.00473516	0	0.334205	2.23475	0	0	0	0	0	0	0	1.33682	1.52086	2.53835	2.72112	2.15866
10704	HES4	ENSGALG00000002055	1210	14.2369	0.000810005	0.00583262	15.2366	0.552116	24.4123	0	13.1605	29.4426	18.3432	0.195757	0	0.731367	1.28134	20.4084	24.6174	24.1803	28.4428
1118	BMP2	ENSGALG00000029301	1259	14.2319	0.000812034	0.00584372	0	0.307868	1.48794	0	0	0	0	0	0	0	1.23147	1.50878	1.4055	1.52581	1.51166
10737	HINFP	ENSGALG00000006806	1359	13.9469	0.000936403	0.00656523	2.95676	22.0375	2.40328	1.07853	0	0.981291	9.76721	18.1266	65.7373	1.30236	2.98378	2.51597	2.49565	2.50087	2.10064
1548	CBFA2T3	ENSGALG00000032410	1737	13.5756	0.00112743	0.00767115	22.3868	63.8685	32.3338	13.6821	26.37	21.0582	28.4372	55.6368	87.6357	42.9231	69.2785	34.2656	33.9575	25.7766	35.3354
10540	GTF2A2	ENSGALG00000003793	745	13.5003	0.0011707	0.0078938	204.579	355.693	229.838	116.921	243.049	250.093	208.254	304.587	497.766	326.661	293.756	224.887	227.228	230.083	237.152
16933	TLE3	ENSGALG00000008120	2376	13.4216	0.0012177	0.00816938	0.325974	2.52831	11.0278	0.088127	0.15061	0.881994	0.183166	0.996909	0.14745	1.48982	7.47906	10.0734	10.7368	9.95076	13.35
15327	SAP30	ENSGALG00000036252	853	13.1216	0.00141475	0.00918785	35.3902	6.93596	7.87373	83.3386	42.3713	5.13686	10.7142	7.21982	0.410716	0.259365	19.8539	10.0953	8.98939	5.71673	6.69348
16187	SOX13	ENSGALG00000000583	2241	12.8154	0.00164885	0.0104201	1.45124	0	2.7633	0	0	5.61076	0.1942	0	0	0	0	2.26037	3.02686	2.43973	3.32625
12993	NFAT5	ENSGALG00000039300	5305	12.8003	0.00166128	0.0104766	20.3921	39.0293	80.873	7.89405	11.265	35.9115	26.4977	40.0059	39.5908	30.8608	45.6596	75.4331	80.8879	83.731	83.4398
18146	ZBTB7A	ENSGALG00000025907	1793	12.6069	0.00182997	0.0113787	0.0606806	0.181993	1.34311	0	0	0	0.242723	0.528423	0	0	0.199548	1.27131	1.72709	1.40104	0.972996
13206	NR4A3	ENSGALG00000013568	1800	12.1385	0.00231289	0.0137944	9.973	0.891587	5.00851	11.5164	13.1211	12.5949	2.65956	0	0	1.84365	1.72269	4.08052	5.40689	5.17191	5.37472
18129	ZBTB32	ENSGALG00000038540	2241	11.9785	0.00250551	0.0147378	0.0970998	0.246808	5.87755	0	0	0	0.388399	0	0	0.987231	0	5.93346	4.21128	5.93449	7.43098
9485	EYA1	ENSGALG00000043033	1180	11.9599	0.00252891	0.0148682	82.4486	45.7492	14.5491	5.50092	275.665	25.0247	23.6041	31.5152	105.845	3.18733	42.4497	12.3417	15.4959	14.9021	15.4566
2524	CTNNB1	ENSGALG00000037203	1439	11.8443	0.00267938	0.0155243	208.63	162.821	522.559	149.221	154.429	237.509	293.36	135.469	167.867	137.601	210.348	522.212	585.231	505.125	477.669
9931	FOXN1	ENSGALG00000043868	1962	11.828	0.00270139	0.0156217	0.45755	0	0.633642	0	0	0.388401	1.4418	0	0	0	0	0.968173	0.300633	0.376577	0.889185
1507	CARHSP1	ENSGALG00000042981	2298	11.7537	0.00280358	0.016127	0.0829028	0.68296	8.81918	0	0	0.331611	0	2.67994	0	0	0.0518988	8.26612	9.36869	9.77409	7.8678
15204	RPS6KA5	ENSGALG00000030580	1845	11.7487	0.00281056	0.0161593	23.5043	60.8487	34.9917	12.6542	13.286	43.7813	24.2958	81.5228	61.7132	47.6052	52.5535	31.9166	34.1277	38.7643	35.1581
16626	TAF15	ENSGALG00000002060	1869	11.5526	0.00310015	0.0175714	165.582	208.795	141.209	206.757	61.939	194.894	198.74	187.693	255.961	251.779	139.747	163.225	139.413	124.05	138.148
14390	PROX1	ENSGALG00000009791	2337	11.3791	0.00338115	0.018896	74.93	73.4982	38.2702	138.384	6.50773	54.4549	100.374	59.6978	48.3461	89.6503	96.2987	37.2812	41.3925	38.5071	35.9001
12448	MNAT1	ENSGALG00000011910	2052	11.1191	0.00385048	0.0210669	37.9311	41.0386	21.8817	54.1842	24.3274	28.7809	44.4321	75.3768	21.5122	26.5227	40.7425	21.6616	24.433	21.0275	20.4045
10783	HMGA2	ENSGALG00000009875	479	10.9386	0.00421426	0.0226639	0.227141	1.36039	9.396	0	0	0	0.908563	0	0	0.461876	4.97968	7.40258	10.4669	11.1058	8.60868
12226	MED10	ENSGALG00000028336	1134	10.7413	0.00465101	0.0244745	99.8718	119.538	65.4928	28.1587	170.562	131.879	68.8877	82.0883	140.723	159.003	96.3362	69.3488	68.6589	68.0206	55.943
16844	TGFBR1	ENSGALG00000033179	2153	10.4754	0.00531257	0.0272758	39.8771	103.152	62.8422	21.2502	60.0846	38.7569	39.4168	45.5468	243.107	57.6473	66.3067	65.1713	66.0936	60.8783	59.2258
5131	ENSGALG00000031456	ENSGALG00000031456	3726	10.4319	0.0054293	0.0277771	7.62285	16.8895	41.3442	2.33217	1.8728	10.6351	15.6514	17.5456	14.7151	15.2599	20.0373	38.8816	42.9005	41.2848	42.3099
10869	HP1BP3	ENSGALG00000010079	1509	10.1995	0.00609828	0.0307015	214.545	368.08	289.509	184.066	90.9443	282.799	300.373	257.271	284.754	559.62	370.673	322.593	287.983	274.092	273.369
17429	TSC22D1	ENSGALG00000016971	2538	10.1852	0.00614199	0.0308956	188.614	119.719	283.497	172.676	250.762	165.89	165.13	93.3276	69.2262	124.741	191.583	264.9	273.017	293.558	302.512
10918	HSF3	ENSGALG00000040662	3666	10.0133	0.00669336	0.0331541	21.9247	7.02211	22.5926	45.0651	14.3491	14.8106	13.4739	12.5992	2.24578	1.62942	11.614	21.2098	20.1521	22.5321	26.4763
17743	USP16	ENSGALG00000015813	2495	9.95543	0.0068898	0.0339587	68.439	50.6418	59.5455	70.5379	57.7291	82.0838	63.4051	52.9743	33.3491	67.3913	48.8526	63.3439	58.6296	63.1941	53.0144
9486	EYA2	ENSGALG00000004508	1608	9.92502	0.00699534	0.034394	7.10326	0.785915	7.66131	10.0267	3.78322	8.64881	5.95425	0.883827	0.108937	0	2.1509	7.32415	9.07873	7.53547	6.7069
18244	ZMYND8	ENSGALG00000004542	2670	9.90959	0.00704952	0.0346319	74.667	85.6907	243.593	18.3902	82.9619	102.533	94.7826	87.4717	64.1636	90.4012	100.726	243.693	248.861	242.85	238.967
16932	TLE1	ENSGALG00000012575	2088	9.9087	0.00705267	0.0346332	15.3303	3.27063	25.5645	10.8305	3.51336	26.5511	20.4261	3.2898	0.671151	0.953614	8.16795	26.3221	24.5061	30.9975	20.4325
9938	FOXO6	ENSGALG00000026153	1596	9.83548	0.00731565	0.0356471	0.865001	0.125355	4.95556	0	0	0.596838	2.86317	0	0	0.277241	0.224179	4.28471	6.28278	3.88865	5.36611
15384	SCML2	ENSGALG00000016537	1827	9.69156	0.00786147	0.0376634	1.4129	18.8029	10.2338	0.171913	0	1.6684	3.81129	23.3365	0.76703	4.23828	46.8698	10.6744	10.0083	11.485	8.76762
3272	ELF1	ENSGALG00000016947	3231	9.62803	0.00811523	0.0386778	0.122119	0.501488	4.42813	0	0	0.35378	0.134696	0	0.271078	0	1.73488	3.25313	5.3398	4.16186	4.95773
13626	PBX3	ENSGALG00000000972	1068	9.62196	0.00813987	0.0387339	53.7462	92.3597	327.66	85.6773	18.261	52.9791	58.0676	163.677	18.3699	61.317	126.075	296.672	324.745	352.127	337.096
2660	DACH1	ENSGALG00000037015	2012	9.40594	0.0090683	0.0421312	93.2189	64.5053	90.3855	100.584	91.7743	91.9413	88.576	61.9241	31.5168	55.7494	108.831	79.9349	92.7859	96.3582	92.4632
13201	NR2F2	ENSGALG00000007000	1286	9.38599	0.00915922	0.0424789	35.9046	84.0486	157.636	12.6187	16.6959	80.293	34.0107	88.9627	55.4389	75.8679	115.925	160.709	177.388	144.207	148.239
13005	NFKB2	ENSGALG00000005653	2661	9.38533	0.00916224	0.0424789	9.19005	8.44198	3.05893	19.2	9.27905	2.72056	5.56064	2.49238	13.4949	11.0578	6.72285	2.66504	3.26951	2.6655	3.63566
3003	DPF3	ENSGALG00000009352	1269	9.28385	0.00963912	0.0442513	29.6823	9.5812	81.6235	40.0134	35.1081	17.7149	25.8926	1.86655	0.414115	4.18418	31.86	80.7323	89.4757	79.2991	76.9871
15272	RUNX1T1	ENSGALG00000033091	1764	9.27923	0.00966144	0.0442859	84.3361	56.6536	225.641	26.5892	110.458	101.735	98.5618	71.9727	15.392	99.8332	39.4164	233.245	214.921	231.873	222.523
12252	MEF2A	ENSGALG00000032366	5311	9.21236	0.00998992	0.0454784	42.8812	21.2908	27.6355	7.31346	107.873	21.3074	35.0308	28.6772	4.02387	20.9116	31.5506	26.0856	29.6532	27.6284	27.1746
16019	SMAD9	ENSGALG00000017050	1454	9.20342	0.0100347	0.0456139	0.706362	9.71285	9.2954	0	0	1.17923	1.64622	6.19043	29.2754	0.760792	2.62478	6.79346	9.63463	8.53685	12.2167
13608	PASK	ENSGALG00000006016	6338	9.17643	0.010171	0.0461101	0.200814	0.0235215	1.55861	0.528595	0	0	0.274662	0	0	0	0.094086	0.979049	1.76822	1.5854	1.90178
13135	NOTCH2	ENSGALG00000002922	9622	9.12161	0.0104536	0.0470843	6.95345	6.99095	25.6356	5.64712	3.96081	11.2857	6.92016	3.1756	4.46027	10.6228	9.70518	21.7686	28.7964	25.7697	26.2078
9932	FOXN2	ENSGALG00000008942	543	9.11217	0.0105031	0.0472049	2.55531	2.26907	38.0597	0	0	4.21018	6.01107	0	0.322598	0.407437	8.34624	32.8836	39.6487	40.2758	39.4305
3214	EGR1	ENSGALG00000007669	1284	9.00276	0.0110937	0.0492495	28.3884	14.2211	4.87664	3.34306	21.7385	14.2438	74.2283	42.7981	9.54979	1.37843	3.15807	3.74782	4.01957	6.67491	5.06428
160	ACTR8	ENSGALG00000005385	2102	8.92781	0.0115173	0.0507728	23.8989	71.7571	56.7429	9.81203	20.9398	23.7459	41.0978	13.973	160.087	54.415	58.5537	64.0414	51.7726	56.3799	54.7775
11695	LBH	ENSGALG00000009052	2705	8.9115	0.0116116	0.0510757	46.5744	39.5346	37.2644	40.2911	54.5702	37.5387	53.8974	40.1051	18.0675	54.5531	45.4127	37.3123	36.7425	37.4202	37.5828
11761	LHX5	ENSGALG00000008303	1209	8.83385	0.0120713	0.0526915	0.82728	17.7118	27.8569	0	0	3.30912	0	28.6041	0	30.0108	12.2321	29.0144	29.1506	28.6004	24.6621
10606	HABP4	ENSGALG00000012628	1752	8.81658	0.012176	0.0529556	40.3331	18.9246	17.8735	97.4045	20.6294	24.7925	18.506	34.6105	18.1969	0.631388	22.2598	16.5524	13.8876	25.3029	15.7512
771	ASCC1	ENSGALG00000026019	1796	8.78536	0.0123676	0.0536136	10.5961	34.6338	8.80738	0	0.996238	21.6393	19.7488	11.0783	92.1693	18.3544	16.9333	9.16637	9.44208	5.75936	10.8617
12635	MTERF3	ENSGALG00000040511	1083	8.78114	0.0123937	0.0536879	61.24	76.1736	46.7599	50.269	69.8845	56.2912	68.5151	76.9868	107.561	53.5221	66.6245	43.0308	48.4727	47.2096	48.3264
9440	ETS2	ENSGALG00000016059	1916	8.74411	0.0126252	0.0543375	1.52577	1.37602	15.2123	0.109285	0.65369	3.97726	1.36284	0	0.0914251	2.42485	2.98781	13.0206	14.1611	16.1188	17.5485
18214	ZFP92	ENSGALG00000015459	2078	8.7245	0.0127496	0.0546765	9.84654	1.19324	10.921	23.8309	0.344416	1.28352	13.9273	0.683924	0	2.02287	2.06616	12.7978	9.79286	10.0267	11.0668
12026	MAFG	ENSGALG00000031475	1591	8.64864	0.0132426	0.0562468	0.218063	1.66986	3.07224	0	0	0.598714	0.27354	0.744392	0.990908	2.92018	2.02396	2.54707	3.98542	3.06497	2.69149
1154	BPTF	ENSGALG00000038222	4992	8.59679	0.0135903	0.0574998	52.0438	42.9331	142.853	65.1197	18.3512	64.1142	60.5899	50.4383	26.7388	31.5548	63.0003	135.135	140.135	150.314	145.827
1654	CCNC	ENSGALG00000015471	731	8.43312	0.0147493	0.0611508	140.79	165.036	104.898	227.865	128.502	101.119	105.675	231.681	239.631	107.744	81.0861	104.636	113.773	105.722	95.4628
17420	TRPS1	ENSGALG00000031700	3306	8.36979	0.0152238	0.0626844	1.60663	3.3714	24.5313	0.0316681	0	3.63042	2.76444	0	0.582842	1.53917	11.3636	19.574	26.9408	26.9524	24.6581
13015	NFYA	ENSGALG00000003247	3522	8.30778	0.0157032	0.0641951	34.9757	18.1741	32.7966	23.6619	74.7804	19.9598	21.5006	20.5122	13.5282	17.5257	21.1301	31.5694	32.4062	32.2222	34.9889
16358	SSBP3	ENSGALG00000010774	1071	8.11658	0.0172785	0.0691719	150.139	234.269	169.074	226.008	73.8418	147.108	153.601	268.492	233.397	220.825	214.362	183.748	176.374	151.356	164.818
15286	RXRG	ENSGALG00000040730	1699	8.08345	0.0175672	0.0700932	3.13305	0.132761	1.30108	0.123243	0	2.80328	9.60568	0	0	0.39065	0.140393	0.670826	1.99623	1.04369	1.49357
810	ATAD2	ENSGALG00000034348	4011	8.02878	0.018054	0.0717726	0.597056	0.72513	7.42854	0	0.624518	0.949941	0.813765	1.29919	0	0.0551579	1.54617	7.04065	7.16899	8.03131	7.47322
14558	PTTG1	ENSGALG00000001506	643	7.90438	0.0192125	0.0756009	0.983646	6.66309	29.1629	0	0	0.888852	3.04573	0	21.2493	2.06443	3.33863	23.8306	31.4185	27.1178	34.2849
717	ARNT2	ENSGALG00000006445	1119	7.83389	0.0199018	0.0776246	36.9681	137.2	185.733	5.70723	13.911	55.3315	72.9225	169.129	6.57476	293.798	79.2958	178.356	188.971	199.006	176.598
817	ATF4	ENSGALG00000012135	1013	7.82819	0.0199586	0.077745	362.597	356.98	362.421	406.171	435.212	323.097	285.91	345.127	259.73	569.585	253.479	372.41	329.275	376.789	371.211
6237	ENSGALG00000037160	ENSGALG00000037160	1152	7.81618	0.0200788	0.0781374	1.16292	0.0997754	3.22908	0	0	0.496122	4.15557	0	0	0.192047	0.207055	1.9787	3.0721	5.3874	2.4781
12251	MED9	ENSGALG00000031214	1003	7.81171	0.0201237	0.0782865	53.9333	32.8268	29.9183	92.7953	67.7879	30.2006	24.9492	12.9886	57.6334	22.2782	38.4069	25.7567	27.1986	30.3493	36.3685
2423	CREM	ENSGALG00000007082	1559	7.80998	0.0201412	0.078329	1.7871	0.210375	2.94387	1.9475	0.80338	1.46641	2.93112	0	0	0	0.8415	2.43689	3.97264	3.12788	2.23808
10915	HSF1	ENSGALG00000036821	456	7.7325	0.0209368	0.0807676	2.26667	0.130771	7.89771	0	0	0	9.0667	0	0	0	0.523085	8.05367	8.08446	7.45325	7.99948
13853	PHF21A	ENSGALG00000008403	3548	7.72432	0.0210225	0.0810148	34.8592	17.0126	45.667	29.6852	58.0949	14.981	36.6757	24.6346	10.4174	9.60279	23.3955	44.9725	46.7153	46.7712	44.2091
16023	SMARCA2	ENSGALG00000010164	4647	7.72381	0.0210279	0.0810148	5.70647	4.94293	29.5256	1.44189	9.97232	6.35446	5.05722	5.7598	0.0753908	5.9035	8.03302	23.6542	30.3045	33.3251	30.8187
16847	TGFBRAP1	ENSGALG00000016795	2592	7.61469	0.022207	0.0846014	12.8947	46.0721	27.1622	2.18114	22.0894	5.73296	21.5754	5.57438	143.745	23.5578	11.411	24.4773	27.9333	29.1319	27.1061
13147	NPAS2	ENSGALG00000016774	2391	7.48207	0.0237296	0.0892429	0.33854	8.27311	4.51519	0	0	0.717104	0.637058	31.4038	0	0.0925296	1.59616	3.60155	3.63872	5.31498	5.50551
1773	CDCA7	ENSGALG00000040833	1487	7.41559	0.0245316	0.0916551	0.544499	2.51536	16.788	0	0	2.178	0	0.159291	0	7.73665	2.16551	15.5848	16.2633	15.9992	19.3048
12222	MEAF6	ENSGALG00000002013	1344	7.38675	0.0248879	0.0926108	82.9368	145.345	102.561	56.7876	34.8796	131.118	108.962	44.236	192.114	186.011	159.018	102.139	114.216	96.5335	97.3539
3120	E2F8	ENSGALG00000041299	3010	7.31734	0.0257668	0.0952894	2.3741	0.226177	7.86641	0	7.90596	0	1.59044	0.236079	0.232785	0	0.435846	6.56324	8.27935	7.56026	9.06276
13974	PKNOX1	ENSGALG00000016191	2042	7.27397	0.0263316	0.0968105	8.5532	3.95421	25.3288	10.3567	6.30879	7.74358	9.80375	5.10386	2.83086	2.27522	5.6069	23.5041	29.2466	26.196	22.3684
1822	CDK9	ENSGALG00000035576	2520	7.24781	0.0266783	0.097699	10.7088	23.6659	10.1984	4.15456	1.91705	18.9755	17.788	4.13575	34.4085	26.7769	29.3426	12.1109	12.1128	9.20623	7.36349
16526	SUPT4H1	ENSGALG00000000944	726	7.22753	0.0269501	0.0984202	90.8004	56.8321	61.8792	78.0164	54.4659	139.603	91.1166	48.6129	30.1602	79.2314	69.3239	63.8418	74.5428	54.9553	54.1768
165	ACVR2B	ENSGALG00000006158	1882	7.21934	0.0270608	0.0987731	39.9972	13.008	70.6169	63.9184	4.94371	53.5495	37.5772	12.46	0.186154	10.9326	28.4534	68.3651	71.3014	74.1199	68.681
13016	NFYB	ENSGALG00000041193	620	7.15222	0.0279843	0.101455	183.799	341.477	285.917	80.2098	219.904	173.611	261.472	306.779	495.563	360.048	203.517	324.15	324.176	242.865	252.478
13189	NR0B1	ENSGALG00000016287	1127	7.09845	0.0287469	0.103638	0.951649	14.7165	4.93329	3.25139	0	0.169042	0.386159	19.5461	2.17603	13.5452	23.5987	2.92153	4.97205	5.50691	6.33268
6978	ENSGALG00000040811	ENSGALG00000040811	891	7.03451	0.0296809	0.106065	0.0534542	2.97964	5.29919	0	0	0.213817	0	0	0	11.9186	0	4.54813	4.634	3.64861	8.36602
10786	HMGB3	ENSGALG00000009071	1957	7.02329	0.0298478	0.106442	536.395	570.668	636.021	428.088	459.608	640.552	617.332	500.359	427.051	567.284	787.98	708.701	653.589	625.28	556.512
9985	FUBP1	ENSGALG00000008939	1243	7.00393	0.0301381	0.107092	262.628	422.882	730.82	91.3027	101.194	378.876	479.142	359.205	335.826	475.404	521.094	777.651	763.758	699.376	682.496
12447	MN1	ENSGALG00000026119	2555	6.9935	0.0302956	0.107493	8.80384	2.38875	33.3568	0	9.66401	2.38604	23.1653	5.37699	0	2.6843	1.49371	28.103	32.6087	34.3541	38.3616
18036	XBP1	ENSGALG00000005796	1667	6.95967	0.0308125	0.108715	51.5483	61.051	45.2298	48.485	37.5666	58.3989	61.7427	42.3431	90.0546	68.8799	42.9263	46.3399	44.3178	44.4991	45.7623
1983	CHEK2	ENSGALG00000005695	1759	6.95132	0.0309415	0.109106	30.3291	48.5882	27.5754	26.5457	35.5	25.9935	33.2772	23.0267	114.822	20.5013	36.0028	30.3094	27.4969	23.102	29.3934
17740	USP13	ENSGALG00000008909	2675	6.93462	0.0312008	0.109682	1.62713	10.8301	8.91244	2.07433	0	1.42438	3.0098	13.2822	6.94133	14.8044	8.29271	8.99478	9.75721	8.89375	8.00403
3278	ELK3	ENSGALG00000043701	2954	6.90736	0.031629	0.110554	0.395976	3.47495	11.2369	0	0	0.25797	1.32594	0	13.2831	0.374473	0.242241	9.00263	11.5313	12.6559	11.758
1158	BRCA2	ENSGALG00000017073	9023	6.88521	0.0319813	0.111571	0.49143	3.37371	5.78884	0.0116031	0.138809	0.971239	0.844068	1.54883	0	7.47841	4.46759	4.92625	5.8507	6.41975	5.95864
12781	MYRF	ENSGALG00000041253	1723	6.83158	0.0328504	0.113959	1.78295	1.70954	19.0994	0	0.311534	0.884553	5.93571	2.06209	0	0	4.77607	14.9936	21.0536	19.6396	20.7108
9925	FOXJ2	ENSGALG00000014329	1787	6.75961	0.034054	0.11705	19.6306	62.311	35.5893	35.1522	1.30163	21.8549	20.2136	76.2158	90.1829	39.865	42.9802	31.3226	35.4005	37.2936	38.3405
12634	MTERF2	ENSGALG00000012639	1290	6.65336	0.0359121	0.12216	4.31887	0.161791	1.30877	0	0	11.3716	5.9039	0	0	0	0.647166	1.07985	1.0288	2.63464	0.491778
16195	SOX4	ENSGALG00000036497	1766	6.65162	0.0359433	0.122211	10.4049	5.56695	33.905	4.97982	2.12764	19.8494	14.6628	6.97452	1.58705	2.63081	11.0754	32.4839	36.7399	31.4615	34.9347
9443	ETV5	ENSGALG00000005768	2452	6.46471	0.0394644	0.131096	0.124987	0.427768	3.37627	0.426977	0.0729707	0	0	0	0.0714398	0.180455	1.45918	3.71854	3.60833	3.07349	3.1047
13071	NKX6-2	ENSGALG00000010500	1362	6.45911	0.0395752	0.131427	5.72764	1.74619	47.7661	0	20.4935	0.97913	1.43789	0	0	6.98477	0	51.9751	47.8543	46.8694	44.3656
12027	MAFK	ENSGALG00000004189	1401	6.45753	0.0396063	0.131494	30.7476	16.5638	15.7846	101.183	2.42652	8.97481	10.4063	2.1979	8.75227	35.215	20.0901	14.1009	16.9459	16.243	15.8485
3327	ENG	ENSGALG00000033039	1935	6.44785	0.0397986	0.131812	3.18861	0.107861	2.08367	0	0	8.36869	4.38575	0	0	0	0.431444	1.4398	2.1338	2.13826	2.62282
3155	EDF1	ENSGALG00000038003	1005	6.41946	0.0403675	0.133252	108.843	65.6687	76.716	51.2536	138.689	105.776	139.654	112.423	8.36635	38.5241	103.362	83.7946	89.5035	81.0155	52.5505
10847	HOXB3	ENSGALG00000043219	1450	6.41241	0.0405101	0.133588	4.12202	1.58009	21.9921	4.54881	0.493584	4.99269	6.45299	0.980133	0	5.34024	0	23.7553	21.3564	19.6685	23.1882
16017	SMAD6	ENSGALG00000025898	1268	6.3606	0.0415733	0.136325	0.20383	3.65238	1.30704	0	0	0.30049	0.514828	12.5158	0	2.09374	0	1.3982	0.814057	1.51498	1.50093
12229	MED13	ENSGALG00000005230	6546	6.31973	0.0424314	0.13857	25.3679	54.2434	71.5955	20.6639	9.53935	39.7552	31.5132	74.613	21.7558	70.5016	50.103	69.335	74.4512	71.8979	70.6981
804	ASXL2	ENSGALG00000016531	5412	6.26414	0.0436274	0.141435	0.798144	4.34497	6.84671	0	0.462849	1.16165	1.56808	5.51461	0.258936	3.47473	8.1316	6.6688	6.89348	6.49833	7.32624
16630	TAF1D	ENSGALG00000017220	1014	6.16883	0.0457569	0.146563	38.8276	8.75062	34.8586	110.683	0.352908	23.6729	20.6013	0.934381	0.172752	25.3093	8.58603	30.8475	38.5375	36.5779	33.4714
12164	MBTD1	ENSGALG00000002954	2814	6.1637	0.0458743	0.146773	9.61988	16.6737	48.8096	8.07348	0.763003	12.3216	17.3215	9.09079	10.5824	19.8124	27.2094	45.9475	54.2366	47.2608	47.7937
672	ARID2	ENSGALG00000033074	5545	6.12629	0.0467404	0.149067	24.8009	18.6281	58.7921	12.6502	37.3014	21.2327	28.0193	20.2906	3.85407	22.9019	27.4661	56.8896	57.628	62.7318	57.9191
1774	CDCA7L	ENSGALG00000035978	2243	6.09937	0.0473739	0.150486	13.4671	8.93541	54.546	0.980202	20.1021	13.6746	19.1116	5.1745	0.390483	1.6768	28.4999	48.9497	50.4246	53.7581	65.0515
13203	NR3C2	ENSGALG00000010035	3925	6.05783	0.048368	0.153036	2.27598	9.474	14.7572	0	1.23082	1.16491	6.7082	10.1988	4.23979	15.5571	7.90025	14.5512	16.6809	14.3816	13.4152
13620	PAXBP1	ENSGALG00000036833	2724	6.05617	0.0484083	0.153082	11.8237	26.0504	45.458	4.68898	2.9558	14.4072	25.243	23.3909	19.2919	34.6802	26.8387	44.5833	51.4272	46.0557	39.766
3127	EBF1	ENSGALG00000003699	1296	6.02108	0.049265	0.154851	39.7845	10.7065	83.5339	3.55446	30.9252	57.3296	67.3286	6.39683	0	34.3124	2.11656	78.2687	78.9643	95.8901	81.0124
15037	RNF141	ENSGALG00000029586	1336	5.96363	0.0507007	0.157709	98.8907	91.0997	94.4917	175.615	91.3371	72.5823	56.0289	108.327	44.4482	119.23	92.3935	94.409	92.1629	99.9873	91.4077
18210	ZFHX4	ENSGALG00000037164	10713	5.96001	0.0507926	0.157913	124.827	274.844	395.378	163.429	88.1344	146.693	101.051	339.257	312.978	196.477	250.661	427.502	393.022	373.043	387.946
9334	ENY2	ENSGALG00000036618	510	5.84613	0.0537686	0.164435	232.737	216.894	149.392	37.3617	540.983	121.777	230.827	317.678	37.4384	211.261	301.199	167.359	123.462	168.051	138.696
11334	KAT5	ENSGALG00000035748	5826	5.8039	0.0549161	0.167049	4.34529	7.81403	4.03741	1.68921	2.76402	8.37122	4.55669	7.88739	4.81072	10.5948	7.96318	4.43425	4.15097	3.01828	4.54616
12784	MYT1	ENSGALG00000005932	1710	5.79683	0.0551105	0.167426	27.2406	65.377	114.26	4.4082	47.8178	24.2873	32.4492	62.1945	43.2292	83.0614	73.0227	121.897	108.224	109.314	117.604
6017	ENSGALG00000036017	ENSGALG00000036017	4763	5.76392	0.0560249	0.169389	12.8951	31.9069	28.976	5.60512	1.12696	23.2389	21.6093	46.1	20.0436	27.4051	34.0788	30.2833	30.9906	27.4255	27.2045
10115	GATAD1	ENSGALG00000009399	995	5.71693	0.0573568	0.172719	21.7537	4.7551	17.5129	0.631326	66.175	11.6795	8.52907	5.71334	0.176051	2.2235	10.9075	15.7819	19.2662	18.2669	16.7365
2204	CNOT2	ENSGALG00000010042	1438	5.69693	0.0579333	0.173974	41.6251	17.6423	68.2682	97.7783	8.7098	22.7871	37.2252	17.4602	0.974523	18.4622	33.6724	68.162	68.1928	71.3154	65.4025
16730	TCEA1	ENSGALG00000015274	933	5.69329	0.0580389	0.174127	94.7064	64.8017	77.6756	100.655	106.818	82.4934	88.8595	51.2828	7.69774	118.8	81.4264	84.9676	79.025	78.715	67.995
14903	RFX3	ENSGALG00000010179	2519	5.65823	0.059065	0.17662	12.033	19.7729	60.4487	5.94338	13.4246	15.2015	13.5623	3.47917	34.8394	16.2482	24.525	48.5634	59.3004	74.559	59.3721
9337	EP300	ENSGALG00000011992	7242	5.63066	0.0598849	0.178582	26.8659	48.6913	85.559	8.38484	30.389	30.1997	38.4903	43.8604	80.1837	25.6309	45.0902	81.8541	84.9497	88.2491	87.1831
11333	KAT2B	ENSGALG00000011278	2250	5.59906	0.0608387	0.180393	9.54591	4.96623	27.8595	2.83839	3.97609	18.1197	13.2495	0.947462	0.622828	6.68632	11.6083	25.4962	28.2469	28.3716	29.3231
1178	BRMS1L	ENSGALG00000010093	1342	5.57446	0.0615916	0.18196	44.5317	39.2244	33.9774	71.2268	23.1988	57.9198	25.7813	54.0096	34.4598	23.9043	44.5238	35.481	37.909	30.6108	31.9088
2412	CREB3L2	ENSGALG00000012877	1599	5.54511	0.0625021	0.183779	1.14839	2.48336	14.7485	0	0	1.19144	3.40214	5.62907	0	0.276721	4.02766	14.81	14.202	14.5089	15.473
16731	TCEA2	ENSGALG00000005976	1735	5.53026	0.0629678	0.184831	66.1158	89.6694	58.1777	33.6713	71.3635	65.114	94.3146	138.433	9.59147	134.146	76.5073	57.7348	60.1741	58.7668	56.035
6228	ENSGALG00000037112	ENSGALG00000037112	1791	5.51999	0.0632921	0.185399	0.231649	0.977531	1.84614	0	0	0.319113	0.607484	0.39676	1.5649	1.48233	0.466133	2.05051	1.39968	1.89764	2.03672
678	ARID5B	ENSGALG00000031534	4354	5.41508	0.0667006	0.1926	7.85297	21.1753	31.25	0.408776	1.19173	21.6151	8.19626	11.5876	31.9845	18.3942	22.7351	26.4966	30.9552	35.0925	32.4555
3118	E2F6	ENSGALG00000016454	1637	5.35028	0.0688973	0.197117	29.3028	48.3844	28.4527	15.9249	28.0901	34.9134	38.2828	17.7975	19.7963	79.7377	76.2062	24.6002	31.2577	31.5035	26.4492
324	AHR	ENSGALG00000010836	4161	5.33112	0.0695604	0.198461	1.344	6.39482	10.2473	0.075483	0.344002	2.65552	2.30099	2.73241	0.0841963	6.53985	16.2228	7.03031	11.4467	11.1155	11.3965
13627	PBX4	ENSGALG00000034076	1443	5.29693	0.0707596	0.200999	46.5459	32.1704	39.2856	42.9517	33.6025	64.6918	44.9376	42.5143	15.1742	33.8834	37.1097	42.2123	39.9564	37.275	37.6987
12239	MED22	ENSGALG00000003204	1246	5.2482	0.072505	0.204317	61.5723	113.545	83.9913	7.73028	60.0244	91.7387	86.7958	90.1078	194.009	35.8669	134.195	80.698	80.2394	97.1289	77.899
11220	IRF6	ENSGALG00000001405	1472	5.23486	0.0729903	0.205298	1.48953	0.160914	0.546353	2.20485	0	3.75327	0	0.643656	0	0	0	0.258092	1.00177	0.602318	0.32323
13975	PKNOX2	ENSGALG00000043103	1434	5.2033	0.0741512	0.207929	7.83581	28.2458	10.023	2.70133	3.36887	13.2853	11.9878	56.1606	0	35.9474	20.8753	11.1271	8.4322	9.58333	10.9493
10706	HESX1	ENSGALG00000005506	887	5.20002	0.074273	0.208173	0.445607	1.32896	5.91585	0.354098	0.201718	0	1.22661	0	0	4.24019	1.07566	5.13972	6.48361	6.49716	5.5429
16848	TGIF1	ENSGALG00000014795	801	5.17489	0.075212	0.209872	0.950815	3.32189	23.3988	0	0	0	3.80326	13.0113	0	0.276203	0	21.5014	21.7233	23.2445	27.1261
4753	ENSGALG00000029653	ENSGALG00000029653	1647	5.17245	0.0753037	0.209981	0.780975	0.785774	7.69342	0	0.217273	0	2.90663	0	0	1.47761	1.66549	8.61162	8.14749	7.1776	6.83697
12263	MEIS2	ENSGALG00000039118	2114	5.15666	0.0759006	0.211007	397.161	396.805	959.149	382.181	255.352	457.442	493.668	364.934	333.106	427.302	461.878	867.649	867.953	1059.83	1041.17
3029	DR1	ENSGALG00000005858	1459	5.03427	0.0806906	0.22094	54.7792	81.8362	61.6995	27.268	93.0799	61.632	37.1368	103.74	116.46	59.8966	47.2476	55.2898	62.0568	62.4903	66.9613
16015	SMAD3	ENSGALG00000035701	1286	5.02263	0.0811614	0.221884	0.980245	1.54935	9.98166	0	0.55653	2.51841	0.846037	0	0	2.58054	3.61685	8.27178	10.0906	10.3415	11.2227
3316	EMSY	ENSGALG00000000830	1635	4.96752	0.083429	0.225807	111.402	87.6956	107.864	192.165	42.7886	102.188	108.468	71.4218	122.244	105.545	51.5714	99.838	105.522	114.058	112.037
15577	SFPQ	ENSGALG00000002514	1283	4.94312	0.0844529	0.227652	374.757	613.592	696.492	241.459	316.29	408.046	533.232	666.104	339.418	705.1	743.746	717.083	726.614	670.546	671.725
3174	EED	ENSGALG00000014060	1488	4.92057	0.0854106	0.22951	33.9751	20.0707	15.3878	2.88474	65.7739	47.4996	19.742	2.22857	47.6774	10.259	20.1177	14.9786	16.9461	14.5981	15.0285
3627	ENSGALG00000005464	ENSGALG00000005464	5583	4.91472	0.085661	0.229978	26.7045	38.3233	76.3173	11.6453	14.4537	34.5328	46.1861	22.995	43.675	34.436	52.1871	80.0923	79.5543	78.2119	67.4107
10541	GTF2B	ENSGALG00000006205	1460	4.86842	0.0876671	0.233615	63.4206	36.6186	92.0223	26.8908	85.5405	58.98	82.271	41.8571	18.8368	43.7931	41.9873	102.697	101.909	86.0298	77.4525
10747	HIRA	ENSGALG00000033598	2092	4.83781	0.0890188	0.236292	6.44898	6.16782	27.4466	2.00181	0.684223	9.37983	13.7301	4.30253	0.753601	10.8927	8.72242	22.0949	29.323	26.9826	31.3861
12262	MEIS1	ENSGALG00000041626	1188	4.8284	0.0894387	0.237144	43.4414	81.7568	170.511	5.552	12.5006	78.4173	77.2959	75.1669	10.6164	133.525	107.719	168.21	158.88	171.526	183.429
11452	KDM1A	ENSGALG00000033469	2514	4.7988	0.0907722	0.239869	35.5958	40.6324	103.374	7.95414	22.8459	41.3	70.2831	47.5804	19.7885	38.8971	56.2635	108.201	107.809	98.6301	98.8559
12416	MLX	ENSGALG00000003199	2314	4.73517	0.093707	0.245418	37.3905	19.2408	39.6692	23.2102	36.6509	64.2171	25.4839	6.55116	22.5587	24.0934	23.7599	42.7413	41.1029	35.697	39.1355
4227	ENSGALG00000016327	ENSGALG00000016327	2413	4.73106	0.0938994	0.245709	30.3649	22.17	67.3243	15.7932	16.6096	48.4764	40.5803	18.749	12.2685	27.4141	30.2483	65.1816	68.0164	67.5462	68.5529
4750	ENSGALG00000029635	ENSGALG00000029635	696	4.67214	0.0967067	0.251193	9.74296	2.37515	21.6889	0.451271	4.1132	28.4671	5.94025	1.02097	4.02691	2.2251	2.22762	19.1047	20.5513	22.7173	24.3822
10547	GTF2H5	ENSGALG00000013733	1263	4.6619	0.0972033	0.252305	90.5179	146.267	128.267	80.8215	100.441	97.5934	83.2155	155.847	267.541	78.3005	83.3805	133.756	146.06	127.645	105.607
11927	LRRFIP2	ENSGALG00000033102	1278	4.65998	0.0972967	0.252449	40.9825	27.969	28.8026	97.1581	11.3403	17.292	38.1397	41.1457	1.91893	52.107	16.7043	28.4388	30.1152	27.8656	28.7909
12451	MNT	ENSGALG00000005830	1942	4.64752	0.097905	0.253477	22.8186	28.0446	20.0485	22.373	11.3325	30.1168	27.4522	40.372	31.1194	18.4555	22.2314	20.3454	19.4387	21.3816	19.0285
16633	TAF4	ENSGALG00000005121	3306	4.64666	0.0979468	0.253477	3.41063	1.76279	10.8	0.126673	1.89424	7.6066	4.01502	1.93447	0.264928	2.54297	2.30879	9.5763	10.7942	10.5485	12.2811
11069	IKZF5	ENSGALG00000032289	5139	4.64021	0.0982633	0.254186	5.92985	7.27845	25.457	0.203726	5.70998	9.97225	7.83346	3.08815	1.43163	14.0346	10.5594	25.5295	27.5753	24.5275	24.1956
9939	FOXP1	ENSGALG00000007769	1852	4.62272	0.0991261	0.25559	8.8513	40.6544	29.536	0	23.2833	8.94948	3.17236	18.2893	53.3456	57.8182	33.1645	21.8127	30.9731	32.474	32.8843
3122	EAF1	ENSGALG00000033379	780	4.50817	0.104969	0.266104	11.315	3.57017	10.3085	22.4154	17.8924	0.488489	4.4636	0.607348	0.89831	2.83639	9.93862	8.44246	12.0993	11.7457	8.94657
4260	ENSGALG00000016823	ENSGALG00000016823	1522	4.50368	0.105206	0.266446	6.68498	2.88253	16.0544	12.7257	5.29014	5.00685	3.71723	1.40065	2.53203	3.05257	4.54486	13.4791	15.9862	17.7672	16.9852
17824	VGLL4	ENSGALG00000004937	903	4.45672	0.107705	0.270902	61.689	46.3886	217.654	2.66665	2.17959	157.81	84.1004	75.5452	45.199	17.3953	47.4148	191.568	237.929	226.317	214.802
13630	PCBD1	ENSGALG00000027835	312	4.44565	0.108302	0.272107	143.906	114.652	64.5465	2.01336	102.079	259.51	212.021	56.9388	272.862	58.8551	69.9526	57.6361	69.004	63.9384	67.6076
18262	ZNF341	ENSGALG00000002968	2523	4.25876	0.118911	0.290951	2.75809	12.0493	7.46499	0	0	6.11628	4.91607	0.281647	30.9655	11.7503	5.19975	7.22779	8.4163	6.7354	7.48046
2417	CREBRF	ENSGALG00000002878	1771	4.24928	0.119476	0.291818	2.27125	13.8661	15.9059	0	1.11133	4.41047	3.5632	0	16.1224	38.6012	0.740767	13.9437	15.7369	15.8532	18.0897
14357	PRKCQ	ENSGALG00000034970	2555	4.2477	0.11957	0.291969	0.68194	0.431776	5.42759	1.84394	0	0.372819	0.511	0	0	0	1.7271	4.55992	5.59831	5.84135	5.71078
16013	SMAD1	ENSGALG00000009977	1789	4.24111	0.119965	0.292634	14.9551	53.3958	75.2298	2.63347	27.3037	12.2464	17.6367	124.854	1.07707	35.9868	51.6653	72.4145	79.6238	75.7429	73.1379
10549	GTF2IRD1	ENSGALG00000001263	3165	4.14751	0.125713	0.30168	35.8597	43.2449	38.6827	38.7354	11.5891	40.9312	52.1829	42.1344	30.8831	49.7699	50.1924	40.4518	36.1546	36.8838	41.2406
12237	MED20	ENSGALG00000003474	1009	4.12882	0.126893	0.303298	21.6806	46.6539	25.7572	7.57455	3.01458	56.077	20.0564	5.86882	57.8115	52.8429	70.0924	29.2432	23.8217	23.8715	26.0925
15578	SFR1	ENSGALG00000008383	1691	4.08423	0.129754	0.307152	0.743186	0.269443	2.67499	0.681043	0.634858	0.112662	1.54418	0	0.725129	0	0.352642	1.64755	3.92414	2.97111	2.15716
11457	KDM3B	ENSGALG00000007663	5605	4.05263	0.13182	0.310309	10.8046	18.429	35.9444	6.0893	8.87439	11.2505	17.0043	6.59251	15.1575	19.8147	32.1511	34.6134	36.9375	37.6211	34.6058
13202	NR3C1	ENSGALG00000032992	1244	4.05148	0.131896	0.310399	3.28046	1.42069	15.909	0	0	4.9006	8.22125	0	0	0.889222	4.79355	14.8625	16.5952	14.9669	17.2112
9406	ERN2	ENSGALG00000027592	3733	4.02201	0.133854	0.313495	0.198079	0.0479226	0.43097	0.0280458	0.239652	0	0.52462	0	0	0	0.19169	0.441007	0.592529	0.435429	0.254913
986	BACH1	ENSGALG00000015828	2298	4.01787	0.134131	0.31396	22.8823	34.8804	22.7143	11.5265	12.302	34.6534	33.0473	24.9441	7.08914	53.7211	53.7672	21.547	25.4751	23.4064	20.4287
12253	MEF2C	ENSGALG00000014645	1542	4.00149	0.135235	0.315458	1.21377	0.924463	10.2503	0	3.24895	1.60612	0	0	0	3.15645	0.541403	9.69077	10.6149	10.9245	9.77097
16094	SNAPC5	ENSGALG00000007695	1814	3.9868	0.136232	0.316834	57.1799	74.0328	58.5383	36.7644	28.7028	89.4791	73.7731	145.462	22.5964	42.0768	85.9959	55.8487	64.5445	59.4659	54.2941
16622	TAF10	ENSGALG00000046371	591	3.97829	0.136812	0.317602	47.002	35.1306	21.3134	36.1383	29.0638	24.4988	98.3069	89.7764	0.296397	25.8299	24.6195	24.856	24.452	18.5024	17.4431
1220	BZW1	ENSGALG00000008220	1227	3.96095	0.138004	0.31974	521.307	491.794	650.302	451.801	307.394	637.054	688.98	504.618	238.843	670.747	552.966	688.505	666.758	623.832	622.114
13191	NR1D2	ENSGALG00000011291	2205	3.93909	0.13952	0.321549	18.1885	7.06844	11.9023	58.6386	0	6.22076	7.89481	13.8574	0	1.70569	12.7106	11.3141	11.1682	13.4031	11.7241
10807	HNF4G	ENSGALG00000042621	1365	3.93258	0.139975	0.322226	2.31264	5.61153	1.34146	0	0	7.81582	1.43473	6.42053	6.28817	9.56269	0.174745	1.48439	1.29636	1.19081	1.39427
11771	LIMD1	ENSGALG00000035623	1178	3.91567	0.141164	0.32409	1.10313	12.3422	14.5403	0	0	4.0431	0.369441	0	49.3689	0	0	11.0727	18.5265	14.4256	14.1365
13002	NFIL3	ENSGALG00000015209	2075	3.88983	0.143	0.326676	17.4006	7.71162	18.7326	24.824	2.84554	20.7496	21.1833	15.2964	1.68839	5.75753	8.10417	17.7597	18.477	21.649	17.0445
12386	MITF	ENSGALG00000039583	1230	3.88869	0.143081	0.326676	3.931	4.65331	22.4153	0	0.436401	11.9263	3.36131	5.96978	0.56966	4.31685	7.75697	21.6209	22.8984	22.7059	22.4359
13317	NUP133	ENSGALG00000011091	1023	3.85086	0.145813	0.330896	18.8749	60.6385	70.943	4.81003	21.5129	25.1407	24.0361	125.726	2.91095	44.5504	69.3663	71.5505	73.8024	68.0343	70.3848
2409	CREB1	ENSGALG00000008494	1420	3.83073	0.147288	0.332828	38.5871	40.8061	110.03	14.9669	13.7343	49.6401	76.007	28.1903	25.6588	43.7803	65.5949	118.878	104.365	111.555	105.323
275	AEBP2	ENSGALG00000038026	798	3.83053	0.147303	0.332828	49.9459	33.8002	41.7399	122.669	31.8387	19.0988	26.1775	7.4206	56.195	40.2	31.3851	40.308	42.3164	45.1824	39.1527
319	AHCTF1	ENSGALG00000010630	8043	3.79495	0.149947	0.337211	7.32767	13.5663	23.4589	2.46019	7.65261	10.351	8.84688	14.4599	4.24695	14.6062	20.9523	22.0745	25.246	22.8919	23.6231
325	AHR1B	ENSGALG00000004322	2895	3.7393	0.154178	0.343924	2.60563	0.303001	1.04609	0	0	4.93551	5.487	0	0	0.305683	0.90632	1.26856	1.17154	0.867727	0.876537
10116	GATAD2A	ENSGALG00000042900	1677	3.73731	0.154331	0.344033	9.16581	25.1709	36.8899	0.12486	3.52087	18.7443	14.2732	9.18083	22.2488	48.4165	20.8373	35.6426	40.888	33.4837	37.5453
11335	KAT6A	ENSGALG00000003641	5925	3.724	0.155362	0.345114	18.7819	25.9827	58.6539	2.77419	24.9135	22.2825	25.1572	38.3782	12.2398	20.2008	33.112	59.5675	58.2625	58.4591	58.3267
15277	RUVBL2	ENSGALG00000036359	669	3.698	0.157395	0.348145	0.349933	0.572921	2.27938	0.156495	0.26745	0	0.975788	0	0	0.3307	1.96098	0.757172	3.08587	2.42968	2.84481
15285	RXRA	ENSGALG00000042055	1919	3.6918	0.157883	0.348968	0.616831	0.403967	3.93102	0	0	1.78697	0.680357	0	0	0	1.61587	4.02546	3.91896	3.23413	4.54555
13004	NFKB1	ENSGALG00000012304	4027	3.68729	0.158239	0.349466	0.782094	2.31276	6.36864	0.961934	0.666467	0.85155	0.648425	2.58805	5.87236	0.494449	0.29616	5.50322	6.07859	7.11873	6.774
16102	SNIP1	ENSGALG00000002010	906	3.66615	0.159921	0.352198	3.45634	7.6661	23.4	0.462229	0	5.67747	7.68568	2.09153	0.580035	7.32577	20.6671	22.3641	21.8098	25.4436	23.9823
16301	SPTY2D1	ENSGALG00000006355	2293	3.62562	0.163195	0.356564	6.04359	21.8865	21.7414	11.232	1.48258	1.4955	9.96427	32.5393	15.9663	18.2355	20.8048	21.8701	22.2509	22.233	20.6116
773	ASCC3	ENSGALG00000015465	7009	3.60206	0.165129	0.359632	14.9284	8.56036	21.0283	24.3476	7.19884	15.0038	13.1635	17.5731	0.399876	5.20821	11.0602	20.2901	20.8494	23.1067	19.8672
16725	TBX6	ENSGALG00000006374	1356	3.58947	0.166172	0.360884	0.316113	0.185143	1.41679	0	0	1.26445	0	0	0	0.652621	0.0879524	1.8678	0.761227	1.63461	1.40353
12997	NFE2L1	ENSGALG00000011937	2664	3.51182	0.17275	0.370417	49.8421	49.5662	40.6556	47.8672	16.9924	51.2748	83.2339	43.5676	2.56443	93.2623	58.8707	43.4483	42.2898	35.3891	41.4951
10663	HDAC9	ENSGALG00000010854	1133	3.50482	0.173356	0.370986	4.40094	2.28345	19.7981	0	0	11.2659	6.33789	0.627181	0.927646	0	7.57896	19.0011	21.0844	18.3896	20.7172
13733	PDLIM1	ENSGALG00000005422	1034	3.49719	0.174019	0.371608	30.2446	12.1388	31.0537	20.5542	40.1455	21.5568	38.722	1.37446	0.508232	35.9459	10.7268	30.7407	34.6547	28.2962	30.5233
2071	CIR1	ENSGALG00000014276	1383	3.49059	0.174594	0.37226	82.3502	102.317	95.5819	105.073	36.3541	87.7479	100.225	113.552	69.6629	158.53	67.5222	95.5042	110.462	86.2252	90.1362
52	ABCG1	ENSGALG00000016164	2010	3.47732	0.175755	0.374142	2.45266	0.370844	2.61343	1.09383	0	3.41213	5.30469	0	0	0	1.48338	2.96116	2.2009	3.16122	2.13043
9422	ESR2	ENSGALG00000011801	3529	3.4619	0.177116	0.376211	0.931105	0.0838997	0.782089	0	0	2.86117	0.86325	0.335599	0	0	0	0.681809	0.752137	0.795581	0.898829
12868	NCOA1	ENSGALG00000016617	4622	3.45669	0.177578	0.376724	2.34062	7.91436	8.42015	0.0226514	0.193557	1.89604	7.25022	6.50842	4.85111	1.77106	18.5269	9.20598	8.32696	8.15254	7.99511
18256	ZNF302	ENSGALG00000034134	3405	3.45144	0.178045	0.377276	1.9134	0.560294	3.97334	0.922422	1.05095	0.951155	4.72906	0.069564	0	0	2.17161	5.02085	3.81102	3.42841	3.63309
12869	NCOA3	ENSGALG00000004570	4341	3.44803	0.178349	0.377624	55.3246	47.5677	69.4983	40.8795	46.7404	58.5883	75.09	61.4945	27.3994	32.0059	69.3712	66.3962	73.5774	71.4165	66.6033
9442	ETV4	ENSGALG00000036678	1593	3.43391	0.179612	0.379227	0.538028	0.205885	1.78369	0	0	1.19592	0.956187	0	0	0	0.823539	1.82841	1.85136	1.76247	1.69251
12230	MED13L	ENSGALG00000008238	6741	3.42331	0.180567	0.379713	16.0489	22.1419	45.5168	2.20541	10.0862	23.4005	28.5034	32.0108	13.4866	13.4889	29.5814	43.3395	46.3754	45.4859	46.8666
300	AGO2	ENSGALG00000040957	2547	3.39904	0.182771	0.381687	4.28887	12.0647	18.079	0.164421	1.68598	2.91712	12.3879	1.85996	6.25854	25.6244	14.5158	17.7501	18.9319	19.3196	16.3144
13013	NFX1	ENSGALG00000043724	2866	3.39889	0.182785	0.381687	4.90014	6.32204	19.7411	0.730599	1.93533	5.8496	11.085	8.8432	0.733442	10.8844	4.82713	18.8232	21.7126	20.0565	18.3722
11222	IRF8	ENSGALG00000005757	1641	3.3982	0.182848	0.381687	0.198904	2.87075	3.12317	0	0	0	0.795615	0	0	0	11.483	3.31834	4.13357	2.4313	2.60948
13209	NR6A1	ENSGALG00000001073	1442	3.38865	0.183723	0.38287	0.83966	3.22839	4.42352	0	0	1.84962	1.50902	3.94228	1.94364	2.14795	4.87971	3.77628	5.62436	3.89405	4.3994
13196	NR2C2	ENSGALG00000008519	1914	3.37316	0.185152	0.384754	27.3216	22.0051	66.5329	25.8729	17.3876	26.5759	39.4501	24.3796	17.755	25.1985	20.6873	60.1426	74.0385	69.6382	62.3124
15560	SETD7	ENSGALG00000009800	1245	3.35084	0.18723	0.387075	26.305	31.3593	92.9785	5.55009	40.3837	24.3303	34.9559	12.5567	28.4212	27.366	57.0932	94.7997	90.6083	97.2069	89.2992
10548	GTF2I	ENSGALG00000021665	2602	3.35047	0.187264	0.387075	42.3803	74.5623	68.9972	40.8398	14.3717	36.5353	77.7743	17.9333	192.068	21.5116	66.7362	71.1542	72.9369	69.9091	61.9887
16014	SMAD2Z	ENSGALG00000036001	1281	3.32977	0.189212	0.389453	14.4821	38.0274	36.4106	18.5525	9.21858	10.113	20.0444	51.0343	47.8608	23.1428	30.0719	27.3836	30.6202	57.6771	29.9616
16829	TFEB	ENSGALG00000039878	1647	3.26484	0.195456	0.398767	0.391	0.467908	2.38533	0.127134	0	0.115671	1.32119	1.58198	0	0	0.28965	3.38314	2.05926	1.88412	2.21479
16882	THRB	ENSGALG00000011294	1092	3.25624	0.196299	0.399669	0.298902	2.27111	2.20434	0	0	0	1.19561	0	0.160413	0.405199	8.51882	2.08742	1.62045	1.62383	3.48568
10368	GPBP1	ENSGALG00000014724	1538	3.23729	0.198167	0.401685	4.82037	17.8348	26.3588	0	0	7.67988	11.6016	15.8629	5.80864	4.45929	45.2084	21.9021	25.1201	40.1608	18.2522
12022	MAF1	ENSGALG00000032777	1568	3.21832	0.200055	0.404101	221.847	403.528	285.804	179.277	69.607	385.517	252.989	640.957	11.7302	466.04	495.384	285.095	269.153	274.805	314.162
1115	BMI1	ENSGALG00000041267	3022	3.20918	0.200972	0.404977	14.5377	28.2005	27.1622	4.60768	22.9132	16.5168	14.1131	16.1464	49.0964	21.6699	25.8891	28.5373	25.7153	27.5783	26.8179
10369	GPBP1L1	ENSGALG00000010276	1442	3.20314	0.20158	0.405665	66.6533	111.162	134.085	40.2226	46.158	96.1801	84.0524	112.355	116.011	101.567	114.715	136.648	138.768	125.532	135.392
17431	TSC22D3	ENSGALG00000027069	1152	3.18148	0.203775	0.408367	13.7794	17.1184	7.89431	16.813	1.08721	10.5839	26.6334	33.3092	0.456173	15.5558	19.1525	8.46445	8.44826	6.54185	8.12266
3348	ENSGALG00000000106	ENSGALG00000000106	3655	3.16172	0.205798	0.411321	10.5306	20.53	23.4086	6.38768	6.26602	10.8938	18.5749	25.9224	32.0147	8.71637	15.4667	21.6547	23.4	24.5405	24.0393
2419	CREG1	ENSGALG00000040426	1835	3.14466	0.207561	0.413603	8.38214	24.2481	13.26	17.0593	0	1.76495	14.7044	2.06531	84.5782	3.13471	7.2143	11.1799	17.9203	10.6297	13.3102
16202	SP3	ENSGALG00000031796	2721	3.1005	0.212195	0.419613	7.3981	12.4407	33.9195	7.84923	3.02481	8.96191	9.75645	28.2045	0.579395	8.61862	12.3603	30.8099	35.9303	33.6159	35.3218
15036	RNF14	ENSGALG00000043085	534	3.06421	0.21608	0.423921	87.3675	42.9642	106.121	189.784	5.69609	103.461	50.529	28.8319	56.0939	10.7719	76.1589	106.242	112.667	96.5755	108.999
14190	POU3F3	ENSGALG00000033739	597	3.04137	0.218562	0.427282	11.5253	34.6067	15.9713	3.8581	2.09794	9.89251	30.2527	52.3723	0	41.5054	44.549	18.0304	16.5492	13.366	15.9395
12998	NFE2L2	ENSGALG00000009240	2556	3.01884	0.221038	0.430437	17.0373	29.4948	26.8614	12.7387	14.3503	26.1617	14.8983	11.5838	73.1933	23.5434	9.65866	27.2002	28.2691	26.5359	25.4403
4419	ENSGALG00000023632	ENSGALG00000023632	681	3.01296	0.221689	0.431355	5.65252	1.60114	9.57536	2.15232	0	13.4281	7.02969	0.34782	0.257225	4.22335	1.57617	8.36808	8.44488	8.67952	12.809
16781	TEF	ENSGALG00000011958	927	3.00128	0.222988	0.432251	55.4488	35.3733	65.2177	39.5288	47.8675	71.7241	62.6746	32.9619	18.3296	36.0378	54.1639	61.4743	70.4693	61.6899	67.2375
13625	PBX1	ENSGALG00000003429	1168	2.98587	0.224712	0.434695	26.4519	23.7566	85.9375	0.179272	11.7955	51.5423	42.2906	26.9718	3.89934	24.4347	39.7204	77.7386	86.9866	86.2828	92.742
3533	ENSGALG00000003862	ENSGALG00000003862	1215	2.96714	0.226826	0.437655	36.8048	36.728	31.9996	61.0074	18.8496	38.8861	28.4761	3.50912	53.4883	36.4178	53.4968	28.6627	34.9536	33.4456	30.9365
16711	TBPL1	ENSGALG00000013981	1049	2.94656	0.229173	0.440381	43.3782	44.8708	43.6949	79.9434	32.7488	27.4234	33.3973	59.6115	28.054	68.9656	22.8522	48.1679	44.5615	43.9503	38.0999
2467	CSDC2	ENSGALG00000030101	1586	2.92104	0.232116	0.443928	68.9891	99.2966	79.9974	43.3698	58.3252	57.7778	116.484	81.9919	14.1373	200.593	100.464	87.033	96.0447	65.3127	71.5993
3115	E2F3	ENSGALG00000012680	687	2.91695	0.23259	0.444198	1.46902	1.25231	8.95645	0	4.68797	0.554616	0.633481	0	0	0.322036	4.68721	6.26733	9.87364	8.60371	11.0811
15555	SETD2	ENSGALG00000042051	7362	2.88187	0.236707	0.449481	9.10424	15.329	27.0844	6.17191	4.86075	9.8076	15.5767	10.1348	5.21086	28.8794	17.0909	27.0751	28.102	26.555	26.6054
7673	ENSGALG00000044014	ENSGALG00000044014	2022	2.86682	0.238494	0.451514	4.86932	16.486	12.9235	0.828446	0	7.34908	11.2997	41.3519	0.693058	12.6922	11.2068	15.72	13.2	11.4006	11.3733
13611	PATZ1	ENSGALG00000006934	1339	2.86431	0.238793	0.451635	8.25128	14.725	41.1927	7.58432	0	14.3701	11.0507	14.1518	3.66301	12.2268	28.8584	40.3839	41.8484	42.2669	40.2714
15574	SFMBT1	ENSGALG00000001753	2926	2.81507	0.244746	0.458641	2.05222	0.872633	6.96494	0	0.489198	6.90162	0.818048	0	0	2.79761	0.692918	6.57854	7.91228	6.91877	6.45017
11460	KDM5B	ENSGALG00000038948	5447	2.79713	0.246952	0.461403	5.93783	8.41506	21.6919	0.0768826	0.492723	11.1571	12.0246	5.60963	5.08113	12.5911	10.3783	22.226	22.1719	20.5905	21.7792
2468	CSDE1	ENSGALG00000002139	4136	2.78811	0.248068	0.462262	102.425	161.591	197.519	108.669	59.9154	117.687	123.426	135.041	163.058	179.088	169.178	198.712	205.325	200.252	185.786
11310	JMJD1C	ENSGALG00000002942	7565	2.768	0.250575	0.465125	26.8823	40.3134	55.8514	14.4206	21.4993	33.0655	38.5439	42.019	41.0545	35.2987	42.8812	56.1287	55.5341	55.2009	56.5419
16828	TFDP2	ENSGALG00000025759	1527	2.75022	0.252812	0.467552	42.7248	36.7451	106.543	33.0471	54.8373	43.5417	39.4731	38.004	2.63845	63.4593	42.8786	112.621	96.4723	104.803	112.276
15102	RORA	ENSGALG00000003759	4373	2.72053	0.256593	0.47249	8.51395	5.69522	20.408	1.9153	6.792	14.2023	11.1463	2.32911	8.05151	7.79115	4.60908	19.4314	21.0417	20.8492	20.3099
14185	POU1F1	ENSGALG00000015495	3298	2.7178	0.256943	0.472873	5.75455	3.22479	2.38451	14.5709	0	3.23487	5.21239	11.8505	0	0	1.04871	2.49588	1.69906	2.55392	2.78918
14187	POU2F1	ENSGALG00000015446	2337	2.70728	0.258299	0.474364	66.4493	46.4536	83.2352	132.067	3.67495	64.3188	65.7365	65.475	14.6163	59.6406	46.0825	82.8532	75.4024	84.2225	90.4628
16497	SUB1	ENSGALG00000003248	3762	2.69611	0.259746	0.475781	115.734	160.859	187.34	90.7522	59.6414	141.389	171.154	200.788	204.319	95.4465	142.882	168.479	167.765	255.865	157.249
14827	RBPJ	ENSGALG00000014365	1176	2.68127	0.261679	0.477745	5.67366	9.65164	29.146	0	0	8.26194	14.4327	8.86232	8.78831	6.96073	13.9952	27.1365	29.2163	30.1569	30.0743
15383	SCMH1	ENSGALG00000000672	1620	2.67392	0.262643	0.478556	19.9517	31.9101	19.0081	8.27219	1.76715	36.4557	33.3117	71.7907	3.02764	32.5029	20.319	18.292	17.5678	18.2431	21.9296
2067	CIITA	ENSGALG00000007171	3367	2.6492	0.265909	0.482526	0.33253	1.1262	0.346372	0	0.0531406	1.01847	0.25851	4.1506	0	0	0.354213	0.225667	0.262775	0.614423	0.282623
5603	ENSGALG00000033770	ENSGALG00000033770	850	2.57551	0.275889	0.493904	1.60001	5.72143	16.7088	0	0	0	6.40002	17.8346	0	0	5.05116	13.7066	15.093	23.2953	14.7403
2491	CSRNP1	ENSGALG00000027905	1713	2.57413	0.276079	0.49395	17.0917	13.8685	13.2928	6.96743	36.3489	16.7934	8.25689	17.8375	0.613557	14.4651	22.5577	9.75837	16.1837	12.5082	14.721
12025	MAFF	ENSGALG00000012277	1805	2.56567	0.27725	0.495675	2.41191	1.1973	1.05061	5.33625	0	2.7442	1.56721	0.131227	2.32914	2.32883	0	1.96445	1.14374	0.654931	0.439331
13852	PHF20L1	ENSGALG00000033205	4975	2.55962	0.27809	0.496604	26.8102	38.3937	44.9905	9.57511	14.278	37.0682	46.3194	38.9935	43.3085	28.194	43.0787	43.9093	40.9926	48.3256	46.7347
10773	HLF	ENSGALG00000003059	1890	2.54838	0.279657	0.498627	4.3858	1.59894	8.36593	0.276971	0.378676	10.7855	6.10203	2.63184	0.185366	0.234115	3.34442	5.82932	9.12851	9.69488	8.81102
10117	GATAD2B	ENSGALG00000038200	6797	2.54706	0.279842	0.498671	8.18729	7.95054	8.45185	5.23705	9.79253	6.41856	11.301	9.30456	7.03568	5.7938	9.66811	9.40881	8.91663	8.43523	7.04674
16313	SREBF2	ENSGALG00000041687	4159	2.53776	0.281147	0.500178	9.93741	18.4883	16.1842	7.07364	3.14053	12.322	17.2134	23.977	6.23352	22.2355	21.507	16.412	15.5651	14.5317	18.2279
11146	ING2	ENSGALG00000010659	726	2.53145	0.282035	0.501266	3.85541	12.7315	9.64316	0	3.20388	6.8227	5.39506	36.215	7.72101	3.04736	3.94259	9.94257	11.9837	8.34507	8.30129
15325	SAP130	ENSGALG00000002070	3000	2.48727	0.288334	0.50851	43.9202	53.5836	56.3252	19.8222	40.079	43.2459	72.5336	63.3221	31.5307	67.9202	51.5616	52.681	52.9875	54.8715	64.761
816	ATF3	ENSGALG00000025887	550	2.48359	0.288866	0.508774	3.77992	0.928641	5.60706	0	0.325317	12.8162	1.97819	0	0	2.41351	1.30106	3.22349	7.50709	5.64208	6.05557
15329	SAP30L	ENSGALG00000028994	459	2.4421	0.294921	0.515197	43.8306	26.7674	36.1212	11.6328	125.52	11.6216	26.5482	47.9924	1.52654	18.316	39.2348	27.038	38.2305	41.2079	38.0083
858	ATP1B4	ENSGALG00000008593	969	2.42006	0.298189	0.518789	1.00107	5.43826	3.81162	0.108044	0.553945	3.34229	0	19.5555	0	0.228316	1.96926	2.87514	5.32624	2.13495	4.91017
12363	MIER1	ENSGALG00000011118	1945	2.40869	0.299889	0.520764	11.5124	20.5741	39.8853	0.915071	6.25545	27.1319	11.7471	40.3098	6.03415	13.0809	22.8716	36.7866	43.7454	40.1141	38.8953
676	ARID4B	ENSGALG00000034003	968	2.40233	0.300844	0.521347	100.755	176.58	226.095	80.0353	105.913	108.048	109.025	235.887	135.721	173.928	160.784	220.437	227.589	231.728	224.626
14864	REL	ENSGALG00000007845	1782	2.39842	0.301432	0.521855	23.9772	15.3123	43.9875	20.3867	10.5427	29.0791	35.9005	9.03864	15.4331	11.5461	25.2314	40.2225	46.4228	46.8515	42.4531
3117	E2F5	ENSGALG00000038915	1767	2.39745	0.301579	0.522034	13.1815	31.1578	27.5626	22.989	8.50574	6.57677	14.6545	2.81504	106.47	4.00658	11.3391	23.077	29.2084	27.1788	30.7862
12246	MED31	ENSGALG00000030401	962	2.36419	0.306636	0.526754	26.0506	17.9729	28.9541	34.0639	25.1089	28.5172	16.5123	9.11021	6.91942	13.3387	42.5232	24.3533	33.5695	28.8779	29.0159
12407	MLLT1	ENSGALG00000001596	1665	2.3287	0.312125	0.532596	26.124	47.2496	57.568	2.07503	22.1372	40.1617	40.1222	42.6785	59.4422	34.9464	51.9315	52.252	57.0358	55.735	65.2492
15328	SAP30BP	ENSGALG00000002415	1905	2.32389	0.312877	0.53365	24.2119	38.8909	31.1928	1.15412	30.8069	35.302	29.5846	37.799	31.5399	63.8746	22.3502	31.3767	33.3625	31.7257	28.3063
3431	ENSGALG00000001948	ENSGALG00000001948	2583	2.28239	0.319438	0.540226	22.5836	39.1541	58.2417	15.686	7.68896	30.3135	36.6459	59.2393	21.7692	31.6055	44.0023	67.02	55.6617	56.0068	54.2783
13398	ONECUT2	ENSGALG00000035751	1362	2.28144	0.319589	0.540254	2.49177	8.48161	3.69761	0	0	2.93739	7.02969	7.99986	0	15.5939	10.3327	4.83489	3.6811	3.36331	2.91113
2143	CLOCK	ENSGALG00000013793	3544	2.24019	0.326249	0.547111	4.18584	2.78028	13.2989	0	10.2488	2.68779	3.80678	0.46785	0.0494273	1.24852	9.35531	13.5785	12.649	14.8853	12.0828
14518	PTP4A3	ENSGALG00000040969	522	2.23655	0.326843	0.547801	73.451	86.2714	60.8233	34.2966	5.82704	127.372	126.308	44.0152	30.5374	183.941	86.5917	50.9459	67.798	58.3149	66.2346
12713	MYCN	ENSGALG00000016462	1326	2.19428	0.333824	0.554899	6.41495	2.76813	10.7547	13.7382	0	6.17795	5.74361	0.357263	0.132104	3.83747	6.74567	9.4548	14.1233	8.91516	10.5254
11707	LCORL	ENSGALG00000014421	1577	2.17416	0.3372	0.557518	25.7039	52.5896	68.0515	4.24887	33.0165	43.6109	21.9395	36.9492	23.9929	86.4191	62.9971	61.9935	72.0004	68.2154	69.9965
4111	ENSGALG00000014184	ENSGALG00000014184	1281	2.17076	0.337774	0.558074	5.12054	9.22639	36.1577	0	2.93318	17.549	0	17.1963	0	1.55437	18.1549	44.9803	49.1535	0.230708	50.2661
12240	MED23	ENSGALG00000040607	4107	2.16474	0.338791	0.5581	20.6706	15.289	35.685	27.7096	6.49129	26.8116	21.67	25.5494	3.41213	8.67285	23.5216	33.7945	37.2332	37.9226	33.7895
3299	ELP3	ENSGALG00000016624	2070	2.1357	0.343747	0.561831	8.50755	25.785	17.5298	0	0	17.9467	16.0835	37.99	0.846234	39.0106	25.2931	17.9249	19.5189	17.2754	15.4001
16635	TAF5	ENSGALG00000008241	4036	2.13439	0.343973	0.562104	19.3165	30.236	33.8196	11.4397	25.9786	19.6836	20.1642	18.0173	54.1223	25.4896	23.3149	34.0125	34.4903	38.4433	28.3324
9347	EPC1	ENSGALG00000007169	1467	2.13363	0.344102	0.562104	137.9	123.039	244.223	199.327	89.889	140.903	121.483	121.581	92.8989	125.323	152.352	239.117	240.742	254.541	242.492
16880	THRA	ENSGALG00000040017	1137	2.12154	0.346189	0.564494	3.77153	0.942577	5.05711	0	0.629461	12.7342	1.72243	0.8333	0	0	2.93701	5.1234	4.53925	4.2888	6.27698
16419	STAT3	ENSGALG00000003267	2256	2.1139	0.347515	0.565289	12.7603	6.7564	12.9261	6.54343	11.8172	11.6536	21.027	5.45967	0.0776465	11.1796	10.3087	12.7984	13.4649	12.5761	12.865
16745	TCFL5	ENSGALG00000045499	1542	2.08301	0.352923	0.570446	4.9181	1.12027	7.78928	0	0	7.53641	12.136	0	0.227199	0	4.25388	7.63764	7.55473	6.70805	9.25671
18078	YBX1	ENSGALG00000004848	684	2.07172	0.354922	0.571931	1566.21	1757	3359.28	817.049	1288.05	2039.08	2120.65	1766.45	893.779	2050.66	2317.09	3717.46	3537.33	3170.33	3011.98
15239	RSF1	ENSGALG00000039068	4275	2.06861	0.355473	0.572353	45.5344	46.6692	101.022	48.9556	38.4635	63.4144	31.304	42.054	16.8819	38.2445	89.4964	103.502	99.6178	102.695	98.2753
11650	L3MBTL2	ENSGALG00000011976	2889	2.0568	0.357578	0.573484	7.74807	4.40126	11.5414	9.67585	3.28245	7.18784	10.8461	2.45966	0.121267	7.42822	7.59587	12.6681	10.6168	12.8895	9.99131
12996	NFATC3	ENSGALG00000003396	721	2.02352	0.363579	0.578693	120.701	77.7209	155.245	25.847	242.454	121.546	92.9557	185.616	16.7639	27.6164	80.8874	149.119	151.347	167.854	152.659
10655	HDAC1	ENSGALG00000003297	1428	2.0029	0.367346	0.58206	9.68667	5.68746	24.163	0.879789	3.13243	18.2773	16.4572	0	0.122668	5.42251	17.2047	26.0723	23.4409	23.5933	23.5454
18111	YY2	ENSGALG00000017388	2610	1.96784	0.373843	0.58789	13.2863	20.7387	39.2748	1.32373	12.0654	14.7445	25.0116	23.7773	7.31555	18.7332	33.1287	36.7781	36.3849	42.8586	41.0776
1082	BHLHE40	ENSGALG00000008308	1098	1.95231	0.376757	0.591419	0.684955	1.41738	3.80132	0.286052	0	2.25559	0.198179	3.23587	0	2.21641	0.217238	3.22936	4.16328	3.76824	4.0444
13854	PHF21B	ENSGALG00000014218	1257	1.94459	0.378213	0.592653	15.2489	9.28989	33.7779	0.749605	16.654	19.7028	23.8893	17.5247	3.34454	1.58405	14.7063	35.5631	32.8472	35.0319	31.6692
12785	MYT1L	ENSGALG00000016384	3576	1.93957	0.379165	0.593328	73.417	100.932	163.722	28.7208	50.1849	116.246	98.5167	68.026	70.2445	166.671	98.7859	164.316	162.388	170.827	157.357
13399	ONECUT3	ENSGALG00000028081	1287	1.9388	0.37931	0.593328	9.55289	6.43388	4.58526	1.871	0	17.9113	18.4293	2.39258	2.04161	10.8299	10.4715	4.52626	5.38512	4.36303	4.06662
3823	ENSGALG00000008653	ENSGALG00000008653	5295	1.92079	0.382741	0.596748	13.9835	21.0266	45.7245	20.8994	8.68433	13.8161	12.5341	34.9371	15.9126	9.65176	23.6049	41.1839	43.5837	49.3679	48.7626
17263	TP53INP1	ENSGALG00000041353	1145	1.9115	0.384523	0.597904	25.0823	43.5173	77.809	10.9724	21.0959	19.7998	48.4613	14.6877	124.991	10.434	23.9568	90.692	74.0523	80.1436	66.3481
13240	NSD2	ENSGALG00000015705	4188	1.90266	0.386228	0.599292	41.4806	54.1562	103.83	34.9983	33.1531	42.4873	55.2835	44.6244	56.6753	50.3967	64.9285	102.386	99.293	107.757	105.884
10546	GTF2H3	ENSGALG00000023682	1291	1.87053	0.392482	0.604877	24.6745	38.7062	64.8603	3.48713	4.85077	28.3331	62.0272	46.9695	28.2227	46.0985	33.5342	68.6645	66.8199	60.3208	63.6359
2078	CITED4	ENSGALG00000000678	1947	1.85753	0.395042	0.607235	1.70123	1.13743	6.21724	0	0	2.44621	4.35872	0	0	0.568152	3.98157	6.04892	6.66489	5.31269	6.84246
716	ARNT	ENSGALG00000000751	2307	1.84216	0.398089	0.610275	3.26184	2.56016	10.0838	0.0907628	4.80854	1.73417	6.41389	2.66949	0.07593	0.671291	6.82392	11.0883	11.825	7.10981	10.312
13014	NFXL1	ENSGALG00000014138	2661	1.83398	0.399721	0.611914	3.50523	5.71823	12.7644	2.00655	0.941353	4.93996	6.13305	3.47154	12.7708	2.32795	4.30263	12.183	12.2468	14.8269	11.801
9937	FOXO4	ENSGALG00000005658	1587	1.81787	0.402954	0.615291	0.617293	1.31621	3.5907	0	0	1.92071	0.548458	0.149254	0	4.73983	0.375751	3.43125	3.99547	3.53826	3.39782
923	ATXN3	ENSGALG00000010766	1306	1.81716	0.403097	0.615432	24.1438	34.6161	71.2408	3.28675	10.5491	25.0902	57.6492	6.34785	12.608	59.9681	59.5404	67.585	77.4563	74.2238	65.6981
11549	KLF10	ENSGALG00000037913	1380	1.78011	0.410634	0.622757	0.564457	0.30248	1.47227	0.227598	0	0.138051	1.89218	0	0	0	1.20992	2.47768	1.06856	0.963709	1.37912
925	ATXN7L3	ENSGALG00000030899	1113	1.77159	0.412385	0.623968	4.62065	14.1997	17.6226	0	0.321517	5.64856	12.5125	18.9407	0	11.9266	25.9315	18.7737	15.3688	15.4009	20.947
12238	MED21	ENSGALG00000027435	1127	1.76391	0.413973	0.625789	35.5134	66.5997	75.1502	2.78691	37.944	49.1913	52.1315	82.1778	30.6199	75.1857	78.4154	75.0608	83.3473	74.0811	68.1114
16858	THAP1	ENSGALG00000015385	630	1.75116	0.416621	0.628472	1.01241	4.93769	3.37091	1.32946	0	0.302398	2.41779	0	0	16.1539	3.59683	1.60809	3.2769	6.33295	2.26569
9933	FOXN3	ENSGALG00000010665	958	1.74294	0.418337	0.63021	49.7198	38.3298	62.7418	146.223	2.42799	2.98294	47.2453	44.0105	22.6734	25.6341	61.0011	57.8987	60.9545	67.7145	64.3995
10837	HOXA2	ENSGALG00000040521	843	1.72307	0.422513	0.634034	44.6277	76.2754	84.1581	25.9564	10.4001	40.4524	101.702	18.5446	117.196	57.7372	111.624	75.2611	71.7187	87.1187	102.534
2059	CHURC1	ENSGALG00000042309	505	1.72003	0.423156	0.634735	34.6717	49.8183	30.252	16.1707	4.96028	52.0603	65.4957	39.8685	1.38749	69.2191	88.7981	34.355	33.5801	25.7498	27.3229
13997	PLAG1	ENSGALG00000015407	1626	1.71026	0.425228	0.63625	6.37685	15.5027	21.0575	0	2.31083	19.4494	3.74712	20.977	4.30924	10.6129	26.1118	19.237	19.4982	24.719	20.7758
12247	MED4	ENSGALG00000016995	1113	1.70016	0.427381	0.637559	29.028	22.9628	38.3783	68.8559	10.2885	28.7563	8.21135	17.0254	19.988	35.9786	18.8593	41.0745	35.2422	37.4401	39.7565
17750	USP3	ENSGALG00000003427	1524	1.69702	0.428053	0.637847	46.2422	75.9856	124.487	32.3565	50.2491	41.2523	61.111	62.3249	33.218	97.1184	111.281	115.336	131.979	124.401	126.233
158	ACTR5	ENSGALG00000003559	2161	1.68234	0.431206	0.640236	2.53065	1.86023	7.64094	0.0484474	1.73874	5.1132	3.22222	0.109609	0	0.819022	6.5123	8.61436	6.20959	8.54748	7.19234
16528	SUPT6H	ENSGALG00000000146	5204	1.66455	0.435058	0.643776	19.9516	30.412	42.4725	11.1052	15.5063	21.7088	31.486	45.1064	21.1726	26.1031	29.2658	43.1938	42.079	40.5484	44.0686
14202	PPARA	ENSGALG00000041470	2116	1.64576	0.439164	0.64766	1.72624	4.24925	9.89395	0	0.591904	2.61097	3.70209	0	0	0.313665	16.6834	10.174	11.0805	9.77676	8.54452
12095	MAPK14	ENSGALG00000042833	510	1.63445	0.441656	0.649582	11.5813	26.4361	32.1033	1.02642	0	32.4989	12.8	14.8622	36.7515	19.521	34.6098	29.7969	30.0704	32.1614	36.3843
1850	CEBPG	ENSGALG00000032365	2361	1.61611	0.445724	0.653387	21.7076	23.2315	55.4672	1.68505	11.1401	34.3742	39.6308	22.272	27.4515	14.0558	29.1465	50.3115	57.3354	60.1465	54.0753
18313	ZNF777	ENSGALG00000038657	1740	1.61363	0.446276	0.653674	1.05169	1.62885	0.536955	0	0	2.9562	1.25058	0	0	5.21309	1.3023	0.655019	0.33899	0.424623	0.729188
10819	HNRNPKL	ENSGALG00000040086	1774	1.61348	0.446312	0.653674	12.1837	21.0899	60.7263	0.295081	15.5323	32.5393	0.367983	7.61067	0.789946	33.6721	42.2868	77.4527	85.6169	0	79.8356
12235	MED18	ENSGALG00000028149	1416	1.5784	0.454208	0.659995	42.7437	28.6735	34.8953	1.03512	41.9512	30.4064	97.5822	46.5033	7.66989	32.8108	27.7102	29.334	27.9092	51.7608	30.5772
1169	BRF2	ENSGALG00000003124	1886	1.55646	0.459218	0.664655	2.16382	6.00814	3.72539	0	2.46661	2.72735	3.46131	21.7273	0.0928794	0.821139	1.3912	5.10308	3.44023	2.74226	3.61598
7428	ENSGALG00000043121	ENSGALG00000043121	5597	1.55215	0.460209	0.665391	1.31582	2.0761	1.19992	0.261877	0.223775	0.85095	3.92669	7.02513	0.500755	0.671977	0.106542	0.65615	0.500581	1.71609	1.92687
12016	MAD2L2	ENSGALG00000004640	1446	1.54986	0.460736	0.665687	12.4454	7.49472	24.1633	4.12698	1.73232	31.8835	12.0388	2.1295	5.45136	11.016	11.382	25.8353	22.0273	22.6865	26.104
14707	RALGAPA1	ENSGALG00000010088	6522	1.54944	0.460832	0.665745	62.9959	79.2507	100.381	60.3416	44.2784	76.7651	70.5985	77.3209	63.6275	83.8548	92.1997	98.3854	101.088	103.225	98.8261
15599	SGF29	ENSGALG00000020590	1107	1.53391	0.464426	0.669565	22.8489	26.1894	21.5083	12.9568	18.5874	36.6565	23.195	26.1044	1.58239	46.3661	30.7047	21.8497	21.7128	18.688	23.7826
4253	ENSGALG00000016732	ENSGALG00000016732	1136	1.52431	0.466661	0.671091	3.24211	1.64116	7.00738	0	6.14265	3.18636	3.63945	2.71061	0	0.389504	3.46452	6.35414	6.49034	8.06485	7.12017
10916	HSF2	ENSGALG00000038420	1629	1.51722	0.468317	0.672134	44.1099	66.4311	75.494	18.4453	42.2872	47.7154	67.9919	25.8822	68.6057	99.4147	71.8216	68.2549	89.617	71.5713	72.5327
9441	ETV1	ENSGALG00000035504	1931	1.50773	0.470544	0.673523	13.3134	11.9603	38.3111	2.27715	16.03	22.8889	12.0576	26.9862	0	10.5406	10.3143	33.3807	42.9171	41.6293	35.3171
15683	SIN3A	ENSGALG00000001644	3850	1.49098	0.474503	0.677027	4.11754	3.36289	11.8399	0.0271935	0.697108	8.90699	6.83888	0.922853	0	7.35546	5.17325	10.2625	13.6353	12.6275	10.8341
11551	KLF12	ENSGALG00000016926	1373	1.46491	0.480728	0.681774	14.9068	19.9651	52.3571	7.09149	0	30.6649	21.871	42.0941	0.637911	10.6349	26.4933	47.8693	51.4447	53.1666	56.9476
18081	YEATS2	ENSGALG00000036356	4369	1.45325	0.483538	0.684032	10.5535	10.9587	25.3934	6.27834	4.01341	15.785	16.137	8.24069	6.77588	17.5715	11.2466	20.6955	26.1237	26.0768	28.6777
1571	CCAR1	ENSGALG00000004108	2782	1.429	0.489437	0.68895	59.934	89.3945	115.661	57.9171	59.6843	64.6449	57.4898	68.7949	112.96	84.8531	90.9694	106.654	119.951	117.918	118.122
11219	IRF5	ENSGALG00000039982	1996	1.42055	0.49151	0.690256	0.190782	0.37106	0.781079	0	0	0	0.763129	0	0	0.886727	0.597512	1.01513	0.812659	0.740325	0.556207
9936	FOXO3	ENSGALG00000015297	4402	1.4189	0.491914	0.690581	3.19876	8.00652	7.77809	0	1.86972	1.3849	9.54042	23.7296	0.159174	1.96009	6.17721	7.88245	7.63767	7.48579	8.10646
13838	PHB	ENSGALG00000038604	739	1.40754	0.494717	0.692362	140.262	154.485	145.07	5.66684	153.986	159.06	242.335	246.802	40.7704	191.9	138.468	160.395	161.229	128.173	130.484
17761	USP42	ENSGALG00000003378	3836	1.40349	0.49572	0.693326	18.4854	30.1368	48.6517	18.5863	2.23889	23.789	29.3273	38.5925	18.3116	34.6045	29.0386	42.9826	47.0521	52.3123	52.2597
2532	CTR9	ENSGALG00000005618	3498	1.37582	0.502625	0.69866	60.0148	70.9462	88.3113	75.8424	24.3988	66.6624	73.1556	58.5731	111.122	52.2421	61.8479	90.0361	88.1897	85.8816	89.1379
15056	RNF20	ENSGALG00000015548	3374	1.36419	0.505557	0.700704	51.4493	70.7632	84.2722	41.2698	39.4015	57.0854	68.0405	121.522	44.1301	52.7851	64.6158	71.9511	76.1341	120.046	68.9578
3119	E2F7	ENSGALG00000031340	2772	1.35502	0.50788	0.702299	2.20855	1.06563	5.05751	0	0	5.22324	3.61098	0.0854493	0	2.15492	2.02214	5.16233	5.958	3.73154	5.37815
11605	KMT2A	ENSGALG00000006818	11748	1.33861	0.512065	0.705452	15.9824	19.7383	38.7684	8.19878	19.1596	18.3084	18.2631	16.1701	26.4515	14.1805	22.1512	38.2239	38.0325	40.288	38.5291
10659	HDAC3	ENSGALG00000002634	2553	1.32945	0.514414	0.707253	12.5431	21.5156	17.0786	1.02521	6.37764	24.7	18.0695	26.6277	0.686136	40.2961	18.4524	18.2044	15.8839	16.1486	18.0776
16542	SUV39H2	ENSGALG00000013920	4254	1.32606	0.515288	0.707405	5.93382	6.07173	16.6931	2.55954	5.55195	5.59799	10.0258	1.00225	9.26501	8.94523	5.07444	17.7423	17.4707	15.0061	16.5533
10658	HDAC2	ENSGALG00000014991	1195	1.32067	0.516677	0.708181	252.298	345.975	540.349	126.335	258.13	298.6	326.128	440.035	282.032	274.002	387.831	585.497	562.448	517.747	495.703
18079	YBX3	ENSGALG00000031890	1070	1.3168	0.51768	0.708837	15.0201	35.0699	58.5392	9.49103	23.0762	13.8877	13.6255	32.5413	0.163711	85.3939	22.1808	56.4541	59.9489	53.7215	64.0322
11332	KAT2A	ENSGALG00000003369	3344	1.3094	0.519598	0.710548	10.3341	14.2428	11.944	5.47895	0.963109	13.1603	21.734	11.5458	4.24306	22.9575	18.2248	11.8912	12.0385	11.1357	12.7106
803	ASXL1	ENSGALG00000006612	282	1.27356	0.528992	0.7175	58.3738	120.39	164.456	24.5031	2.53793	72.9615	133.493	31.0781	13.6658	320.09	116.726	164.359	181.973	154.581	156.911
18307	ZNF711	ENSGALG00000006929	2235	1.2714	0.529565	0.717634	42.8057	66.3104	100.995	31.9472	36.9857	43.387	58.9031	92.5206	32.8396	83.051	56.8302	97.1167	97.1195	108.694	101.049
12470	MORF4L1	ENSGALG00000008146	942	1.24412	0.536838	0.723078	569.522	591.555	875.27	550.259	477.891	703.393	546.543	814.948	396.272	667.943	487.056	946.685	886.016	860.573	807.808
3123	EAF2	ENSGALG00000011657	1683	1.2192	0.543568	0.728118	3.61721	2.26528	7.47573	2.67491	5.63457	3.05632	3.10304	3.37776	0	5.25819	0.425182	7.14825	7.88559	7.98988	6.87919
772	ASCC2	ENSGALG00000008059	2790	1.21911	0.543594	0.728118	4.0578	1.7402	7.11533	0.037525	0.833697	8.80856	6.55142	0	0	6.10586	0.854935	7.67084	6.39525	7.57381	6.82143
2203	CNOT10	ENSGALG00000011494	2214	1.20355	0.547839	0.731225	9.42137	14.0087	28.1054	2.50625	12.0414	7.3141	15.8237	25.1416	3.40214	17.6871	9.80395	27.8556	28.9726	27.2978	28.2956
162	ACVR1B	ENSGALG00000029599	2512	1.18865	0.551936	0.734403	2.88465	3.91109	9.66175	0	1.2821	4.01953	6.23696	0.282881	2.3012	8.45497	4.60532	9.27596	10.0968	9.23555	10.0387
1547	CBFA2T2	ENSGALG00000003096	1895	1.17244	0.556426	0.737501	1.46787	3.58971	2.35803	0	0	1.508	4.3635	10.9996	0	2.91871	0.440551	2.20529	3.03481	2.18339	2.00863
17384	TRIP4	ENSGALG00000030672	1812	1.17108	0.556806	0.737769	1.96552	3.93788	6.08623	0.115557	1.87614	1.78735	4.08302	0.784323	5.51033	1.95354	7.50333	7.05868	5.20832	7.17641	4.90149
5649	ENSGALG00000033971	ENSGALG00000033971	1068	1.17062	0.556935	0.737858	2.16573	1.47263	0.916829	0	0	6.42171	2.24121	3.99212	0	0	1.89839	0.237148	0.966502	0.830162	1.6335
16421	STAT5B	ENSGALG00000003282	2337	1.14644	0.563708	0.743004	1.53633	0.377197	1.37405	0	0	0	6.14534	0	0	0.284003	1.22478	1.40888	1.32506	1.20137	1.56087
10660	HDAC4	ENSGALG00000004288	3491	1.12404	0.570057	0.748375	16.0176	21.3796	37.4082	4.88836	9.89183	29.4689	19.8216	31.6183	15.9565	18.9488	18.9947	33.337	38.1007	40.1697	38.0254
14206	PPARGC1B	ENSGALG00000043389	3235	1.12094	0.57094	0.749171	0.447755	1.14183	1.75341	0	0	0.176671	1.61435	4.31996	0	0.136778	0.1106	1.64413	1.91448	1.69009	1.76493
15103	RORB	ENSGALG00000015150	2029	1.1153	0.572553	0.750255	0.939915	1.55298	5.48608	2.57996	0	0	1.1797	0.23348	0	0.218076	5.76038	4.30653	5.81412	6.11758	5.7061
15700	SIX4	ENSGALG00000017389	2628	1.10615	0.575179	0.752399	2.53965	2.48536	1.25539	0	0	8.9166	1.24201	1.17171	0	7.40829	1.36145	1.06013	1.06612	0.843429	2.05188
9348	EPC2	ENSGALG00000012453	4118	1.10371	0.575879	0.752775	22.4505	32.7896	41.6637	13.3983	19.6391	22.2062	34.5583	40.8964	22.545	28.4741	39.2428	41.4538	42.6483	41.2662	41.2864
987	BACH2	ENSGALG00000015605	2475	1.10142	0.576541	0.752775	29.1874	41.8008	62.0556	4.06089	16.9888	37.4094	58.2906	74.7442	20.7374	25.6547	46.067	61.0927	62.3803	67.5259	57.2236
5563	ENSGALG00000033614	ENSGALG00000033614	1491	1.08779	0.580483	0.756181	0.950894	1.04049	3.51995	0	0.720017	0.894416	2.18914	0	1.76228	0	2.39967	3.65217	2.67031	4.45982	3.29748
4451	ENSGALG00000024295	ENSGALG00000024295	411	1.06549	0.586991	0.760447	5.57523	5.14288	4.57048	1.52839	4.35339	11.1247	5.29442	9.22104	0	6.99781	4.35268	4.00555	4.30542	6.11209	3.85884
2416	CREBL2	ENSGALG00000037030	1585	1.06104	0.5883	0.761507	36.3866	46.8101	52.6717	29.1957	49.7827	31.0106	35.5575	17.933	61.4478	84.3079	23.5517	61.4409	55.1698	47.5471	46.5289
8686	ENSGALG00000045667	ENSGALG00000045667	801	1.05794	0.589212	0.761836	0.942961	1.9892	1.3669	0	1.56363	1.66489	0.543323	2.66141	0	0.828608	4.4668	1.89718	1.10457	1.47584	0.990002
18311	ZNF767	ENSGALG00000036870	2815	1.03155	0.597039	0.767896	1.98314	4.37098	3.54752	0	1.39834	4.06062	2.47361	1.93531	1.24455	3.45808	10.846	3.91382	3.03827	4.25196	2.98604
12249	MED7	ENSGALG00000003870	950	1.00348	0.605477	0.77347	47.8111	37.4424	56.941	25.5676	37.8566	64.3726	63.4478	62.333	17.517	53.0972	16.8224	67.1842	51.9993	58.3298	50.2506
16628	TAF1B	ENSGALG00000016437	1642	0.996596	0.607564	0.774285	7.52603	15.2216	21.3198	0	9.04428	9.39791	11.6619	2.45232	12.5884	23.9832	21.8625	21.5175	19.847	22.8583	21.0563
15078	RNF6	ENSGALG00000017105	1927	0.994271	0.60827	0.774691	19.425	35.8297	41.9809	14.2889	32.5908	11.9625	18.858	8.60435	37.9975	62.8009	33.9161	44.8191	45.1488	39.1085	38.8471
10732	HIF1A	ENSGALG00000011870	6563	0.990279	0.609486	0.775497	65.2998	75.2472	100.038	25.747	90.0755	74.4568	70.92	55.1471	90.6947	76.589	78.558	94.5484	99.6477	106.926	99.0303
16027	SMARCB1	ENSGALG00000005983	1589	0.959141	0.619049	0.781524	46.5588	59.3849	69.6033	19.1732	50.5582	59.9467	56.557	45.0179	51.9228	58.3379	82.261	69.1761	71.7351	63.1435	74.3586
12225	MED1	ENSGALG00000001708	4752	0.95882	0.619148	0.781567	17.5053	30.9085	35.2382	23.1774	7.79405	21.6489	17.4007	53.0355	6.96701	36.1747	27.4567	33.8178	35.4067	34.0814	37.6471
10033	GABPA	ENSGALG00000015763	4248	0.93784	0.625678	0.785938	18.1403	18.2801	29.5926	30.955	23.6712	11.1221	6.81283	17.8987	20.8654	14.1138	20.2422	26.025	29.1589	32.3853	30.8012
17430	TSC22D2	ENSGALG00000027591	3567	0.931661	0.627614	0.787179	13.7915	23.0793	20.0207	0.029351	0.451449	31.5648	23.1205	21.5815	4.41978	29.7714	36.5447	19.2423	20.4634	19.3462	21.0308
9927	FOXK2	ENSGALG00000001577	1734	0.931281	0.627733	0.787179	65.9944	65.8521	126	98.1137	43.0285	46.9135	75.9218	42.073	10.1021	128.354	82.8791	104.8	122.033	134.389	142.775
15352	SBNO1	ENSGALG00000003392	5548	0.929512	0.628288	0.787628	18.7895	30.8054	45.3775	24.6829	15.6736	12.0529	22.7485	19.4257	35.9308	37.6839	30.1813	41.1091	47.2044	49.0876	44.1091
16369	SSRP1	ENSGALG00000007520	2547	0.92769	0.628861	0.788092	8.97266	13.4002	16.7022	0.287736	0.983486	13.688	20.9314	18.2276	14.374	10.5103	10.4888	18.8439	18.0635	14.2721	15.6294
16417	STAT1	ENSGALG00000007651	801	0.923668	0.630127	0.788755	105.646	97.6818	158.965	87.1804	96.7219	107.742	130.941	59.7339	57.078	154.95	118.966	161.577	157.034	166.77	150.48
12410	MLLT3	ENSGALG00000015078	3070	0.920808	0.631029	0.788916	17.7365	24.8952	40.4858	4.16051	10.3158	24.0776	32.392	42.5895	5.24941	22.9166	28.8252	35.5574	39.6751	47.6037	39.1072
10803	HNF1A	ENSGALG00000006968	1830	0.919464	0.631453	0.789084	2.11181	0.69991	2.17959	0	0	8.32834	0.118908	0.388304	0	0	2.41134	2.49122	2.09507	2.74543	1.38665
7988	ENSGALG00000044521	ENSGALG00000044521	1740	0.897348	0.638474	0.79326	0.465075	0.52005	0.400406	0	0	0.109489	1.75081	0	0.906054	0.762891	0.411253	0.291119	0.33899	0.424623	0.546891
673	ARID3A	ENSGALG00000026231	6628	0.887994	0.641467	0.795468	0.731194	0.740367	0.670572	2.02187	0	0.114973	0.787933	2.03702	0	0.834484	0.0899694	0.706935	0.889925	0.535071	0.550356
6957	ENSGALG00000040725	ENSGALG00000040725	1844	0.885491	0.642271	0.79578	14.6507	29.7719	26.7005	15.7269	16.9803	14.5672	11.3285	85.6775	0.284984	23.0357	10.0895	22.6628	26.1495	27.887	30.1027
16200	SP1	ENSGALG00000035487	2592	0.885433	0.642289	0.79578	2.19947	2.67392	6.7165	0	0.621265	3.30748	4.86915	3.19842	0	2.38992	5.10735	5.91168	7.16822	5.58694	8.19914
15575	SFMBT2	ENSGALG00000009279	2410	0.882846	0.643121	0.796308	7.88905	7.62623	24.5618	0	15.2197	8.93266	7.40384	0.687991	14.755	2.93761	12.1243	24.8545	26.1268	24.0354	23.2304
10661	HDAC7	ENSGALG00000039710	4471	0.881718	0.643483	0.796675	1.81343	2.78156	5.3857	0	0	3.40882	3.84488	3.54954	1.56717	3.31536	2.69416	4.90007	5.44196	4.95758	6.24319
9487	EYA3	ENSGALG00000000777	4423	0.873808	0.646033	0.7981	9.93412	15.064	22.0364	4.04766	9.5874	14.3432	11.7582	10.3893	12.4358	16.5066	20.9244	22.7334	21.9707	21.2816	22.16
9455	EWSR1	ENSGALG00000008149	2208	0.858885	0.650872	0.800599	18.5378	17.985	21.069	28.3074	3.48449	11.9069	30.4523	31.2173	0.238003	16.2322	24.2524	24.6047	22.5064	16.2626	20.9022
1081	BHLHE23	ENSGALG00000005718	4075	0.855707	0.651907	0.801005	1.60823	2.70164	2.94936	0	0.570801	2.71156	3.15054	0	7.04981	1.73733	2.01943	2.17536	3.03968	3.11856	3.46387
14375	PRMT7	ENSGALG00000038865	2217	0.844663	0.655517	0.802314	9.89503	19.528	20.0792	0	21.3063	9.53842	8.73544	47.5441	15.5654	5.58834	9.41412	19.6496	19.555	20.7956	20.3166
9425	ESRRB	ENSGALG00000041775	1694	0.82674	0.661418	0.80638	2.25711	4.42518	6.13155	0	0	7.87234	1.15608	0.978783	5.89417	3.78743	7.04034	7.25135	6.9639	3.66369	6.64727
11214	IRF1	ENSGALG00000006785	1896	0.825809	0.661725	0.806653	1.10117	0.816808	0.617738	0	2.4536	0	1.95106	0	0	3.26723	0	0.267167	0.622197	1.24699	0.334596
11337	KAT7	ENSGALG00000009944	1830	0.801748	0.669734	0.812716	36.3725	40.9021	47.1035	9.78296	45.7577	43.932	46.0172	84.6503	18.6657	24.9044	35.388	47.4716	44.9634	50.306	45.6729
12417	MLXIP	ENSGALG00000004397	2445	0.791981	0.673013	0.814363	14.2919	9.85633	23.9241	29.974	0.365898	10.3632	16.4647	11.4315	17.1946	1.62875	9.17036	22.4269	25.6925	22.6035	24.9736
5318	ENSGALG00000032405	ENSGALG00000032405	1638	0.786224	0.674953	0.815777	0.652117	0.84431	2.03477	0	0.764634	1.04676	0.797072	1.87989	0	0.405199	1.09216	0.927743	1.8005	2.7966	2.61426
2411	CREB3L1	ENSGALG00000008393	1702	0.747964	0.687989	0.825945	3.16121	8.21993	7.1334	0	0	6.3802	6.26465	0	0	30.287	2.59268	5.35715	6.75789	7.37976	9.0388
9993	FUS	ENSGALG00000032219	1496	0.743907	0.689386	0.82633	5.66399	8.93418	17.4745	3.07926	0.119602	4.32979	15.1273	6.96663	0	8.28165	20.4884	16.1682	20.3054	15.5078	17.9165
4032	ENSGALG00000012619	ENSGALG00000012619	2595	0.740835	0.690446	0.82682	14.743	23.4496	21.3787	1.17	2.48219	31.4214	23.8983	9.03649	1.48507	35.2958	47.9811	20.3498	20.8547	20.8414	23.4689
18082	YEATS4	ENSGALG00000029135	1337	0.737024	0.691763	0.827431	11.9909	16.6238	17.1327	22.5521	3.88093	11.1143	10.4162	27.8144	20.3077	2.31663	16.0564	19.0382	16.2129	16.91	16.3699
10815	HNRNPDL	ENSGALG00000023199	1128	0.736904	0.691804	0.827431	448.203	474.341	671.93	252.549	341.352	516.98	681.931	368.528	300.958	593.499	634.38	708.853	710.243	612.297	656.327
12236	MED19	ENSGALG00000007341	991	0.709239	0.70144	0.833449	8.23469	6.00947	6.03106	0	7.40252	18.0706	7.46562	0.478033	0	9.59965	13.9602	7.15607	4.46399	6.26265	6.24151
11221	IRF7	ENSGALG00000014297	1999	0.683401	0.710561	0.839202	0.214432	0.466262	0.674453	0	0	0.857727	0	0	0	1.32809	0.536954	0.950252	0.663905	0.369607	0.71405
15684	SIN3B	ENSGALG00000003771	2139	0.678078	0.712455	0.840429	31.4679	43.8795	57.3233	23.9834	26.0147	36.6058	39.2678	66.1097	44.7139	20.4793	44.215	53.6387	59.6323	57.8917	58.1305
4083	ENSGALG00000013600	ENSGALG00000013600	1269	0.651246	0.722078	0.846817	4.51547	8.15128	6.84903	0.0825019	3.8069	7.65646	6.51602	0.559966	2.07057	16.9111	13.0635	6.8857	6.27492	6.9867	7.24878
18066	XRN2	ENSGALG00000008372	3587	0.650504	0.722345	0.847043	30.5808	45.6392	54.2808	41.0082	16.0618	29.5831	35.6703	51.9691	17.7759	51.501	61.3108	52.886	54.2237	55.4081	54.6052
13198	NR2E1	ENSGALG00000015305	2693	0.645041	0.724321	0.848121	0.805723	1.58207	1.20775	0.272137	0	2.54675	0.404012	6.06896	0	0.0821531	0.177146	1.12859	1.69747	0.7682	1.23675
15353	SBNO2	ENSGALG00000037522	4122	0.642315	0.725309	0.848795	1.96712	3.63801	6.03693	0	0	4.80667	3.06182	0.91942	0	2.89832	10.7343	5.59144	6.29623	6.48863	5.77141
12625	MTA1	ENSGALG00000002803	1842	0.633318	0.728579	0.850613	132.777	175.052	251.505	95.6577	142.79	154.208	138.452	198.674	221.293	97.5275	182.715	240.83	263.54	246.362	255.29
13001	NFIC	ENSGALG00000041643	1065	0.62445	0.731817	0.853035	24.4035	20.4872	31.5835	27.9186	4.70411	30.0524	34.9387	36.2527	1.97375	13.7105	30.0118	28.7757	32.3998	33.4388	31.7197
14376	PRMT8	ENSGALG00000013272	2744	0.592446	0.743621	0.86096	13.9231	15.5897	31.0002	2.97602	9.32441	25.5495	17.8426	19.9402	17.5553	8.86889	15.9945	30.4132	30.4164	32.3648	30.8065
3938	ENSGALG00000010651	ENSGALG00000010651	1790	0.592129	0.743739	0.860976	15.667	22.7438	20.9195	12.809	16.493	20.1154	13.2505	18.2611	0.0978606	57.2253	15.391	18.5357	20.2655	22.3717	22.505
815	ATF2	ENSGALG00000009287	1907	0.588976	0.744913	0.861598	19.5483	17.03	33.9063	27.5599	10.8837	20.5795	19.1699	17.265	20.3922	10.3252	20.1378	32.6055	35.6473	33.9396	33.4329
18303	ZNF703	ENSGALG00000034229	1992	0.565977	0.753529	0.867568	1.43786	2.05814	1.38513	0	0	4.87753	0.873899	2.61598	0	2.4434	3.17317	1.46217	1.70261	1.26108	1.11465
11777	LIN28B	ENSGALG00000026761	774	0.53527	0.765187	0.874243	35.4065	26.8519	67.4608	0	56.6362	27.0752	57.9144	57.2272	9.73169	8.86097	31.5879	62.1732	61.5372	75.0299	71.1029
3116	E2F4	ENSGALG00000001722	1254	0.513814	0.77344	0.879423	10.2524	16.2978	27.1542	0.0834887	5.70731	25.6749	9.54389	27.7665	0	17.6426	19.7821	28.7811	26.5758	25.6887	27.5713
10544	GTF2F2	ENSGALG00000016974	1585	0.513074	0.773726	0.879665	37.8947	53.7089	62.3372	2.51003	81.8423	41.8282	25.3982	42.591	48.6278	56.9497	66.6671	61.6007	74.0559	52.9544	60.7377
14473	PSPC1	ENSGALG00000017142	1700	0.46446	0.792764	0.889462	95.5236	124.603	181.776	18.8451	119.564	92.0055	151.681	163.159	88.7187	113.873	132.663	181.612	193.434	176.106	175.951
13195	NR2C1	ENSGALG00000011327	1238	0.456744	0.795828	0.890513	24.2898	21.1108	29.4191	0	59.6896	15.8502	21.6195	38.4572	14.9984	16.441	14.5467	31.5058	27.634	29.8402	28.6963
12518	MRGBP	ENSGALG00000005531	1803	0.453407	0.797157	0.891388	25.1563	28.1495	57.9575	25.3753	5.06109	41.103	29.0858	10.7726	29.7294	37.3025	34.7934	48.6039	63.3844	60.7303	59.1115
11651	L3MBTL3	ENSGALG00000034030	1258	0.452993	0.797322	0.891435	20.9984	15.9161	31.5885	2.74637	14.6496	42.5545	24.0433	19.017	0.417736	2.98971	41.2397	28.9916	35.986	31.2452	30.1312
11172	INSR	ENSGALG00000040758	4062	0.45221	0.797634	0.891701	8.26945	11.2381	17.0907	1.03097	0.0440483	14.164	17.8388	15.2196	2.97557	10.0216	16.7356	16.4609	17.2437	16.6977	17.9604
805	ASXL3	ENSGALG00000015196	6648	0.45053	0.798305	0.891868	42.3516	58.3954	77.0764	59.2295	6.7285	62.9591	40.4892	46.8885	56.6511	77.4068	52.6352	79.3005	74.5288	77.7298	76.7465
14316	PRDM2	ENSGALG00000038780	5063	0.443918	0.800948	0.893492	88.9333	92.0084	144.827	92.4532	60.3247	101.182	101.773	86.269	130.85	66.7255	84.1887	135.316	139.247	165.66	139.083
12250	MED8	ENSGALG00000009993	2203	0.443353	0.801175	0.893492	1.6172	1.2831	1.83616	1.23562	0.243655	2.42138	2.56814	1.29023	0.238544	0.301278	3.30235	1.83948	1.67341	1.74398	2.08777
15276	RUVBL1	ENSGALG00000005931	656	0.432216	0.805648	0.896062	70.9048	80.6103	158.217	51.0707	66.2783	74.0552	92.2149	100.379	67.8251	78.2428	75.9941	177.794	164.544	152.724	137.806
16418	STAT2	ENSGALG00000030661	5221	0.430126	0.806491	0.896269	0.594682	0.566636	0.479012	0.0601579	0	0.401382	1.91719	1.58787	0	0.0847494	0.593919	0.388085	0.536631	0.566055	0.425278
17869	VPS72	ENSGALG00000000793	1259	0.422849	0.80943	0.897842	5.0998	9.2368	8.80874	2.74419	0	7.112	10.543	3.57462	0.278269	17.7483	15.346	8.44917	11.5954	5.8685	9.3219
16316	SRF	ENSGALG00000032029	2554	0.421135	0.810124	0.898123	1.49741	3.02258	3.44032	0	0.280226	1.79023	3.9192	0	0	3.63822	8.45211	3.86753	4.15707	3.06646	2.67021
11649	L3MBTL1	ENSGALG00000030710	2532	0.419065	0.810963	0.898332	5.32467	7.93214	13.1879	0.0826974	3.74526	5.86881	11.6019	19.2711	0	3.93196	8.52555	11.9035	13.0455	12.0806	15.722
3481	ENSGALG00000002689	ENSGALG00000002689	1563	0.405533	0.816469	0.901819	3.33231	2.29588	5.31868	0	2.7474	1.95021	8.63163	0.606182	0.112073	3.96332	4.50195	5.34743	5.56633	5.38888	4.97205
818	ATF6	ENSGALG00000032278	2016	0.404451	0.816911	0.90214	8.35852	12.3008	18.1937	0.467388	1.06503	10.9619	20.9398	31.958	0	3.40198	13.8431	17.7769	19.2372	16.5654	19.1954
12610	MSL3	ENSGALG00000041433	1564	0.400879	0.818371	0.902589	60.0312	62.0351	106.427	45.9211	65.6666	55.9107	72.6263	71.0294	31.3604	63.0897	82.6608	103.237	112.198	101.567	108.707
11215	IRF2	ENSGALG00000010642	1475	0.390489	0.822633	0.904511	14.3839	14.9158	24.4786	36.4835	5.09479	10.2036	5.75351	15.0952	25.0583	10.0495	9.46022	22.4942	24.4935	26.949	23.9779
10542	GTF2E1	ENSGALG00000042320	1326	0.367237	0.832253	0.910358	1.97047	2.60507	5.20316	0	0.269871	3.01714	4.59489	0	0	0.166846	10.2534	5.44367	4.89311	5.57198	4.90387
16638	TAF8	ENSGALG00000003498	732	0.36491	0.833222	0.910835	24.4019	35.8236	39.3306	40.4763	5.13307	23.1632	28.8351	66.6589	9.33285	49.8693	17.4333	39.9633	37.8724	41.7871	37.6996
11321	JUN	ENSGALG00000010870	1708	0.357474	0.836326	0.912979	34.6839	32.6246	60.7082	27.2771	14.5612	43.3891	53.5084	38.137	14.871	50.2579	27.2323	51.3072	59.6577	64.4542	67.4136
13200	NR2F1	ENSGALG00000027907	1230	0.354225	0.837685	0.913915	7.50364	4.52893	5.89225	0	0	10.3774	19.6371	10.5915	0.142415	1.07921	6.30254	4.5301	6.59377	6.127	6.31815
719	ARNTL2	ENSGALG00000014096	3244	0.343854	0.842041	0.916095	11.9204	11.4984	24.2372	18.3313	14.0095	8.63288	6.70779	10.2953	18.5754	3.40996	13.7131	20.6117	29.5921	22.5935	24.1515
7242	ENSGALG00000042117	ENSGALG00000042117	318	0.336779	0.845025	0.917293	30.1282	45.5195	76.5162	0	28.6954	66.499	25.3183	14.8972	1.65255	70.2675	95.2607	71.6813	83.932	77.1372	73.3143
1506	CARF	ENSGALG00000008474	2284	0.332642	0.846774	0.918362	7.78209	8.38487	17.1008	2.70446	7.05043	15.1808	6.19267	9.54099	0	5.61814	18.3804	15.9682	16.6571	19.668	16.1098
2410	CREB3	ENSGALG00000002523	1784	0.317914	0.853033	0.921728	0.766377	1.34139	1.82898	0	0	1.60183	1.46368	0	0	1.48815	3.8774	1.27773	2.14909	2.73339	1.15571
2077	CITED2	ENSGALG00000013818	902	0.292027	0.864146	0.927664	0.919124	0.684091	1.1022	0	0.99182	1.47846	1.20621	0	0	2.20748	0.528884	1.26356	1.63482	0.982941	0.527489
17781	UTP4	ENSGALG00000000638	1574	0.255967	0.879868	0.936747	0.786315	1.04404	1.7749	0	0	0.242072	2.90319	0	0	1.82725	2.3489	1.93093	1.96739	1.68986	1.51142
12254	MEF2D	ENSGALG00000037787	1784	0.250152	0.88243	0.938009	11.1335	14.894	15.1486	6.63146	1.20353	26.6971	10.0018	18.1898	0.0981897	14.8815	26.4064	15.3327	15.2089	14.4953	15.5576
2208	CNOT7	ENSGALG00000013649	2526	0.247437	0.883628	0.938312	45.8708	55.7768	104.643	54.2125	22.7374	64.4086	42.1246	33.4762	100.414	34.0704	55.1464	98.0609	98.7157	118.636	103.158
718	ARNTL	ENSGALG00000005378	2393	0.231813	0.890558	0.942144	11.0778	16.1767	23.1251	11.5501	10.1687	12.499	10.0935	15.0454	16.4703	19.7848	13.4065	23.9726	23.6011	22.7242	22.2024
12627	MTA3	ENSGALG00000009925	1986	0.213418	0.898787	0.946999	20.1532	23.6833	40.6937	0	3.33343	59.8583	17.4212	28.982	0.970229	36.3161	28.4647	38.3227	43.8075	43.7503	36.8945
1669	CCNL1	ENSGALG00000009699	1569	0.211228	0.899772	0.94737	26.1026	23.1161	45.4345	1.13436	18.36	37.7622	47.1538	18.7198	16.5234	33.2774	23.9439	41.7281	45.1122	45.7716	49.1261
9926	FOXK1	ENSGALG00000004460	2134	0.201311	0.904244	0.949393	14.1164	16.7557	22.5322	2.01148	0.92229	19.3725	34.1594	5.10582	14.2008	17.3134	30.4027	21.4227	21.4212	24.0973	23.1878
13316	NUP107	ENSGALG00000009934	3054	0.197772	0.905846	0.950163	24.4868	27.6254	40.3795	23.6883	17.5175	28.8823	27.8592	35.7548	6.07992	31.8021	36.8647	38.6048	39.3035	39.676	43.9339
4621	ENSGALG00000028367	ENSGALG00000028367	1953	0.197717	0.905871	0.950163	8.19441	11.6205	14.8828	0.0536072	0	15.1199	17.6042	13.2198	0.089693	11.5547	21.6176	18.8043	13.9684	10.5171	16.2415
7245	ENSGALG00000042137	ENSGALG00000042137	1257	0.196699	0.906332	0.950352	1.37722	2.71463	2.60745	2.99842	0	0.606239	1.90422	0	1.11485	1.58405	8.15963	2.82087	1.87698	2.7038	3.02813
16543	SUZ12	ENSGALG00000003277	2160	0.196126	0.906592	0.950541	15.9588	17.4311	30.8511	9.88785	22.7797	23.1082	8.05929	8.7728	9.5695	13.008	38.3741	28.4347	31.4037	31.3325	32.2336
2509	CTCF	ENSGALG00000001817	5534	0.195277	0.906977	0.950595	14.921	19.2779	29.726	12.6943	6.27237	18.1078	22.6094	29.8329	9.55936	22.5476	15.1719	29.8858	30.9364	29.8528	28.229
3289	ELOF1	ENSGALG00000032489	300	0.178229	0.914741	0.955906	2.53941	1.90128	2.6036	0	0	5.08028	5.07735	0	0	4.42477	3.18036	0.844246	2.45768	3.9405	3.17197
4129	ENSGALG00000014643	ENSGALG00000014643	7144	0.176947	0.915328	0.956389	12.4608	11.2017	18.6038	0.468958	17.2062	18.4004	13.7676	13.5276	8.41034	10.2815	12.5874	19.8003	17.1941	19.5053	17.9156
14374	PRMT3	ENSGALG00000003958	2367	0.166772	0.919996	0.959203	22.8549	26.9105	41.9373	32.8637	22.6018	16.0972	19.8571	25.3177	26.1979	21.9649	34.1616	47.6694	43.9205	39.6422	36.5172
10656	HDAC10	ENSGALG00000041251	1905	0.165446	0.920606	0.959203	12.7088	12.3156	23.7153	2.36319	13.8068	20.5011	14.164	26.6085	0.275859	14.8654	7.51266	24.1973	27.7118	26.2183	16.734
13125	NONO	ENSGALG00000005507	2435	0.142746	0.931114	0.965501	82.6859	113.989	171.778	98.5465	68.8509	78.0038	85.3424	141.827	79.708	110.846	123.574	180.048	178.467	166.156	162.441
16312	SREBF1	ENSGALG00000027188	3210	0.14189	0.931513	0.96566	0.52114	0.662971	0.630318	0	0	0.118698	1.96586	0	0	1.72304	0.928843	0.394508	1.01063	0.276203	0.839929
16619	TADA2A	ENSGALG00000005452	1332	0.132802	0.935756	0.967483	19.6618	27.4729	42.0457	13.5978	16.9253	23.4563	24.668	33.6093	4.2083	36.707	35.3672	39.6454	42.954	42.6	42.9835
12233	MED16	ENSGALG00000001978	2493	0.119039	0.942217	0.97157	3.0632	4.12817	5.73039	0	0	0.382091	11.8707	0	0	10.9155	5.5972	6.34963	6.56564	4.08987	5.91642
16800	TERF2IP	ENSGALG00000000903	2042	0.105234	0.948743	0.973801	7.41408	9.68937	13.8476	0.615249	5.52019	18.1927	5.32813	12.9916	1.02941	16.7933	7.94311	13.0854	13.4318	14.0388	14.8346
5818	ENSGALG00000034903	ENSGALG00000034903	1515	0.0893749	0.956296	0.977674	1.11314	0.764795	1.53595	0	0	0	4.45256	1.56347	0	0	1.49571	1.75536	1.55734	1.36552	1.4656
2565	CUX2	ENSGALG00000004598	4077	0.0843673	0.958694	0.979206	7.3665	9.27688	12.08	0	3.99365	11.9157	13.5567	3.83447	0.859311	24.3107	8.10301	12.6109	12.7315	10.2572	12.7205
16527	SUPT5H	ENSGALG00000039160	3225	0.0790561	0.961243	0.980511	8.48639	8.78218	14.842	2.01274	2.49662	16.4814	12.9548	10.2825	0	9.05534	15.7908	17.2383	15.089	13.5168	13.5239
2909	DMD	ENSGALG00000016281	10575	0.0677181	0.966708	0.983118	19.9394	26.8566	41.918	36.4922	20.9633	12.3224	9.9798	21.7939	27.1328	30.147	28.3526	37.6857	41.8607	45.8328	42.2929
16634	TAF4B	ENSGALG00000015122	2231	0.060398	0.970252	0.985301	2.70044	3.36495	5.44556	0.375419	3.20797	1.36628	5.8521	1.16787	0	9.61906	2.67287	4.82481	5.75037	6.15979	5.04728
11338	KAT8	ENSGALG00000029889	1160	0.0551881	0.972783	0.98645	7.89568	11.8124	15.8085	8.48389	0	3.77737	19.3214	12.4559	0	13.9228	20.8711	14.1921	18.0512	15.5412	15.4497
13192	NR1H3	ENSGALG00000038059	3264	0.0488713	0.97586	0.987481	12.0763	17.2435	24.2633	2.24529	24.7227	6.53713	14.8	36.0668	3.70305	0.813376	28.3908	22.5417	28.7783	22.4098	23.3233
3297	ELP1	ENSGALG00000001947	4005	0.0474715	0.976544	0.987661	10.8646	12.1799	19.2671	1.77759	10.1413	10.8931	20.6463	13.2479	8.00404	12.0424	15.4253	15.2091	15.9795	31.0296	14.85
14203	PPARD	ENSGALG00000002588	1757	0.0295265	0.985345	0.992719	3.97149	5.934	8.21685	0	10.5909	1.0843	4.21083	14.2901	0	7.68101	1.76485	7.7121	9.1481	6.98054	9.02666
3372	ENSGALG00000000669	ENSGALG00000000669	1823	0.0276986	0.986246	0.99346	1.1935	1.3107	1.96664	0	2.35556	2.29909	0.119364	2.20884	1.92178	0	1.11217	1.66719	2.26489	2.10751	1.82697
3273	ELF2	ENSGALG00000009774	1584	0.024671	0.98774	0.994129	18.0292	20.063	33.2365	18.9032	9.37545	26.9409	16.897	15.4022	34.3927	22.6267	7.83043	34.2176	34.3516	32.8375	31.5394
12232	MED15	ENSGALG00000006430	1587	0.00515985	0.997423	0.998624	25.8484	22.9052	39.8318	4.94777	9.58322	51.0189	37.8436	36.5671	26.0493	12.5466	16.4579	36.3872	40.2334	38.7346	43.9718
13077	NLK	ENSGALG00000005699	2064	0.0050916	0.997457	0.998624	16.4591	18.209	27.5206	9.89123	8.14868	20.491	27.3055	23.2964	6.1106	13.613	29.8159	27.8552	27.6489	25.9168	28.6614
10543	GTF2E2	ENSGALG00000010283	2165	0.00475344	0.997626	0.99871	16.014	21.506	30.8764	22.9216	6.9421	11.8794	22.3129	23.413	1.6182	31.5763	29.4165	33.1069	33.5788	29.349	27.4708
11264	ITGB3BP	ENSGALG00000010995	364	0.00186259	0.999069	0.999486	36.1021	36.0135	54.8852	1.15049	28.0184	21.982	93.2575	62.47	16.8433	35.2523	29.4882	45.2275	51.4492	53.5865	69.2779
